# Supplementary material
Source: Elsevier journal article supplement (https://www.sciencedirect.com/science/article/pii/S0009739X21003833)
Supplement: mmc2 [file S0009739X21003833:mmc2.pdf]

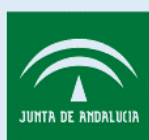

Servicio Andaluz de Salud  
**CONSEJERÍA DE SALUD Y FAMILIAS**

2018/19

# PROTOCOLOS

## DE DIAGNÓSTICO Y TRATAMIENTO DEL CÁNCER

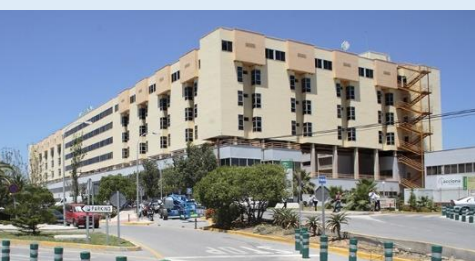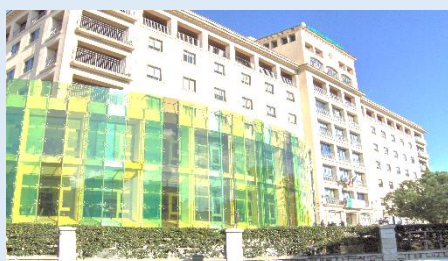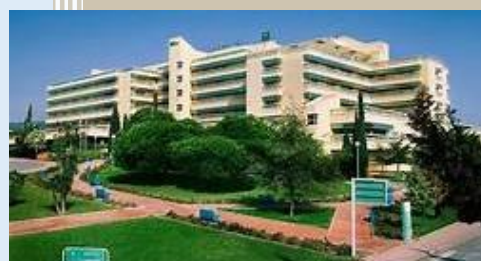

Unidad de Gestión Clínica Intercentros de  
los Hospitales Universitarios Regional y  
Virgen de la Victoria de Málaga

Área de Oncología del Hospital Costa del Sol  
(Marbella)



## Introducción

Esta edición de los Protocolos de Diagnóstico y Tratamiento del Cáncer de la Unidad de Gestión Clínica Intercentros de los Hospitales Universitarios Regional y Virgen de la Victoria de Málaga y del Área de Oncología del Hospital Costa del Sol, elaborada de forma coordinada por los facultativos responsables de cada patología en los tres centros hospitalarios, es una herramienta fundamental para la consecución de importantes objetivos relacionados con la calidad asistencial, la equidad, el uso racional de los recursos sanitarios públicos y, en especial, para disminuir la variabilidad de la práctica clínica oncológica.

Estos protocolos son de obligado cumplimiento para todos los oncólogos médicos de los tres centros sanitarios y cualquier decisión terapéutica no recogida en los mismos debe ser consensuada en sesión clínica y autorizada explícitamente por el Jefe de Servicio de Oncología Médica del Hospital correspondiente.

Especialmente importante en esta edición es la inclusión de una escala de valor (la escala de magnitud de beneficio clínico de la *European Society of Medical Oncology*) que otorga a las terapias más recientes una valoración objetiva sobre su impacto real en la historia natural de la patología en la que se prescribe.

Por último, pero no menos importante, hay que recordar que no es obligatorio que todos los pacientes reciban todas las líneas de tratamiento que se han protocolizado para una situación clínica concreta. La prescripción de cada línea de tratamiento, especialmente segundas líneas y posteriores, deberá adaptarse a la situación clínica de cada caso sin olvidar las implicaciones éticas de cada prescripción que realizamos:

*“No todas las acciones orientadas a la mejora de la salud son éticamente aceptables. Más aún, la actividad de salud pública no es éticamente neutra, sino que implica juicios de valor sobre lo correcto y lo justo. ¿Es todo lo factible éticamente admisible? No. ¿Es lícito utilizar cualquier instrumento en toda la gama de sus posibles aplicaciones? No.*

*El conocimiento es siempre positivo. Su aplicación puede no serlo. Puede incluso ser perversa. Es por esto que la ética ha pasado a ser tan relevante, especialmente por el incremento de saberes y por su puesta en práctica progresivamente guiada por intereses económicos (UNESCO)”*





## Índice

|                                                                                           |     |
|-------------------------------------------------------------------------------------------|-----|
| Introducción .....                                                                        | 3   |
| Índice .....                                                                              | 5   |
| Cáncer de cabeza y cuello .....                                                           | 7   |
| Cáncer microcítico de pulmón y variedad mixta de carcinoma de células pequeñas.....       | 12  |
| Carcinoma de pulmón no microcítico (CPNCP) .....                                          | 15  |
| Mesotelioma.....                                                                          | 29  |
| Cáncer de mama.....                                                                       | 31  |
| Cáncer de esófago y de la unión gastroesofágica (SIEWERT I-II).....                       | 51  |
| Adenocarcinoma gástrico y adenocarcinoma de la unión gastroesofágica SIEWERT III .....    | 55  |
| Cáncer de páncreas .....                                                                  | 60  |
| Cáncer de vías biliares .....                                                             | 66  |
| Hepatocarcinoma .....                                                                     | 69  |
| Cáncer colorrectal .....                                                                  | 73  |
| Carcinoma de ano.....                                                                     | 84  |
| Cáncer de ovario, trompa y primario peritoneal.....                                       | 86  |
| Cáncer de cérvix .....                                                                    | 90  |
| Cáncer de endometrio.....                                                                 | 93  |
| Cáncer de vulva .....                                                                     | 99  |
| Neoplasia trofoblástica gestacional .....                                                 | 103 |
| Carcinoma urotelial de vejiga .....                                                       | 106 |
| Cáncer de riñón .....                                                                     | 109 |
| Cáncer de próstata .....                                                                  | 112 |
| Tumores germinales de testículo .....                                                     | 141 |
| Melanoma .....                                                                            | 145 |
| Cáncer de piel no melanoma.....                                                           | 151 |
| Linfoma no Hodgkin .....                                                                  | 157 |
| Linfoma de Hodgkin.....                                                                   | 176 |
| GIST: Tumores del Estroma Gastrointestinal.....                                           | 183 |
| Sarcoma de partes blandas .....                                                           | 187 |
| Osteosarcoma e histiocitoma fibroso maligno de hueso y condrosarcoma indiferenciado ..... | 193 |

|                                                                                             |     |
|---------------------------------------------------------------------------------------------|-----|
| Sarcoma de Ewing, condrosarcoma mesenquimal y PNET y desmoplásico de células redondas ..... | 198 |
| Sarcomas uterinos .....                                                                     | 203 |
| Neoplasias neuroendocrinas (NNE).....                                                       | 206 |
| Tumores cerebrales .....                                                                    | 221 |
| Cáncer de origen desconocido .....                                                          | 230 |
| Urgencias oncológicas .....                                                                 | 232 |
| Cáncer de tiroides.....                                                                     | 245 |
| Fiebre en el paciente oncológico.....                                                       | 248 |
| Manejo de la neutropenia febril.....                                                        | 252 |
| Bacteriemia relacionada con catéter.....                                                    | 259 |
| Enfermedad tromboembólica venosa (ETV): TEP, TVP y trombosis asociada a cateter .....       | 265 |
| Consejo genético (CG) .....                                                                 | 269 |
| Toxicidades a nuevas terapias anti-diana.....                                               | 274 |
| Soporte nutricional y cribado .....                                                         | 279 |
| Tratamiento antiemético.....                                                                | 299 |
| Anemia inducida por quimioterapia.....                                                      | 304 |
| Preservación de la fertilidad en pacientes que van a recibir QT .....                       | 306 |
| Tratamiento del dolor .....                                                                 | 307 |
| Directrices para el uso de factores estimulantes de colonias granulocíticas .....           | 309 |
| Extravasación.....                                                                          | 311 |
| Síndrome de lisis tumoral.....                                                              | 313 |
| Evaluación geriátrica/cribado de fragilidad.....                                            | 315 |

## Cáncer de cabeza y cuello

### I. DIAGNÓSTICO

- **Analítica completa** con perfil nutricional.
- **Anamnesis y exploración física.** (Recoger consumo de tabaco (paquetes-año) alcohol (gramos/día), Vacunación HPV)
- **Exploración ORL completa** (incluyendo cavum) con videoendoscopia y biopsia del tumor primario.
- **Endoscopia** bajo anestesia general si existen dudas en la extensión del tumor o dificultad para obtener biopsias.
- **TAC cervical** con contraste (excepto en el T1 de cuerda vocal). RMN en tumores de orofaringe, nasofaringe y cavidad oral
- **Rx Tórax PA y lateral** (TAC de tórax a pacientes N<sub>2B-C</sub> y N3 y en carcinoma de cavum grado II-III de la OMS).
- **Estadificación por TNM 8ª Edición.**

### II. ANÁLISIS TUMOR

- En pacientes con carcinoma de orofaringe se realizará determinación de p16 por inmunohistoquímica y determinación y serotipado de DNA de HPV por PCR.
- En pacientes recurrentes o metastásicos que mantengan buen estado general se realizará determinación de expresión de PD-L1 por inmunohistoquímica (preferentemente mediante el anticuerpo de DAKO)

### III. TRATAMIENTO POR ESTADIOS:

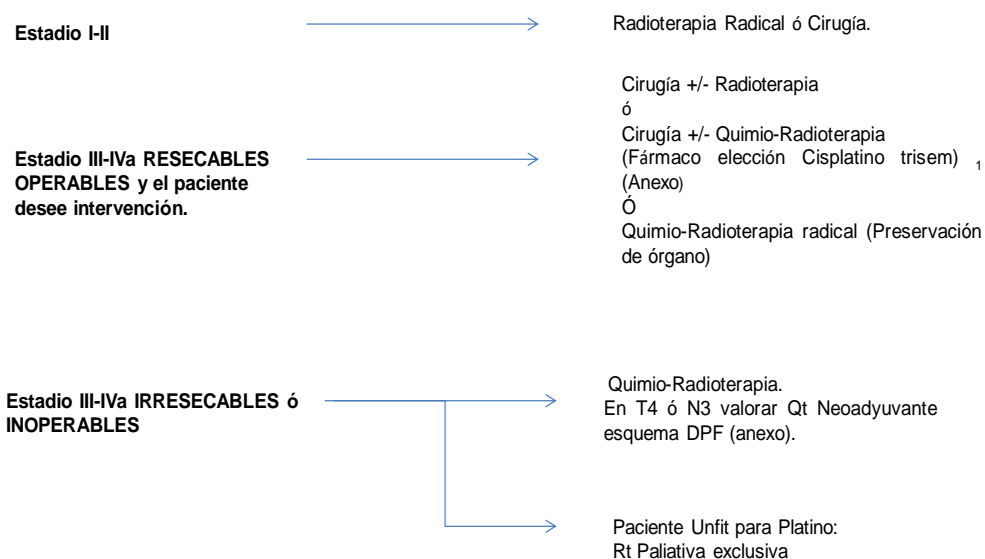

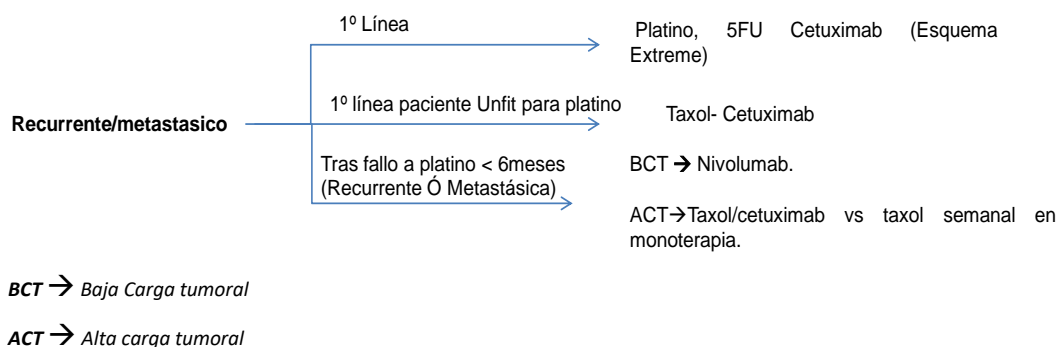

**Estadio recurrente/metastásico siguientes líneas:** (Siempre que sea posible valorar inclusión dentro de EC)

- Nivolumab si ECOG 0-1 y baja carga tumoral local/regional.
- Paclitaxel Cetuximab (en los casos no candidatos a nivolumab).
- Docetaxel.
- Metrotexate.

NOTA: los pacientes con ECOG 3 (en cualquier momento) y los pacientes con ECOG 2 (en segunda línea o posterior) son candidatos a Unidad de Cuidados Paliativos.

#### **IV. TRATAMIENTO EN RECAÍDAS LOCORREGIONALES**

- No irradiado previamente:
  - Resecable: Cirugía + Radioterapia+/- Quimioterapia
  - Irresecable: Radioquimioterapia concomitante.
- Irradiado previamente: Valorar posibilidad de rescate quirúrgico en comité multidisciplinar. Si no es posible:
  - Valorar reirradiación con o sin tratamiento concomitante (quimioterapia o cetuximab) si es posible.
  - Si no hay posibilidad, tratamiento sistémico paliativo (ver esquema superior).

#### **V. SEGUIMIENTO:**

##### **1º año:**

- Exploración física y ORL: Al mes de finalizar tratamiento (Cirugía o RT) y posteriormente cada 2-3 meses en función de la patología.
- TAC Cervical (O RMN según la PC del diagnóstico) 3 meses tras fin de tratamiento en pacientes no intervenidos quirúrgicamente (RT+/- QT radical).
- Rx tórax y analítica general anuales.

##### **2º año:**

- Exploración física y ORL: Cada 3 meses (tumores laríngeos no intervenidos quirúrgicamente) o 3-6 meses el resto de localizaciones.
- Rx tórax y analítica general anuales.

##### **3º - 4º año:**

- Exploración física y ORL cada 6 meses.
- Rx tórax y analítica general anuales.

**Posteriormente:**

- Exploración física y ORL anual.
- Rx tórax y analítica general anuales.

## **CARCINOMA DE NASOFARINGE**

### **I. DIAGNÓSTICO**

Exploración física completa.

Hemograma, bioquímica y perfil nutricional. Determinación de DNA de VEB en carcinoma no queratinizante (tipos II y III de la OMS).

TC o RMN cervical (o ambas).

TC de tórax-abdomen superior y gammagrafía ósea.

PET/TC: en caso de realizarse sustituye al TC TAP y a la gammagrafía ósea.

### **II. ESTADIFICACIÓN:**

Se utilizará la clasificación TNM AJCC Cancer Staging Manual, 8th; 2017. No obstante, tener en cuenta que gran parte de la evidencia científica que soporta el tratamiento actual está generada con clasificaciones previas, en las que se asignaban estadios T más avanzados que en la actual.

### **III. TRATAMIENTO POR ESTADIOS:**

La radioterapia radical es la piedra angular del tratamiento de estos pacientes. El campo de irradiación debe incluir el tumor primario, ambos lados del cuello y los ganglios retrofaríngeos. La dosis será de 66-70 Gy para todas las áreas macroscópicamente afectadas y 50 Gy para las áreas con riesgo de afectación microscópica. Se realizará técnica IMRT siempre que sea posible.

- Estadio I

Radioterapia radical.

- Estadio II

Radioterapia + Cisplatino concomitante.

Radioterapia radical exclusiva en T1 con N1 único y menor de 3 cm.

- Estadio III y IVA

Radioquimioterapia concomitante con cisplatino 100 mg/m<sup>2</sup> cada 3 semanas (3 dosis).

- Se valorará individualmente la administración de tres ciclos de quimioterapia adyuvante con cisplatino/5FU en los pacientes recuperados de la toxicidad cutánea y mucosa (dermitis y mucositis grado  $\leq 1$ ) de la RQT antes de las 8 semanas de fin de RT y que no hayan tenido toxicidad renal durante el tratamiento previo.
- En pacientes con T4 (afectación intracraneal significativa) o N3 se valorará en comité iniciar tratamiento con 3 ciclos de QT TPF antes de la radioquimioterapia radical.
- Los pacientes con persistencia ganglionar PET/TC positivas a las 12 semanas tras la finalización del tratamiento radiante serán presentados en comité multidisciplinar para evaluar cirugía ganglionar de rescate.

- Estadio IV B y recidivas

Se evaluarán individualmente en comité multidisciplinar para evaluar la posibilidad de alternativas de tratamiento curativo (recidivas locales de baja carga tumoral o resecables, enfermedad oligomestastásica, etc). Los pacientes con buen estado general candidatos a tratamiento sistémico paliativos serán tratados con la combinación de **cisplatino/gemcitabina**.

Más allá de la segunda línea no hay tratamiento estándar por lo que valorar ensayo clínico siempre que sea posible como primera opción.

#### **IV. SEGUIMIENTO**

A veces la detección temprana de posibles recaídas podría conllevar un tratamiento con intención curativa.

El seguimiento incluirá examen periódico de la nasofaringe y cuello. Exploración general y neurológica.

- Fibroscopia cada 3- 4 meses durante los primeros 2 años. Luego cada 6 meses hasta los 5 años. A partir del 5º año seguir anualmente.
- RM cada 6 meses los dos primeros años, luego anual hasta el 5º año.
- Estudio de imagen de tórax y función tiroidea una vez al año.

#### **ANEXO:**

##### Radioterapia adyuvante:

Criterios mayores:

- Margen quirúrgico positivo o microscópicamente afecto (inferior a 0,5 cm).
- Más de 2 ganglios afectados por el tumor.
- Afectación extracapsular extensa
- Estadios avanzados III (salvo laringe)- IV

Criterios menores:

- Afectación perineural, linfática, vascular
- Grado histológico III.
- Adenopatía > 2 cm.
- Adenopatías contralaterales múltiples de tamaño subclínico

Criterios para quimioterapia adyuvante asociada a radioterapia:

- Margen afecto
- Extensión extracapsular

##### Quimioterapia estándar(Concomitancia) (Obligatorio ECOG 0-1):

Cisplatino 100 mg/m<sup>2</sup> IV cada 21 días

> 70 años o no candidatos a platino → Cetuximab 400 mg/m<sup>2</sup> dosis inicial seguido de 250 mg/m<sup>2</sup>/IV semanal.

La duración del tratamiento concomitante será la misma que la de la radioterapia.

Quimioterapia neoadyuvante:

Esquema DPF (3 ciclos):

Docetaxel: 75 mg/m<sup>2</sup> D1

CDDP: 75 mg/m<sup>2</sup> D1

5FU: 750 mg/m<sup>2</sup> IC D1-D5 cada 21 días

\*añadir GCSF y CIPROFLOXACINO como profilaxis primaria.

Quimioterapia 1ª línea metastásica (Extreme) CADA 3 SEMANAS Hasta 6 ciclos:

- **CISPLATINO** 100mg/m<sup>2</sup> iv D1

**5 FU** 1000mg/m<sup>2</sup>/día iv ( infusion continua) x 5 días

**CETUXIMAB** 400 mg/m<sup>2</sup> la semana 1, despues 250 mg/m<sup>2</sup> semanal.

Nota: Se podrá usar como alternativa **CARBOPLATINO** AUC 5mg/mL/min IV D1 cada 21 días.

Una vez finalizados los 6 ciclos del esquema, se podrá continuar con Cetuximab semanal ó bisemanal de mantenimiento hasta progresión o toxicidad.

Quimioterapia tras progresión a platino en enfermedad recurrente o metastásica

- **NIVOLUMAB:** 3 mg/kg cada 2 semanas hasta progresión o toxicidad.

Quimioterapia más allá de la 2ª línea:

- **PACLITAXEL** 80 mg/m<sup>2</sup> semanal

**CETUXIMAB** 400 mg/m<sup>2</sup> la semana 1, despues 250 mg/m<sup>2</sup> las semanas sucesivas

- **MTX semanal:** 40 mg/m<sup>2</sup> IV o intramuscular.
- **DOCETAXEL semanal:** 40 mg/m<sup>2</sup>

Quimioterapia para enfermedad extendida en Cáncer de cavum:

- **CISPLATINO** 80 mg/m<sup>2</sup> d 1
- **GEMCITABINA** 1 g/m<sup>2</sup> D 1 y 8

## Cáncer microcítico de pulmón y variedad mixta de carcinoma de células pequeñas

### I. DIAGNÓSTICO

- **Diagnóstico anatomopatológico** mediante la **clasificación de la WHO (2013)**, sin ser obligada la inmunohistoquímica (*sinaptofisina*, *cromogranina*) para confirmación diagnóstica, pero debería ser usada para confirmar el diagnóstico en casos inciertos. Debe diferenciarse de otros tumores pulmonares neuroendocrinos tales como el *carcinoide típico y atípico* y del *carcinoma de células grandes neuroendocrino (LCNE)*.
- **Anamnesis con IPA** (índice paquetes/año).
- **Exploración física completa.**
- **Análítica con hemograma y bioquímica** (función renal + iones, hepática, LDH, calcio y proteínas totales/albumina).
- **Radiografía de tórax y TC tórax y abdomen superior.**
  - Derrame pleural / pericárdico = evacuación terapéutica y diagnóstica con análisis citológico.  
Si negativo, valorar videotoroscopia y ventana pericárdica respectivamente. Si se trata del único sitio sospechoso de metástasis, pero no hay células malignas identificadas en el análisis citológico y otra explicación clínica puede ser plausible, considerar *estatus M0*.
- **Pruebas funcionales respiratorias:** en enfermedad susceptible de tratamiento radical.
- **Fibrobroncoscopia con toma de biopsias, BAL y BAS.** Otros métodos invasivos deberán ser considerados de no obtener diagnóstico patológico (biopsia con aguja gruesa transtorácica, mediastinoscopia, EBUS, EUS).
- **PET-TC:** A valorar en pacientes con enfermedad limitada susceptible de tratamiento radical.
- **Gammagrafía ósea:** enfermedad susceptible de tratamiento radical, si no se ha realizado PET-TC previo y presencia de síntomas/signos de sospecha.
- **RM (preferible) ó TC cerebral con contraste:** enfermedad susceptible de tratamiento radical y en presencia de síntomas/signos de sospecha.

### II. ESTADIFICACIÓN

- Se debe emplear **8ª edición del sistema internacional de estadificación TNM (AJCC/UICC 2017)**.
- La antigua clasificación de la IASLC (2007) establece dos categorías: enfermedad limitada y extendida. La primera se define como aquel tumor confirmado a hemitórax y ganglios linfáticos regionales (hiliares ipsilaterales y/o contralaterales, supraclaviculares, mediastínicos) con citología negativa de existir derrame y que pueda ser incluida en un volumen de radioterapia. Aunque se siga usando debido a su utilidad práctica, esta clasificación debe abandonarse en beneficio de la clasificación TNM.



### **III. TRATAMIENTO**

#### **III.1 ENFERMEDAD LOCALIZADA**

- T1-2, N0-1 = **Cirugía y tratamiento de quimioterapia adyuvante** por 4 ciclos con esquema CDDP 60mg/m<sup>2</sup> iv + VP-16 120 mg/m<sup>2</sup> iv D1 y 150 mg/m<sup>2</sup> día vo D2-3.

- *pN1-2 o ausencia de linfadenectomía sistemática: RTE adyuvante.*
- *Si riesgo elevado de complicaciones perioperatorias y/o pruebas funcionales respiratorias que no permitan una resección completa: QTRT concomitante con CDDP + VP16.*

- T1-4, N1-3: **Tratamiento QT-RT concomitante** con RT hiperfraccionada (*esquema de Turrisi*) y QT con 4 ciclos de CDDP + VP-16.

- *Si tras valoración del paciente existe alguna contraindicación para el tratamiento concomitante (comorbilidades asociadas, ECOG, imposibilidad técnica por la radioterapia), seguir plan terapéutico secuencial: QT con CDDP/VP-16 cada 21 días x 4 ciclos y después RT secuencial.*

- T1-4, N1-3, M1a, M1b solitaria o no confirmada: **Tratamiento QT-RT radical**. Se recomienda comenzar con tratamiento de QT y tras 2 ciclos reevaluar radiológicamente, omitiendo tratamiento de RT si afectación metastásica evidente.

**\*\* Si existe contraindicación para administrar cisplatino, utilizar carboplatino AUC 5-6.**

#### **III.2 ENFERMEDAD METASTÁSICA**

**III.2.a. Primera línea:** De a 4 a 6 ciclos de QT basada en platino:

- Esquema CDDP + VP16 (1 ciclo c/21 días). Pacientes jóvenes, ECOG 0-1 y sin comorbilidades.

CDDP: 80 mg/m<sup>2</sup> iv D1

VP-16: 100 mg/m<sup>2</sup> iv D1 y 150-200 mg/m<sup>2</sup> oral D2 y 3

- Esquema CBDCA + VP16 (1 ciclo c/21 días). ECOG 0-2 y con contraindicación para cisplatino.

CBDCA: AUC 5-6 iv D1

VP16: 100 mg/m<sup>2</sup> iv D1 y 150-200 mg/m<sup>2</sup> oral D2 y 3

- Si contraindicación existente a etopósido, se puede valorar:

Esquema CDDP + CPT-11 (1 ciclo c/28 días)

CDDP: 60 mg/m<sup>2</sup> iv D1

CPT-11: 60 mg/m<sup>2</sup> iv D1, 8 y 15

**\*\*Si existe contraindicación para administrar cisplatino, utilizar carboplatino AUC 5-6.**

Valorar RTE pulmonar en pacientes con enfermedad extendida en respuesta parcial o completa a QT.

#### **III.2.b. Segunda línea:**

1. Enfermedad platino-sensible por intervalo libre de tratamiento (ILT)  $\geq$  3 meses:

- Retratamiento con mismo esquema usado en 1ª línea.
- CDDP + CPT-11, si no se ha empleado antes.

**\*\*Si existe contraindicación para administrar cisplatino, utilizar carboplatino AUC 5-6.**

## Cáncer microcítico de pulmón y variedad mixta de carcinoma de células pequeñas

---

### 2. Enfermedad platino-resistente por ILT < 3 meses:

- Topotecán 1.5 mg/m<sup>2</sup> iv D1-5 (1 ciclo c/21d)
- Topotecán 2,3 mg/m<sup>2</sup>/día vo D1-5 (1 ciclo c/21d).

### 3. Enfermedad refractaria (progresión en curso de QT o recaída < 6 semanas tras última dosis): Cuidados de soporte vs ensayo clínico disponible si ECOG 0-1.

## **IV. IRRADIACIÓN CRANEAL PROFILÁCTICA (PCI)**

Indicada si buen estado general (ECOG 0-2), según comorbilidades y de inicio precoz tras finalizar tratamiento de QT y en pacientes con:

- Enfermedad localizada (T1-2, N0-1)
- Enfermedad localmente avanzada (T1-4, N1-3) en respuesta a QT-RT (enfermedad estable o respuesta parcial/completa)
- Enfermedad metastásica
  - ECOG 0-1: ofrecer si respuesta a QT (respuesta parcial/completa)
  - ECOG 2: valorar sólo si respuesta parcial mayor (>50%).

## **V. SEGUIMIENTO**

- 1º y 2º año: Análítica y TC tórax- abdomen superior, cada 2-3 meses.
- 3º a 5º año: Análítica y TC de tórax - abdomen superior, cada 3-6 meses en pacientes con enfermedad localizada tratados con intención curativa.
- Posteriormente: Análítica y TC de tórax - abdomen superior, anualmente

## Carcinoma de pulmón no microcítico (CPNCP)

### I. DIAGNÓSTICO CLÍNICO

- **Anamnesis y exploración física completa.**
- **Analítica con hemograma y bioquímica** (GUCl, función hepática, calcio, prot. totales y albumina, LDH).
- **Radiografía de tórax PA y lateral.**
- **TC tórax y abdomen superior.** Importante que en el estudio se incluya en su totalidad el hígado y ambas suprarrenales. Con respecto a éstas últimas, toda lesión en una/dos suprarrenales > 2 cm debe de ampliar su estudio para descartar metástasis si no hay otras lesiones sospechosas de metástasis (*salvo lesiones ya conocidas de larga data y/o si en TC son de baja densidad por unidades Hounsfield*). Para ello solicitar TC suprarrenal, RM, PET-TC si anteriores inconcluyentes y PAAF si se modifica la actitud terapéutica global.
- **Valoración nutricional.** Si el paciente no ha sido derivado a Endocrinología/Nutrición desde Comité de Tumores, esta valoración debe realizarse durante la primera visita o posterior antes del inicio de tratamiento sistémico. Se empleará como método de cribado nutricional el denominado **Nutriscore** (ver protocolo de nutrición), que clasificará a los pacientes en 2 grupos en función de si presentan o no riesgo nutricional. Si Nutriscore  $\geq 5$ , derivación a Nutrición y realizar **VGS-GP** (Valoración Global Subjetiva Generada por Paciente) (anexo 2), que vuelve a clasificar al paciente en 3 grupos; si B (desnutrición moderada) o C (desnutrición severa).
- **PET-TC.** De realización obligada en pacientes candidatos a tratamientos con intención radical (*El valor más importante del PET-TC para el diagnóstico en el CPNCP es su VPN del 95% frente a su VPP del 75%*).
  - Precisión en estadificación de mediastino. Los hallazgos positivos en el PET-TC a nivel de mediastino deben ser confirmados histopatológicamente. Una excepción de confirmación patológica son aquellos pacientes con tumores periféricos y PET-TC negativo a nivel de mediastino.
- **Pruebas de función respiratoria.** Espirometría post-broncodilatador (FEV1, CVF, IT) y estudio de difusión pulmonar (DLCO). Solicitar en pacientes candidatos a tratamientos radicales, para valorar operabilidad en pacientes reseables y en pacientes que vayan a ser tratados con QT-RT para ver V20.
- **Fibrobroncoscopia (FBC) con cepillado bronquial y broncoaspirado.**
- **BAG pulmonar guiada por TC.** Indicada de inicio en tumores periféricos no accesibles por broncoscopia. En el resto, si muestra por FBC no concluyente/negativa.
- **Evaluación patológica de mediastino.**
  - PET-TC cN0 (negativo) = tumor central, ganglios  $\geq 1,5$  cm eje corto y T  $\geq 3$  cm:
    - **EBUS/EUS (preferiblemente) ó Mediastinoscopia** (*en función de disponibilidad y experiencia del centro, sabiendo que la mediastinoscopia no tiene buen acceso a la ventana aortopulmonar y cadena preaórtica*).
  - PET-TC y TC positivo
    - **EBUS/EUS.** Si estudio patológico negativo, se recomienda: **Mediastinoscopia**

**\*\*Estudios opcionales y situaciones especiales:**

- **GGO** = indicado en aquellos pacientes con síntomas de sospecha, con elevación de calcio sérico o de la fosfatasa alcalina sin otra causa plausible, y si no se ha realizado previamente PET-TC.
- **RM cerebral** = indicado en caso de síntomas o signos de sospecha. En ausencia de clínica, se puede valorar estudio si histología de adenocarcinoma,  $\geq$  cN2, estadio clínico IIIC, y en enfermedad EGFR/ALK.
- **RM torácica**. Estudio mandatorio para *tumores del ulcus superior (Pancoast)* con opciones quirúrgicas, para confirmar resecabilidad y planificación de la actitud quirúrgica.
- **Derrame pleural o pericárdico**. Debe de realizarse estudio citológico para confirmar malignidad, debiendo saber que la negatividad de la citología no permite descartar la etiología metastásica del líquido. De entrada, clasificaría al paciente como M1a. Solo reconsideraríamos dicha clasificación si el estudio citológico es negativo y existiera otra causa plausible no neoplásica para el derrame.

**II. DIAGNÓSTICO HISTOPATOLÓGICO**

- Se registrará por la clasificación de la WHO de 2015.
- Se ha de emplear la mínima cantidad de tejido (*BAG, bloque celular si citología, biopsia quirúrgica, etc*) para la tipificación del tumor y debería limitarse al uso de un máximo de 2 marcadores inmunohistoquímicos (TTF-1 y p40) en los casos sin clara diferenciación morfológica entre adenocarcinoma y carcinoma escamoso. En caso de ser negativos, se tendrá que recurrir a otro tipo de marcadores inmunohistoquímicos, según el algoritmo de Anatomía Patológica:
  - Adenocarcinoma: TTF1, napsina A, CK 7.
  - C. Epidermoide: p40, p63, CK 5, CK 6
  - Cel. Grandes con diferenciación neuroendocrina: cromogranina, sinaptofisina.
- Para todos los **pacientes con enfermedad avanzada y para determinados pacientes con enfermedad localizada, a demanda del Servicio de Oncología Médica**, ampliar determinaciones de:
  - **EGFR (Therascreen® PCR)** = Se determinará si *EGFR wild-type o EGFR-mutated*, que tipo y localización de la mutación. Se puede determinar en citología. Indicado para:
    - CPNCP histología no escamosa.
    - CPNCP escamoso sólo si nunca/escasamente fumador (< 15 paq/año).
  - **ALK** = Estudio inicial por inmunohistoquímica; en casos dudosos, se requiere confirmación con estudio FISH. Se determinará si sobreexpresión de ALK (IHQ) y/o translocación (*EML4-ALK*) o no. Su estudio presenta las mismas indicaciones que EGFR, y deben de realizarse de forma simultánea para ahorro de tiempo y muestra. Se puede igualmente determinar en citología.
  - **PD-L1** (inmunohistoquímica). Realización independientemente de la histología e historia tabáquica en paciente *fit* para inmunoterapia.
  - **ROS-1** = Estudio inicial por inmunohistoquímica; en casos dudosos, se requiere confirmación con estudio FISH. Indicado solo en CPNCP histología no escamosa.
  - **BRAF<sup>V600E</sup>** (cualquiera de las metodologías validadas). Determinar la presencia o no de la mutación. Indicado solo en CPNCP histología no escamosa.

### **III. ESTADIFICACIÓN**

La clasificación vigente actual y que debe emplearse para la estadificación clínica y patológica es la **clasificación TNM/AJCC 8ª edición (2017)**.

### **IV. TRATAMIENTO POR ESTADIOS**

Tras el diagnóstico clínico e histopatológico, **presentación obligada en el Comité de Tumores Multidisciplinar (CMT)** para definir la actitud terapéutica.

#### **IV.1. Estadios I y II**

En pacientes con estadios I y II, con buena situación funcional (PS 0-1) y respiratoria (tras la evaluación preoperatoria), el **tratamiento primario estándar es la cirugía oncológica con linfadenectomía mediastínica (LND) sistemática**. La LND sistemática trata de la extirpación de todos los ganglios de las estaciones ganglionares del pulmón y mediastino del lado operado, y en bloque con la grasa circundante. Deberá contener al menos 6 adenopatías, obligatorio el estudio AP de las estaciones N1 (3 ganglios) (lobares, interlobares, hiliares) sea cual sea la localización del tumor y ganglios mediastínicos N2 (3 ganglios) incluyendo siempre la estación 7 (subcarinal). En función de la localización tumoral (lateralidad), se deberán incluir: *regiones 2R (paratraqueal dcha superior), 4R (paratraqueal dcha inferior) para tumores derechos; regiones 5 (subaorticos –ventana AP) y 6 (paraaórticos) para tumores LSI y regiones 8 (paraesofágicos) y 9 (ligamento pulmonar) en tumores LII*. Para considerarse una resección tumoral completa, la adenopatía más alta extirpada debe ser negativa.

- Neumonectomía = Cuando implica bronquio principal o varios lóbulos pulmonares.
- Lobectomía = Tumores periféricos, bronquio lobar afectado distalmente.
- Bilobectomía en pulmón derecho = superior-medio si sobrepasa cisura; medio-inferior en afectación de bronquio intermediario.
- Resección en manguito = Tumor aflora en bronquio principal desde bronquio lobar o bien tumores centrales (preferencia sobre neumonectomía si se dan estas condiciones).
- Segmentectomía o resección en cuña = Tumores pequeños, periféricos sin crecimiento endobronquial.

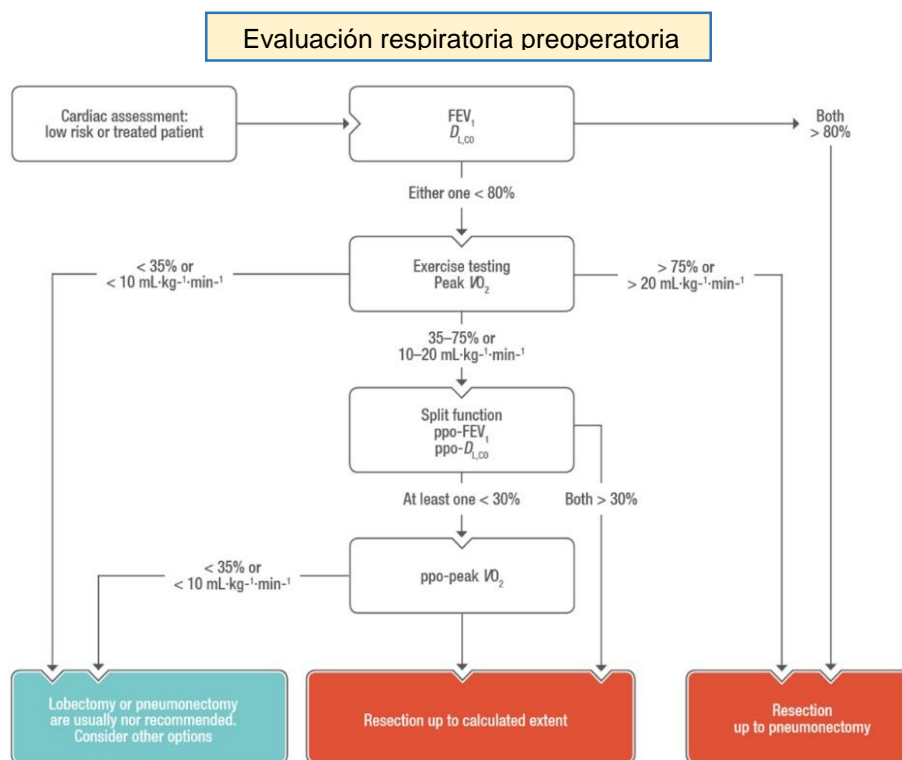

- Si márgenes positivos, se debe valorar de nuevo en comité para ver posibilidad de reintervención o de lo contrario plantear RTE adyuvante. Ésta última también estaría indicada en casos de cirugía incompleta no subsidiaria de reintervención.

En pacientes resecables pero no operables por PS, situación funcional respiratoria o por comorbilidades asociadas, así como en pacientes que rehúsen la cirugía, **la radioterapia supone el tratamiento alternativo radical a la cirugía**:

- SBRT
  - T1-T2 y T3 por pared torácica
  - Tamaño global  $\leq 5$  cm
  - Biopsia positiva
  - PS 0-2
  - PET-TC que descarte enfermedad a otros niveles.
  - FEV1  $> 35-40\%$
- RTE régimen hipofraccionado = En pacientes no candidatos a SBRT.
- RTE paliativa

#### Tratamientos adyuvantes en estadios I y II

- **RADIOTERAPIA** (Ver apartado 4.1).
- **QUIMIOTERAPIA**:
  - Estadios II, con resección R0 y PS 0-2.

- Se recomienda su inicio no más allá de las 6 semanas desde la cirugía siempre que la situación basal y recuperación postoperatoria del paciente lo permitan.
- 4 ciclos de doblete basado en cisplatino: **CDDP + VINOELBINA** (1 ciclo c/21 días).
  - CDDP 75 mg/m<sup>2</sup> iv D1
  - Vinorelbina 25 mg/m<sup>2</sup> iv D1 y Vinorelbina 60 mg/m<sup>2</sup> vo D8

#### IV.2. Estadío IIIA resecable

Aunque se trata de un grupo muy heterogéneo, sí sabemos que todos los subgrupos se acaban beneficiando de un manejo multidisciplinar y terapéutico que incluya cirugía, quimioterapia y radioterapia.

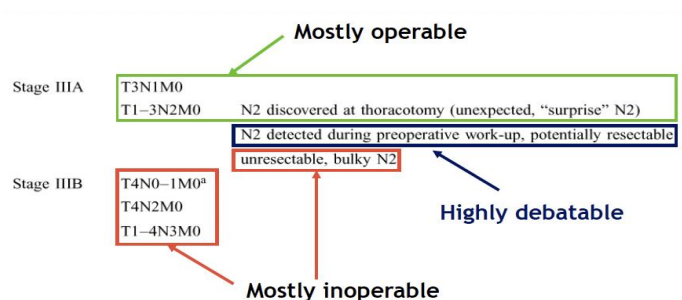

##### A. IIIA Clínico

- cN0-N1 → Cirugía radical + LND sistemática
- cN2 → Definir resecabilidad por ausencia de *enfermedad bulky mediastínica*, definida ésta por:
  - Tamaño del ganglio > 2 cm en el diámetro menor.
  - Varias adenopatías agrupadas, aunque de pequeño tamaño, o existen más de dos estaciones ganglionares afectas.

De definirse como enfermedad N2 potencialmente resecable, podemos optar por 2 estrategias de tratamiento, siempre valoradas y definidas estas en el comité:

- ✓ **Cirugía radical + LND sistemática.**
- ✓ **QT neoadyuvante y posterior cirugía radical + LND sistemática.** Se aplicarían 3 ciclos de quimioterapia y posterior valoración de cirugía en CMT.

##### REGÍMENES DE ELECCIÓN, a decidir según características clínicas

- CDDP 80 mg/m<sup>2</sup> iv D1

Vinorelbina 25 mg/m<sup>2</sup> iv D1 y 60 mg/m<sup>2</sup> vo D8 (1 ciclo c/21 días)

- CDDP 80 mg/m<sup>2</sup> iv D1 y D8

Gemcitabina 1250 mg/m<sup>2</sup> iv D1 y D8 (1 ciclo c/21 días), con mayor actividad por tasa de respuesta en histología escamosa.

- CBDCA AUC 6 iv D1

Paclitaxel 200 mg/m<sup>2</sup> D1 (1 ciclo c/21 días) en pacientes con contraindicación para cisplatino.

## Carcinoma de pulmón no microcítico (CPNCP)

En los pacientes cN0-1 y cN2 resecables que rehúsen la cirugía o bien aun siendo potencialmente resecable la enfermedad no son operables, se debe ofrecer **tratamiento de QT-RT concomitante radical** que no debe superar las 7 semanas de tratamiento y valorando únicamente la cirugía a *posteriori* en pacientes **muy seleccionados** (respuesta parcial mayor > 50%, PS 0, no comorbilidades, cirugía limitada por lobectomía/segmentectomía o resección en manguito). Esquemas de quimioterapia en concomitancia:

- **De elección:**

CDDP 80 mg/m<sup>2</sup> iv D1 y D22

Vinorelbina 15 mg/m<sup>2</sup> D1, D8, D22 y D29

RT 60-66 Gy en 30-33 fracciones diarias.

- Para pacientes con **contraindicación para cisplatino:**

CBDCA AUC 2 iv D1

Paclitaxel 45 mg/m<sup>2</sup> iv D1 (semanal, durante 6 semanas)

RT 60-66 Gy en 30-33 fracciones diarias.

- Pacientes con **histología de neuroendocrino de células grandes:**

CDDP 50 mg/m<sup>2</sup> iv D1, D8, 29 y D36

Etopósido 50 mg/m<sup>2</sup> iv D1-5 y D29-33

RT 60-66 Gy en 30-33 fracciones diarias.

**B. IIIAN2 Intraoperatorio** = Continuar con procedimiento quirúrgico y aplicar los tratamientos adyuvantes pertinentes.

**C. IIIA Post-quirúrgico**

- pN0-N1
  - Márgenes quirúrgicos no afectos = Quimioterapia adyuvante
  - Márgenes quirúrgicos afectos = Quimioterapia adyuvante seguida de Radioterapia adyuvante.
- pN2 → Valorar Radioterapia adyuvante, especialmente si no candidato para tratamiento de quimioterapia adyuvante.

### IV.3. Estadios IIIA irresecables, IIIB y IIIC

El tratamiento de elección es QT-RT concomitante radical, con los esquemas previamente expuestos (*ver apartado IV.2.A*). La propuesta de este tratamiento vendrá dada tras la valoración en comité. Si la valoración por Oncología Médica precede a la valoración por O. Radioterápica, realizar HIC a dicho servicio para definir concomitancia vs secuencial en función de una serie de criterios establecidos para ello, que dependerán de *PS, pruebas de función respiratoria y criterios dosimétricos*.



## Carcinoma de pulmón no microcítico (CPNCP)

| BAJO RIESGO                                                                                     | RIESGO INTERMEDIO                                                                                                    | ALTO RIESGO                                                                                                                     |
|-------------------------------------------------------------------------------------------------|----------------------------------------------------------------------------------------------------------------------|---------------------------------------------------------------------------------------------------------------------------------|
| PS 0-1<br>Sin comorbilidades<br>Edad < 70 años<br>Buen test funcional respiratorio<br>V20 < 35% | PS 0-1<br>Disfunción orgánica leve/moderada<br>Edad < 80 años<br>Aceptable test funcional respiratorio<br>V20 35-45% | PS ≥ 2<br>Disfunción orgánica moderada/grave<br>Cualquier edad<br>Test funcional respiratorio severamente afectado<br>V20 > 45% |
| QT-RT CONCOMITANTE                                                                              | QT-RT SECUENCIAL                                                                                                     | RT PALIATIVA                                                                                                                    |

De desestimarse tratamiento concomitante por dichos criterios, se realizará tratamiento de QT-RT secuencial, valorando los siguientes esquemas, a decidir según características clínicas:

- CDDP 80 mg/m<sup>2</sup> iv D1 y D8 + Gemcitabina 1250 mg/m<sup>2</sup> iv días 1 y 8 (1 ciclo c/21 días) en **histología escamosa**
- CDDP 80 mg/m<sup>2</sup> + Vinorelbina 25 mg/m<sup>2</sup> iv D1 y 35 mg/m<sup>2</sup> D8 (1 ciclo c/21 días)
- CBDCA AUC 6 IV D1 + Paclitaxel 200 mg/m<sup>2</sup> iv D1 (1 ciclo c/21 días) para **pacientes con contraindicación para cisplatino.**

Tras 3 ciclos de quimioterapia, repetir TC y, si no hay progresión, aplicar tratamiento de radioterapia.

**\*\*En aquellos pacientes que hayan recibido tratamiento QT-RT concomitante y que no hayan progresado en curso o en primera evaluación tras el tratamiento, y PDL1 > 1% y mantengan ECOG 0-1, se administrará tratamiento posterior con DURVALUMAB en monoterapia por 1 año (ESMO MCBS v1.1 = A).**

#### IV.4. ESTADIO IV

El tratamiento vendrá determinado por:

- Histología
- Resultado de determinaciones moleculares para EGFR, ALK, ROS1, BRAF<sup>V600E</sup> y positividad de PD-L1.
- PS, comorbilidades y preferencias del paciente.

##### IV.4.1. PRIMERA LÍNEA EGFR/ALK WILD-TYPE

###### A. Histología no escamoso

- **Pembrolizumab 200 mg iv D1 + combinación de platino-pemetrexed**, 4 ciclos (D1 ciclo c/21 días), con mantenimiento de pembrolizumab 200 mg D1 hasta un total de 35 ciclos y Pemetrexed 500 mg IV D1 cada 3 semanas, este último hasta progresión de enfermedad o toxicidad inaceptable (**ESMO-MCBS v1.1 = 4**)
  - Cualquier expresión de PD-L1
  - PS 0-1
  - Si toma crónica de corticoides la dosis total debe ser de Prednisona < 10 mg o equivalente
- **Pembrolizumab 200 mg iv cada 3 semanas**, hasta progresión o toxicidad inaceptable. (**ESMO-MCBS v1.1 = 5**)

- Expresión (TPS) de PD-L1  $\geq 50\%$
- PS 0-1
- Si toma crónica de corticoides la dosis total debe ser de Prednisona  $< 10$  mg o equivalente.
- **Quimioterapia en combinación basada en platino junto a un agente de 3ª generación.** 4 ciclos y posterior terapia de mantenimiento. Considerar máximo 6 ciclos en aquellos pacientes unfit para mantenimiento o que lo rechacen.
  - Pacientes sin grandes comorbilidades
  - PS 0-1
  - Contraindicación o *unfit* para inmunoterapia.

Esquemas:

- CDDP\* 75 mg/m<sup>2</sup> iv D1 + Permetrexed\*\* 500 mg/m<sup>2</sup> iv D1 (1 ciclo c/21 días). Tras 4 ciclos, si no existe progresión (enfermedad estable o respuesta parcial) continuar con permetrexed 500 mg/m<sup>2</sup> iv D1 c/21 días como mantenimiento hasta progresión de enfermedad o toxicidad inaceptable. **Este esquema debe ser el considerado en primer lugar sobre los restantes.**
- CBDCA AUC 5-6 iv D1 + Paclitaxel 175 mg/m<sup>2</sup> iv D1 + Bevacizumab 7,5 mg/kg D1 (1 ciclo c/21 días); (**ESMO-MCBS v1.1 = 2**)

*\*En pacientes no candidatos a recibir QT con cisplatino, sustituir cisplatino por carboplatino AUC 5.*

*\*\*Premedicación para pemetrexed:*

- OPTOVITE (VitB12) 1000 UI 1 vial IM cada 9 semanas con la primera dosis la semana previa al inicio de tratamiento
- ACFOL (ac. Fólico 5 mg) 1 comp/día comenzando 7 días previo al inicio del tratamiento
- 4 mg/12 horas días -1, 0 y +1

#### B. Carcinoma escamoso

- **Pembrolizumab 200 mg iv cada 3 semanas**, hasta progresión o toxicidad inaceptable. (**ESMO-MCBS v1.1 = 5**)
  - TPS PD-L1  $\geq 50\%$
  - PS 0-1
  - Si toma crónica de corticoides la dosis total debe ser de Prednisona  $< 10$  mg o equivalente.
- **Quimioterapia en combinación basada en platino junto a un agente de 3ª generación**, para pacientes sin grandes comorbilidades y PS 0-2. Se recomiendan 4 ciclos, 6 como máximo:
  - CDDP\* 75 mg/m<sup>2</sup> iv D1 + Gemcitabina 1250 mg/m<sup>2</sup> iv D1 y D8 (1 ciclo c/21 días). **Este esquema debe ser el considerado en primer lugar sobre los restantes.**
  - CBDCA AUC 5-6 iv D1 + Paclitaxel 175 mg/m<sup>2</sup> iv D1 para pacientes con contraindicación a cisplatino

*\*En pacientes no candidatos a recibir QT con cisplatino, sustituir cisplatino por carboplatino AUC 5.*

### C. Pacientes con PS > 2 y/o ancianos

- PS 3 - 4 = cuidados paliativos.
- PS 2 = En pacientes muy seleccionados, seguir las recomendaciones anteriormente expuestas para pacientes con PS 0-1 en cada una de las histologías. Si disfunción orgánica moderada, comorbilidades y PS 2, tratamiento en monoterapia considerando alguno de los siguientes esquemas:
  - Vinorelbina: 25 mg/m<sup>2</sup> IV semanal
  - Vinorelbina oral: 60 mg/m<sup>2</sup> semanal x 3 semanas, seguida de 80 mg/m<sup>2</sup> semanal si no ha habido toxicidad inaceptable
  - Gemcitabina: 1.000–1.200 mg/m<sup>2</sup> D1 y 8 (c/21d)
  - Docetaxel: 75 mg/m<sup>2</sup> (1 ciclo c/21d)
  - Docetaxel: 36 mg/m<sup>2</sup> semanal
- ANCIANOS = Muy recomendable la realización de una valoración geriátrica global (CGA).
  - < 70 años y PS 2 con disfunción orgánica leve o ausente = Doblete de quimioterapia basada en carboplatino (4-6 ciclos)
  - ≥ 70 años y PS 0-1 con disfunción orgánica leve o ausente = Doblete de quimioterapia basada en carboplatino (4-6 ciclos)
  - ≥ 70 años y PS 2 disfunción orgánica moderada, comorbilidades = tratamiento en monoterapia considerando alguno de los esquemas expuestos previamente.
  - PS 3 - 4 = Cuidados paliativos.

## IV.4.2. SEGUNDA LÍNEA EGFR/ALK WILD-TYPE

### A. Histología no escamoso

- **Nivolumab 240 mg iv cada 2 semanas** hasta progresión de la enfermedad o toxicidad inaceptable. Beneficio global independientemente del valor de expresión de PD-L1, pero preferible su indicación para pacientes con PD-L1 ≥ 1%. (ESMO-MCBS v1.1 = 5).
  - Pacientes con PS 0-1.
  - Si toma crónica de corticoides, dosis total < Prednisona 10 mg o equivalente.
- **Pembrolizumab 2 mg/kg iv cada 3 semanas.** Hasta progresión de la enfermedad o toxicidad inaceptable. (ESMO-MCBS v 1.1 = 5)
  - TPS PD-L1 ≥ 1%.
  - Pacientes con PS 0-1.
  - Si toma crónica de corticoides la dosis total debe ser de Prednisona < 10 mg o equivalente.
- **Atezolizumab 1200 mg iv cada 3 semanas.** Hasta progresión de la enfermedad o toxicidad inaceptable. (ESMO-MCBS v 1.1 = 5)
  - Cualquier nivel de expresión de PD-L1

- Pacientes con PS 0-1
- Si toma crónica de corticoides la dosis total debe ser de Prednisona < 10 mg o equivalente.
- Valorar sobre las anteriores en pacientes con antecedentes de radioterapia torácica y neumonitis radica (menor riesgo de neumonitis inmunorelacionada).
- **Quimioterapia en combinación basada en platino junto a un agente de 3º generación**, para pacientes sin grandes comorbilidades y PS 0-2, que hayan progresado a tratamiento de inmunoterapia con pembrolizumab.
- **Docetaxel 75 mg/m<sup>2</sup> iv D1 + Nintedanib**, en pacientes con rápida progresión a la 1ª línea de tratamiento de quimioterapia (dentro de los primeros 9 meses de tratamiento) en pacientes no aptos para inmunoterapia de segunda línea. (**ESMO-MCBS v1.1 = 4** únicamente para este subgrupo de pacientes).
- **Docetaxel 75 mg/m<sup>2</sup> iv D1** (1 ciclo c/21 días) en monoterapia hasta progresión o toxicidad inaceptable para pacientes con PS 0-2 con contraindicación/progresión a inmunoterapia, no candidatos o con contraindicación para Nintedanib y *unfit* para doblete de quimioterapia.

#### B. Carcinoma escamoso

- **Nivolumab 240 mg/kg iv cada 2 semanas** hasta progresión de la enfermedad o toxicidad inaceptable. (**ESMO-MCBS v1.1 = 5**)
  - Cualquier nivel de expresión de PD-L1
  - Pacientes con PS 0-1
  - Si toma crónica de corticoides, dosis total < Prednisona 10 mg o equivalente.
- **Pembrolizumab 2 mg/kg iv cada 3 semanas**. Hasta progresión de la enfermedad o toxicidad inaceptable. (**ESMO-MCBS v1.1 = 5**)
  - TPS PD-L1  $\geq 1\%$ .
  - Pacientes con PS 0-1
  - Si toma crónica de corticoides la dosis total debe ser de Prednisona < 10 mg o equivalente.
- **Atezolizumab 1200 mg iv cada 3 semanas**. Hasta progresión de la enfermedad o toxicidad inaceptable. (**ESMO-MCBS v1.1 = 5**)
  - Cualquier nivel de expresión de PD-L1
  - Pacientes con PS 0-1
  - Si toma crónica de corticoides la dosis total debe ser de Prednisona < 10 mg o equivalente.
  - Valorar sobre las anteriores en pacientes con antecedentes de radioterapia torácica.
- **Quimioterapia en combinación basada en platino junto a un agente de 3º generación**, para pacientes sin grandes comorbilidades y PS 0-2, que hayan progresado a tratamiento de inmunoterapia con pembrolizumab (*ver apartado 1ª línea*).
- **Docetaxel 75 mg/m<sup>2</sup> iv D1** (1 ciclo c/21 días) en monoterapia hasta progresión o toxicidad inaceptable, para pacientes con PS 0-2 con contraindicación/progresión a inmunoterapia y *unfit* para doblete.

## IV.4.3. ENFERMEDAD EGFR

| MUTACIONES SENSIBLES                                                                                                                                                                                                                                                                                                                                  | MUTACIONES DE RESISTENCIA PRIMARIA                                                                                                             | MUTACIONES DE RESISTENCIA ADQUIRIDA                                 |
|-------------------------------------------------------------------------------------------------------------------------------------------------------------------------------------------------------------------------------------------------------------------------------------------------------------------------------------------------------|------------------------------------------------------------------------------------------------------------------------------------------------|---------------------------------------------------------------------|
| <ul style="list-style-type: none"> <li>• <u>Mutaciones activadoras “clásicas”</u> (90%) <ul style="list-style-type: none"> <li>Delecciones exón 19</li> <li>L858R del exón 21</li> </ul> </li> <li>• <u>Otras</u> (menos frecuentes) <ul style="list-style-type: none"> <li>G719A/S en el exón 18</li> <li>L861X en el exón 21</li> </ul> </li> </ul> | <ul style="list-style-type: none"> <li>• T854 (exón 21)</li> <li>• L747S (exón 19)</li> <li>• D761Y exón 19)</li> <li>• Ins exón 20</li> </ul> | <ul style="list-style-type: none"> <li>• T790M (exón 20)</li> </ul> |

A. Primera línea

Ofrecer tratamiento a pacientes con PS 0 hasta 3, PS 4 si es por carga tumoral y mutaciones de sensibilidad (*delección exón 19 o mutación L858R del exón 21*).

- **Erlotinib**<sup>1</sup> 150 mg/día hasta progresión o toxicidad inaceptable. (ESMO-MCBS v1.1 = 4)
- **Gefitinib**<sup>1</sup> 250 mg/día hasta progresión o toxicidad inaceptable. (ESMO-MCBS v1.1 = 4)
- **Afatinib**<sup>2</sup> 40 mg/día hasta progresión o toxicidad inaceptable, en pacientes con la mutación en exón 19 (*del19*). (ESMO-MCBS v1.1 = 4)
- **Osimertinib**<sup>3</sup> 80 mg/día hasta progresión o toxicidad inaceptable. (ESMO-MCBS v1.1 = 4)

<sup>1</sup>ITK 1ª generación

<sup>2</sup>ITK 2ª generación irreversible

<sup>3</sup>ITK 3ª generación irreversible

B. Segunda línea

- Si oligoprogresión (progresión radiológica y en una sola localización) = tratamiento local sobre la lesión no controlada (cirugía y/o radioterapia) y continuar con el TKI.
- De tratarse de una progresión sistémica clara: BIOPSIA LÍQUIDA +/- BIOPSIA TISULAR.
  - Mutación exón 20 T790M positiva en biopsia líquida = **Osimertinib** 80 mg/día hasta progresión o toxicidad inaceptable. (ESMO-MCBS v1.1 = 4)
  - Mutación exón 20 T790M negativa en biopsia líquida = realizar biopsia sólida y si esta es positiva, **Osimertinib** 80 mg/día hasta progresión o toxicidad inaceptable. (ESMO-MCBS v1.1 = 4)
  - Mutación exón 20 T790M negativa en biopsia líquida y sólida, o no posibilidad de re-biopsia tisular = **Quimioterapia en combinación basada en platino** hasta progresión o toxicidad inaceptable.

C. Tercera línea

- Quimioterapia en combinación basada en platino o en monoterapia.

## IV.4.4. ENFERMEDAD ALK

A. Primera línea

Ofrecer tratamiento a pacientes con PS 0 hasta 3, PS 4 si es por carga tumoral:

- **De elección** → **Alectinib** 600 mg vía oral cada 12 horas, hasta progresión o toxicidad inaceptable. Se debe administrar con comida. (ESMO-MCBS v1.1 = 4.)

## B. Segunda línea

- Si oligoprogresión (progresión radiológica y en una sola localización), tratamiento local sobre la lesión no controlada (cirugía y/o radioterapia) y continuar con el TKI. De tratarse de una progresión sistémica clara:
  - Rebiopsia (recomendable, pero no mandatorio).
  - **Crizotinib** 250 mg vía oral cada 12 horas hasta progresión o toxicidad inaceptable, si no lo han recibido en primera línea.
  - **Ceritinib** 450 mg vía oral cada 24 horas, hasta progresión o toxicidad inaceptable, tras progresión a crizotinib. (ESMO-MCBS v1.1 = 4)
  - **Alectinib** 600 mg vía oral cada 12 horas, hasta progresión o toxicidad inaceptable, si no lo han recibido en primera línea y tras progresión a crizotinib. (ESMO-MCBS v1.1 = 4)
  - Quimioterapia en combinación basada en platino si PS 0-1.
  - Quimioterapia en monoterapia si PS 2.
  - Cuidados paliativos si PS 3-4.

## IV.4.5. ENFERMEDAD BRAF

### A. Primera línea

Ofrecer tratamiento a pacientes con PS 0-2, portadores de la mutación en BRAF<sup>V600E</sup>

- **Dabrafenib 150 mg/12 horas + Trametinib 2 mg 1 comp cada 12 horas** hasta progresión o toxicidad inaceptable. (ESMO-MCBS v1.1 = 2)
- Quimioterapia basada en platino si PS 0-1
- Quimioterapia en monoterapia si PS 2.
- Cuidados paliativos si PS 3-4.

### B. Segunda línea

- Si oligoprogresión (progresión radiológica y en una sola localización), tratamiento local sobre la lesión no controlada (cirugía y/o radioterapia) y continuar con el TKI. De tratarse de una progresión sistémica clara:
  - Quimioterapia basada en platino si PS 0-1
  - Quimioterapia en monoterapia si PS 2.
  - Cuidados paliativos si PS 3-4.
  - **Dabrafenib 150 mg/12 horas + Trametinib 2 mg 1 comp cada 12 horas** hasta progresión o toxicidad inaceptable, si no lo ha recibido previamente. (ESMO-MCBS v1.1 = 2)

## IV.4.6. ENFERMEDAD ROS1

### A. Primera línea

Ofrecer tratamiento a pacientes con PS 0-3, portadores de la translocación de ROS1.

- De elección: **Crizotinib** 250 mg vía oral cada 12 horas hasta progresión o toxicidad inaceptable.  
**ESMO-MCBS v1.1 = 3**
- Quimioterapia basada en platino si PS 0-1
- Quimioterapia en monoterapia si PS 2.

- Cuidados paliativos si PS 3-4.

#### B. Segunda línea

- Si oligoprogresión (progresión radiológica y en una sola localización), tratamiento local sobre la lesión no controlada (cirugía y/o radioterapia) y continuar con el TKI. De tratarse de una progresión sistémica clara:
  - Rebiopsia si tratamiento con crizotinib previo.
  - **Crizotinib** 250 mg vía oral cada 12 horas hasta progresión o toxicidad inaceptable, si no lo han recibido en primera línea. **ESMO-MCBS v1.1 = 3**
  - Quimioterapia basada en platino si PS 0-1
  - Quimioterapia en monoterapia si PS 2.
  - Cuidados paliativos si PS 3-4.

#### IV.4.7. ENFERMEDAD OLIGOMETASTÁSICA

El objetivo es tratar la enfermedad oligometastásica en el CPNCP con el fin de distinguir un grupo de pacientes con lesiones sincrónicas o metacrónicas que pueden sobrevivir largo tiempo después de un tratamiento local de la lesión primaria y sus metástasis asociado o no a un tratamiento sistémico. Se denomina oligometástasis cuando existen entre 1-5 metástasis, en 1 o 2 órganos, o lesión recurrente que pudiera ser tratado con terapias locales (*cirugía, radioterapia y ablación por radiofrecuencia*). Esta misma idea ya ha sido incorporada a la 8ª clasificación TNM del cáncer de pulmón que diferencia una nueva categoría, M1b, correspondiente a la enfermedad oligometastásica extratorácica, diferente a la categoría M1c que incluye a los pacientes con lesiones a distancia múltiples. Se acepta que la etapa oligometastásica puede ocurrir en un número de situaciones clínicas distintas y que apenas se encuentra un ensayo controlado aleatorizado que ponga un proceder terapéutico por encima de otro, habiendo muchas opciones de tratamiento potenciales para el cáncer de pulmón no microcítico oligometastásico (CPNCP). **El uso de la de terapia sistémica de inicio puede permitir la selección óptima de los pacientes que no tendrán una rápida progresión sistémica tras el inicio de dicho tratamiento, y posteriormente éstos, podrán ser candidatos a una terapia de consolidación definitiva (cirugía y/o radioterapia).**

#### IV.4.8. TRATAMIENTO DE SOPORTE PALIATIVO

La inclusión temprana, previa al deterioro clínico, en cuidados paliativos de pacientes con cáncer de pulmón no microcítico estadio IV ha demostrado ser más beneficiosa para el control de síntomas y calidad de vida de los pacientes.

##### A. Metástasis Cerebrales

Emplear el índice pronóstico RPA (*Recursive Partitioning Analysis*) de la RTOG:

| CLASE I                                                                                               | CLASE II                                                                                                                         | CLASE III                         |
|-------------------------------------------------------------------------------------------------------|----------------------------------------------------------------------------------------------------------------------------------|-----------------------------------|
| KPS $\geq$ 70, y<br>Edad < 65 años, y<br>Tumor primario controlado, y<br>No metástasis extracraneales | KPS $\geq$ 70, y uno o más de los siguientes:<br>Edad $\geq$ 65 años, tumor primario no controlado, y metástasis extracraneales. | KPS < 70                          |
| <i>Median survival 7,1 months</i>                                                                     | <i>Median survival 4,2 months</i>                                                                                                | <i>Median survival 2,1 months</i> |

- Cuidados paliativos = RPA clase III, GPA 0-1
- Radiocirugía =  $\leq 3$  metástasis o suma total  $< 3$  cm con RPA clase I y II,
- RT holocraneal =  $> 3$  metástasis cerebrales en pacientes no seleccionados/*unfit* con RPA clase I y II.

En pacientes asintomáticos (sin síntomas clínicos y/o sin tratamiento corticoideo para su control) para los que aún no se ha iniciado terapia sistémica (QT, TKI) valorar tratamiento sistémico de entrada y RT holocraneal diferida. Además, en estos pacientes asintomáticos, no se recomienda el uso “profiláctico” de corticoides.

#### B. Metástasis Óseas

- RT paliativa antiálgica
- Ac. zolendronico = 4 mg IV cada 21-28 días con suplementación de Calcio/VitD.

### **V. SEGUIMIENTO**

Tras tratamiento con intención curativa:

- Tratamiento de radioterapia radical exclusiva, SBRT o QT-RT
  - 1º-3º año: TAC tórax cada 6 meses y exp. física; analítica opcional.
  - A partir del 4º año: Exp. física y TAC tórax anual
  - *PET-TC +/- biopsia si sospecha de recurrencia locorregional en TAC.*
- Tratamiento quirúrgico:
  - 1-2º año: Exp. física y TAC tórax cada 6 meses.
  - A partir del 3º año: Exp. física y TAC tórax anual

En el seguimiento de la enfermedad metastásica = control con TAC cada 8-10 semanas.



## Mesotelioma

### I. DIAGNÓSTICO y ESTADIFICACIÓN

- **Diagnostico histopatológico.** Existen 3 subtipos histológicos con diferencias pronósticas: *epiteloide* (mejor pronóstico), *bifásico* y *sarcomatoide*. La batería de inmunohistoquímica incluirá calretinina, citokeratina 5/6, WT1 y podoplanina, con negatividad de CEA, EpCAM y TTF1.
- **Historia clínica completa** con historial epidemiológico y ocupacional.
- **Exploración física.**
- **Análítica completa con hemograma y bioquímica.**
- **Radiografía de tórax pósterio-anterior y lateral.**
- **TC tórax y abdomen superior.**
- **Videotoracoscopia (VATS)** para toma de biopsias, estadiaje locorregional y evacuación de derrame pleural de existir. Se recomienda toma de biopsia de tejido normal y anormal macroscópicamente.
- **BAG guiada por US** cuando la VATS esta contraindicada o no es factible.
- **Pruebas de función respiratoria**, incluyendo DLCO si opción de tratamiento quirúrgico.
- **RM con contraste de tórax** si tumor operable para planificación quirúrgica y para descartar afectación focal de diafragma, pericardio o pared torácica.
- Otras:
  - **GGO:** en casos seleccionados por clínica sospechosa, o elevación de calcio y/o fosfatasa alcalina no explicadas por otras causas.
  - **TC o RM cráneo con contraste:** en casos seleccionados por clínica sospechosa y en estadios III candidatos a tratamiento quirúrgico agresivo.
- Estadificación según la clasificación TNM (1995) validada por IMIG/UICC.

### II. TRATAMIENTO

#### II.1. CIRUGÍA

- VATS con objeto de estadiaje y paliación cuando con el drenaje pleural habitual no es suficiente.
- Tras evaluación en comité multidisciplinar con intención radical, sabiendo que la obtención de márgenes libres es virtualmente imposible y el objetivo debe ser obtener resección macroscópicamente completa. La IASLC establece 2 aprovechamientos quirúrgicos:
  - **Neumonectomía extrapleural (EPP)** = Resección completa en bloque de la pleural parietal y visceral junto al pulmón ipsilateral, pudiendo resecar también de ser requerido diafragma y pericardio.
  - **Decorticación o pleurectomía extendida** = Igual procedimiento a nivel de pleura, pero sin resecar el pulmón, así como tampoco pericardio o diafragma.

## II.2 TRATAMIENTO ADYUVANTE

En estadios I-III tras resección quirúrgica, empleando esquema CDDP + Pemetrexed.

Se valorará la adición de radioterapia adyuvante para los pacientes que han conseguido una citorreducción quirúrgica máxima.

## II.3 TRATAMIENTO PALIATIVO

Los pacientes asintomáticos con baja carga tumoral que no sean candidatos a cirugía radical pueden ser seguidos sin tratamiento hasta inicio de síntomas.

La quimioterapia es el tratamiento de elección en aquellos pacientes con enfermedad irresecable o metastásica de inicio. A valorar en pacientes con PS 0-1 y en pacientes seleccionados con PS 2:

- **Primera línea**

- **CDDP + Pemetrexed**, 1 ciclo c/21 días por un total de 6 ciclos. Tras 3 ciclos, realizar evaluación radiológica y si hay una respuesta o estabilización se efectuarán 3 ciclos más de quimioterapia. No se administrará mantenimiento con pemetrexed.

Pemetrexed 500 mg/m<sup>2</sup> iv D1

CDDP 75 mg/m<sup>2</sup> iv D1.

*\*La semana previa al inicio de tratamiento, deberá iniciar VitB12 1000 UI 1 ia im cada 9 semana + Acfol<sup>®</sup> 5 mg/24 horas + Dexametasona 4 mg/12 horas días -1, 0 y +1.*

*\*\*Aquellos pacientes con ClCr <50 ml/min se debe valorar la administración de Carboplatino AUC 5 en lugar de CDDP.*

En pacientes con PS 2 puede valorarse la monoterapia con pemetrexed por 6 ciclos.

- **Segunda línea**

No hay un tratamiento estándar. Se valorará repetir mismo esquema de tratamiento en función del TTP, edad, PS, comorbilidades y disponibilidad de ensayo clínico, *versus* cuidados de soporte únicamente. En caso de considerarse indicado, la administración de vinorelbina es una opción.

## II.4. RADIOTERAPIA

Valorar su utilización con intención paliativa para control de síntomas.

## Cáncer de mama

### I. DIAGNÓSTICO

Todas las pacientes deben tener al diagnóstico:

- Historia y exploración física completa.
- Hemograma y bioquímica sanguínea.
- Rx tórax PA y L.
- Mamografía bilateral.
- Ecografía axilar.
- RM (si la sospecha de multicentricidad y/o multifocalidad puede condicionar el tratamiento quirúrgico (conservador vs mastectomía)). Todas las lesiones sospechosas por RM deberán ser biopsiadas para decidir el tratamiento quirúrgico.
- TAC torácico-abdominal (si estadios III - IV).
- Gammagrafía ósea (si estadios III - IV).
- Biopsia de la lesión con evaluación histológica e inmunohistoquímica completa (incluyendo RE y RP con % de células teñidas), HER2 (Herceptest® o FISH), índice Ki67, presencia o no de invasión linfovascular).
- Test embarazo.
- Ecocardiograma basal, si indicación de antiHER2.
- Considerar preservación de fertilidad si indicado.

### II. TRATAMIENTO ENFERMEDAD LOCALIZADA

#### II.1. CONSIDERAR SIEMPRE INCLUSIÓN EN ENSAYO CLÍNICO

#### II.2. TRATAMIENTO DEL CARCINOMA IN SITU

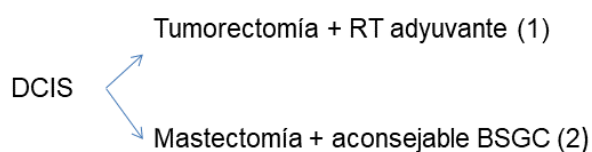

LCIS → Tumorectomía

Enfermedad de Paget → Cirugía de la neoplasia asociada (DCIS o CDI) incluyendo complejo areola-pezones

(1) Puede valorarse no administrar RT adyuvante en: DCIS con márgenes >1 cm, >60 años, tamaño tumoral <1.5 cm e histología de buen pronóstico.

(2) Si tumores multicéntricos, DCIS extenso o difuso, no posibilidad de márgenes libres, no posibilidad de RT adyuvante. En estos casos es aconsejable realizar BSGC.

### II.3. TRATAMIENTO QUIRÚRGICO REGIONAL

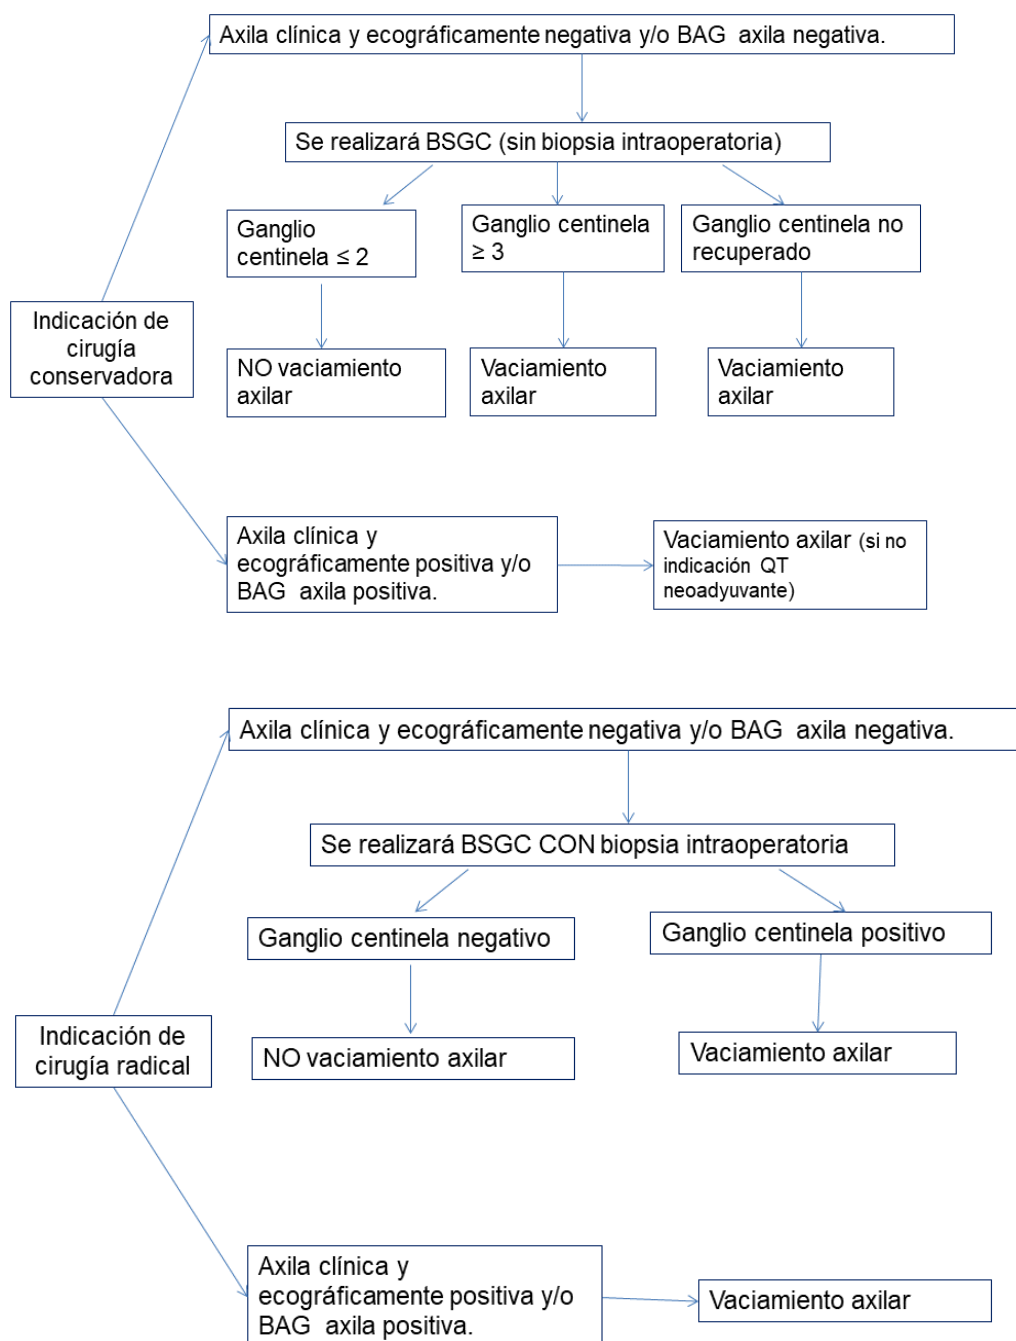

## II.4. TRATAMIENTO SISTÉMICO ADYUVANTE

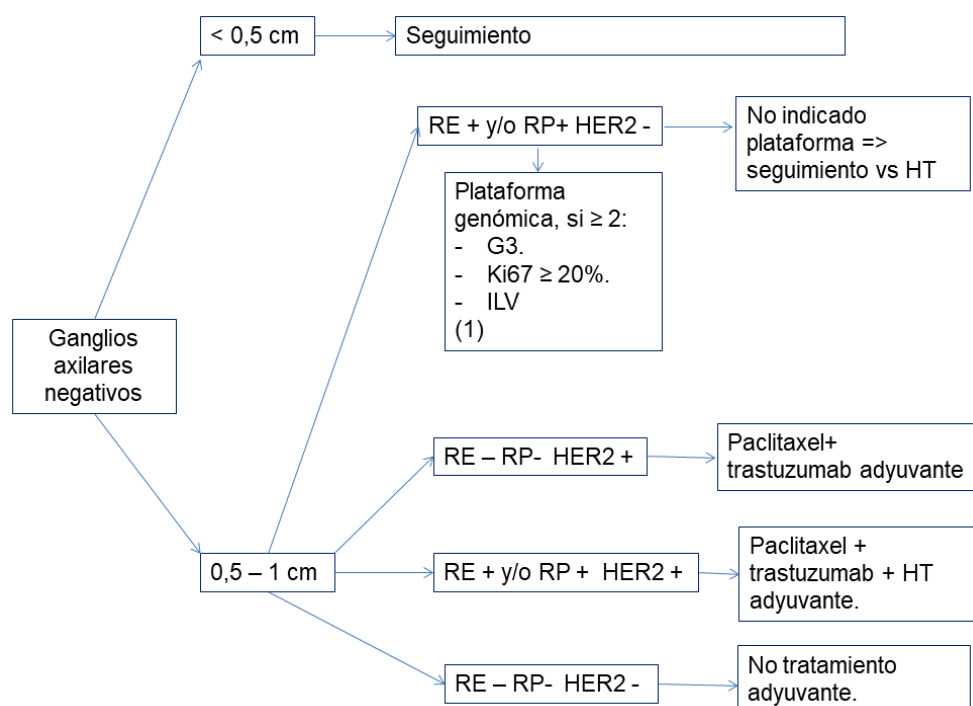

(1)Según PROSIGNA:

Bajo riesgo: HT.

Riesgo intermedio: HT +/- QT según ROR individual a 10 años.

Riesgo individual de recidiva a distancia a 10 años  $\geq 15\%$  (riesgo intermedio alto y alto riesgo): QT + HT.

Según ONCOTYPE (indicado siempre en  $\leq 50$  años y tumores  $\leq 3$  cm):

Score  $< 15$ : HT.

Score 15 – 20: HT y valorar QT.

Score  $\geq 21$ : QT + HT.

(NOTA) Pautas de QT, HT y trastuzumab en tablas 1 y 2.

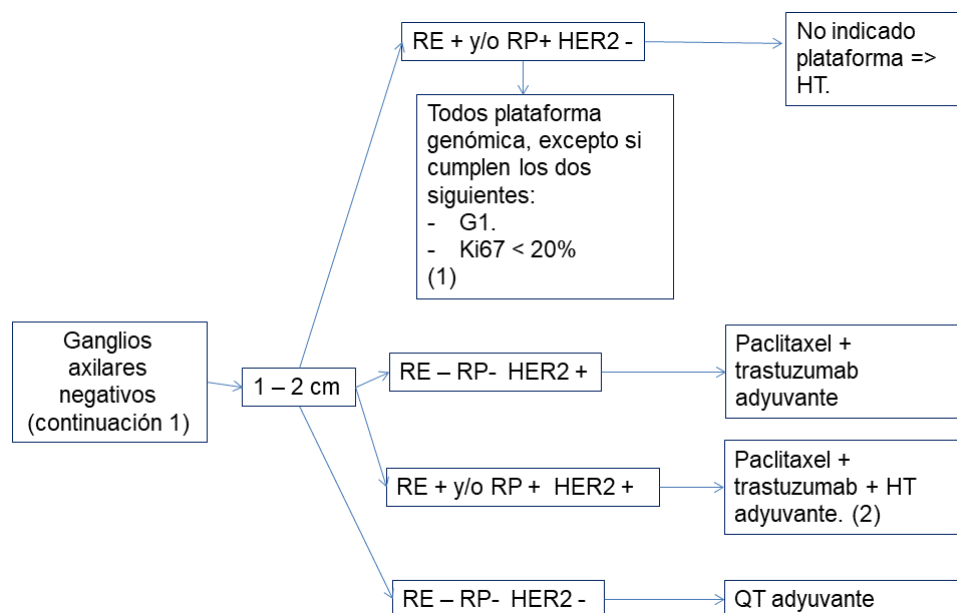

## (1)Según PROSIGNA:

Bajo riesgo: HT.

Riesgo intermedio: HT +/- QT según ROR individual a 10 años.

Riesgo individual de recidiva a distancia a 10 años  $\geq 15\%$  (riesgo intermedio alto y alto riesgo): QT + HT.

Según ONCOTYPE (indicado siempre en  $\leq 50$  años y tumores  $\leq 3$  cm):

Score  $< 15$ : HT.

Score 15 – 20: HT y valorar QT.

Score  $\geq 21$ : QT + HT.

(2)  $>70$  años: Hormonoterapia adyuvante. Valorar indicación de tratamiento como en pacientes  $\leq 70$  años según estado general y comorbilidades.

(NOTA) Pautas de QT, HT y trastuzumab en tablas 1 y 2.

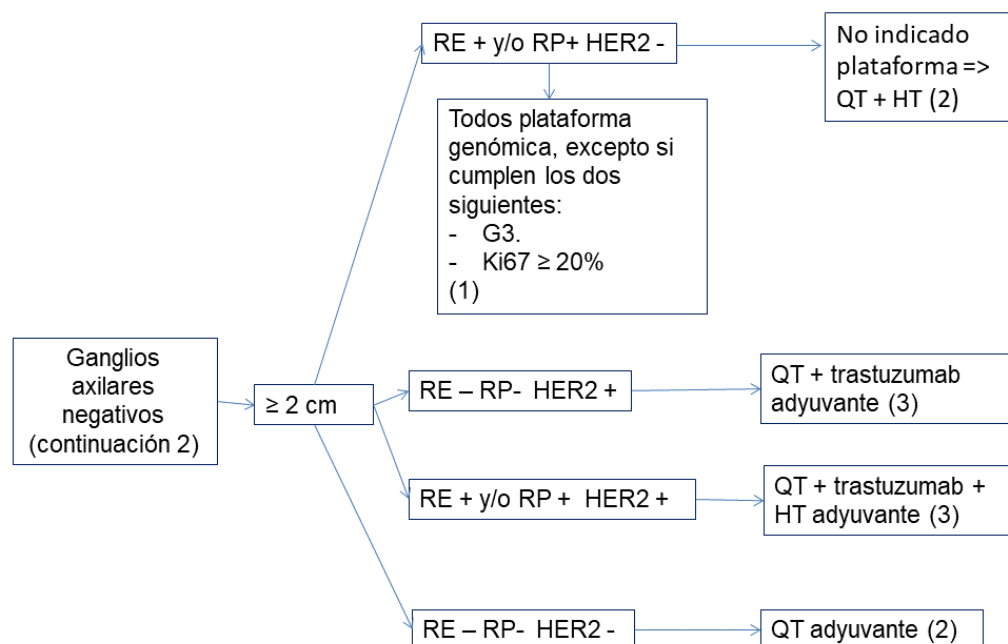

## (1) Según PROSIGNA:

Bajo riesgo: HT.

Riesgo intermedio: HT +/- QT según ROR individual a 10 años.

Riesgo individual de recidiva a distancia a 10 años ≥ 15% (riesgo intermedio alto y alto riesgo): QT + HT.

Según ONCOTYPE (indicado siempre en ≤ 50 años y tumores ≤ 3 cm):

Score &lt; 15: HT.

Score 15 – 20: HT y valorar QT.

Score ≥ 21: QT + HT.

(2) QT adyuvante, si no han recibido QT neoadyuvante. Si tras neoadyuvancia no consiguen RCp en la cirugía, valorar 8 ciclos de capecitabina adyuvante (1250mg/m<sup>2</sup> /12h x 14d/21d) después de la RT (si precisa).

(3) QT adyuvante, si no han recibido QT neoadyuvante. Si tras neoadyuvancia (con quimioterapia y trastuzumab neoadyuvantes (sin pertuzumab)) hay enfermedad residual invasiva, valorar TDM1 en lugar de trastuzumab adyuvante, 14 ciclos (3.6 mg/kg iv/3 semanas).

(NOTA) Pautas de QT, HT y trastuzumab en tablas 1 y 2.

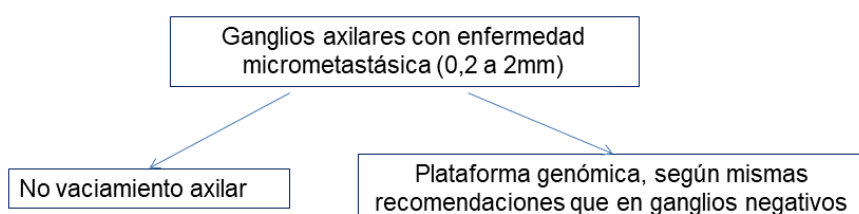

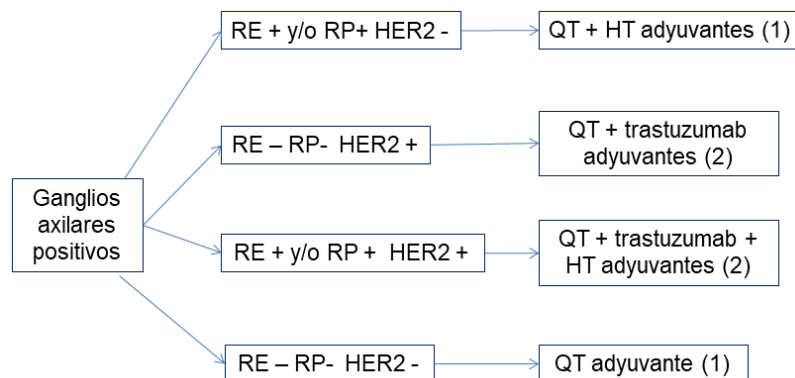

(1)QT adyuvante, si no han recibido QT neoadyuvante. Si tras neoadyuvancia no consiguen RCp en la cirugía, valorar 8 ciclos de capecitabina adyuvante (1250mg/m<sup>2</sup> /12h x 14d/21d) después de la RT (si precisa).

(2)QT adyuvante, si no han recibido QT neoadyuvante. Si tras neoadyuvancia (con quimioterapia y trastuzumab neoadyuvantes (sin pertuzumab)) hay enfermedad residual invasiva, valorar TDM1 en lugar de trastuzumab adyuvante, 14 ciclos (3.6 mg/kg iv/3 semanas).

(NOTA) Pautas de QT, HT y trastuzumab en tablas 1 y 2.

## II.5. TRATAMIENTO SISTÉMICO NEOADYUVANTE

### II.5.a.INDICACIONES:

#### 1. Tumores NO localmente avanzados (estadios I-II):

No posibilidad de cirugía conservadora (por relación tamaño tumoral/tamaño mama).

Tumores HER2 positivos o triple negativo, de  $\geq 2$  cm o con axila positiva.

Valorar en tumores RE+ RP+ HER2- Ki67 $\geq 20\%$  o Grado 3 con axila positiva.

(La obtención de pCR en tumores con RH+ con características de agresividad podría influir en la evolución de las pacientes).

#### 2. Tumores localmente avanzados (estadios III): Afectación cutánea o de pared torácica o adenopatías axilares fijas (T4 o N2).

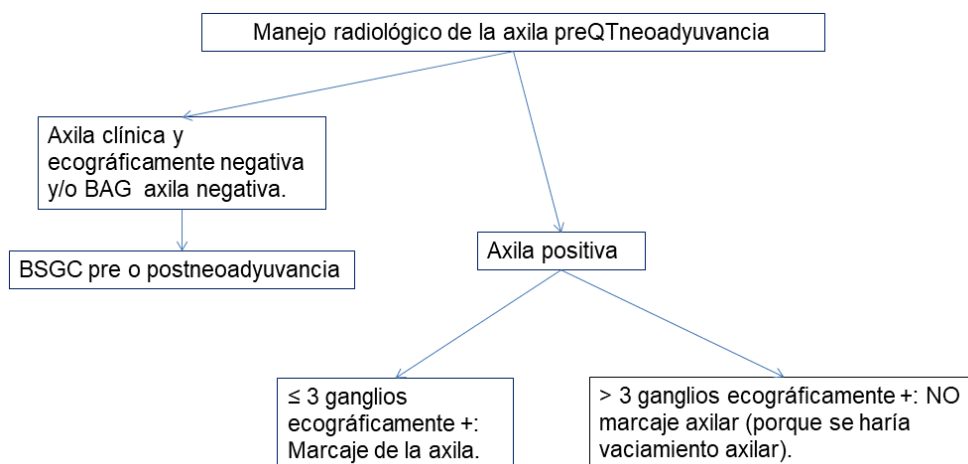



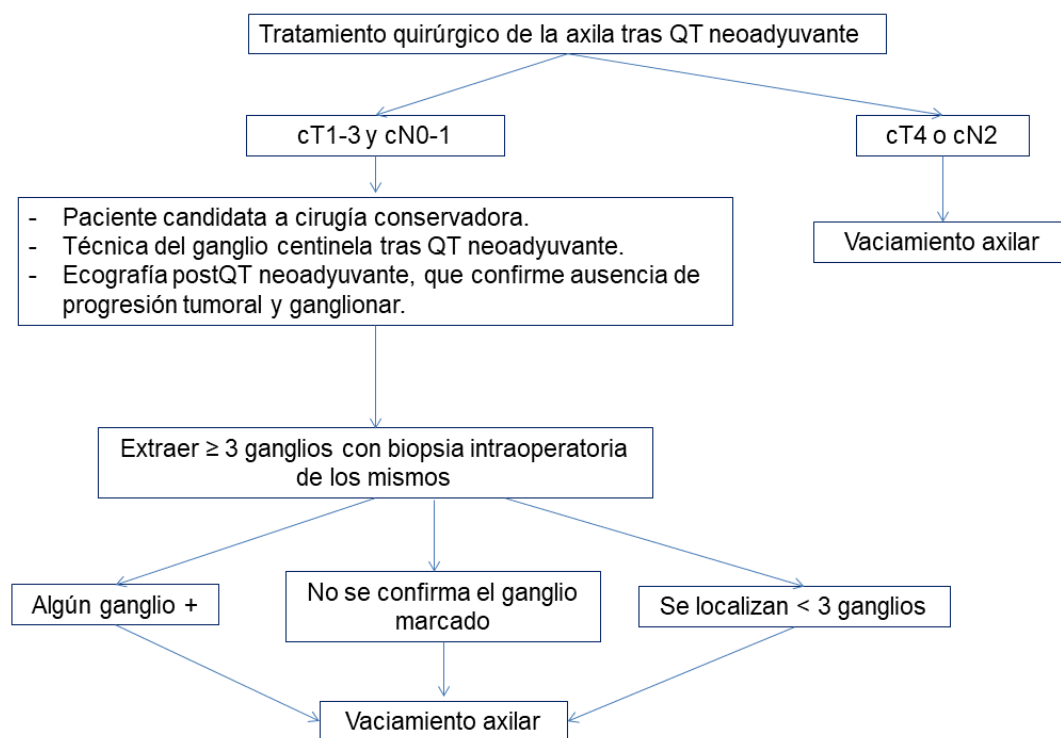

### II.5.b. TRATAMIENTO SISTÉMICO NEOADYUVANTE:

Antes de iniciar tratamiento sistémico:

- Realizar marcaje de la lesión.
- Establecer estado axila.

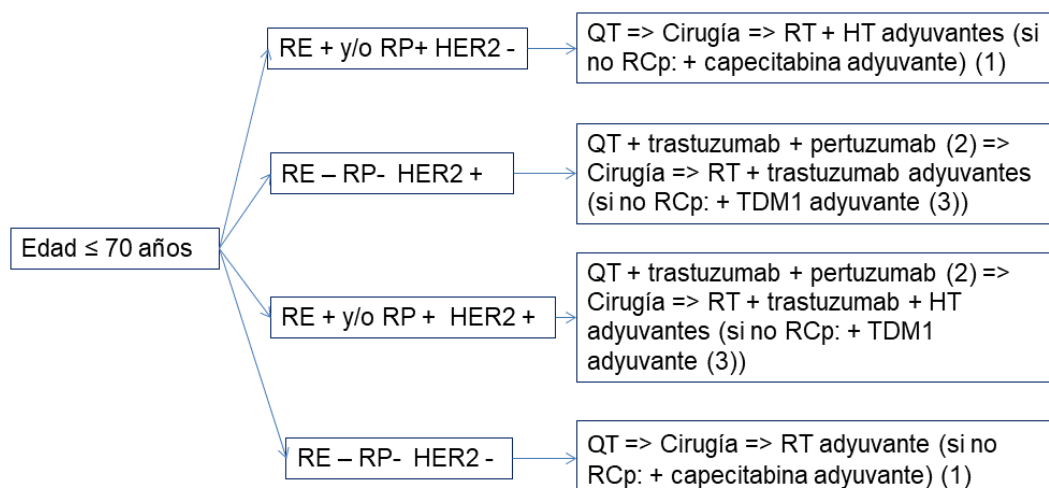

(1) Si tras neoadyuvancia no consiguen RCp en la cirugía, valorar 8 ciclos de capecitabina adyuvante (1250mg/m<sup>2</sup> /12h x 14d/21d) después de la RT (si precisa).

(2) Pertuzumab en neoadyuvancia:

- En HER2 puro: si  $T \geq 2$  cm.
- HER2 + RH+: si  $T \geq 2$  cm y N+.

MCBSv1.1: C

(3) Pacientes HER2 positivas con enfermedad residual invasiva tras quimioterapia neoadyuvante con trastuzumab (sin pertuzumab neoadyuvante): TDM1 14 ciclos (3.6 mg/kg iv/3 semanas) en lugar de trastuzumab adyuvante.

(NOTA) Pautas de QT, HT, trastuzumab y pertuzumab en tablas 1 y 2.

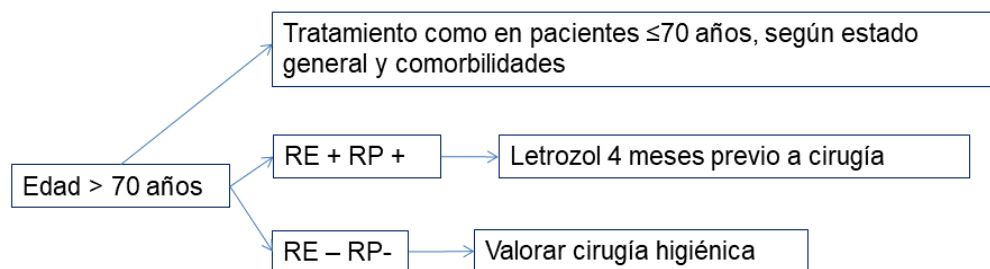

## II.6. INDICACIONES DE RADIOTERAPIA

- Siempre si cirugía conservadora.
- Tras mastectomía si:
  - o Tumores mayores de 5 cm de diámetro (pT3).
  - o pT4 por afectación de piel, pared o ambos.
  - o Afectación axilar de 4 o más ganglios (N2-N3).
  - o Borde de resección afecto.
  - o Carcinoma inflamatorio.
  - o En el caso de pT1-2 (<5cm) N1 (1-3 ganglios), valorar si >1 de los siguientes criterios:
    - Edad < 40 años.
    - Invasión linfovascular extensa.
    - RH negativos, triple negativo, o bien, HER2+.
    - G3.

## II.7. CRITERIOS Y MODIFICACIONES DEL TRATAMIENTO ADYUVANTE Y NEOADYUVANTE CON TRASTUZUMAB

### II.7.a. EVALUACION DE PACIENTES ANTES DE QUIMIOTERAPIA CON ANTRACICLINAS Y/O TRASTUZUMAB:

- Anamnesis: Eventos cardiacos previos y FRCV.
- Expl. física: Control TA, signos de IC.
- ECG: Ritmo, intervalos PR y QT, isquemia, lesión o necrosis.
- Determinación FEVI: de elección por ecocardiograma (alternativas MUGA, RNM).
- Control inicial, cada 3 meses durante el tratamiento con trastuzumab y cada 6 meses tras finalizarlo, un mínimo de 24m tras su última administración.

| FEVI (ECOCARDIO)    | SIGNOS o SINTOMAS | TIPO DE QUIMIOTERAPIA               | COMENZAR IECAS | CONSULTAR CARDIOLOGO |
|---------------------|-------------------|-------------------------------------|----------------|----------------------|
| >LLN<br>> 50%       | NO                | Estándar con ANTRACICLINAS          | NO             | NO                   |
| ≤LLN (50%)<br>> 40% | NO                | Considerar QT SIN ANTRACICLINAS (1) | SI             | SI                   |
| ≤ 40%               | SI                | Considerar QT SIN ANTRACICLINAS     | SI             | SI                   |

(1) Si se usan antraciclinas se requiere vigilancia estrecha con troponinas en cada ciclo.

#### II.7.b. EVALUACION DE PACIENTES DESPUES DE QUIMIOTERAPIA CON ANTRACICLINAS Y ANTES DE INICIAR TRASTUZUMAB:

- Anamnesis: Síntomas IC.
- Expl. física: Control TA, signos IC.
- ECG: Valorar cambios.
- Nueva determinación FEVI: de elección por ecocardiograma (alternativas MUGA, RNM).

| FEVI (Ecocardiograma)                      | SIGNOS SÍNTOMAS | Comenzar TRASTUZUMAB                                                         | Comenzar IECAS | Consultar CARDIOLOGO                                          |
|--------------------------------------------|-----------------|------------------------------------------------------------------------------|----------------|---------------------------------------------------------------|
| >LLN<br>> 50%<br>↓FEVI tras QT<10%         | NO              | SI                                                                           | NO             | NO<br>Medir FEVI: 4,8,12 meses                                |
| ≤ LLN (50%)<br>> 40%<br>↓FEVI tras QT≥ 10% | NO              | Se recomienda esperar 3 meses e iniciar si la función cardíaca se restablece | SI (1)         | SI<br>Medir FEVI: cada 3 meses o si clínica IC cada 3 semanas |
| ≤ 40%                                      | SI              | NO RECOMENDADO                                                               | SI             | SI<br>Medir FEVI: Según cardiólogo                            |

(1) Se podría iniciar con controles FEVI cada 3 semanas y si caída a <40% parar tratamiento y reevaluar en 3 meses.

Añadir betabloqueantes.

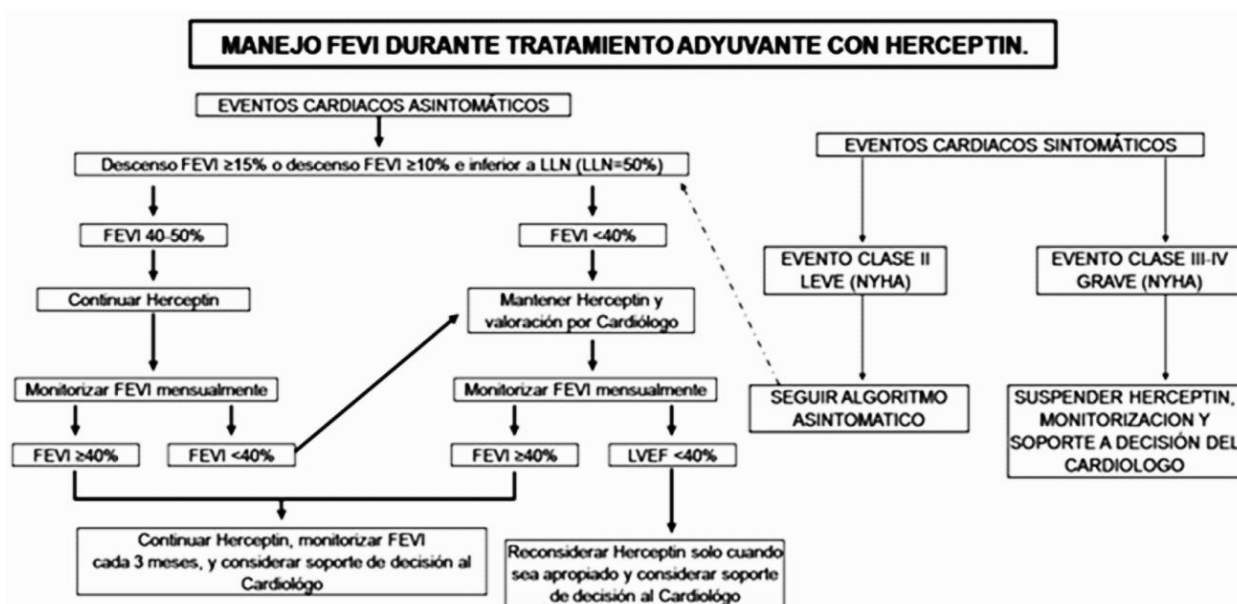

## II.8. TRATAMIENTO RECIDIVA LOCAL

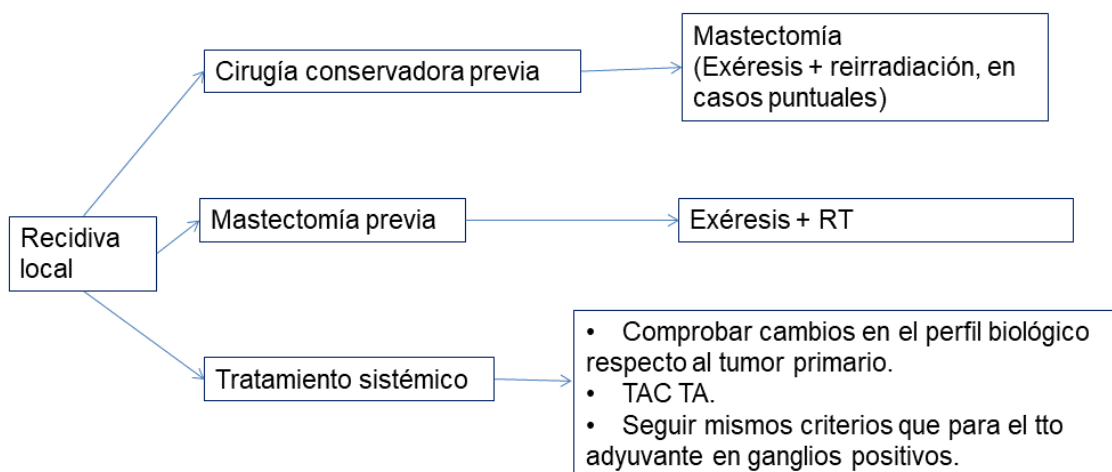

## II.9. SEGUIMIENTO

3 PRIMEROS AÑOS después de finalizado el tto inicial:

- Cada 6 meses: Expl física y analítica general.
- Cada 12 meses: Expl física, analítica general, mamografía y si tto con tamoxifeno control ginecológico.

DEL 4º AL 5º AÑO (INCLUSIVOS) después de finalizado el tto inicial:

- Cada 12 meses: Expl física, analítica general, mamografía y si tto con tamoxifeno control ginecológico.

TRAS 5º AÑO FINALIZADO: Seguimiento por Atención Primaria (salvo criterios de CMOH).

### **III. TRATAMIENTO ENFERMEDAD METASTÁSICA**

#### **III.1. VALORAR SIEMPRE INCLUSIÓN EN ENSAYO CLÍNICO**

#### **III.2. VALORAR BIOPSIA DE LESIÓN METASTÁSICA**

En los siguientes casos:

- Perfil IHQ del tumor desconocido, sin posibilidad de recuperar bloque de parafina original.
- En los casos de RH negativos (por posibilidad de falso negativo).
- En los casos de discordancia perfil IHQ/curso clínico o perfil IHQ/respuesta terapéutica.

#### **III.3. TRATAMIENTO SISTÉMICO**

Valorar criterios de enfermedad visceral agresiva:

- Linfangitis pulmonar o metástasis pulmonares que causen tos o disnea.
- Metástasis hepáticas que ocasionen:
  - o Transaminasas (GOT o GPT) > 2,5 veces LSN.
  - o Bilirrubina > 1,25 veces LSN.
  - o Tiempo de protrombina alterado.
- Metástasis SNC con sintomatología significativa.
- Metástasis óseas con invasión de médula ósea con repercusión periférica.
- Enfermedad rápidamente progresiva con afectación de estado general.

Valorar en metástasis óseas:

- Ácido Zoledrónico 4mg IV en 15 minutos cada 3-4 semanas durante 2 años o hasta progresión ósea de enfermedad.
  - o Se recomienda administrar suplementos orales diarios de calcio 500 mg y vitamina D 400 UI. Valorar administración cada 12 semanas a partir de la décima dosis.
- Denosumab mensual, con aporte de calcio.

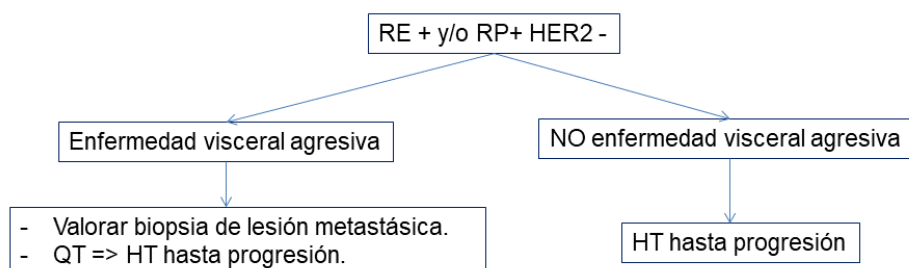

(NOTA)

- Pautas de QT y HT en tablas 3 y 4.
- Valorar número de ciclos de QT en función del esquema, valorando siempre beneficio clínico/toxicidad.

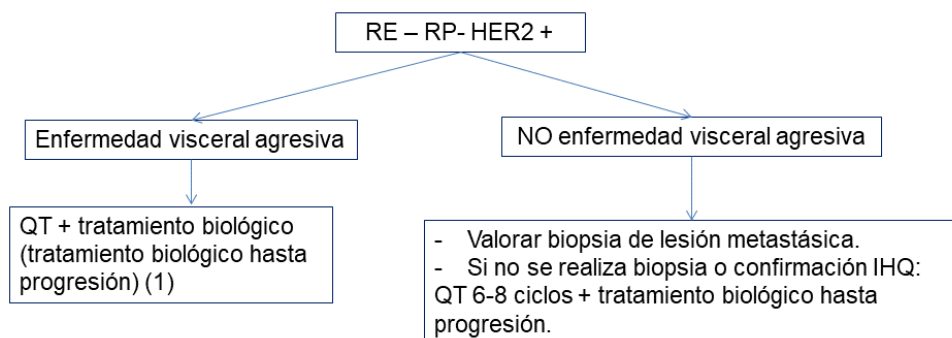

(NOTA) Pautas de QT, trastuzumab y pertuzumab en tablas 3 y 4.

(1) Valorar número de ciclos de QT en función del esquema, valorando siempre beneficio clínico/toxicidad.

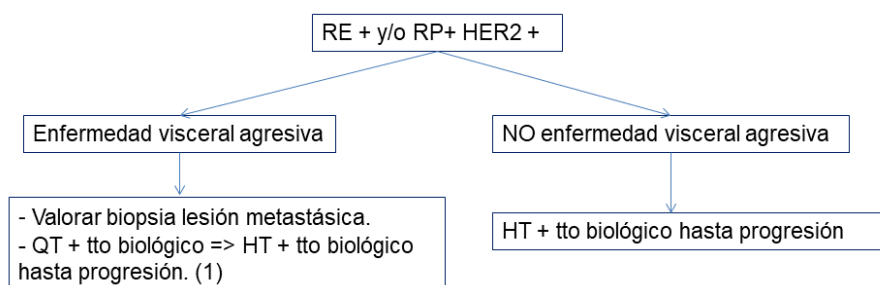

(NOTA) Pautas de QT, HT, trastuzumab y pertuzumab en tablas 3 y 4.

(1) Valorar número de ciclos de QT en función del esquema, valorando siempre beneficio clínico/toxicidad.

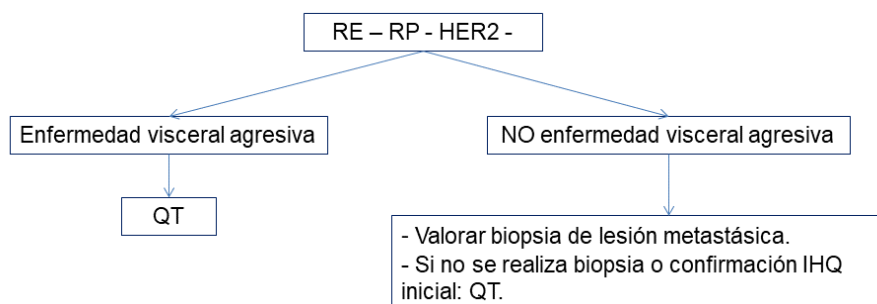

(NOTA) Pautas de QT en tablas 3 y 4.

Valorar número de ciclos de QT en función del esquema, valorando siempre beneficio clínico/toxicidad.

#### IV. CÁNCER DE MAMA EN EL VARÓN

##### IV.1. TRATAMIENTO QUIRÚRGICO

- Preferible mastectomía (alta tendencia a la recidiva local) + BSGC en axila negativa.

- T3-4 con axila positiva por PAAF o BAG: QT neoadyuvante => mastectomía + disección axilar.

#### **IV.2. TRATAMIENTO ADYUVANTE**

- Indicado en alto riesgo (según mismos criterios que en la mujer, con mismos esquemas).
- 99% sensibles a hormonas => tamoxifeno adyuvante (no avalado papel de IA en adyuvancia).
- Aprox 7% HER2 + => desconocido papel de trastuzumab adyuvante, pero se siguen las mismas directrices que en la mujer.
- Valorar RT adyuvante (tumores con más tendencia a la recidiva local y más difíciles la resección con márgenes libres).

#### **IV.3. TRATAMIENTO DE LA ENFERMEDAD AVANZADA**

- NO enfermedad visceral agresiva:
  - o HT, escogiendo tamoxifeno como 1ª línea.
  - o Posteriormente se puede usar fluestrant, IA + análogos LHRH o QT.
- Enfermedad visceral agresiva:
  - o Misma actitud que en la mujer.

#### **V. RIESGO Y PREVENCIÓN DE OSTEOPOROSIS**

##### **V.1. MUJERES DE ALTO RIESGO**

- > 65 años.
- 60 – 64 años con:
  - o Historia familiar de osteoporosis.
  - o <70 kg de peso.
  - o Fractura no traumática previa.
- Postmenopáusica de cualquier edad que reciben tratamiento con IA.
- Premenopáusicas con terapéutica asociada con menopausia prematura.

##### **V.2. ACTITUD SEGÚN RIESGO DE OSTEOPOROSIS**

- BAJO RIESGO:
  - o No screening con DXA (densitometría ósea).
  - o Seguimiento anual.
  - o En postmenopáusica comenzar con calcio-vit D 1000-880 UI/24h ó 500mg/440UI/12h.
- ALTO RIESGO:
  - o Screening con DXA.

##### **V.3. ACTITUD SEGÚN RESULTADOS DXA**

- T-SCORE  $\leq$  -1:

- Iniciar Calcio, Vitamina D y Bifosfonatos.
- Repetir DXA anual.
- T-SCORE > -1:
  - No tratamiento adicional con calcio ni vitamina D.
  - No repetir DXA anual.

#### V.4. BIFOSFONATOS

- Alendronato 70mg oral/semanal.
- Risendronato 35mg oral/semanal.
- Ibandronato 150mg oral/mensual.
- Ácido zoledrónico 4mg iv/bianual (para malas cumplidoras, intolerancia oral o molestias gastrointestinales).
- Denosumab 60mg sc/6 meses.

### VI. MANEJO DE EFECTOS SECUNDARIOS

#### VI.1 SOFOCOS

- Modificaciones en el estilo de vida (ejercicio físico, ropa adecuada, control de la temperatura ambiente, evitar bebidas calientes, evitar alcohol, evitar obesidad, evitar tabaco).
- Tratamientos no hormonales:
  - a) Antidepresivos y otros neurofármacos:
    - Paroxetina 10-25mg/d (EVITAR JUNTO A TMX). Cuidado con farmacodependencia.
    - Fluoxetina 20mg/d (EVITAR JUNTO A TMX).
    - Citalopram 10mg/d.
    - Escitalopram 5-10mg/d.
    - Venlafaxina 75mg/d.
  - b) Anticonvulsiantes: Gabapentina 300-900mg/d.
  - c) Antihipertensivos: Clonidina 0.15mg/d.
- Alternativas no farmacológicas: Yoga, hipnosis, relajación controlada, acupuntura, bloqueo del ganglio estrellado.

#### VI.2. ATROFIA VAGINAL

Preparados no hormonales de aplicación local: ainar gel, velastisa intim, hidratante cumlaude.

Preparados hormonales con escasa absorción (seguras): promestrieno crema 1% 1-2 aplicaciones/d x 21 días.

#### VI.3. OSTEONECROSIS MANDIBULAR ASOCIADA A BIFOSFONATOS

De bajo riesgo: obturaciones profilácticas, endodoncias.

De alto riesgo: exodoncias, cirugía oral, apicectomías, implantes.

- Tratadas con bifosfonatos IV:



Antes y durante los 3 primeros meses de tratamiento:

- Retrasar inicio hasta salud dental óptima.
- Si precisa cirugía dentoalveolar realizar en este momento.
- Alerta traumatismos protésicos.

Más de 3 meses de tratamiento:

- Revisiones odontológicas/3-4 meses.
- No cirugías orales que dañen el hueso. No cirugía oral hasta pasados 10 años de la última administración de bifosfonato IV.

Si foco infeccioso: endodoncia con cobertura ATB.

– Tratados con bifosfonatos ORALES:

- Antes del tratamiento:

Lo que sea necesario en los 3 primeros años para conseguir estado óptimo de salud oral.

- Más de 3 años de tratamiento y con factores de riesgo (glucocorticoides y > 70 años):

- Suspensión del BF oral durante  $\geq 3$  meses de la cirugía oral y no reiniciar hasta la cicatrización completa de la herida.
- Informar riesgo y control anual de la salud oral.

**TABLA-1. HORMONOTERAPIA ENFERMEDAD TEMPRANA.**

**PREMENOPAÚSICAS**

- Primera opción: TAMOXIFENO 20 mg/día durante 5 años.
- Valorar en < 40 años: análogos + tamoxifeno 20 mg/ día durante 5 años (tras información detallada de efectos adversos):
  - Fundamentalmente si alto riesgo ( $\geq 4$  ganglios afectados).
  - Más dudoso, si criterios relativos.
    - NO con Oncotype  $\geq 25$ .
    - O bien, 1-3 ganglios afectados.
- Valorar completar 10 años de hormonoterapia adyuvante, teniendo en cuenta:
  - Deseo genésico de la paciente.
  - Perfil de efectos adversos.
  - Alto riesgo de recaída ( $\geq 4$  ganglios afectados).

**POSTMENOPAÚSICAS**

- INHIBIDOR DE AROMATASA, Anastrozol 1 mg/día, Letrozol 2.5 mg ó Exemestano 25 mg/día durante 5 años.
- Si existe intolerancia a IA, o contraindicación por el perfil de efectos adversos, valorar TAMOXIFENO durante 5 años.
- Valorar completar 10 años de hormonoterapia adyuvante si  $\geq 4$  ganglios afectados.

TABLA-2. QUIMIOTERAPIA Y TRATAMIENTOS BIOLÓGICOS ENFERMEDAD TEMPRANA

| Esquema                                                                                                               | Fármacos       | Dosis (mg/m²) | Días                | Frecuencia   | Nº ciclos |
|-----------------------------------------------------------------------------------------------------------------------|----------------|---------------|---------------------|--------------|-----------|
| ADYUVANCIA GANGLIOS NEGATIVOS HER2- (1)                                                                               |                |               |                     |              |           |
| TC                                                                                                                    | Taxotere       | 75            | 1                   | Cada 21 días | 4         |
|                                                                                                                       | Ciclofosfamida | 600           | 1                   |              |           |
| AC                                                                                                                    | Adriamicina    | 60            | 1                   | Cada 21 días | 4         |
|                                                                                                                       | Ciclofosfamida | 600           | 1                   |              |           |
| Si tumor triple negativo ≥ 2 cm N0 (y el paciente no recibió neoadyuvancia al venir desde otro centro): AC => taxano. |                |               |                     |              |           |
| Si tumor triple negativo 1 – 2 cm N0 (pieza quirúrgica): Realizar Mammaprint:                                         |                |               |                     |              |           |
| - Si riesgo bajo: Seguimiento vs TC vs AC.                                                                            |                |               |                     |              |           |
| - Si riesgo alto: AC => taxano.                                                                                       |                |               |                     |              |           |
| Si tumor triple negativo 0.5 – 1 cm: valorar tratamiento adyuvante.                                                   |                |               |                     |              |           |
| ADYUVANCIA GANGLIOS NEGATIVOS HER2+                                                                                   |                |               |                     |              |           |
| Paclitaxel + Trastuzumab (T: 0,5-2 cm)                                                                                | Paclitaxel     | 80 mg/m2      | 1,8 y 15            | Cada 21 días | 4         |
|                                                                                                                       | Trastuzumab sc | 600 mg        | 1                   |              | 18        |
| AC seguido de Trastuzumab                                                                                             | Adriamicina    | 60            | 1                   | Cada 21 días | 4         |
|                                                                                                                       | Ciclofosfamida | 600           | 1                   |              | 18        |
|                                                                                                                       | Trastuzumab sc | 600 mg        | 1                   |              |           |
| TC con Trastuzumab                                                                                                    | Taxotere       | 75            | 1                   | Cada 21 días | 4         |
|                                                                                                                       | Ciclofosfamida | 600           | 1                   |              | 18        |
|                                                                                                                       | Trastuzumab sc | 600 mg        | 1                   |              |           |
| FEC seguido de Trastuzumab                                                                                            | Fluoracilo     | 600           | 1                   | Cada 21 días | 6         |
|                                                                                                                       | Epirubicina    | 75-90         | 1                   |              |           |
|                                                                                                                       | Ciclofosfamida | 600           | 1                   |              |           |
|                                                                                                                       | Trastuzumab sc | 600 mg        | 1                   |              | 18        |
| ADYUVANCIA GANGLIOS POSITIVOS HER 2 – Y NEOADYUVANCIA HER 2 -                                                         |                |               |                     |              |           |
| AC =>Taxotere                                                                                                         | Adriamicina    | 60            | 1 (ciclos 1-4)      | Cada 21 días | 8         |
|                                                                                                                       | Ciclofosfamida | 600           | 1 (ciclos 1-4)      |              |           |
|                                                                                                                       | Taxotere       | 100           | 1 (ciclos 5-8)      |              |           |
| AC => Paclitaxel (1)                                                                                                  | Adriamicina    | 60            | 1 (ciclos 1-4)      | Cada 21 días | 8         |
|                                                                                                                       | Ciclofosfamida | 600           | 1 (ciclos 1-4)      |              |           |
|                                                                                                                       | Paclitaxel     | 80            | 1,8,15 (ciclos 5-8) |              |           |
| TC                                                                                                                    | Taxotere       | 75            | 1 (ciclo 1–4)       | 21           | 4         |
|                                                                                                                       | Ciclofosfamida | 600           | 1 (ciclo 1–4)       |              |           |
| TC x 6<br>(Elección si T2 con 0–3 ganglios positivos)                                                                 | Taxotere       | 75            | 1 (ciclo 1–6)       | 21           | 6         |
|                                                                                                                       | Ciclofosfamida | 600           | 1 (ciclo 1–6)       |              |           |
| ADYUVANCIA GANGLIOS POSITIVOS HER2+                                                                                   |                |               |                     |              |           |
| AC => Taxotere con Trastuzumab                                                                                        | Adriamicina    | 60            | 1 (ciclos 1-4)      | Cada 21 días | 8         |
|                                                                                                                       | Ciclofosfamida | 600           | 1 (ciclos 1-4)      |              |           |
|                                                                                                                       | Taxotere       | 100           | 1 (ciclos 5-8)      |              | 18        |
|                                                                                                                       | Trastuzumab sc | 600 mg        | 1 (ciclos 5-18)     |              |           |
| AC => Paclitaxel (1) con Trastuzumab                                                                                  | Adriamicina    | 60            | 1 (ciclos 1-4)      | Cada 21 días | 8         |
|                                                                                                                       | Ciclofosfamida | 600           | 1 (ciclos 1-4)      |              |           |
|                                                                                                                       | Paclitaxel     | 80            | 1,8,15 (ciclos 5-8) |              | 18        |
|                                                                                                                       | Trastuzumab sc | 600 mg        | 1 (ciclos 5-18)     |              |           |
| TCH                                                                                                                   | Taxotere       | 75            | 1                   | Cada 21 días | 6         |
|                                                                                                                       | Carboplatino   | AUC 6         |                     |              | 18        |
|                                                                                                                       | Trastuzumab sc | 600 mg        |                     |              |           |

| NEOADYUVANCIA HER2+ (RH- $\geq$ 2 cm, o bien, $\geq$ 2cm RH+ N+) |                |             |                     |              |    |
|------------------------------------------------------------------|----------------|-------------|---------------------|--------------|----|
| AC->Taxotere con Trastuzumab + Pertuzumab (1)                    | Adriamicina    | 60          | 1 (ciclos 1-4)      | Cada 21 días | 8  |
|                                                                  | Ciclofosfamida | 600         | 1 (ciclos 1-4)      |              |    |
|                                                                  | Taxotere       | 100         | 1 (ciclos 5-8)      |              |    |
|                                                                  | Pertuzumab     | 840->420 mg | 1 (ciclos 5-8)      |              |    |
|                                                                  | Trastuzumab sc | 600 mg      | 1 (ciclos 5-18)     |              | 18 |
| AC->Paclitaxel (1) con Trastuzumab + Pertuzumab (1)              | Adriamicina    | 60          | 1 (ciclos 1-4)      | Cada 21 días | 8  |
|                                                                  | Ciclofosfamida | 600         | 1 (ciclos 1-4)      |              |    |
|                                                                  | Paclitaxel     | 80          | 1,8,15 (ciclos 5-8) |              |    |
|                                                                  | Pertuzumab     | 840->420 mg | 1 (ciclos 5-8)      |              |    |
|                                                                  | Trastuzumab sc | 600 mg      | 1 (ciclos 5-18)     |              | 18 |

(1)Nota: Si se administra Paclitaxel semanal en adyuvancia, y la paciente no tiene antecedentes hematológicos que supongan riesgo de neutropenia, trombopenia o riesgo de toxicidad hepática añadida, se puede valorar realizar las analíticas de control cada 21 días.

(1) MCBS v1.1: C

| TABLA-3. HORMONOTERAPIA Y TRATAMIENTOS BIOLÓGICOS ENFERMEDAD AVANZADA. |                                                                                                                                                                                                                                                                                                                                                                                                                                                                                                                    |
|------------------------------------------------------------------------|--------------------------------------------------------------------------------------------------------------------------------------------------------------------------------------------------------------------------------------------------------------------------------------------------------------------------------------------------------------------------------------------------------------------------------------------------------------------------------------------------------------------|
| PACIENTES HER2-                                                        |                                                                                                                                                                                                                                                                                                                                                                                                                                                                                                                    |
| PRE o PERIMENOPÁUSICAS                                                 |                                                                                                                                                                                                                                                                                                                                                                                                                                                                                                                    |
| Primera línea (1)                                                      | <p><b>Si no Tamoxifeno adyuvante durante los 12 meses previos:</b><br/>Tamoxifeno 20 mg/día +/- Goserelin 3,6 mg/28 días o 10,8 mg/84 días + ribociclib 600mg/d x 21d/28d (1)</p> <p><b>Si Tamoxifeno adyuvante durante los 12 meses previos:</b><br/>Letrozol 2,5 mg/día o anastrozol 1 mg/día o exemestano 25 mg + Goserelin 3,6 mg/28 días o 10,8 mg/84 días + ribociclib 600mg/d x 21d/28d. (1)</p>                                                                                                            |
| Segunda línea                                                          | Fulvestrant (500 mg D1 y D15 C1, posteriormente cada 28 días) + Goserelin 3,6 mg/28 días o 10,8 mg/84 días + palbociclib (125 mg/día cada 21 días en ciclos de 28 días) (2) o ribociclib 600mg/d x 21d/28d (si no ha recibido previamente un inhibidor de ciclinas).                                                                                                                                                                                                                                               |
| Siguientes líneas                                                      | Valorar cualquiera de las opciones de tratamiento no utilizadas en primera línea (sin inhibidores de ciclinas).                                                                                                                                                                                                                                                                                                                                                                                                    |
| POSTMENOPÁUSICAS                                                       |                                                                                                                                                                                                                                                                                                                                                                                                                                                                                                                    |
| Primera línea                                                          | Letrozol 2.5 mg/día continuo + ribociclib (600 mg/día) (3) o palbociclib (125 mg/día) cada 21 días en ciclos de 28 días) (4)<br>Tamoxifeno 20 mg/día<br>Letrozol 2.5 mg/día (inhibidor aromatasa no esteroideo)<br>Anastrozol 1 mg/día (inhibidor aromatasa no esteroideo)<br>Exemestano 25 mg/día (inhibidor aromatasa esteroideo)<br>Fulvestrant 500 mg/28 días con dosis adicional a los 14 días de la primera dosis                                                                                            |
| Siguientes líneas                                                      | Fulvestrant (500 mg D1 y D15 C1, posteriormente cada 28 días) + palbociclib (125 mg/día cada 21 días en ciclos de 28 días) (2) o ribociclib 600mg/d x 21d/28d (si no ha recibido previamente un inhibidor de ciclinas).<br>Tamoxifeno 20 mg/día<br>Letrozol 2.5 mg/día (inhibidor aromatasa no esteroideo)<br>Anastrozol 1 mg/día (inhibidor aromatasa no esteroideo)<br>Exemestano 25 mg/día (inhibidor aromatasa esteroideo)<br>Fulvestrant 500 mg/28 días con dosis adicional a los 14 días de la primera dosis |

|                                                                                                                                                                                                                                                                                                                                                                                                                                                                                                                                                                                                                                                                                                                                                                                                        |                                                                                                                                                                                                                                                                                                                                                                                                                                             |
|--------------------------------------------------------------------------------------------------------------------------------------------------------------------------------------------------------------------------------------------------------------------------------------------------------------------------------------------------------------------------------------------------------------------------------------------------------------------------------------------------------------------------------------------------------------------------------------------------------------------------------------------------------------------------------------------------------------------------------------------------------------------------------------------------------|---------------------------------------------------------------------------------------------------------------------------------------------------------------------------------------------------------------------------------------------------------------------------------------------------------------------------------------------------------------------------------------------------------------------------------------------|
|                                                                                                                                                                                                                                                                                                                                                                                                                                                                                                                                                                                                                                                                                                                                                                                                        | <p>Exemestano 25 mg/día + Everolimus 10 mg/día SOLO se considera indicado en los siguientes casos (MCBSv1.1: 2):</p> <ul style="list-style-type: none"> <li>- Pacientes con hormonosensibilidad demostrada que hayan progresado en curso de letrozol o anastrozol para la enfermedad metastásica (duración de respuesta o estabilización <math>\geq 6</math> meses).</li> <li>- ECOG 0-1.</li> </ul> <p>Acetato de megestrol 160 mg/día</p> |
| <p>(1) Monaleesa 7: permitido tras HT de adyuvancia o neoadyuvancia y tras 1ª línea de QT para enfermedad metastásica.</p> <p>(2) Paloma 3: Progresión durante HT para enfermedad metastásica, o bien, en curso o &lt; 12 meses de la HT adyuvante/neoadyuvante. MCBS v1.1: 4</p> <p>(3) Monaleesa 2: Metastásicas al diagnóstico o tras &gt; 12 meses de HT (con IA o TMX) en adyuvancia o neoadyuvancia. MCBSv1.1: 3</p> <p>(4) Paloma 2: Metastásicas al diagnóstico o tras &gt; 12 meses de HT (con IA o TMX) en adyuvancia o neoadyuvancia. MCBSv1.1: 3</p> <p>** Criterios exclusión para inhibidores de ciclinas: ECOG <math>\geq 2</math>, afectación SNC, afectación visceral avanzada sintomática (en caso de ribociclib: también si enfermedad cardíaca significativa o no controlada).</p> |                                                                                                                                                                                                                                                                                                                                                                                                                                             |
| <b>PACIENTES HER2+</b>                                                                                                                                                                                                                                                                                                                                                                                                                                                                                                                                                                                                                                                                                                                                                                                 |                                                                                                                                                                                                                                                                                                                                                                                                                                             |
| <b>PREMENOPÁUSICAS</b>                                                                                                                                                                                                                                                                                                                                                                                                                                                                                                                                                                                                                                                                                                                                                                                 |                                                                                                                                                                                                                                                                                                                                                                                                                                             |
| Primera línea                                                                                                                                                                                                                                                                                                                                                                                                                                                                                                                                                                                                                                                                                                                                                                                          | <p>Letrozol 2,5 mg/día + Goserelin 3,6 mg/28 días o 10,8 mg/84 días + Lapatinib 1500 mg/día</p> <p>Anastrozol 1 mg/día + Goserelin 3,6 mg/28 días o 10,8 mg/84 días + Trastuzumab sc 600 mg/21 días</p>                                                                                                                                                                                                                                     |
| Siguientes líneas                                                                                                                                                                                                                                                                                                                                                                                                                                                                                                                                                                                                                                                                                                                                                                                      | Valorar cualquiera de las opciones de tratamiento no utilizadas en primera línea.                                                                                                                                                                                                                                                                                                                                                           |
| <b>POSTMENOPÁUSICAS</b>                                                                                                                                                                                                                                                                                                                                                                                                                                                                                                                                                                                                                                                                                                                                                                                |                                                                                                                                                                                                                                                                                                                                                                                                                                             |
| Primera línea                                                                                                                                                                                                                                                                                                                                                                                                                                                                                                                                                                                                                                                                                                                                                                                          | <p>Letrozol 2,5 mg/día + Lapatinib 1500 mg/día</p> <p>Anastrozol 1 mg/día + Trastuzumab sc 600mg//21 días</p>                                                                                                                                                                                                                                                                                                                               |
| Siguientes líneas                                                                                                                                                                                                                                                                                                                                                                                                                                                                                                                                                                                                                                                                                                                                                                                      | Valorar cualquiera de las opciones de tratamiento no utilizadas en primera línea.                                                                                                                                                                                                                                                                                                                                                           |

**TABLA-4. QUIMIOTERAPIA Y TRATAMIENTOS BIOLÓGICOS ENFERMEDAD AVANZADA.**

| Esquema                              | Farmacos       | Dosis (mg/m²) | Días                 | Frecuencia   | Nº ciclos |
|--------------------------------------|----------------|---------------|----------------------|--------------|-----------|
| PACIENTES HER2-                      |                |               |                      |              |           |
| Primera línea                        |                |               |                      |              |           |
| AdriaTaxotere                        | Adriamicina    | 75            | 1 (ciclos 1-3 o 1-2) | Cada 21 días | 6         |
|                                      | Taxotere       | 75            | 1 (ciclos 4-6 o 3-6) |              |           |
| Taxotere                             | Taxotere       | 75-100        | 1                    | Cada 21 días | 6-8       |
| Paclitaxel                           | Paclitaxel     | 80-90         | 1,8,15               | Cada 21-28   | BC/T      |
| Paclitaxel-Bevacizumab (MBCSv1.1: 2) | Paclitaxel     | 80-90         | 1,8,15               | Cada 28 días | BC/T      |
|                                      | Bevacizumab    | 10 mg/kg      | 1,15                 |              |           |
| Siguientes líneas                    |                |               |                      |              |           |
| Adriamicina                          | Adriamicina    | 75            | 1                    | Cada 21 días | 6         |
| Epirubicina                          | Epirubicina    | 75-90         | 1                    | Cada 21 días | 6         |
| Myocet                               | Myocet         | 60-75         | 1                    | Cada 21 días | BC/T      |
| Caelyx                               | Caelyx         | 50-60         | 1                    | Cada 21 días | BC/T      |
| Taxotere                             | Taxotere       | 75            | 1                    | Cada 21 días | 6-8       |
| Paclitaxel                           | Paclitaxel     | 80-90         | 1,8,15               | Cada 21-28   | BC/T      |
| Nab-paclitaxel                       | Nab-paclitaxel | 260           | 1                    | Cada 21 días | BC/T      |
| Nab-paclitaxel                       | Nab-paclitaxel | 100-150       | 1,8,15               | Cada 28 días | BC/T      |
| Capecitabina                         | Capecitabina   | 2000-2500     | 1-14                 | Cada 21 días | BC/T      |
| Vinorelbina IV                       | Vinorelbina    | 25            | 1,8,15               | Cada 21-28   | BC/T      |
| Vinorelbina oral                     | Vinorelbina    | 60-80         | 1,8,15               | Cada 21días  | BC/T      |

|                                                                                                                                                                                           |                |             |                   |                   |      |
|-------------------------------------------------------------------------------------------------------------------------------------------------------------------------------------------|----------------|-------------|-------------------|-------------------|------|
| Eribulina<br>(MBCSv1.1: 2)                                                                                                                                                                | Eribulina      | 1,23        | 1,8               | Cada 21 días      | BC/T |
| FEC                                                                                                                                                                                       | Fluoracilo     | 600         | 1                 | Cada 21 días      | 6    |
|                                                                                                                                                                                           | Epirubicina    | 75-90       | 1                 |                   |      |
|                                                                                                                                                                                           | Ciclofosfamida | 600         | 1                 |                   |      |
| Myocet-FC                                                                                                                                                                                 | Myocet         | 60          | 1                 | Cada 21 días      | BC/T |
|                                                                                                                                                                                           | Fluoracilo     | 600         | 1                 |                   |      |
|                                                                                                                                                                                           | Ciclofosfamida | 600         | 1                 |                   |      |
| CMF                                                                                                                                                                                       | Ciclofosfamida | 600         | 1                 | Cada 21 días      | 6    |
|                                                                                                                                                                                           | Metotrexate    | 40          | 1                 |                   |      |
|                                                                                                                                                                                           | Fluoracilo     | 600         | 1                 |                   |      |
| CMF                                                                                                                                                                                       | Ciclofosfamida | 100         | 1-14 vía oral     | Cada 21 días      | 6    |
|                                                                                                                                                                                           | Metotrexate    | 40          | 1                 |                   |      |
|                                                                                                                                                                                           | Fluoracilo     | 600         | 1                 |                   |      |
| Triple M                                                                                                                                                                                  | Metotrexate    | 35mg/m2     | 1, 22             | Cada 6<br>semanas | 6    |
|                                                                                                                                                                                           | Mitoxantrona   | 7mg/m2      | 1, 22             |                   |      |
|                                                                                                                                                                                           | Mitomicina C   | 7mg/m2      | 1                 |                   |      |
| Gemcitabina-<br>Paclitaxel                                                                                                                                                                | Gemcitabina    | 1250        | 1,15              | Cada 28 días      | BC/T |
|                                                                                                                                                                                           | Paclitaxel     | 150         |                   |                   |      |
| Carboplatino-<br>Gemcitabina                                                                                                                                                              | Carboplatino   | AUC 5-6     | 1                 | Cada 21 días      | BC/T |
|                                                                                                                                                                                           | Gemcitabina    | 1250        | 1,8               |                   |      |
| Combinación<br>metronómica                                                                                                                                                                | Ciclofosfamida | 50 mg/día   | Continuo vía oral | Cada 21 días      | BC/T |
|                                                                                                                                                                                           | Metotrexate    | 2,5 mg/12 h | L y M vía oral    |                   |      |
| PACIENTES HER2+                                                                                                                                                                           |                |             |                   |                   |      |
| Primera línea en pacientes sin Trastuzumab adyuvante o con Trastuzumab adyuvante e ILE >6 meses                                                                                           |                |             |                   |                   |      |
| Taxotere-<br>Trastuzumab-<br>Pertuzumab<br>(MCBS v1.1: 4)                                                                                                                                 | Taxotere       | 75          | 1                 | Cada 21 días      | 6-8  |
|                                                                                                                                                                                           | Trastuzumab sc | 600 mg      | 1                 |                   | BC/T |
|                                                                                                                                                                                           | Pertuzumab     | 840-420 mg  | 1                 |                   |      |
| Paclitaxel-<br>Trastuzumab-<br>Pertuzumab<br>(MCBS v1.1: 4)                                                                                                                               | Paclitaxel     | 80-90       | 1,8,15            | Cada 21           | BC/T |
|                                                                                                                                                                                           | Trastuzumab sc | 600 mg      | 1                 |                   |      |
|                                                                                                                                                                                           | Pertuzumab     | 840-420 mg  | 1                 |                   |      |
| Primera línea en pacientes con recidiva durante Trastuzumab adyuvante o ILE ≤6 meses                                                                                                      |                |             |                   |                   |      |
| T-DM1<br>(MCBS v1.1: 4)                                                                                                                                                                   | T-DM1          | 3,6 mg/kg   | 1                 | Cada 21 días      | BC/T |
| Segunda línea                                                                                                                                                                             |                |             |                   |                   |      |
| T-DM1<br>(MCBS v1.1: 4)                                                                                                                                                                   | T-DM1          | 3,6 mg/kg   | 1                 | Cada 21 días      | BC/T |
| Trastuzumab-<br>Lapatinib<br>(MCBS v1.1: 4)                                                                                                                                               | Trastuzumab sc | 600 mg      | 1                 | Cada 21 días      | BC/T |
|                                                                                                                                                                                           | Lapatinib      | 1000 mg/día | Continuo          |                   |      |
| Siguientes líneas<br>(En el caso de QT + trastuzumab (≥3 líneas): si la mejor respuesta (en la primera reevaluación) es progresión => ya NO se pondrá más trastuzumab en dicha paciente). |                |             |                   |                   |      |
| Capecitabina-<br>Lapatinib<br>(MCBS v1.1: 3)                                                                                                                                              | Capecitabina   | 2000        | 1-14              | Cada 21 días      | BC/T |
|                                                                                                                                                                                           | Lapatinib      | 1250 mg/día | Continuo          |                   |      |
| Vinorelbina-<br>Trastuzumab                                                                                                                                                               | Vinorelbina    | 25          | 1,8               | Cada 21 días      | BC/T |
|                                                                                                                                                                                           | Trastuzumab sc | 600 mg      | 1                 |                   |      |
| Capecitabina-<br>Trastuzumab                                                                                                                                                              | Capecitabina   | 2000-2500   | 1-14              | Cada 21 días      | BC/T |
|                                                                                                                                                                                           | Trastuzumab sc | 600 mg      | 1                 |                   |      |
| Paclitaxel-Myocet-<br>Trastuzumab                                                                                                                                                         | Paclitaxel     | 80          | 1,8               | Cada 21 días      | BC/T |
|                                                                                                                                                                                           | Mvocet         | 50          | 1                 |                   |      |

|                                             |                |             |           |              |      |
|---------------------------------------------|----------------|-------------|-----------|--------------|------|
|                                             | Trastuzumab sc | 600 mg      | 1         |              |      |
| Paclitaxel-<br>Carboplatino-<br>Trastuzumab | Paclitaxel     | 80          | 1,8,15    | Cada 28 días | BC/T |
|                                             | Carboplatino   | AUC 2       | 1,8,15    |              |      |
|                                             | Trastuzumab sc | 600 mg      | 1,8,15,21 |              |      |
| Paclitaxel-<br>Trastuzumab                  | Paclitaxel     | 80-90       | 1,8,15    | Cada 21      | BC/T |
|                                             | Trastuzumab sc | 600 mg      | 1         |              |      |
| Trastuzumab-<br>Lapatinib                   | Trastuzumab sc | 600 mg      | 1         | Cada 21 días | BC/T |
|                                             | Lapatinib      | 1000 mg/día | Continuo  |              |      |
| Trastuzumab                                 | Trastuzumab sc | 600 mg      | 1         | Cada 21 días | BC/T |

## Cáncer de esófago y de la unión gastroesofágica (SIEWERT I-II)

### I. DIAGNÓSTICO y ESTADIFICACIÓN

- **Diagnóstico anatomopatológico** mediante la **clasificación de la WHO**. Fundamental diferenciar entre adenocarcinoma (más frecuente en esófago distal) y escamoso (esófago medio-proximal) por implicación pronóstica, siendo mandatorio en tumores pobremente diferenciados o indiferenciados.
- **Estadaje:** Clasificación TNM de la AJCC/UICC, 8ª edición.
- **Anamnesis.**
- **Exploración física completa.**
- **Análítica con hemograma, bioquímica** (función renal + iones, hepática, LDH, calcio y proteínas totales) **y perfil nutricional** (colesterol, pre-albumina, albúmina, magnesio, Vit D 21-OH).
- **Valoración nutricional.** Si el paciente no ha sido derivado a Endocrinología/Nutrición desde Comité de Tumores, esta valoración debe realizarse durante la primera visita o posterior antes del inicio de tratamiento sistémico. Se empleará como método de cribado nutricional el denominado **Nutriscore** (ver protocolo de nutrición), que clasificará a los pacientes en 2 grupos en función de si presentan o no riesgo nutricional. Si Nutriscore  $\geq 5$ , derivar a Nutrición y realizar **VGS-GP** (Valoración Global Subjetiva Generada por Paciente) (anexo 2), que vuelve a clasificar al paciente en 3 grupos; si B (desnutrición moderada) o C (desnutrición severa).
- **Endoscopia digestiva alta con toma de biopsias** (de todas las zonas sospechosas).
- **Tránsito esofagogastroduodenal (EGD):** si no fuera posible realizar endoscopia digestiva alta, para evaluar la longitud y localización del tumor en estenosis completa, y en caso de sospecha de fístula traqueo-esofágica.
- **TC tórax-abdomen-pelvis con contraste.**
- **EUS:** estadificación más precisa de T y N. No indicada en pacientes con enfermedad diseminada.
- **Traqueo-broncoscopia:** tumores localizados en y/o por encima de bifurcación traqueal.
- **GGO:** Sólo en casos seleccionados si clínica sospechosa o elevación fosfatasa alcalina no justificable por otros motivos.
- **PET-TC:** para pacientes potencialmente resecables.

### II. TRATAMIENTO

Valoración multidisciplinar obligada en comité de tumores antes de llevar a cabo cualquier tratamiento, ya que en el mismo se va a valorar si la enfermedad es resecable y el paciente operable. Los factores principales que van a definir la selección del tratamiento primario son a) estadio TNM, b) localización, c) histología y d) PS y comorbilidades asociadas.

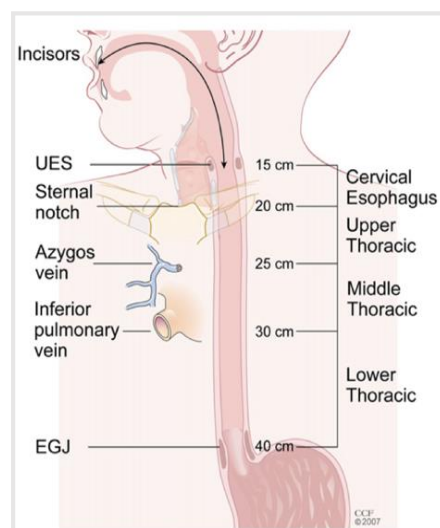

## II.1. Enfermedad localizada

### a. ESTADIO I (cT1-2, N0)

- Neoplasias de esófago intratorácico (tercio medio/distal) y pacientes *fit*: **Cirugía radical como tratamiento de elección** y siendo la técnica estándar la esofagectomía radical transtorácica (movilización gástrica por vía laparoscópica y toracotomía derecha), denominada *Ivor-Lewis*, sobre la resección transhiatal, por permitir la primera una linfadenectomía más rigurosa y presentar una menor tasa de complicaciones.
- En pacientes con neoplasia de esófago superior u otra localización, pero *unfit* para cirugía: **Tratamiento de QT-RT radical**.
  - De elección, **esquema CDDP + 5FU** (1 ciclo c/28 días), por un total de 4 ciclos
    - CDDP 75 mg/m<sup>2</sup> iv D1
    - 5-FU 1000 mg/m<sup>2</sup> iv en IC D1 a D4
    - Radioterapia 50.4 Gy (1,8 Gy/fracción).
  - Si *contraindicación para cisplatino* y/o insuficiencia renal con *CLCr entre 20-60 ml/min* valorar esquema FOLFOX (1 ciclo c/ 14 días) por un total de 6 ciclos (3 ciclos concomitantes a la RT).
    - Oxaliplatino 85 mg/m<sup>2</sup> iv D1
    - Leucovorin: 200 mg/m<sup>2</sup> iv D1
    - 5-FU 400 mg/m<sup>2</sup> en bolo seguido de 5-FU 1600 mg/m<sup>2</sup> iv en IC 46 horas

## II.2. Enfermedad localmente avanzada

### II.2.a. ESTADIOS II - III (cT3-4a ó cN1 – N3)

- Neoplasia de esófago superior y otra localización con paciente *unfit* para cirugía: **Tratamiento de QT-RT radical** (*ver punto 1.a*).
- Neoplasias de esófago intratorácico (tercio medio/distal) resecables y pacientes *fit*: **Tratamiento de QT-RT neoadyuvante**.
  - De primera elección (excepto cT4) el **esquema CROSS** que supone la combinación de RT y QT con carboplatino + paclitaxel:
    - CBDCA AUC 2 mg/ml x min iv, los D1, D8, D15, D22 y D29.
    - Paclitaxel: 50 mg/m<sup>2</sup> iv, D1, D8, D15, D22 y D29.
    - Radioterapia 41.4 Gy (1,8 Gy/fracción)**ESMO-MCBS v 1.1 A**
  - En pacientes con tumores cT4, considerar esquema CDDP + 5-FU (1 ciclo c/ 28d) x 2-3 ciclos concomitante a RT:
    - CDDP: 75 mg/m<sup>2</sup> I.V. D1.
    - 5-FU: 1000 mg/m<sup>2</sup> IC D1-4
    - Radioterapia 41.4-50.4 Gy (1.8-2 Gy/fracción).
- Evaluación a las 4-6 semanas de finalizar la RT con TC tórax-abdomen-pelvis +/- EUS y presentación en Comité de Tumores Digestivos.



## Cáncer de esófago y de la unión gastroesofágica (SIEWERT I-II)

- Los pacientes deben ser intervenidos tras el tratamiento neoadyuvante de forma obligada, aunque se haya obtenido una respuesta morfológica (EUS/TC) completa.

### II.2.b. ESTADIOS IIIC (T4b) IRRESECABLES o estadios II-III RESECABLES, pero no operables: Tratamiento de QT-RT radical. (ver punto 1.a)

### II.3. Enfermedad metastásica

Tratamiento de QT paliativa en pacientes con PS  $\leq 2$  y expectativa de vida  $>3$  meses. De lo contrario, derivación a Cuidados Paliativos para tratamiento de soporte y control de síntomas, pudiendo valorar opciones locales paliativas (RT, endoprótesis, etc...).

- Carcinoma escamoso

#### Esquema CBDCA + Paclitaxel (1 ciclo c/21 días)

Paclitaxel 200 mg/m<sup>2</sup> iv D1

CBDCA AUC 5 mg/ml x min iv D1

#### Esquema CDDP/FU (1 ciclo c/ 28 días)

CDDP 100 mg/m<sup>2</sup> iv D1

5 FU 1000 mg/m<sup>2</sup> iv D1-5 en infusión continua de 24 horas

**Esquema FOLFOX** (1 ciclo c/14 días) o en su defecto **esquema XELOX**, si no disfagia a sólidos que impida la toma de capecitabina así como conservar un CLCr  $> 30$  ml/min (si 30-50, capecitabina a 950 mg/m<sup>2</sup>).

Oxaliplatino 85 mg/m<sup>2</sup> iv D1

Leucovorin: 200 mg/m<sup>2</sup> iv D15-FU 400 mg/m<sup>2</sup> en bolo seguido de 5-FU 1600 mg/m<sup>2</sup> iv en IC 46 horas

ó

Capecitabina 1000 mg/m<sup>2</sup> vo D1-14

- Adenocarcinoma: ver protocolo cáncer gástrico, apartado 3

## ADC DE ESÓFAGO DISTAL ó DE LA UNION GASTROESOFÁGICA (UGE)

- Siewert I = Desde 1cm por encima de la UGE, hasta 5 cm:
  - **QT-RT neoadyuvante** según esquema CROSS y posterior cirugía.
- Siewert II = Desde 1cm por encima del cardias y 2 cm por debajo de la UGE:
  - **QT-RT neoadyuvante** según esquema CROSS
  - **QT de estrategia periooperatoria** con esquema FLOT (tratamiento de elección)
- Siewert III = Desde 2 cm por debajo de la UGE, hasta 5 cm:
  - **QT de estrategia periooperatoria** con esquema FLOT (ver protocolo de adenocarcinoma gástrico).

## Cáncer de esófago y de la unión gastroesofágica (SIEWERT I-II)

En aquellos pacientes que no han recibido tratamiento perioperatorio o QT-RT neoadyuvante, valorar tratamiento QT-RT adyuvante según esquema MacDonalds (*ver protocolo cáncer gástrico, apartado 2*). Para enfermedad metastásica, en histología de adenocarcinoma solicitar estudio por inmunohistoquímica y/o ISH de HER2 y como tratamiento sistémico emplear los esquemas indicados para adenocarcinoma gástrico diseminado (*ver protocolo cáncer gástrico, apartado 3*)

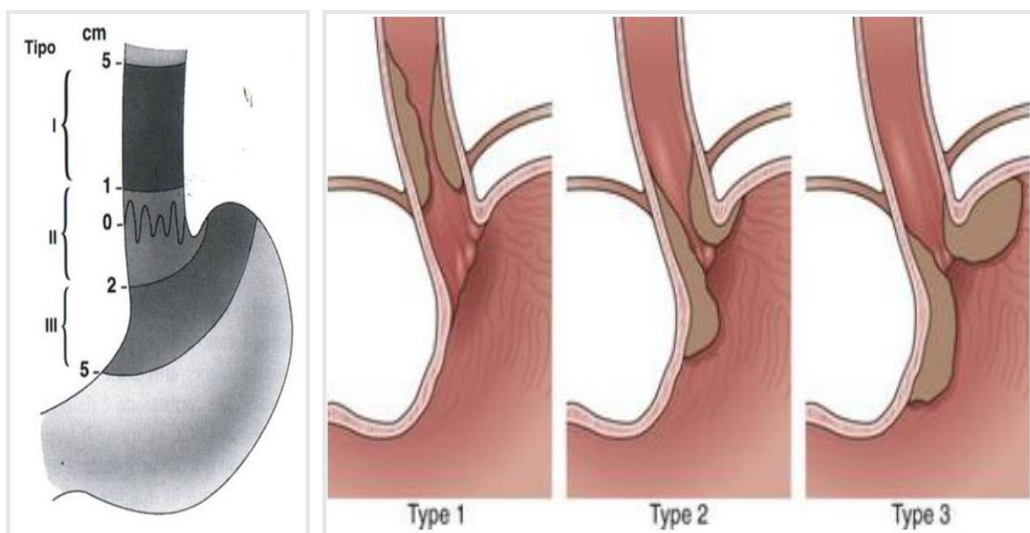

### III. SEGUIMIENTO

- 1º - 2º año: Frecuencia de visitas cada 3-6 meses
- 3 - 5º años: Frecuencia de visitas cada 6-12 meses

En cada revisión se solicitará hemograma y bioquímica.

La endoscopia digestiva alta se solicitará en caso de disfagia, y las pruebas de imagen según clínica.

**\*\***En caso de pacientes tratados con QT-RT, respuesta completa y no operados, visitas cada 3-4 meses con EDA con biopsia (si precisa) + TC.

## Adenocarcinoma gástrico y adenocarcinoma de la unión gastroesofágica SIEWERT III

### I. DIAGNÓSTICO y ESTADIFICACIÓN

- **Diagnóstico anatomopatológico** mediante la **clasificación de la WHO**. En enfermedad metastásica y sin contraindicación para platinos y/o terapias anti-HER2, solicitar determinación en biopsia histológica de estatus de HER2 (inmunohistoquímica +/- ISH).
- **Estadificación:** Clasificación TNM de la AJCC/UICC, 8ª edición.
- **Anamnesis.**
- **Exploración física completa.**
- **Analítica con hemograma, bioquímica** (función renal + iones, hepática, LDH, calcio y proteínas totales) **y perfil nutricional** (colesterol, prealbumina, albúmina, magnesio, Vit D 21-OH).
- **Valoración nutricional.** Si el paciente no ha sido derivado a Endocrinología/Nutrición desde Comité de Tumores, esta valoración debe realizarse durante la primera visita o posterior antes del inicio de tratamiento sistémico. Se empleará como método de cribado nutricional el denominado **Nutriscore** (ver protocolo de nutrición), que clasificará a los pacientes en 2 grupos en función de si presentan o no riesgo nutricional. Si Nutriscore  $\geq 5$ , derivar a Nutrición y realizar **VGS-GP** (Valoración Global Subjetiva Generada por Paciente) (anexo 2), que vuelve a clasificar al paciente en 3 grupos; si B (desnutrición moderada) o C (desnutrición severa).
- **Endoscopia digestiva alta con toma de biopsias** (al menos 6-8 muestras).
- **TC tórax-abdomen-pelvis con contraste.**
- **EUS:** estadificación más precisa de T y N. Indicada para pacientes potencialmente resecables. Superior al TC para el diagnóstico de enfermedad ganglionar, además de permitir toma de muestra histológica.
- **Laparoscopia exploradora +/- lavado peritoneal:** para pacientes potencialmente resecables (estadío IB-III), mayor beneficio si cT3/T4, N+, G3, diferenciación células en anillo de sello y/o linitis.
- **GGO:** Sólo en casos seleccionados si clínica sospechosa o elevación fosfatasa alcalina no justificable por otros motivos.
- **PET-TC:** Sólo para casos seleccionados. No informativo en pacientes con histología mucinosa o difuso.

### II. TRATAMIENTO

La cirugía es el único tratamiento potencialmente curativo. Es obligada la valoración multidisciplinar en comité de tumores antes de llevar a cabo cualquier tratamiento. El tipo de resección será la gastrectomía total o subtotal (criterios quirúrgicos), siendo recomendable para considerar una cirugía oncológica radical con intención curativa la realización de una linfadenectomía, al menos, D2 (mínimo resección de 15 ganglios: D1 + ganglios tronco celiaco e hilio esplénico) si hablamos de un paciente *fit* u operable. En centros con experiencia y referencia como es el nuestro,

## Adenocarcinoma gástrico y adenocarcinoma de la unión gastroesofágica SIEWERT III

se realiza *linfadenectomía D2 modificada*, que se diferencia de la estándar en que no conlleva esplenectomía ni pancreatometomía distal, siempre que no exista infiltración de dichos órganos y/o ganglios sospechosos regionales.

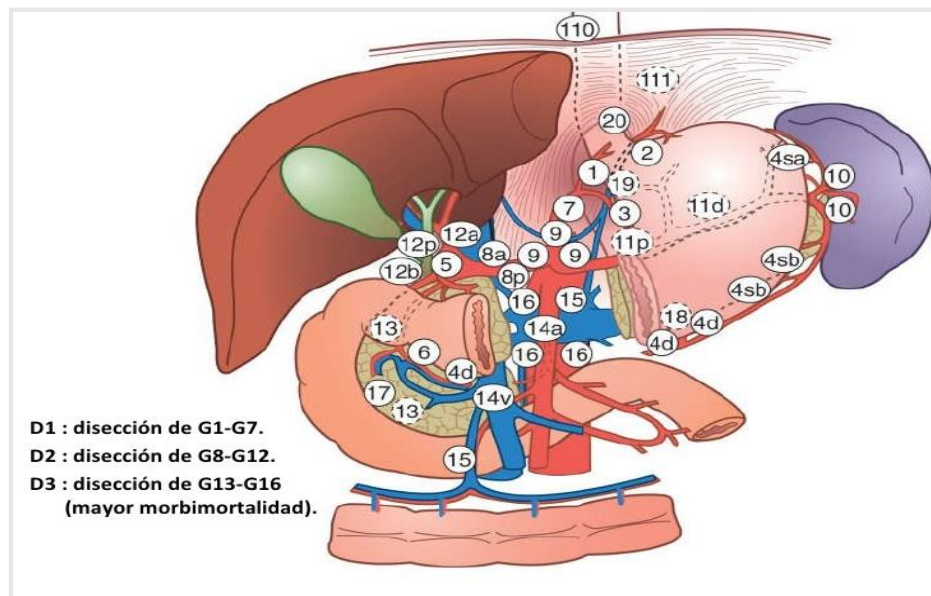

- **Enfermedad localizada T1N0:** Resección endoscópica en casos muy seleccionados → *T1a, bien diferenciado, ≤ 2 cm y no ulcerado*. No se realiza en nuestro centro, sí en el H. Costa del Sol (derivar). De lo contrario, resección quirúrgica radical.
- **Estadíos IB-III:** Tratamiento QT perioperatoria y cirugía.

### II.1. TRATAMIENTO PERIOPERATORIO

- PS 0-1
- Sin sangrado digestivo activo anemizante ni cuadro de obstrucción intestinal que sea imposible asegurar una correcta nutrición (prótesis, sondaje nasogástrico/nasoyeyunal).
- Estadio clínico IB-III
- Edad ≤ 75 años. En paciente más añosos, valorar según comorbilidades, factores de riesgo, estatus nutricional.
- Buena función hepática y renal.

**Esquema FLOT (1 ciclo c/14 días).** 4 ciclos previos a la cirugía y 4 posteriores. Entre 3 y 6 semanas tras C4, evaluación radiológica con TC seguido de valoración en comité multidisciplinar para planificar tratamiento quirúrgico. Tras la cirugía, entre 6-12 semanas después se retomará tratamiento de quimioterapia.

Docetaxel 50 mg/m<sup>2</sup> iv D1.

Oxaliplatino 85 mg/m<sup>2</sup> iv D1.

Leucovorin 200 mg/m<sup>2</sup> iv D1.

5-FU 2600 mg/m<sup>2</sup> en infusión continua de 24 horas D1

*\*Profilaxis primaria con G-CSF*

**ESMO-MCBS v1.1 = A**

## II.2. TRATAMIENTO ADYUVANTE

- a. PS < 2
- b. pT3, pT4 y/o pN+, tanto si cirugía R0 como R1 y si no ha recibido tratamiento perioperatorio.
- c. Si  $\geq 70$  años, valorar en función de PS, número y severidad de comorbilidades asociadas.
- d. Linfadenectomía < D2 o histología no difusa. *Sólo el 10% de los pacientes incluidos en el estudio de "Macdonald" (estudio pivotal), fueron tratados mediante una linfadenectomía D2, luego este abordaje terapéutico adyuvante no debe considerarse como un standard para un paciente con linfadenectomía D2.*

### Esquema de tratamiento QT-RT (Macdonald) con 5 ciclos de 5FU-LV (1 ciclo c/28 días)

1º ciclo: 5FU 425 mg/m<sup>2</sup>/d e Isovorin 10 mg/m<sup>2</sup>/d x 5 días.

2º ciclo (4 primeros días de la RT): 5FU 400 mg/m<sup>2</sup>/d e Isovorin 10 mg/m<sup>2</sup>/d x 4 días.

3º ciclo (3 últimos días de la RT): 5FU 400 mg/m<sup>2</sup>/d e Isovorin 10 mg/m<sup>2</sup>/d x 3 días.

4º ciclo (1 mes finalizada la RT): 5FU 425 mg/m<sup>2</sup>/d e Isovorin 10 mg/m<sup>2</sup>/d x 5 días.

5º ciclo: 5FU 425 mg/m<sup>2</sup>/d e Isovorin 10 mg/m<sup>2</sup>/d x 5 días.

\*\* RT fraccionamiento estándar (45 Gy en 25 fracciones de 1.8 Gy/día, 5 sesiones/semana durante 5 semanas y técnica IMRT).

## II.3. TRATAMIENTO PALIATIVO

### a. Primera línea

- Sobreexpresión/amplificación HER2: **ESQUEMA TOGA**, CDDP + Capecitabina (ó 5FU) + Trastuzumab (1 ciclo/21 días). Se administrarán 6 ciclos, continuando con trastuzumab de mantenimiento cada 3 semanas hasta progresión de enfermedad o toxicidad inaceptable:

Trastuzumab 8mg/kg iv C1D1, seguido de 6 mg/kg a partir de C2

CDDP 80 mg/m<sup>2</sup> iv D1

Capecitabina 1000 mg/m<sup>2</sup> vo cada 12 horas D1-14 ó 5FU 800 mg/m<sup>2</sup> iv en IC D1-5.

- HER2 negativo: Varias opciones de tratamiento, con similar eficacia y ningún esquema claramente superior.

- o Esquemas basados en oxaliplatino = **FOLFOX, XELOX**.

- XELOX (1 ciclo c/21 días)→ Pacientes con PS  $\leq 2$ , sin disfagia a sólidos y cuyo ClCr entre 30-50 (reducción 25%) ó > 50 ml/min.

- FOLFOX (1 ciclo c/14 días)→ Pacientes con PS  $\leq 2$ , con disfagia a sólidos y/o ClCr 20-30 ml/min. Requiere port-a-cath.

- o Esquemas basados en Irinotecán = **FOLFIRI**, de elección en pacientes con cuadro suboclusivo, PS  $\leq 2$  y/o con carcinomatosis peritoneal (1 ciclo c/14 días). Requiere port-a-cath®.

CPT-11 180mg/m<sup>2</sup> iv D1

Leucovorin 400 mg/m<sup>2</sup> iv D1 en 2 horas seguido de

## Adenocarcinoma gástrico y adenocarcinoma de la unión gastroesofágica SIEWERT III

5FU: 400 mg/m<sup>2</sup> iv bolo D1

5FU: 2400 mg/m<sup>2</sup> iv en IC de 46h

### b. Segunda línea

Individualizar según PS del paciente y respuesta a primera línea, así como disponibilidad de ensayo clínico.

- En pacientes con progresión a > 3 meses tras fin de la primera línea, se puede valorar la opción de re-tratamiento.
- Esquema basado en taxanos:
  - o **Paclitaxel semanal en monoterapia** para pacientes con PS 2, no subsidiarios de poliquimioterapia y/o con contraindicación para terapia antiangiogénica.
  - o **Paclitaxel + Ramucirumab** (1 ciclo c/28 días).
    - Pacientes con PS 0-1
    - Buena función hepática
    - Ausencia de eventos tromboembólicos arteriales y/o venosos en los 6 meses previos.
    - HTA controlada.
    - Ausencia de fístula y/o complicación postquirúrgica en los 6 meses previos.

Taxol 80 mg/m<sup>2</sup> iv D1-8-15

Ramucirumab 8 mg/kg iv D1 y D15

**ESMO-MCBS v1.1 = 2**
- Esquema basado en Irinotecán:
  - o **FOLFIRI**
  - o **Irinotecan en monoterapia** para pacientes con PS 2, no subsidiarios de poliquimioterapia y/o con contraindicación para terapia antiangiogénica-taxanos.
- Esquemas basados en oxaliplatino = **XELOX** ó **FOLFOX**

### c. Líneas posteriores

A valorar según PS, edad y comorbilidades

- Paclitaxel semanal en monoterapia
- Irinotecán en monoterapia

## IV. SITUACIONES ESPECIALES

**IV.1. METASTASECTOMÍA:** En general los pacientes no se benefician de cirugía de las metástasis, aunque existan datos de supervivencias prolongadas para pacientes seleccionados con resección hepática y pulmonar, así como tras cirugía de tumores Krukenberg. Por el momento, la gastrectomía y la metastasectomía se siguen considerando abordajes experimentales, no válidos fuera de ensayo clínico.

## Adenocarcinoma gástrico y adenocarcinoma de la unión gastroesofágica SIEWERT III

---

**IV.2 CARCINOMATOSIS PERITONEAL:** No evidencia ni ensayos clínicos randomizados en pacientes caucásicos sobre cirugía de citorreducción peritoneal más HIPEC, luego de la misma forma se considera un estrategia experimental y no válida fuera de ensayo clínico.

### **V. SEGUIMIENTO**

- 1-2º año: cada 3-6 meses exploración física y analítica completa.
- 3-5º años: cada 6-12 meses exploración física y analítica completa.
- Valorar pruebas de imagen o endoscópicas en función de presencia de síntomas.

## Cáncer de páncreas

### I. DIAGNÓSTICO Y ESTADIFICACIÓN

- **Diagnostico histopatológico.** Siguiendo las directrices de la WHO 2010. Se basa en 3 puntos o categorías principales: línea de diferenciación celular (*exo o endocrina*), naturaleza macroscópica del tumor (*solido o quística*) y grado de diferenciación (G1, G2, G3).
- **Estadificación.** Según la 8ª edición de la clasificación TNM (2017).
- **Anamnesis.**
- **Exploración física.**
- **Análítica general con marcador tumoral Ca 19.9.** Este marcador no es útil para diagnostico primario, pero sí se recomienda su determinación para seguimiento y valoración de respuesta cinética al tratamiento sistémico. CEA no indicado en diagnostico ni para seguimiento.
- **Ecografía abdominal.**
- **TC tórax-abdomen-pelvis con contraste (fase arterial y portal).** Se debe evaluar afectación vascular (*arterial y venosa*), extensión local extrapancreática, presencia o no de adenopatías y análisis riguroso de parénquima hepático y peritoneo.
- **RM pancreato-hepática.** Sólo en caso de lesiones isoatenuantes en TC o lesiones inespecíficas a nivel hepático en TC para una mejor caracterización de las mismas. De lo contrario, no indicado su uso por igual sensibilidad y especificidad que la TC pero con mayor coste.
- **Valoración nutricional.** Si el paciente no ha sido derivado a Endocrinología/Nutrición desde Comité de Tumores, esta valoración debe realizarse durante la primera visita o posterior antes del inicio de tratamiento sistémico. Se empleará como método de cribado nutricional el denominado **Nutriscore** (ver protocolo de nutrición), que clasificará a los pacientes en 2 grupos en función de si presentan o no riesgo nutricional. Si Nutriscore  $\geq 5$ , derivar a Nutrición y realizar **VGS-GP** (Valoración Global Subjetiva Generada por Paciente) (anexo 2), que vuelve a clasificar al paciente en 3 grupos; si B (desnutrición moderada) o C (desnutrición severa).
- **EUS.** Evaluación de afectación vascular y obtención de material para histología (PAAF).
- **Biopsia del primario:**
  - Tumor irresecable no metastásico.
  - Tumor resecable *bordeline*.

Si biopsia negativa, repetir mediante PAAF o *core* biopsia guiada por EUS. No indicada en tumores con enfermedad M1 (en este caso BAG guiada por eco/TC de la lesión más accesible).

- **CPRE.** Restringida para casos con obstrucción de la vía biliar.



**II. TRATAMIENTO**

Tras el diagnóstico, valoración en Comité de Tumores, para definir la situación de resecabilidad de la enfermedad: *resecable, borderline o irresecable*. Esto dependerá principalmente del grado de contacto entre el tumor y la vena porta (VP), vena y arteria mesentérica superior (VMS, AMS), tronco celíaco (TC) y arteria hepática común (AHC).

**Tabla 2. Criterios de resecabilidad (criterios NCCN, ESMO)**

| Estatus            | M1 | Arterial                                                                                                                                                                                                                                                                                                                                                                                                                                                                                                                                                     | Venoso                                                                                                                                                                                                                                                                                                                                                                                                                                                                                             |
|--------------------|----|--------------------------------------------------------------------------------------------------------------------------------------------------------------------------------------------------------------------------------------------------------------------------------------------------------------------------------------------------------------------------------------------------------------------------------------------------------------------------------------------------------------------------------------------------------------|----------------------------------------------------------------------------------------------------------------------------------------------------------------------------------------------------------------------------------------------------------------------------------------------------------------------------------------------------------------------------------------------------------------------------------------------------------------------------------------------------|
| <b>Resecable</b>   | No | No contacto del tumor TC, AMS o AHC.                                                                                                                                                                                                                                                                                                                                                                                                                                                                                                                         | Sin contacto del tumor con VMS o VP $\leq 180^\circ$ sin irregularidad en el contorno venoso                                                                                                                                                                                                                                                                                                                                                                                                       |
| <b>Borderline</b>  | No | <b>Cabeza/uncinado:</b> <ul style="list-style-type: none"> <li>Tumor contacta con AHC sin extensión a TC o bifurcación de la arteria hepática permitiendo una segura y completa resección y reconstrucción.</li> <li>Tumor en contacto con AMS <math>\leq 180^\circ</math></li> </ul> <b>Cuerpo y cola:</b> <ul style="list-style-type: none"> <li>Tumor en contacto con TC <math>\leq 180^\circ</math></li> <li>Tumor en contacto con TC <math>&gt; 180^\circ</math> sin afectación aórtica y con arteria gastroduodenal intacta no comprometida</li> </ul> | Tumor en contacto con VMS o VP $> 180^\circ$ , contacto $\leq 180^\circ$ sin irregularidad en el contorno venoso o o trombosis de la vena, pero con luz del vaso adecuada a nivel proximal y distal al sitio de la participación que permita la resección segura y completa y la reconstrucción venosa.<br><br>Tumor en contacto con la vena cava inferior.                                                                                                                                        |
| <b>Irresecable</b> | No | <b>Cabeza/uncinado:</b> <ul style="list-style-type: none"> <li>Tumor en contacto con AMS <math>&gt; 180^\circ</math></li> <li>Tumor en contacto con TC <math>&gt; 180^\circ</math></li> <li>Tumor en contacto con la primera rama duodenal de la AMS.</li> </ul> <b>Cuerpo y cola:</b> <ul style="list-style-type: none"> <li>Tumor en contacto con AMS ó TC <math>&gt; 180^\circ</math></li> <li>Tumor en contacto con TC y afectación aórtica.</li> </ul>                                                                                                  | <b>Cabeza/uncinado:</b> <ul style="list-style-type: none"> <li>No posibilidad de resección y reconstrucción de VMS/VP por afectación tumoral u oclusión (puede ser debido al tumor o por trombosis).</li> <li>Contacto con la rama yeyunal de drenaje proximal de la VMS.</li> </ul> <b>Cuerpo y cola:</b> <ul style="list-style-type: none"> <li>No posibilidad de resección y reconstrucción de VMS/VP por afectación tumoral u oclusión (puede ser debido al tumor o por trombosis).</li> </ul> |

## II.1. ENFERMEDAD LOCALIZADA RESECABLE = Estadios IA – IIB (T1-3; N0-1).

- No afectación de grandes vasos (VP, AMS, VMS, AHC) ni de tronco celíaco.
- **Tratamiento quirúrgico con intención radical.** El tipo de cirugía oncológica dependerá de la localización del tumor primario (*Whipple* vs pancreatomía distal con esplenectomía). Linfadenectomía estándar implica como criterio de calidad resección de  $\geq 15$  ganglios linfáticos.
- **Tratamiento de quimioterapia adyuvante.** Tratamiento durante 6 meses, tanto en resección R0 como R1 y no posponer el inicio de tratamiento más allá de las 12 semanas tras la cirugía. Esquemas disponibles:
  - **Gemcitabina en monoterapia.** Por un total de 6 ciclos (1 ciclo c/28 días). A considerarlo en pacientes ancianos, PS 2 y/o con comorbilidades.  
 Gemcitabina 1000 mg/m<sup>2</sup> iv D1, D8, D15 cada 28 días.
  - **FOLFIRINOX modificado.** Por un total de 12 ciclos tras la cirugía (1 ciclo c/14 días), en pacientes con PS 0-1 y sin comorbilidades relevantes. Precisa port-a-cath®.  
 Oxaliplatino 85 mg/m<sup>2</sup> iv D1  
 Leucovorin 400 mg/m<sup>2</sup> iv D1  
 Irinotecan 150 mg/m<sup>2</sup> iv D1  
 5FU 2400 mg/m<sup>2</sup> iv en IC 46 horas  
 \*Profilaxis primaria con G-CSF.
  - **Gemcitabina + capecitabina.** Por un total de 6 ciclos (1 ciclo c/28 días), en pacientes con PS 0-1 y contraindicación para oxaliplatino/irinotecan.  
 Gemcitabina 1000 mg/m<sup>2</sup> iv D1, D8 y D15 cada 28 días.  
 Capecitabina 1660 mg/m<sup>2</sup> día vo cada 12 horas D1 a D21 cada 28 horas.

## II.2 ENFERMEDAD LOCALMENTE AVANZADA

### II.2.a. Enfermedad Potencialmente Resecable o *Borderline*

Decisión de tratamiento tras valoración en Comité de Tumores. Indicada como estrategia el **tratamiento de quimioterapia neoadyuvante** con los esquemas de quimioterapia más activos usados en enfermedad metastásica (*ver más adelante, apartado 2.3*). La elección de uno frente a otro vendrá dada según PS, edad, comorbilidades y cifras de bilirrubina. La secuencia de tratamiento consiste en 3 meses de quimioterapia, con realización posterior de TC tórax-abdomen-pelvis con contraste + Ca 19.9 y valoración en Comité de Tumores, según respuesta:

- Si respuesta radiológica y criterios de resecabilidad: cirugía y posterior tratamiento sistémico durante 3 meses con mismo esquema empleado previamente.
- Si no resecable y no progresión: valoración de tratamiento QT-RT concomitante (Gemcitabina 600 mg/m<sup>2</sup> semanal) y nueva valoración posterior en Comité de Tumores sobre resección quirúrgica.
- Si progresión: tratamiento de QT, pero ya 2º línea con intención paliativa.

### II.2.b. Enfermedad Irresecable

Tratamiento con quimioterapia empleando los esquemas de quimioterapia más activos usados en enfermedad metastásica (*ver más adelante, apartado 2.3*). Tras 3-4 meses de tratamiento, reevaluación radiológica con TC y ver

en Comité si alguna posibilidad quirúrgica. Si continúa siendo irresecable continuar con quimioterapia hasta progresión (*excepto si el esquema de tratamiento es FOLFIRINOX, máximo 12 ciclos*) o toxicidad inaceptable; para pacientes seleccionados con control de enfermedad (respuesta parcial o enfermedad estable) se puede valorar tratamiento QT-RT de consolidación como alternativa a continuar con tratamiento sistémico hasta progresión/toxicidad.

### II.3 ENFERMEDAD METASTÁSICA

#### – PRIMERA LÍNEA

- **Paciente candidato a QT sin limitaciones** (cumple todos los siguientes criterios): PS 0-1, <75 años, BT <1,5 mg/dl, buen estado nutricional, sin diarrea crónica y sin comorbilidades.

- **FOLFIRINOX** (1 ciclo c/14 días) \* durante 12 ciclos; requiere colocación de port-a-cath.

Oxaliplatino 85 mg/m<sup>2</sup> iv D1

Leucovorin 400 mg/m<sup>2</sup> iv D1

Irinotecan 180 mg/m<sup>2</sup> iv D1

5-FU 400 mg/m<sup>2</sup> en bolus seguido de 5 FU 2,4 g/m<sup>2</sup> iv en IC 46 horas

\*Profilaxis primaria con G-CSF.

#### **ESMO-MCBS v1.1 = 5**

\* Valoración de profilaxis antiemética moderadamente emetógena. Precaución en portadores de prótesis biliar al presentar mayor riesgo de colangitis/sepsis biliar.

- **Nab-paclitaxel + Gemcitabina** (1 ciclo c/28 días)

Gemcitabina 1000 mg/m<sup>2</sup> iv D1, 8,15

Nabpaclitaxel 125 mg/m<sup>2</sup> iv D1, 8,15

#### **ESMO-MCBS v1.1 = 2**

Duración de tratamiento = hasta progresión de la enfermedad o toxicidad inaceptable.

- **Candidato a QT con limitaciones** ( cumple al menos 1 criterio): PS 2, > 75 años, Disfunción orgánica leve-moderada (cardiológica, neurológica, endocrino-metabólica, renal, hiperbilirrubinemia no obstructiva reversible [si causa tumoral 1,5 – < 5 mg/dl; si causa no tumoral 1,5 – 3 mg/dl], ETV reciente, desnutrición/caquexia tumoral).

- **Nab-paclitaxel + Gemcitabina** (1 ciclo c/28 días). En pacientes con PS 2 por carga tumoral y valorando ajuste de dosis inicial.

Gemcitabina 1000 mg/m<sup>2</sup> iv D1, 8,15

Nabpaclitaxel 100 mg/m<sup>2</sup> iv D1, 8,15

#### **ESMO MCBS v1.1 = 2**

- **Gemcitabina en monoterapia** (1 ciclo c/28 días). En pacientes con PS 2 por comorbilidades y/o polineuropatía grave-limitante.  
Gemcitabina 1000 mg/m<sup>2</sup> iv semanal por 7 semanas y 1 de descanso y posteriormente D1, D8, D15 cada 28 días
- **No candidato a QT** (al menos 1 criterio): PS 3-4, disfunción orgánica grave, hiperbilirrubinemia no obstructiva que no permita ajuste de dosis (si causa tumoral > 5 mg/dl y de causa no tumoral > 3 mg/dl).
- **Tratamiento sintomático por UCP**

## – SEGUNDA LINEA

Tras progresión a primera línea y si el paciente mantiene un estado general aceptable (PS 0-1) con buena función renal-hepática-medular y expectativa de vida > 3 meses, ofrecer segunda línea de tratamiento sistémico. Valorar siempre:

- Tratamiento de soporte (prótesis, dolor, nutrición)
- Inclusión programa UCP

### Si PS 0-1

- 1ª línea basada en 5FU/LV (FOLFIRINOX):
  - **Nab-paclitaxel + Gemcitabina** (1 ciclo c/28 días).  
Gemcitabina 1000 mg/m<sup>2</sup> iv D1, 8,15  
Nabpaclitaxel 125 mg/m<sup>2</sup> iv D1, 8,15
  - **Gemcitabina en monoterapia** (1 ciclo c/28 días) si neurotoxicidad residual persistente o comorbilidades.  
Gemcitabina 1000 mg/m<sup>2</sup> iv semanal por 7 semanas y 1 de descanso y posteriormente D1, D8, D15 cada 28 días
- 1ª línea basada en gemcitabina (gemcitabina en monoterapia o gemcitabina + nab-paclitaxel):
  - **FOLFIRI** (1 ciclo/14 días)
  - **FOLFOX** (1 ciclo /14 días)
  - **Irinotecan liposomal + 5FU/LV (1 ciclo c/14 días)**  
Irinotecan liposomal 80 mg/m<sup>2</sup> iv D1  
5FU/LV 2400/400 mg/m<sup>2</sup>  
**ESMO-MCBS v1.1 = 2**
  - **XELOX** (1 ciclo c/21 días)  
Oxaliplatino: 130 mg/m<sup>2</sup> iv D1  
Capecitabina: 850 - 1000 mg/m<sup>2</sup>/12h vo x 14d cada 21 días
  - **Capecitabina en monoterapia** (1 ciclo c/21 días) si neurotoxicidad residual persistente o comorbilidades.

Capecitabina 1000 – 1200 mg/m<sup>2</sup> cada 12h x 14 d cada 21d.

Si PS 2

- Si ha recibido Gemcitabina:
  - **Capecitabina en monoterapia** (1 ciclo c/21 días)  
Capecitabina 1000 mg/m<sup>2</sup> cada 12h x 14 d cada 21d.
  - Tratamiento de soporte exclusivo
- Si no ha recibido gemcitabina:
  - **Gemcitabina en monoterapia** (1 ciclo c/28 días).  
Gemcitabina 1000 mg/m<sup>2</sup> iv semanal por 7 semanas y 1 de descanso y posteriormente D1, D8, D15 cada 28 días
  - Tratamiento de soporte exclusivo

**III. SEGUIMIENTO** (paciente tratado con intención curativa):

- Años 1 y 2:
  - Cada 3 meses exploración física, CA19-9, analítica
  - Pruebas de imagen si clínica o elevación de marcadores
- Años 3 a 5:
  - Cada 6 meses: exploración física, CA19-9, analítica
  - Pruebas de imagen si clínica o elevación de marcadores

## Cancer de vías biliares

### I. DIAGNÓSTICO y ESTADIFICACIÓN

Se engloban los 2 subtipos de tumores: vías biliares intrahepáticos, extrahepáticos (colangiocarcinoma perihiliar o *tumor de Klastin* y colangiocarcinoma distal) y primario de vesícula biliar.

- **Exploración física.**
- **Análítica completa** con coagulación, función hepática, renal y marcadores tumorales (CA 19.9).
- **Estadía**. Clasificación TNM/AJCC, 7ª edición.
- **TC TAP y colangio-RM.** Para valoración de resecabilidad en Comité de Tumores y de obligada realización antes de cualquier procedimiento terapéutico.
- **CPRE.** Indicada para resolución de obstrucción de vía biliar de presentarse y permitiendo en el mismo procedimiento la toma de biopsias (citología por cepillado).
- **EUS.** Indicada para toma de muestras (PAAF) en caso de negatividad o resultado no concluyente.
- **Diagnóstico patológico:** Por bloque histológico (BAG)/citología, obligada en pacientes con enfermedad avanzada o irresecable. Como excepción, la biopsia confirmatoria no es obligada en aquellos pacientes con posibilidad de tratamiento curativo radical (por ej. Si PAAF por CPRE y/o EUS no concluyente) con el fin de no retrasar el tratamiento.
- **Valoración nutricional.** Si el paciente no ha sido derivado a Endocrinología/Nutrición desde Comité de Tumores, esta valoración debe realizarse durante la primera visita o posterior antes del inicio de tratamiento sistémico. Se empleará como método de cribado nutricional el denominado **Nutriscore** (ver protocolo de nutrición), que clasificará a los pacientes en 2 grupos en función de si presentan o no riesgo nutricional. Si Nutriscore  $\geq 5$ , derivar a Nutrición y realizar **VGS-GP** (Valoración Global Subjetiva Generada por Paciente) (anexo 2), que vuelve a clasificar al paciente en 3 grupos; si B (desnutrición moderada) o C (desnutrición severa).

### II. TRATAMIENTO

Valoración obligada en el Comité de Tumores, donde se establecerá en primer lugar las opciones de resecabilidad en tumores sin enfermedad M1.

#### II.1. ENFERMEDAD LOCALIZADA RESECABLE

- **CIRUGÍA RADICAL + LINFADENECTOMÍA.** El tipo de cirugía vendrá dado según la localización y el subtipo tumoral (*perihiliar/hiliar vs distal vs vesícula biliar*)
- **QUIMIOTERAPIA ADYUVANTE. Capecitabina** 1250 mg/m<sup>2</sup> vo D1 a D14 (1 ciclo c/21 días) por un total de 8 ciclos si ClCr 51-80 ml/min; dosis reducida (950 mg/m<sup>2</sup> si ClCr 31-50 ml/min). **ESMO-MCBS v1.1 B.** Indicada en pacientes:
  - PS 0-1

- Función renal con ClCr > 30 ml/min
- Resección R0/R1
- Colangiocarcinomas
- Tumores vía biliar,  $\geq$  pT1

## II.2. ENFERMEDAD IRRESECABLE Ó METASTÁSICA

### A. PRIMERA LINEA

Ofrecer en pacientes con diagnóstico histológico/citológico de adenocarcinoma, PS 0-2 con buena función hepática, medular, renal y expectativa de vida > 3 meses. Esquemas:

- **CISPLATINO + GEMCITABINA.** Pacientes con PS 0-1. Un ciclo c/21 días por un máximo de 10 ciclos:
  - Cisplatino 25 mg iv D1, D8
  - Gemcitabina 1000 mg/m<sup>2</sup> iv D1, D8

*\* Cisplatino puede ser sustituido por oxaliplatino de presentar contraindicación para el mismo o bien función renal que contraindique su uso.*

- **GEMCITABINA EN MONOTERAPIA.** Pacientes con PS 2 y/o comorbilidades, así como para pacientes con contraindicación para cisplatino. 1 ciclo c/28 días.
  - Gemcitabina 1000 mg/m<sup>2</sup> iv D1, D8, D14

### B. SEGUNDA LINEA

- **Inclusión en EC.**
- **XELOX.** Para pacientes con PS 0-1, < 70 años y sin comorbilidades. 1 ciclo c/21 días:
  - Capecitabina 1000 mg/m<sup>2</sup> vo D1 a D14
  - Oxaliplatino 130 mg/m<sup>2</sup> iv D1
- **CAPECITABINA EN MONOTERAPIA.** Pacientes con PS 2, > 70 años y/o comorbilidades leves/moderadas. Requiere ClCr 31-50 ml/min. 1 ciclo c/21 días.
  - Capecitabina 1000 mg/m<sup>2</sup> vo D1 a D14
- **De forma paralela inclusión en UCP y cuidados de soporte.**

## III. SEGUIMIENTO

- Pacientes sin enfermedad: Los primeros 2 años con Analítica con Ca 19.9 y exploración física cada 6 m y pruebas de imagen según hallazgos. Posteriormente anuales.
- Pacientes con enfermedad: Cada 3 meses con analítica con Ca 19.9 y exploración física. Pruebas según hallazgos e intención de tratamiento.

ANEXO: **ADENOCARCINOMA AMPULAR**

- Enfermedad metastásica → *ver vías biliares*
- Enfermedad localizada → cirugía mediante DPC. Valorar tratamiento con QUIMIOTERAPIA ADYUVANTE con esquema Gemcitabina 1000 mg/m<sup>2</sup> D1-8-15 cada 28 días por un total de 6 ciclos, en pacientes con:
  - Afectación ganglionar
  - Márgenes afectos
  - ≥ pT2



## Hepatocarcinoma

### I. DIAGNOSTICO y ESTADIFICACIÓN

- **Exploración física**
- **Analítica completa** con coagulación, función hepática, renal y alfafetoproteína.
- **Función hepática por score Child-Pugh**

| Items          | 1         | 2               | 3              |
|----------------|-----------|-----------------|----------------|
| ASCITIS        | Ausente   | Leve            | Moderada       |
| B. TOTAL       | > 2 mg/dl | 2-3 mg/dl       | <3 mg/dl       |
| ALBÚMINA       | >3.5 g/dl | 2.8-3.5 g/dl    | <2.8 g/dl      |
| T. PROTROMBINA | 1-3 seg   | 4-6 seg         | <6 seg         |
| ENCEFALOPATÍA  | Ausente   | Leve (grado1-2) | Moderada (3-4) |

\* Child-Pugh A: 5-6 puntos, Child-Pugh B: 7-9 puntos y Child-Pugh C: 10-15 puntos

- **Serología de virus hepatotropos:** VHB y VHC
- **Ecografía abdominal**
- **TC TAP**
- **TC/RM hepática trifásica:** Es típico y se trata de un signo altamente sensible y específico para el diagnóstico, la hipercaptación en fase arterial con lavado rápido en fase portal o lavado tardío. Este proceder es lo que se conoce como diagnóstico formal “no invasivo” de hepatocarcinoma, a utilizar sólo en pacientes cirróticos.
- **Biopsia guiada.** Entre las excepciones que podrían quedar exentas de realización de biopsia se encuentran:
  - Lesión focal en un hígado cirrótico cuando no se va a ofrecer ningún tipo de tratamiento activo por PS y/o comorbilidad grave.
  - Lesión foca en hígado cirrótico con cirrosis descompensada y en lista de espera de trasplante.
  - Lesión focal única en hígado cirrótico candidato a resección.
- **Estadíaje.** No hay consenso sobre cual clasificación predice mejores tasas de supervivencia y correlación pronóstica. El sistema de estadificación BCLC (BARCELONA CLINIC LIVER CANCER) está especialmente indicado en pacientes con cirrosis de base. Es el sistema de clasificación más usado en los países europeos. Aúna la extensión tumoral, la función hepática, y el estado general (PS).
  - ESTADIO 0: “Very early stage”
    - Tumor único < 2 cm
    - Child-Pugh A
    - PS 0
  - ESTADIO A: “Early stage”

- Tumor único ó 3 nódulos < 3 cm
- Child-Pugh A-B
- PS 0-1
- ESTADIO B: “Intermediate stage”
  - Enf. Voluminosa multinodular
  - Child-Pugh A-B
  - PS 0-1
- ESTADIO C: “Advanced stage”
  - Enf. Extrahepática o invasión vena porta
  - Child A-B
  - PS < 2
- ESTADIO D: “Terminal stage”
  - Enfermedad muy avanzada
  - Child-Pugh C
  - PS  $\geq 2$

## **II. TRATAMIENTO**

### **II.1. Very early & early stage (BCLC 0 y A):**

- HEPATECTOMIA PARCIAL. Si cumple criterios de no invasión vascular mayor, no hipertensión portal y con remanente hepático > 30-40% en cirróticos/ >20% en no cirróticos.
- TRASPLANTE HEPÁTICO. Si no cumple los anteriores criterios, pero sí los *Criterios de Milán* (HCC único < 5 cm o < 3 nódulos con suma < 3 cm, sin invasión macrovascular y sin enfermedad extrahepática, así como compromiso de abstinencia enólica radical.
- ABLACIÓN LOCAL POR RADIOFRECUENCIA\*. Con inyección percutánea de alcohol (PEI). Si se descartan las otras opciones de tratamiento.
- QUIMIOEMBOLIZACIÓN\*, RADIOEMBOLIZACIÓN ó RADIOTERAPIA (IMRT ó SBRT). Para pacientes con contraindicación para tratamiento radical curativo.

*\* Pueden también ser aplicadas en pacientes candidatos a trasplante hepático con lista de espera  $\geq 6$  meses.*

### **II.2. Intermediate stage (BCLC B):**

- QUIMIOEMBOLIZACIÓN TRANSARTERIAL. Función hepática y renal normal (ClCr > 30 ml/min), no invasión vascular mayor y no enfermedad extrahepática.
- RADIOEMBOLIZACIÓN. Función hepática normal, no enfermedad extrahepática, pero sí presencia de invasión vascular mayor.
- RADIOTERAPIA (IMRT, **SBRT**). Función hepática normal y no enfermedad extrahepática.

### **II.3. Advanced stage (BCLC-C):**

- **Inclusión en EC**

- **SORAFENIB.** 400 mg (2 comp. de 200 mg) cada 12 horas de forma continuada hasta progresión o toxicidad inaceptable. Se recomienda tomarlo en ayunas o con una comida moderada/baja en grasas; de lo contrario, 1 hora antes o 2 horas después. Cuando sea necesario disminuir la dosis durante el tratamiento, esta debe reducirse a 400 mg/día. Indicado en:
  - PS 0-1
  - Enfermedad avanzada o progresión de enfermedad locorregional tras tratamiento local.
  - Child-Pugh A.
  - Adecuada función hematológica (plaq > 60.000, Hb > 8.5, N Abs  $\geq$  1200/mm<sup>3</sup> INR < 2-3).
  - Adecuada función hepática (Alb > 2,8, Btotal < 3 mg/dl, GOT/FPT < 5 veces LSN).
  - Adecuada función renal (creatinina < 1,5 mg/dl).
- **CABOZANTINIB.** 60 mg una vez al día, hasta progresión o toxicidad inaceptable. **ESMO-MCBS v1.1 3.**
  - Estadio B o C según los criterios BCLC.
  - Child-Pugh A.
  - PS  $\leq$  1
  - Adecuada función hematológica (plaq > 60.000, Hb > 8.5, N Abs  $\geq$  1200/mm<sup>3</sup> INR < 2-3).
  - Adecuada función hepática (Alb > 2,8, Btotal < 3 mg/dl, GOT/FPT < 5 veces LSN).
  - ClCr  $\geq$  30 ml/min, ausencia de proteinuria
  - No trasplante hepático previo.
  - No ser candidato a trasplante hepático.
  - Esperanza de vida de al menos 3 meses.
  - Progresión radiológica a sorafenib.
  - Ausencia de varices esofágicas con riesgo de sangrado o sin tratar.
  - Ausencia de Hipertensión arterial no controlada.
  - NYHA  $\leq$  1.
- **REGORAFENIB.** 160 mg/día durante 3 semanas seguido de 1 semana sin tratamiento, hasta progresión o toxicidad inaceptable. La dosis mínima diaria recomendada es de 80 mg/día. **ESMO-MCBS v1.1 4.**
  - Estadio B o C según los criterios BCLC.
  - Child-Pugh A.
  - PS  $\leq$  1
  - Adecuada función hematológica (plaq > 60.000, Hb > 8.5, N Abs  $\geq$  1200/mm<sup>3</sup> INR < 2-3).
  - Adecuada función hepática (Alb > 2,8, Btotal < 3 mg/dl, GOT/FPT < 5 veces LSN).
  - ClCr  $\geq$  30 ml/min, ausencia de proteinuria
  - Ausencia de derrame pleural o ascitis
  - Ausencia de enfermedad pulmonar intersticial
  - No trasplante hepático previo
  - No ser candidato a trasplante hepático
  - Esperanza de vida de al menos 3 meses.

- Progresión radiológica a sorafenib.
- Haber tolerado sorafenib: al menos un comprimido cada 24 horas durante 20 días antes de discontinuar.
- Ausencia de varices esofágicas con riesgo de sangrado o sin tratar.
- Ausencia de Hipertensión arterial no controlada.
- NYHA  $\leq 1$ .
- Arritmia cardíaca en tratamiento con antiarrítmicos diferentes a beta-bloqueantes o digoxina.

#### **II.4. Terminal stage (BCLC D):**

- **Inclusión en UCP para mejores cuidados de soporte.**

## Cáncer colorrectal

### I. ANATOMÍA DEL COLON

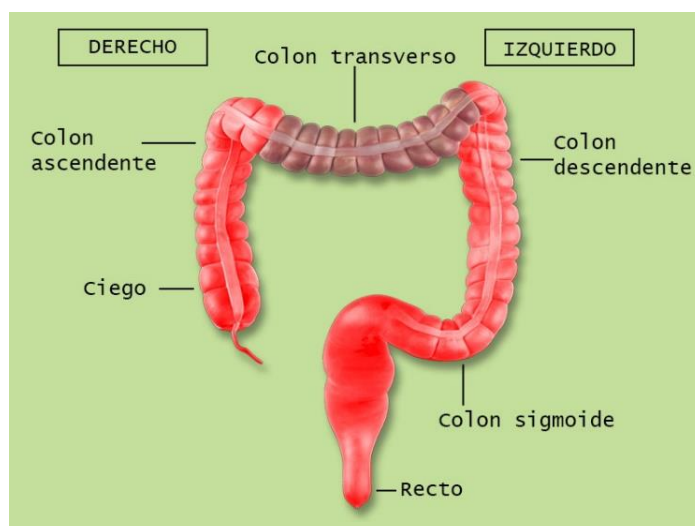

#### **I.1. CANCER DE COLON LOCALIZADO**

##### **I.1.A. ESTUDIO DE EXTENSION:**

###### **PRECIRUGÍA:**

- Anamnesis y Exploración física
- Analítica con hemograma, bioquímica completa, y marcadores tumorales: CEA y CA 19.9
- Colonoscopia completa con biopsias
- TAC TAP

###### **POSTCIRUGÍA:**

- Exploración física.
- Analítica con hemograma, bioquímica completa, y CEA
- TAC TAP: si no se realizó preoperatoriamente. Valorar repetir si transcurrieron más de 8 semanas del anterior y riesgo alto de recidiva.
- Colonoscopia: si no se realizó preoperatoriamente (puede demorarse hasta el fin de la QT adyuvante si procede).

Realización de inestabilidad de microsatélites a TODOS los pacientes con cáncer colorrectal.

Valorar CDX2 en estadios II

Valoración riesgo hereditario

### I.1.B ESTADIFICACIÓN: UICC TNM (8ª Edición).

#### I.1.C TRATAMIENTO POR ESTADIOS:

- **ESTADIO 0** (Tis, N0, M0): Escisión local o polipectomía simple.
- **ESTADIO I** (T1-2, N0, M0): Cirugía.
- **ESTADIO II** (T3, N0, M0; T4a-b, N0, M0): Valorar quimioterapia adyuvante en pacientes con al menos uno de los criterios de alto riesgo.

(Discusión entre el paciente y el médico sobre los riesgos potenciales de la quimioterapia adyuvante en comparación con los beneficios potenciales, incluido el pronóstico)

Criterios de Alto Riesgo:

- pT4
- Pobremente diferenciados.
- Menos de 12 ganglios en la pieza quirúrgica.
- Invasión vascular venosa o linfática o perineural.
- Presentación del tumor con obstrucción.
- Perforación tumoral.

Opciones de quimioterapia:

- Capecitabina x 8 ciclos: De elección
- XELOX o Folfox x 6 meses en T4
- Valorar añadir oxaliplatino en pacientes T3 con muy alto riesgo.

En los pacientes con estadios II y dMMR o MSI-H ((alta IMS):

- Seguimiento (opción preferente)
- Pobremente diferenciado no es un factor de riesgo por si solo
- Si tratamiento quimioterapico no administrar 5FU solo

- **ESTADIO III** (Cualquier T, N1-2, M0): QT adyuvante:

- Pacientes < 70 años: XELOX x 8 ciclos o FOLFOX6m x 12 ciclos (6 meses).
- Pacientes ≥ 70 años: Capecitabina x 8 ciclos (6 meses).
  - En aquellos pacientes de ≥ 70 años, con PS 0-1, sin comorbilidad y con alto riesgo de recidiva (IIIB-IIIC): valorar XELOX x 8 ciclos o FOLFOX6m x 12 ciclos (6 meses).

En pacientes con bajo riesgo de recaída (T1-3, N1), valorar administrar 4 ciclos de XELOX (3 meses).

### Esquemas de quimioterapia adyuvante para estadios II-III:

Capecitabina: 1250 mg/m<sup>2</sup> cada 12 horas D1-14 cada 21 días

LV5FU2 simplificado (De Gramont) (1 ciclo cada 14 días)

- AF: 400 mg/m<sup>2</sup> (o Levofolínico 200 mg/m<sup>2</sup>), D1
- 5-FU: 400 mg/m<sup>2</sup> en bolo, D1
- 5-FU: 2400 mg/m<sup>2</sup> en IC de 46 horas, D1

Folfox6m: 1 ciclo cada 14 días

- Oxaliplatino: 85 mg/m<sup>2</sup> en 2 horas, D1
- AF: 400 mg/m<sup>2</sup> (o Levofolínico 200 mg/m<sup>2</sup>) D1
- 5-FU: 400 mg/m<sup>2</sup> bolo D1
- 5-FU: 2400 mg/m<sup>2</sup> en IC de 46 horas, D1

XELOX (1 ciclo cada 21 días x 8 ciclos)

- Oxaliplatino 130 mg/m<sup>2</sup> en 2 horas, D1
- Capecitabina 1000 mg/m<sup>2</sup> cada 12 horas, D1-14

## **II. ANATOMÍA DEL RECTO**

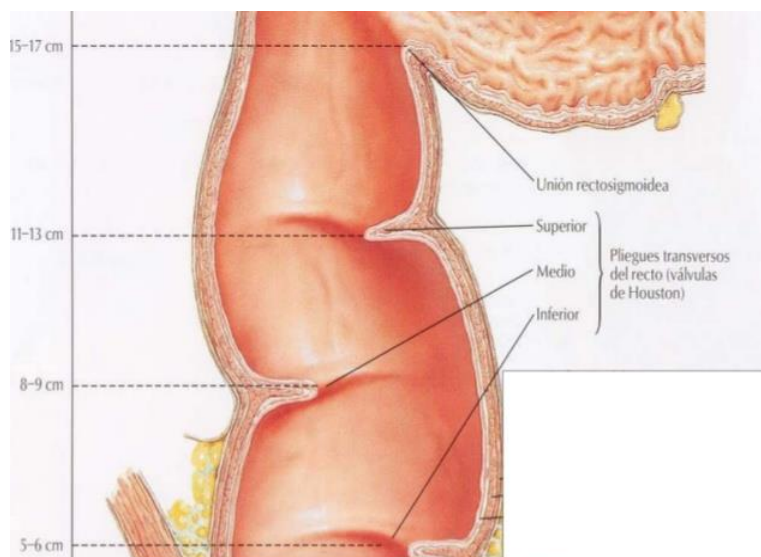

### **II.1. CANCER DE RECTO LOCALIZADO**

Discutir caso en comité multidisciplinar.

## II.1.A ESTUDIO DE EXTENSION:

- Exploración física incluyendo tacto rectal y cadenas ganglionares inguinales.
- Analítica con hemograma, bioquímica, CEA.
- Colonoscopia completa con biopsias. Si es incompleta valorar colonoscopia virtual.
- TAC TAP.
- RMN pelvis incluyendo la descripción del margen circunferencial +/- eco endoscopia

Nota: Sólo se realizará re-evaluación con RMN pélvica tras fin de la neoadyuvancia en aquellos casos considerados irresecables al diagnóstico.

## II.1.B ESTADIFICACIÓN: UICC TNM (8ª Edición)

## II.1.C TRATAMIENTO POR ESTADIOS:

### - CÁNCER DE RECTO RESECADO DE ENTRADA:

- **ESTADIO I** (cT1-T2, N0,M0):
  - Operado con cirugía completa radical: Seguimiento.
  - Operado con excisión local endoanal:
    - pT1 sin factores de riesgo : Seguimiento.
    - pT1 con factores de riesgo (**se consideran factores de riesgo:** pobremente diferenciados (**salvo MSI**), invasión vascular venosa o linfática, márgenes positivos (<2mm), invasión submucosa hasta tercio inferior (sm3)): y todos los pT2: valorar en primer lugar la cirugía completa radical (con escisión total de mesorrecto), y como alternativa el tratamiento adyuvante (QT-RT, RT sólo o Braquiterapia).

- **ESTADIO IIA** (T3, N0,M0): Se valorará con el paciente la relación riesgo/beneficio incluyendo el estado del margen circunferencial y según características del paciente, características del tumor (alto/bajo) y riesgo de enteritis.

Capecitabina: 1250 mg/m<sup>2</sup> cada 12 h x 14 días cada 21 días x 2 ciclos.

QT-RT: 50 Gy (2 Gy/sesión x 5 sesiones/semana) + capecitabina: 825 mg/m<sup>2</sup> cada 12 h concomitante los días de la RT (de lunes a domingo).

Capecitabina 1250 mg/m<sup>2</sup> cada 12 h x 14 días cada 21 días x 3 ciclos.

T3N0M0 con bajo riesgo de recaída locoregional: pT3 pN0 (R0), G1-2, grado de invasión grasa mesorrectal < 5 mm, tumores tercio superior-medio, no invasión vásculo-linfática: Valorar seguimiento u omitir RT: capecitabina 1250 mg/m<sup>2</sup> cada 12 horas D1-14 cada 21 días x 8 ciclos.

- **ESTADIOS IIB (T4, N0, M0) y III (T1-4, N1-2b, M0):**
  - Opción 1: Ver estadio IIA
  - Opción 2: Valorar en Peor pronóstico (T4 o N2) Folfox4 x 3 ciclos o Xelox x 2 ciclos seguido de, RT/QT con capecitabina o 5FU en IC seguido de Folfox3 x 4 ciclos o Xelox x 2 ciclos



- CÁNCER DE RECTO NO RESECADO:

- **ESTADIO I:** Cirugía.
- **ESTADIOS II-III (resecables)**

QT-RT PREOPERATORIA: RT preoperatoria (50 Gy a 2 Gy/sesión, 5 semanas)+ Capecitabina 1650 mg/m<sup>2</sup>/24h repartido en 2 tomas (825mg/m<sup>2</sup>/12h) continuo durante la radioterapia (de lunes a domingo).

Como alternativa en paciente que no la tolere: 5FU225 mg/m<sup>2</sup>/d en infusión continua durante el tratamiento radioterapico.

A las 6-8 semanas de finalizar QT-RT se procederá a Cirugía (con escisión total del mesorecto)

A valorar QT adyuvante:

- Capecitabina x 5 ciclos
- Valorar XELOX x 5 o FOLFOX6m x 8 ciclos (4 meses) en estadios patológicos IIB-IIIB-IIIC o N+

**En tumores irresecables o T4 comenzar con XELOX o FOLFOX y posteriormente (tras 3-4 ciclos) QT-RT.**

Valorar RT curso corto: En pacientes operables resecables que cumplan TODOS los criterios : Tumores tercio superior-medio/ Previsible CRM > 2mm/ cN0-1 sin afectación extranodal. Si clínica obstructiva que imposibilite curso largo de RT.

**ESTADIOS II-III en pacientes NO candidatos a tratamiento quimioterápico:**

- Resecables:  
Radioterapia preoperatoria exclusiva con esquema corto 5Gy x 5 sesiones (lunes a viernes) seguido de cirugía inmediata a los 7-10 días vs Cirugía de entrada según toxicidad esperable.  
Demorar la cirugía hasta las 8 semanas en pacientes frágiles o de > 80 años.
- Irresecables:  
RT larga exclusiva preoperatoria con valoración de cirugía a las 4-6 sem.

RT esquema corto 5 x 500 cGy y valoración de resecabilidad a las 8 semanas.

- RECIDIVA LOCAL CÁNCER DE RECTO:

Valorar en comité multidisciplinar la posibilidad de rescate quirúrgico.

- Enfoque curativo:

- Si NO recibió RT, se puede considerar: QTRT preoperatoria dosis estándar (45–50 Gy en 5–6 semanas) antes de un intento de resección por equipo especializado.

- Si recibió RT: Reirradiación a dosis más bajas (con QT concomitante) se puede usar en pacientes seleccionados para facilitar una resección curativa o sola para paliar los síntomas.

- Quimioterapia para intentar reducir estadio.

- Enfoque paliativo:
  - Reirradiación a dosis más bajas, en pacientes previamente irradiados.
  - QT paliativa.
  - Valorar derivación quirúrgica paliativa en pacientes con una esperanza de vida razonable.

### **III. CANCER COLORRECTAL METASTÁSICO:**

#### **III.1 VALORACIÓN PREVIA A DECIDIR TRATAMIENTO:**

- A. Evaluación general y nutricional del paciente: Estado general (PS), comorbilidades (número y severidad), clínica actual (primario sintomático), analítica con hemograma, bioquímica completa, CEA y CA 19.9.
- B. Valorar en Comité Oncológico multidisciplinar situación de presentación de la enfermedad con colonoscopia y estudios de imagen TAC torax-abdomen-pelvis definiendo si el paciente se presenta con:
  - Enfermedad metastásica resecable.
  - Enfermedad potencialmente resecable.
  - Enfermedad irresecable.
- C. Estudio completo de biomarcadores pronósticos / predictivos: Determinación de estado mutaciones de RAS, BRAF. (AP y biopsia líquida) Así como de la inestabilidad microsatélite.
- D. Si riesgo alto de obstrucción intestinal: Insistir en hábito intestinal y aconsejar dieta sin residuos. **Valorar colocación previa de prótesis , resección del tumor primario o colostomía**

#### **III.2 CLASIFICACIÓN:**

##### **A. RESECABLES:** Valorar según factores de riesgo del score clínico:

- Intervalo libre de enfermedad <12 meses.
- Múltiples metástasis (>1).
- CEA > 200.
- Tamaño de metástasis > 5 cm.
- Tumor primario con ganglios positivos.
  - BAJO RIESGO: score ≤ 2.
  - ALTO RIESGO: score ≥ 3.

Considerar PET si la enfermedad se considera potencialmente curable en casos seleccionados. Evaluación del equipo multidisciplinario, que incluye a un cirujano con experiencia en la resección de metástasis hepatobiliares y pulmonares

##### **B. POTENCIALMENTE RESECABLES**

##### **C. IRRESECABLES.**

**III.3 TRATAMIENTO SEGÚN CLASIFICACIÓN:****III.3.A RESECABLES:**

- **BAJO RIESGO:** Cirugía seguida de quimioterapia adyuvante según esquema XELOX o FOLFOX6m adyuvante x 6 meses. III-B.  
ALTO RIESGO: XELOX o FOLFOX6m perioperatorio (durante 3 meses antes de la cirugía y durante 3 meses después). (estudio EPOC). Escala Magnitud de Beneficio clínico ESMO-MCBS 3 Form 1: Grado B
- \*\* Valorar en comité multidisciplinar la posibilidad tratamientos locales

**III.3.B POTENCIALMENTE RESECABLE:**

- RAS o BRAF MUTADO Y COLON DERECHO
- RAS o BRAF MUTADO Y COLON Izqdo. o Recto
- RAS y BRAF NATIVOS y COLON DERECHO

|                                                                                                                                                        |
|--------------------------------------------------------------------------------------------------------------------------------------------------------|
| PRIMERA LINEA                                                                                                                                          |
| Folfox6 m o Xelox ± Bevacizumab. II, A. (CALGB)                                                                                                        |
| Folfoxiri ± Bevacizumab pacientes con PS 0-1 y ausencia de comorbilidades. ESMO-MCBS 3 Form 2b: Grado 2 ISG sólo hasta 75 años y con ECOG 0 de 71-75 a |

- Administrar durante los mínimos ciclos necesarios para la conversión en resecable (se recomienda re-evaluar a los 4 - 6 ciclos).
- Tras la cirugía con resección completa, completar 6 meses de misma QT sin biológico.
- RAS Y BRAF NATIVO Y COLON IZQUIERDO / Recto

|                                         |
|-----------------------------------------|
| PRIMERA LINEA                           |
| Folfox + Panitumumab. (prime EC Fase)   |
| Folfiri + Cetuximab . (cristal, FIRE 3) |
| Folfox + Cetuximab (opus, CALGB)        |

**III.3.C IRRESECABLES (FIT)**

- PRIMERA LÍNEA

**Misma estrategia que en el potencialmente resecable con evaluación de tres posibilidades tras 4 a 6 meses de tratamiento, y según carga tumoral, toxicidad y deseo del paciente:**

- **Mantenimiento con FU Beva o Fu anti-EGFR o FU en función del esquema utilizado hasta progresión**
- **Vacaciones de tratamiento hasta progresión**

VALORAR RE-TRATAMIENTO con mismo esquema: si hubo respuesta previa y se observó ILP desde fin de QT > 4-6 meses.

## - SEGUNDA LÍNEA

- RAS o BRAF MUTADO Y COLON DERECHO
- RAS o BRAF MUTADO Y COLON Izqdo. o Recto
- RAS y BRAF NATIVOS y COLON DERECHO

|                                                 |
|-------------------------------------------------|
| Opciones 2ª línea en función 1ª línea           |
| Folfiri +/- Bevacizumab (ML 18147, CALGB 80405) |
| Folfox +/- Bevacizumab Grado 2 (E3200)          |
| Folfiri + Aflibercept Grado 1 (VELOUR)          |

- RAS Y BRAF NATIVO y colon izqdo.. o Recto

| PRIMERA LINEA                      | SEGUNDA LINEA opciones                                                                   |
|------------------------------------|------------------------------------------------------------------------------------------|
| Si anti-EGFR en 1ª línea           | Folfiri+/- Bevacizumab<br>Folfiri + Aflibercept                                          |
|                                    | Folfox +/- Bevacizumab                                                                   |
| Si anti-VEGF o QT sola en 1ª línea | Mismos esquemas que si Anti EGFR en primera<br>FOLFIRI o FOLFOX- panitumumab o cetuximab |

## TERCERA LÍNEA

Valorar si PS 0-1, y respuesta a tratamientos previos.

- Pacientes MSS

Realizar TAC de evaluación antes del tercer ciclo (en la semana 4 del ciclo 2) y luego cada 2 ciclos

**Trifluridina tipiracil (TAS-102)** 35 mg/m<sup>2</sup>/dosis, administrada por vía oral dos veces al día en los Días 1 al 5 y Días 8 al 12 de cada ciclo de 28 días. Escala Magnitud de Beneficio clínico ESMO-MCBS Form 2a: Grado 2.

- Pacientes MSI

A valorar Nivolumab o Nivolumab – Ipilimumab (M.J Overman Lancet 2017 y JCO 2018 y ASCO GI 2019)

Rechallenge: En colon izquierdo: Si RP a primera línea con anti- EGFR, tratamiento de segunda línea superior a 4-6 meses y ctDNA nativo: Valorar de nuevo anti- EGFR

**III.3.D IRRESECABLE PACIENTE FRÁGIL**

PS2, dependencia, comorbilidades, polimedicados...

En cualquier caso y en esta población si se administra tratamiento valorar desde el inicio con dosis reducidas (no se asociará biológico cuando se administre FOLFIRI, FOLFOX O XELOX).

- RAS o BRAF MUTADO Y COLON DERECHO
- RAS o BRAF MUTADO Y COLON Izqdo. o Recto

- RAS y BRAF NATIVOS y COLON DERECHO

|                                           |
|-------------------------------------------|
| Opciones primera y segunda linea          |
| Folfox o Xelox                            |
| Folfiri                                   |
| Capecitabina ± bevacizumab Grado 3 (AVEX) |

- RAS Y BRAF NATIVO y colon izqdo.. o Recto

|                                     |
|-------------------------------------|
| Opciones de primera y segunda linea |
| Folfox o Xelox                      |
| Folfiri                             |
| Irinotecan +/- cetuximab            |
| Capecitabina ± bevacizumab          |
| Cetuximab o Panitumumab             |

#### III.4 RADIOTERAPIA PARA CÁNCER DE RECTO METASTÁSICO:

**Valorar en casos seleccionados, que sean candidatos** a cirugía radical, con alto riesgo de recidiva local (tumores bajos, T3-T4 y/o N+) y baja carga tumoral a distancia. Se usará RT con esquema corto. DT: 25 Gy (5 x 500 cGy)

#### III.5 ESQUEMAS DE TRATAMIENTO PARA EL CÁNCER COLORRECTAL METASTÁSICO:

##### **FOLFOX 6 modificado (FOLFOX6m)** (1 ciclo cada 2 semanas)

Oxaliplatino: 85 mg/m<sup>2</sup> en 2 horas, D1

AF: 400 mg/m<sup>2</sup> (o Levofolínico 200 mg/m<sup>2</sup>) en 2 horas, en Y con oxaliplatino, D1

5-FU: 400 mg/m<sup>2</sup> bolo D1

5-FU: 2400 mg/m<sup>2</sup> en IC de 46 horas, D1

##### **XELOX** (1 ciclo cada 21 días x 8 ciclos)

Oxaliplatino 130 mg/m<sup>2</sup> en 2 horas, D1

Capecitabina 1000 mg/m<sup>2</sup> cada 12 horas, D1-14

##### **FOLFIRI SIMPLIFICADO** (1 ciclo cada 2 semanas)

CPT-11: 180 mg/m<sup>2</sup> en 30 a 90 minutos, D1 ISG 150 mg/m<sup>2</sup> en > 70 a

AF: 400 mg/m<sup>2</sup> (o Levofolínico 200 mg/m<sup>2</sup>) D1

5-FU: 400 mg/m<sup>2</sup> Bolo, D1

5-FU: 2400 mg/m<sup>2</sup> en IC 46 horas, D1

##### **FOLFOXIRI** (1 ciclo cada 2 semanas)

CPT-11: 165 mg/m<sup>2</sup> D1

Oxaliplatino: 85 mg/m<sup>2</sup> D1

AF: 400 mg/m<sup>2</sup> en 2 horas (o Levofolínico 200 mg/m<sup>2</sup>), D1

5-FU: 3200 mg/m<sup>2</sup> en IC 48 horas, D1

**LV5FU2 simplificado (De Gramont)** (1 ciclo cada 2 semanas)

AF: 400 mg/m<sup>2</sup> (o Levofolínico 200 mg/m<sup>2</sup>) en 2 horas, D1

5-FU: 400 mg/m<sup>2</sup> bolo, D1

5-FU: 2400 mg/m<sup>2</sup> en IC de 46 horas, D1

**Raltitrexed (Tomudex)** (en caso de contraindicación al 5-FU por cardiopatía isquémica):

3 mg/m<sup>2</sup> cada 21 días (Aclaramiento de creatinina > 50 ml/min) ISG según ficha técnica del tomudex:

Si ccreat >65 ml/m dosis 100%

Si ccreat 55-65ml/m 75% dosis CADA 4 SEMANAS

Si Ccreat 25-54 ml/m 50% dosis cada 4 semanas

Si ccreat < 25 no poned

**Raltitrexed (Tomudex) + Oxaliplatino** (1 ciclo cada 21 días): En carcinoma colorrectal metastásico con contraindicación a 5FU (defecto de DPD o cardiopatía isquémica)

Tomudex: 3 mg/m<sup>2</sup> (Aclaramiento de creatinina > 50 ml/min) ISG ved previo

Oxaliplatino: 130 mg/m<sup>2</sup> D1

**Irinotecan en monoterapia**

180 mg/m<sup>2</sup> cada 2 semanas ISG en mayores de 70 años 150mg/m<sup>2</sup> ó

350 mg/m<sup>2</sup> cada 3 semanas

**Cetuximab**

Semanal: 400 mg/m<sup>2</sup> (1ª dosis) seguido de 250 mg/m<sup>2</sup> semanal.

Cada 2 semanas: 500 mg/m<sup>2</sup>.

**Panitumumab:** 6 mg/kg cada 2 semanas.

**Bevacizumab:** 5 mg/Kg cada 2 semanas o 7.5 mg/Kg cada 3 semanas.

**Aflibercept :** 4 mg/kg cada 2 semanas.

**IV. SEGUIMIENTO****IV.1 SEGUIMIENTO DEL CÁNCER COLORRECTAL LOCALIZADO:****ESQUEMA DE SEGUIMIENTO:**

|                                | <b>1º - 2º año</b>                    | <b>3er año</b> | <b>4º y 5º año</b> | <b>&gt; 5º año</b> |
|--------------------------------|---------------------------------------|----------------|--------------------|--------------------|
| Anamnesis y exploración física | Cada 6 meses<br>Si T4 o N2 cada 4 mes | Cada 6 meses   | Anual              | Alta               |
| Analítica con CEA              | Cada 6 meses<br>Si T4 o N2 cada 4 mes | Cada 6 meses   | Anual              | Alta               |
| TAC* TAP                       | Anual                                 | Cada 6 meses   | Anual              | Alta               |

PET: A valorar si CEA elevado en al menos dos determinaciones sucesivas con exploración física, TAC TAP y colonoscopia normales.

ENDOSCOPIA : Ver apartado IV.2

*#A partir del 5º año, en pacientes sin evidencia de recidiva: Alta y, seguirán controles por Atención Primaria. Ante sospecha de recidiva, se derivará de nuevo al especialista con informe / petición de su médico de Atención Primaria.*

**IV.2 SEGUIMIENTO ENDOSCÓPICO:**

- Estudio preoperatorio no óptimo:
  - Colonoscopia intraoperatoria ó
  - Colonoscopia en los 3 - 6 meses tras tratamiento con intención curativa
- Estudio preoperatorio óptimo: Colonoscopia completa al año, siguiente a los 3-5 años, si la previa normal. Posterior a los 5 años, si la previa normal.
- Si en las colonoscopias se detectaran lesiones el seguimiento se hará en función de los resultados de las mismas\* (Figura que aparece en el protocolo de Hospital Clínico, ver al final).
- Cáncer de Recto no radiados: Añadir rectosigmoidoscopia a los 6 meses y luego valorar cada 6 meses durante los 2-3 primeros años (se incluiría en la colonoscopia completa cuando esta proceda).

**IV.3 SEGUIMIENTO DEL CÁNCER COLORRECTAL METASTÁSICO RESECADO**

Analítica y CEA cada 3 meses y TAC cada 6 meses los 3 primeros años, y posteriormente anual.

## Carcinoma de ano

### I. ESTUDIO DE EXTENSIÓN.

- Anamnesis y Exploración física con tacto rectal.
- Hemograma, Bioquímica, CEA.
- Serología VIH.
- Rx de Tórax PA y L.
- TAC abdominopélvico.
- Anuscopya con Biopsia, especificando tamaño y localización de la lesión.
- RNM pélvica con difusión.
- Colocación de port a cath.
- En mujeres exploración ginecológica.
- Valorar recogida de semen. y en mujeres jóvenes preservación de ovocitos.
- En guías recientes se aconseja PET TAC para poder definir mejor la afectación ganglionar. Sobre todo en T1 en que no se va a realizar QT concomitante.

### II. ESTADIFICACIÓN: AJCC/UICC TNM (7ª Edición)

### III. TRATAMIENTO.

#### - T1:

- Margen anal, G1? Excisión local
- Canal anal ? Radioterapia exclusiva

#### - RESTO: Radioquimioterapia

- 5-FU 1000 mg / m<sup>2</sup> / d en IC días 1 a 4 y 28 a 31.
- MMC 10 mg / m<sup>2</sup> / día 1 y 28
- RT concomitante (50-60Gy)

En pacientes con comorbilidades severas o HIV positivo con recuento de CD4 <200 céls/ml valorar radioterapia en solitario o reducción de dosis de quimioterapia.

### Evaluación de respuesta tras radioquimioterapia:

**ANUSCOPIA y biopsia del lecho tumoral** a las 8 semanas de finalizar la RT.

- Si pRC: seguimiento
- Si RP: seguimiento cada seis semanas hasta las 26 semanas del inicio de tratamiento. si persiste enfermedad confirmada con biopsia: Cirugía.



- Si EE o progresión: Cirugía
- Si recidiva local amputación abdominoperineal.

#### **Metastásicos:**

Valorar tratamiento quirúrgico en los pacientes resecables tras evaluación en comité multidisciplinar.

- Quimioterapia de elección:
  - Carboplatino / Paclitaxel (InterAACT ESMO 2018)
  - Carboplatin: AUC 5 Día 1 cada 28 días
  - Paclitaxel: 80 mg/m<sup>2</sup> días 1, 8, 15 cada 28 d
- Control sintomático: Control del dolor (valorar bloqueos nerviosos, radioterapia antiálgica), cuidado de la piel, cirugía en fístulas (si expectativa de vida razonable).

#### **IV. SEGUIMIENTO:**

- Primer año:
  - Analítica con CEA y EF cada 3 meses.
  - Anuscopia cada 6 meses (después de respuesta completa).
  - Rx tórax y TAC abdominopélvico cada 6 meses
- Segundo y tercer año: Todo cada 6 meses.
- A partir del tercer año: Todo anual.
- A partir del quinto año valorar alta a Médico de Familia.

## Cáncer de ovario, trompa y primario peritoneal

### I. DIAGNÓSTICO Y ESTUDIO DE EXTENSIÓN

- Anamnesis y exploración física-ginecológica.
- Analítica sanguínea general, con marcadores: Ca125 (no mucinoso) o Ca 19.9 (mucinoso).
- Rx tórax.
- TAC abdominopélvico.
- Laparotomía reglada (diagnóstica, de estadaje y terapéutica):
  - Inspección cuidadosa y palpación de todas las superficies peritoneales.
  - Lavado peritoneal para estudio citológico o toma de muestra de líquido ascítico.
  - Histerectomía abdominal total con salpingo-ooforectomía bilateral. La salpingo-ooforectomía unilateral está permitida en pacientes jóvenes con estadio IA que desean mantener su fertilidad.
  - Biopsia de cualquier lesión sospechosa de metástasis tumoral.
  - Omentectomía infracólica.
  - Biopsia o resección de cualquier adherencia adyacente al tumor primario.
  - Biopsia a ciegas (>2) del peritoneo vesical y fondo de saco.
  - Biopsias a ciegas (>3) de los repliegues paracólicos derecho e izquierdo.
  - Biopsias a ciegas (>2) o extensiones para citología del hemidiafragma derecho.
  - Biopsias a ciegas (>2) del peritoneo de la pared pélvica adyacente al tumor primario (fosa ovárica).
  - Muestreo ganglionar a lo largo de las arterias y venas ilíacas externas y comunes.
  - Muestreo ganglionar a lo largo de la aorta y de la vena cava, incluyendo el nivel entre la arteria mesentérica inferior y la vena renal izquierda.
  - Linfadenectomía en estadios iniciales.
  - En estadios avanzados, si la cirugía es R0 y no hay sospecha macroscópica de afectación ganglionar: no es necesario la linfadenectomía.
  - Apendicetomía en cáncer con histología mucinosa.
  - En estadios avanzados se hará citorreducción lo más amplia posible, describiendo meticulosamente la localización y diámetro de las lesiones que se encuentren y de las que quedan tras la citorreducción.

En pacientes con carcinoma de ovario, primario peritoneal o de Trompas de Falopio, de alto grado, seroso o endometrioide y estadio avanzado (III, IV): realizar circuito rápido de detección BRCA 1/2 (estudio SOLO-1).

## II. TRATAMIENTO

### II.a. Tratamiento estadio I

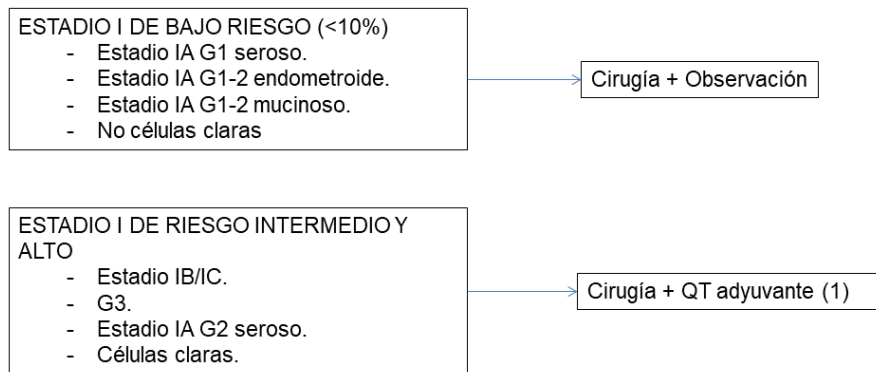

(1) Paclitaxel-carboplatino x 3-6 ciclos vs carboplatino x 6 ciclos.

Seis ciclos de QT en:

- Estadios IC (de cualquier histología).
- Tumores serosos.
- Pacientes que reciben adyuvancia con carboplatino en monoterapia.

### II.b. Tratamiento estadio II-IV

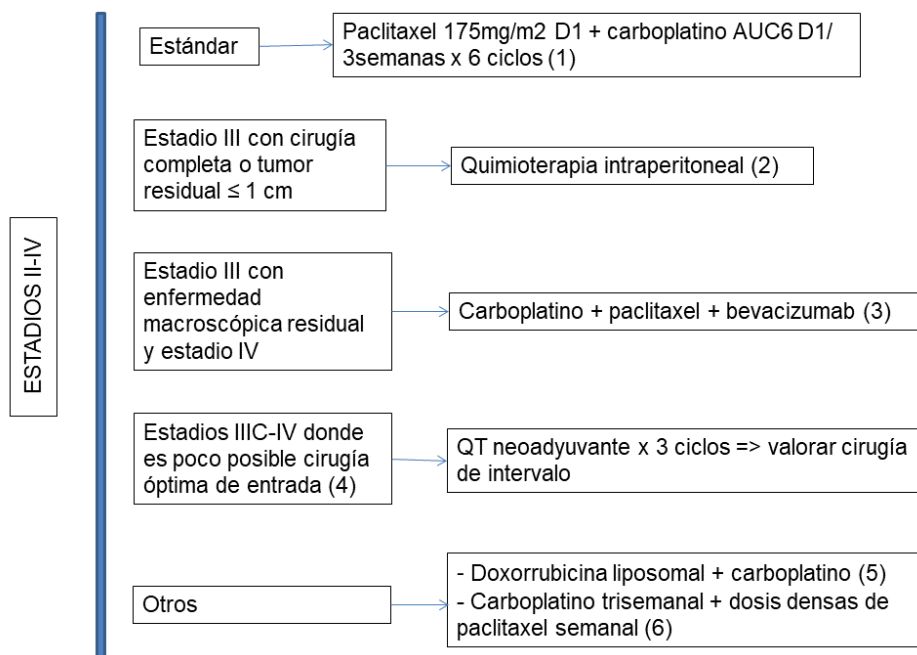

(1) Pacientes > 70 años, carboplatino AUC5.

Si reacción alérgica a carboplatino no superable con los protocolos adecuados de premedicación y prolongación de la infusión, contactar con Servicio de Alergología.

(2) Paclitaxel 175mg/m2 IV en 3h D1

CDDP 75mg/m2 IP D2, con pre y posthidratación IV e IP.

Paclitaxel 60mg/m2 IP D8.

Ciclos cada 3 semanas x 6 ciclos.

(3) Paclitaxel 175mg/m<sup>2</sup> en 3h.

Carboplatino AUC5 ó 6, en 30-60 min.

Bevacizumab 15mg/kg iv, empezando con el 2º ciclo de QT y hasta un total de 15 meses (estudio GOG218).

Cada 3 semanas x 6 ciclos.

### MCBSv1.1: 3

(4) Plantear laparoscopia exploradora previa a la cirugía para valorar la posibilidad de cirugía R0.

(5) Opción en 1ª línea en pacientes que no acepten la alopecia, con neuropatía o alérgicos a paclitaxel.

(6) Carboplatino AUC6/3semanas.

Paclitaxel 80mg/m<sup>2</sup> D1, 8 y 15/3 semanas.

x 6 ciclos.

## II.c. Tratamiento de la recaída

Cirugía de rescate si:

- Recaída localizada.
- Buen estado general.
- Intervalo libre de tratamiento prolongado.
- Sin ascitis.
- Posibilidad de resección completa.

ILP > 6 meses  
(especialmente  
> 12meses)

De elección: Carboplatino AUC4 D1 + gemcitabina 1000mg/m<sup>2</sup> D1y8/3semanas.  
- Valorar añadir bevacizumab, si no lo recibió en 1º línea. (1)

Carboplatino AUC5 D1 + paclitaxel 175mg/m<sup>2</sup> D1/3semanas.

Carboplatino AUC5 D1/3semanas + paclitaxel 60mg/m<sup>2</sup> semanal.

Carboplatino AUC5 D1 + DLP 30mg/m<sup>2</sup> D1/28días.

Carboplatino AUC5 D1 + docetaxel 60-75mg/m<sup>2</sup>/ 3semanas.

Carboplatino AUC5 trisemanal, monoterapia.

Olaparib 400mg/12h de mantenimiento tras respuesta a terapia con platino en BRCA 1-2 somática o germinal. (2)

(1) Bevacizumab 15mg/m<sup>2</sup> /3semanas, empezando el 2º ciclo QT y tras QT hasta progresión o toxicidad inaceptable.

MCBSv1.1: 3

(2) MCBSv1.1: 3

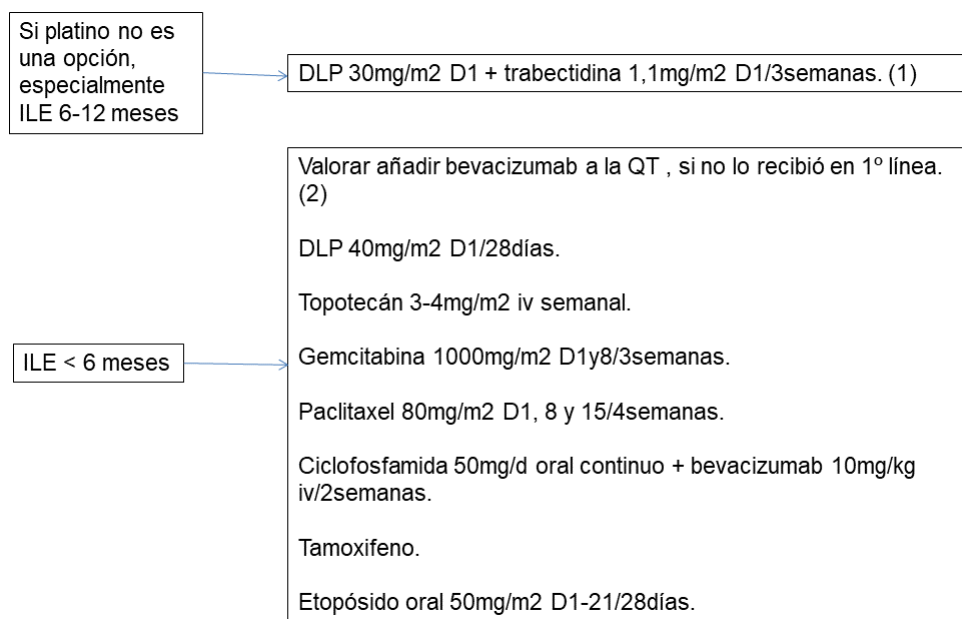

(1) MCBSv1.1: 3

(2) MCBSv1.1: 4

### III. SEGUIMIENTO

Cada revisión incluye: revisión ginecológica, analítica sanguínea con CA125 y TAC (puede alternarse con ecografía abdominopélvica, sobre todo, en estadios iniciales).

Para estadios III-IV:

- 1º y 2º año: Cada 3 meses.
- Del 3º al 5º año: Cada 6 meses.
- A partir del 5º año: anual.

Elevación aislada CA125: Si TAC normal y la paciente está asintomática =>seguimiento radiológico cada 2 meses o realizar PET-TAC (si opción de cirugía de rescate).

No inicio de QT en recaída bioquímica exclusiva (no impacto en supervivencia).

## Cáncer de cérvix

### I. DIAGNÓSTICO Y ESTADIFICACIÓN

Todas las pacientes deben tener al diagnóstico:

- Historia y exploración física completa.
- Hemograma, bioquímica con aclaramiento de creatinina.
- Exploración ginecológica (tacto vaginal, rectal y exploración de áreas ganglionares).
- Rx de tórax.
- RMN pélvica.
- TAC abdominopélvico (si adenopatías y/o tumores localmente avanzados).
- PET en tumores localmente avanzados.

### II. TRATAMIENTO

#### II.a. Estadio IA1 sin ILV:

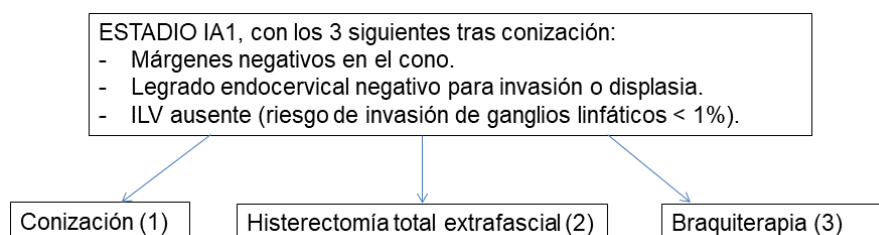

(1) Tratamiento indicado en pacientes que desean conservar la fertilidad.

(2) Cuando no deseos de fertilidad.

(3) En pacientes con gran comorbilidad y riesgo quirúrgico.

(NOTA): Estadio IA1 con los 3 criterios mencionados, no precisa QT adyuvante.

#### II.b. Estadio IA1 con ILV, IA2, IB1, IIA1:

- Tratamiento principal:

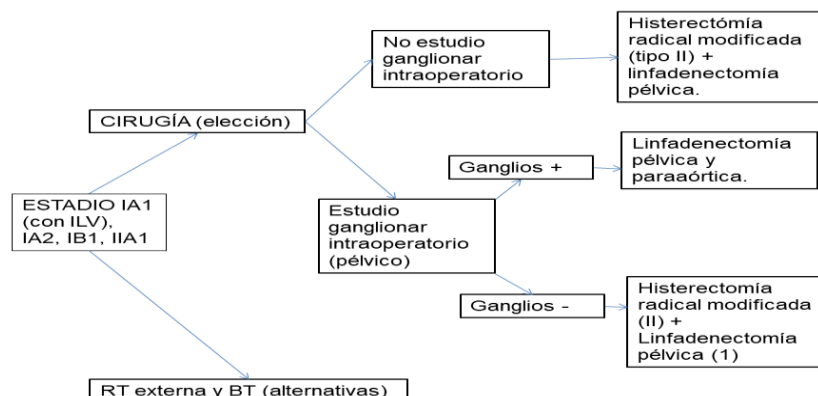

Si deseo genésico: opción de traquelectomía en tumores exocervicales < 2 cm (IB1), distancia tumor-orificio cervical interno  $\geq 15$  mm, cuello restante mínimo de 1 cm, ausencia de ILV.

- Tratamiento postquirúrgico:

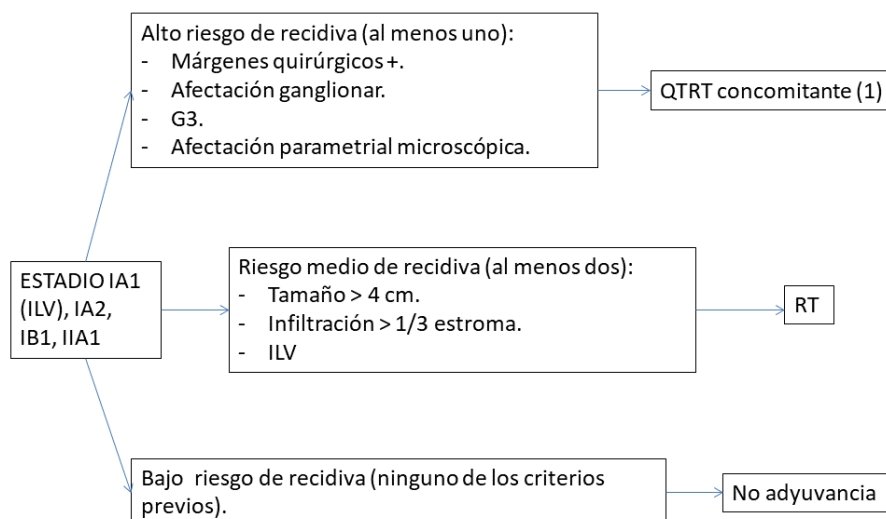

(1) Cisplatino semanal 40mg/m<sup>2</sup> hasta el fin de la RT externa.

#### II.c. Estadío IB2, IIA2, IIB, III, IVA:

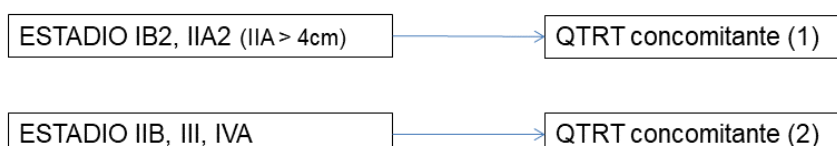

(1) Cisplatino semanal 40mg/m<sup>2</sup> hasta el fin de la RT externa. El rescate quirúrgico (histerectomía simple extrafascial) podría contemplarse una vez finalizado el tratamiento con QTRT y en el caso de sospecha de persistencia de enfermedad localizada exclusivamente en el cérvix.

(2) Cisplatino semanal 40mg/m<sup>2</sup> hasta el fin de la RT externa. Ampliación a campos paraaórticos en caso de confirmación histológica o alta sospecha de afectación por imagen.

#### II.d. Estadío IV o recidiva no resecable tras tratamiento local previo:

- PLATINO SENSIBLES (> 6 meses desde finalizado CDDP concomitante con RT):
  - o Estándar: CDDP 50 mg/m<sup>2</sup> D1 + paclitaxel 175mg/m<sup>2</sup> D1 + bevacizumab 15mg/kg D1/21d (la adición de bevacizumab mejora SLP y SG en enfermedad recurrente, persistente y metastásica). (MCBS v1.1:score 3)

- CDDP (fármaco más activo como agente único).
- CDDP 50mg/m<sup>2</sup> D1 o carboplatino AUC5 D1 + paclitaxel 175mg/m<sup>2</sup> en infusión en 3h /21d.
- CDDP 50mg/m<sup>2</sup> D1 + topotecán 0.75mg/m<sup>2</sup> D1-D3/21d.
- PLATINO RESISTENTE (<6 meses tras fin CDDP concomitante a RT):
  - Topotecán iv 4mg/m<sup>2</sup> (máximo 5mg por dosis) semanal, en ciclos de 28 días.
  - Paclitaxel semanal 80mg/m<sup>2</sup>.
  - Gemcitabina semanal 1000 mg/m<sup>2</sup>.
  - Vinorelbina semanal iv 25-30mg/m<sup>2</sup>.
  - Vinorelbina oral una vez por semana 60-80mg/m<sup>2</sup>.
  - RT paliativa.

#### II.e. Recidivas locales:

- Afectación pared pélvica (no indicación quirúrgica):
  - QTRT (si solo tratamiento quirúrgico previo).
  - QT paliativa (si no hay alternativa terapéutica).
- No afectación de pared pélvica:
  - QTRT (si no RT previa).
  - Cirugía (si RT previa), en la mayoría de los casos con exenteración pelviana. Si solo afectación pélvica y descartada afectación ganglionar mediante linfadenectomía paraaórtica.

#### III. SEGUIMIENTO

- PRIMEROS DOS AÑOS:
  - Cada 3 meses:
    - Exploración ginecológica, con citología fondo vaginal + VPH.
    - Exploración física completa, con áreas ganglionares inguinales y SPC.
  - Anual: analítica y Rx de tórax.
- TERCER - CUARTO AÑO:
  - Cada 6 meses: exploración general y ginecológica.
  - Anual: analítica y Rx de tórax.
- A PARTIR DEL QUINTO AÑO: Controles anuales.



## Cáncer de endometrio

### **I. DIAGNÓSTICO Y ESTADIFICACIÓN**

- Analítica sanguínea general.
- Rx Tórax y TAC abdominopélvico.
- RMN pélvica.
- Exploración ginecológica.

### **II. TRATAMIENTO QUIRÚRGICO**

| TRATAMIENTO QUIRÚRGICO                                                                             |                                                                                                                                                                                                                                                                                                                                                                                                                                       |                          |                                                                                                                       |                                                                                                                                        |
|----------------------------------------------------------------------------------------------------|---------------------------------------------------------------------------------------------------------------------------------------------------------------------------------------------------------------------------------------------------------------------------------------------------------------------------------------------------------------------------------------------------------------------------------------|--------------------------|-----------------------------------------------------------------------------------------------------------------------|----------------------------------------------------------------------------------------------------------------------------------------|
| ESTADIO                                                                                            | Histerectomía + salpingo-ooforectomía bilateral sin colpectomía (1)                                                                                                                                                                                                                                                                                                                                                                   | Citología peritoneal (2) | Linfadenectomía ≥ 10 GG (LDN pélvica y paraaórtica desde la arteria mesentérica inferior hasta los vasos renales) (3) | Máxima citorreducción                                                                                                                  |
| ESTADIO I                                                                                          | HT radical + salpingo-ooforectomía bilateral                                                                                                                                                                                                                                                                                                                                                                                          | Sí                       | No<br>En IB y/o G3: LDN no aumenta SG<br>(Indicado para estadiar y diseñar tto adyuvante: II C)                       | NO PROCEDE                                                                                                                             |
| ESTADIO II                                                                                         | HT simple + salpingo-ooforectomía bilateral. HT radical tipo A o modificada tipo B solo si se necesita para obtener márgenes libres (parametrios afectados)                                                                                                                                                                                                                                                                           |                          | SI                                                                                                                    |                                                                                                                                        |
| Cualquier Estadio:<br>- Células claras<br>- Seroso papilar<br>- Indiferenciado<br>- Carcinosarcoma | Igual que EI y II de CEE (no datos sobre preservación ovárica)                                                                                                                                                                                                                                                                                                                                                                        |                          |                                                                                                                       | Omentectomía:<br>1. No recomendado en:<br>- Células claras<br>- Carcinosarcomas<br>- Indiferenciados<br>2. Sí recomendado en Ca seroso |
| ESTADIO III y IV                                                                                   | CITORREDUCCIÓN MÁXIMA<br>- Linfadenectomía pélvica y para aórtica no influyen en SLP ni SG, por lo que no se debe hacer de forma rutinaria.<br>- Exenteración pélvica puede ser considerado en pacientes con tumores localmente avanzados y para recidivas locales aisladas después de la RT, si se esperan alcanzar márgenes libres.<br>- Resección de oligometástasis a distancia puede ser considerado si técnicamente es posible. |                          |                                                                                                                       |                                                                                                                                        |

(1) La cirugía mínimamente invasiva (laparoscópica o vía vaginal) es recomendada en el manejo quirúrgico del cáncer de endometrio de riesgo bajo e intermedio.

Preservación ovárica: Puede ser considerada en pacientes < 45 años, con ca de endometrio endometriode G1 EIA. En estos casos, la salpinguectomía es recomendada.

(2) La citología peritoneal tiene un valor pronóstico. Información especialmente importante en los carcinoma de endometrio no endometriode. El resultado no cambia el estadio.

(3) Disección del ganglio centinela: Es factible e incrementa la detección de metástasis ganglionares y células tumorales aisladas pero la importancia de estos hallazgos es incierta.

El muestreo ganglionar tiene una baja sensibilidad en el cáncer de endometrio.

III. TRATAMIENTO ADYUVANTE

a. Indicaciones de adyuvancia en el adenocarcinoma endometrioide

| Indicaciones de adyuvancia en el adenocarcinoma endometrioide |            |    |                                                              |
|---------------------------------------------------------------|------------|----|--------------------------------------------------------------|
| RIESGO BAJO                                                   | IA sin ILV | G1 | SEGUIMIENTO                                                  |
|                                                               |            | G2 |                                                              |
| RIESGO INTERMEDIO                                             | IB sin ILV | G1 | 1.BQT                                                        |
|                                                               |            | G2 | 2. Nada es una opción, especialmente en pacientes < 60 años. |

b. Tratamiento adyuvante

| TRATAMIENTO ADYUVANTE (ADC endometriode excepto si se especifica otra histología) |                                                                                                    |              |                                                                                                                                                                                                                                                                                                                                                                                                                    |
|-----------------------------------------------------------------------------------|----------------------------------------------------------------------------------------------------|--------------|--------------------------------------------------------------------------------------------------------------------------------------------------------------------------------------------------------------------------------------------------------------------------------------------------------------------------------------------------------------------------------------------------------------------|
| RIESGO INTERMEDIO-ALTO                                                            | IA + ILV (≥60 años)                                                                                | G1           | BRAQUITERAPIA (PORTEC 2)<br>Valorar RTE si ILV y no muestreo ganglionar/linfadenectomía.                                                                                                                                                                                                                                                                                                                           |
|                                                                                   |                                                                                                    | G2           |                                                                                                                                                                                                                                                                                                                                                                                                                    |
|                                                                                   | IA +/- ILV                                                                                         | G3           |                                                                                                                                                                                                                                                                                                                                                                                                                    |
|                                                                                   | IB + ILV                                                                                           | G1           |                                                                                                                                                                                                                                                                                                                                                                                                                    |
|                                                                                   |                                                                                                    | G2           |                                                                                                                                                                                                                                                                                                                                                                                                                    |
| RIESGO ALTO                                                                       | IB +/- ILV                                                                                         | G3           | RADIOTERAPIA EXTERNA PÉLVICA (GOG 249).<br>Braquiterapia (boost) si borde vaginal afecto.<br>Valorar QT adyuvante en pacientes con E II Ca seroso papilar alto grado (PORTEC 3); G3; ILV.                                                                                                                                                                                                                          |
|                                                                                   | II                                                                                                 | G1-3 +/- ILV |                                                                                                                                                                                                                                                                                                                                                                                                                    |
|                                                                                   | III sin enfermedad residual                                                                        | IIIA         | QT seguida de RT secuencial.<br>* En pacientes con afectación cervical se puede valorar BQT (Boost).<br>* En EIIIC2 valorar RTE con campo extendido.                                                                                                                                                                                                                                                               |
|                                                                                   |                                                                                                    | IIIB         |                                                                                                                                                                                                                                                                                                                                                                                                                    |
|                                                                                   |                                                                                                    | IIIC1        |                                                                                                                                                                                                                                                                                                                                                                                                                    |
|                                                                                   |                                                                                                    | IIIC2        |                                                                                                                                                                                                                                                                                                                                                                                                                    |
|                                                                                   | Cualquier Estadio:<br>- Células claras<br>- Seroso papilar<br>- Indiferenciado<br>- Carcinosarcoma |              | > Serosos y células claras tras citorreducción máxima:<br>E ≥ IB: RTE + QT secuencial (1), especialmente en N+.<br>> Carcinosarcoma e indiferenciados: QT ± RTE secuencial                                                                                                                                                                                                                                         |
| AVANZADO                                                                          | III con enfermedad residual                                                                        |              | > Se recomienda cirugía sólo si se espera conseguir citorreducción óptima. En casos seleccionados, se recomienda cirugía paliativa para aliviar síntomas.<br>> La exenteración puede ser considerada en pacientes seleccionadas con tumores localmente avanzados y para recidivas locales centrales aisladas tras RT, si se esperan conseguir márgenes libres.                                                     |
|                                                                                   | IV A                                                                                               |              |                                                                                                                                                                                                                                                                                                                                                                                                                    |
| METASTÁSICO                                                                       | IV B                                                                                               |              | > Completa resección de oligometástasis a distancia o recidivas ganglionares pélvicas o retroperitoneales puede ser considerados si técnicamente es posible.<br>> Si citorreducción adecuada: RTE ± QT secuencial.<br>Si RT adyuvante previa: QT.<br>> Si citorreducción incompleta o irresecables: QT paliativa.<br>Si la paciente está asintomática, el tumor es de bajo grado con RH +: Valorar hormonoterapia. |

(1)QT secuencial: Se inicia QT seguida de RT en las pacientes con más riesgo de recaída tras la cirugía y al revés en los de menor riesgo (endometrioides).

**c. Tratamiento quimioterápico adyuvante**

– CARCINOMA ENDOMETRIOIDE:

- *ESTADIO IB y II con factores de riesgo (G3, ILV):*  
Valorar QT adyuvante Carboplatino AUC5-6 + paclitaxel 175mg/21d x 4 ciclos.
- *ESTADIO III y IV:*
  - Elección: Carboplatino AUC 5-6 + paclitaxel 175mg/m<sup>2</sup>/21d x 6 ciclos.
  - En alergias o intolerancias al taxol: Adriamicina 60mg/m<sup>2</sup> D1/21d x 7 ciclos + CDDP 50mg/m<sup>2</sup> D1/21d x 8 ciclos.

– CARCINOMA SEROSO Y DE CÉLULAS CLARAS:

Los esquemas de QT empleados para el cáncer de ovario epitelial pueden ser utilizados y son recomendados en EIII/IV.

**IV. TRATAMIENTO EN PACIENTES METASTÁSICOS**

**a. Tratamiento quimioterápico**

– CARCINOMA ENDOMETRIOIDE

Muy sensibles a antraciclinas, platinos y taxanos.

PRIMERA LÍNEA:

Carboplatino AUC 5-6 + paclitaxel 175mg/m<sup>2</sup>/21d x 6 ciclos.

En alergias o intolerancias al taxol: Adriamicina 60mg/m<sup>2</sup> D1/21d x 7 ciclos + CDDP 50mg/m<sup>2</sup> D1/21d x 8 ciclos.

SEGUNDA Y POSTERIORES LÍNEAS:

No demostrado el beneficio.

Valorar en mujeres con ECOG 0-2: Epirrubicina, doxorubicina liposomal pegilada, topotecán semanal, paclitaxel semanal.

– CARCINOMA SEROSO Y DE CÉLULAS CLARAS

Los esquemas de QT empleados para el cáncer de ovario epitelial pueden ser utilizados y son recomendados en EIII/IV.

**b. Tratamiento hormonal**

Valorar añadir análogos LH-RH en premenopáusicas.

- Acetato de medroxi-progesterona 200mg/d.
- Acetato de megestrol 160mg/d.
- Tamoxifeno.
- Fluvestrant.
- IA.

Indicaciones:

- Tto de 1ª línea en CEE RH+ G1-2 con lenta progresión de la enfermedad (valorar biopsia en la enfermedad recurrente (diferencias en la expresión RH entre tumor primario/metástasis).
- No candidatas a cirugía.
- No evidencia en adyuvancia.

**c. Tratamiento radioterápico**

- Tumores primarios irresecables o en pacientes inoperables.
- Recidiva vaginal aislada.
- Recidiva pélvica: Cirugía o RT para recidivas centrales, QTRT en recidivas regionales.
- Recidivas en adenopatías pélvicas: valorar QTRT.
- Tratamiento sistémico o cirugía puede considerarse preRT en enfermedad Bulky.
- Valorar reirradiación en casos seleccionados.
- RT paliativa.

**V. SEGUIMIENTO**

PET muy sensible en las recidivas de carcinoma endometrio endometroide (valorar en sospecha).

- **PRIMEROS 2 AÑOS:**
  - Cada 3-4 meses: exploración física y ginecológica.
  - Cada 6 meses (en función de la clínica): TAC abdominopélvico, Rx tórax.
- **DEL 3º AL 5º AÑO:**
  - Cada 6 meses: exploración física y ginecológica y, valorar TAC abdominopélvico + Rx tórax.

## Cáncer de vulva

### I. DIAGNÓSTICO Y ESTUDIO DE EXTENSIÓN

- Exploración clínica ganglionar y ginecológica completa.
- Biopsia de la lesión.
- Analítica sanguínea con marcadores.
- Rx de tórax.
- TAC abdominopélvico-inguinal +/- RMN pélvica.

Factores pronósticos y de supervivencia:

Principal: Afectación ganglionar (número y tamaño de ganglios positivos).

Otros:

- Estado de márgenes de resección.
- Afectación de espacio linfovascular.
- Nivel de invasión en profundidad.
- Tamaño de la lesión.
- Multicentricidad.
- Asociación a VIN II-III.

| Factores pronósticos                                                                                | Supervivencia global a 5 años |
|-----------------------------------------------------------------------------------------------------|-------------------------------|
| Operables sin afectación ganglionar inguinal                                                        | 90%                           |
| Operables con ganglios inguinales afectos                                                           | 50-60%                        |
| Lesiones $\leq 2$ cm sin afectación ganglionar                                                      | 98%                           |
| Tumores con 3 ó más ganglios unilaterales o 2 ó más ganglios bilaterales positivos a nivel inguinal | 29%                           |
| Tumores con ganglios pélvicos afectos                                                               | 20-30%                        |

**II. TRATAMIENTO**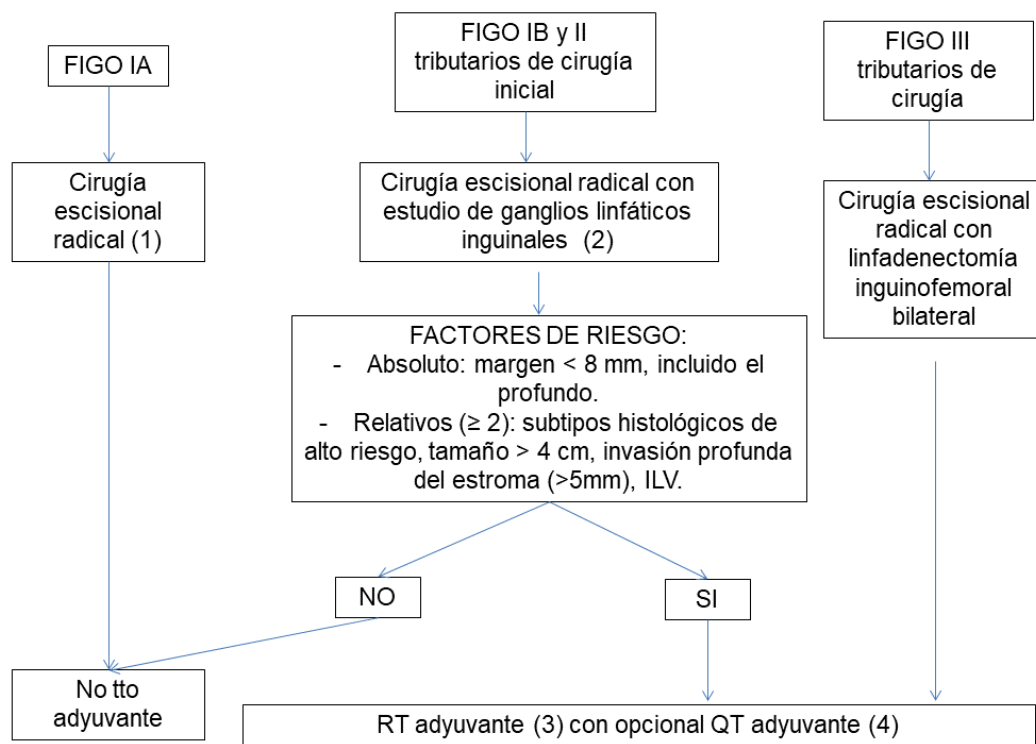

(1) En estadio I, la exéresis radical local tiene unas tasas de recurrencia similar a la vulvectomy radical (7.2% vs 6.3%).

La resección radical local debe tener:

- Margen macroscópico libre  $\geq 10$  mm (sin tensar la piel alrededor del tumor) (8mm en pieza fijada).
- Llegar en profundidad hasta el plano músculo aponeurótico.

(2) El estudio ganglionar forma parte del estudio de extensión de la enfermedad.

- Está indicado el estudio de los ganglios inguinofemorales siempre que la infiltración del estroma sea  $> 1$  mm (IB).
- No es necesaria la bilateralidad si la lesión es lateral (alejada de la línea media  $> 1$  cm).
- Técnica del ganglio centinela actualmente validada con una tasa de falsos negativos 2-6%.

(3) Radioterapia radical (vulvar y en cadenas linfáticas inguino-femorales y pélvicas).

(4) En casos individuales puede resultar adecuado añadir concomitantemente CDDP 40 mg/m<sup>2</sup> semanal x 6 semanas.



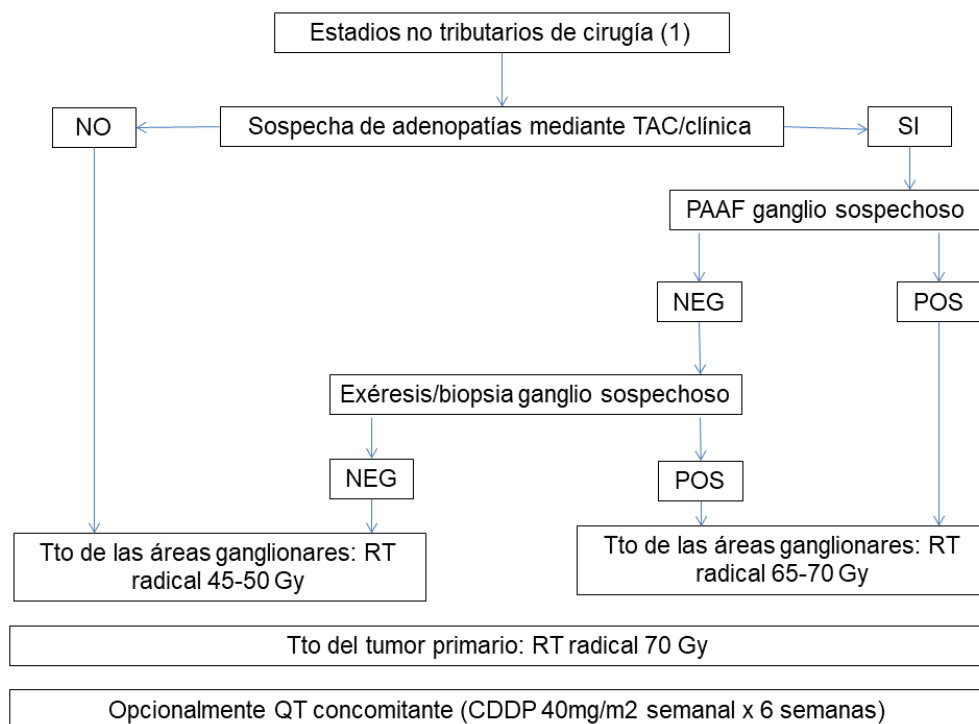

(1) Estadios no tributarios de cirugía:

- Lesiones que afectan estructuras perineales adyacentes-T3- (uretra, ano), y que el tratamiento quirúrgico condicionaría la colocación de estomas.
- Lesiones con infiltración profunda de estructuras adyacentes y/o de órganos vecinos (T4).
- Confirmación de enfermedad diseminada (metastásica): afectación de ganglios pélvicos u órganos a distancia (M1).
- Edad, patología asociada o rechazo al tratamiento quirúrgico por parte de la paciente.

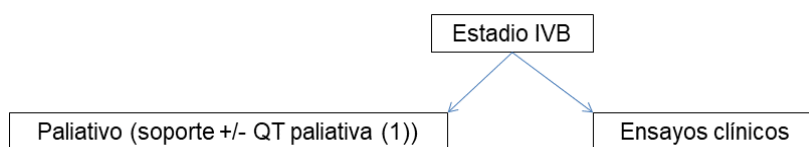

(1) Respuestas a QT de corta duración.

CDDP-paclitaxel.

CDDP-5FU.

### III. TRATAMIENTO DE LA RECAÍDA

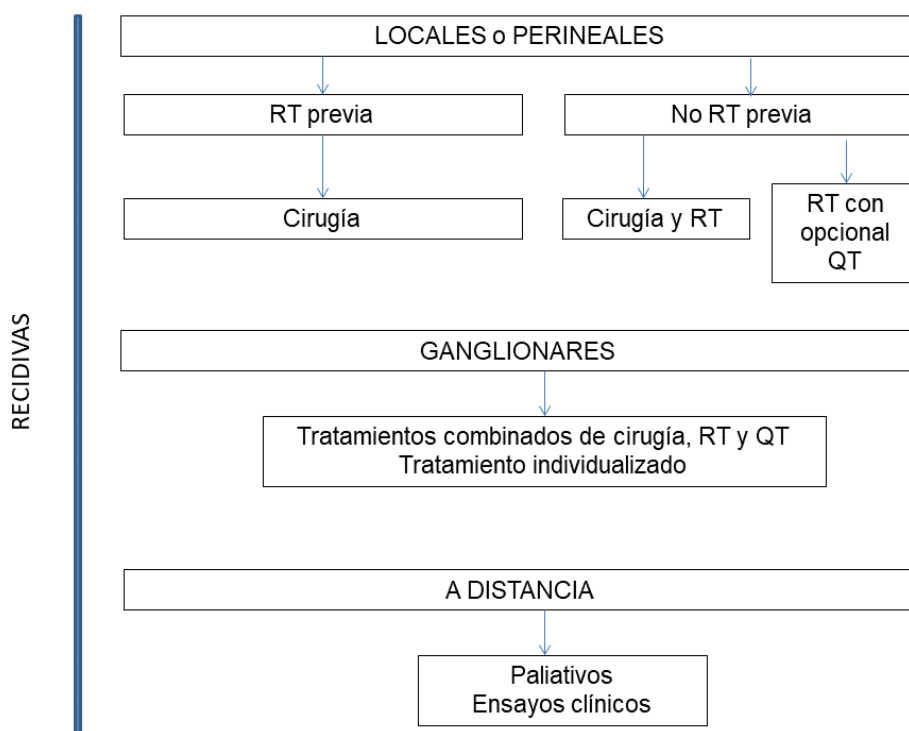

### IV. SEGUIMIENTO

El seguimiento consistirá en:

- Exploración física con examen de áreas ganglionares y exploración ginecológica.
- Pruebas complementarias (TAC, RMN, PET,..) se solicitarán sólo en caso de indicación clínica.

#### Estadios iniciales:

Dos primeros años: Semestral.

Posteriormente: Anual.

#### Estadios avanzados:

Dos primeros años: Trimestral.

Del 3º al 5º año: Semestral.

Posteriormente: Anual.

## Neoplasia trofoblástica gestacional

### I. DIAGNÓSTICO Y ESTADIFICACIÓN

El diagnóstico se constituye en base a los niveles elevados de HCG y no necesariamente por evidencia de histología o radiología.

- Exploración física y ginecológica.
- HCG seriado semanalmente.
- Analítica sanguínea general.
- Rx tórax o TAC tórax si sospecha de metástasis.
- RMN o TAC cerebral.
- TAC abdominopélvico.
- RMN pélvica, si hay indicación.
- PET, cuando el resto de pruebas no detecten enfermedad con HCG elevada.
- Estudio tiroideo, cuando esté indicado en T4.
- Si hemorragia uterina: estudio de la cavidad. Cuidado con las biopsias por gran peligro de hemorragia.

ESTADIAJE CLÍNICO DE LA FIGO 2000:

**Estadio I:** Tumor trofoblástico gestacional estrictamente limitado en el cuerpo uterino.

**Estadio II:** Tumor trofoblástico gestacional que se extiende a los anejos o a la vagina, pero limitado a las estructuras genitales.

**Estadio III:** Tumor trofoblástico gestacional que se extiende a los pulmones, con o sin afectación del tracto genital.

**Estadio IV:** Todas las metástasis de otros lugares.

| Tabla 2. Puntuación pronóstica FIGO 2000 |                       |                                   |                                     |                   |
|------------------------------------------|-----------------------|-----------------------------------|-------------------------------------|-------------------|
| Puntuación                               | 0                     | 1                                 | 2                                   | 4                 |
| Edad                                     | < 40                  | > 40                              |                                     |                   |
| Antecedente Embarazo                     | Mola<br>Hidatidiforme | Aborto                            | Término                             |                   |
| Intervalo meses desde el embarazo        | < 4                   | 4 - 6                             | 7 - 12                              | > 12              |
| HCG pre mUI/ml                           | < 10 <sup>3</sup>     | 10 <sup>3</sup> - 10 <sup>4</sup> | > 10 <sup>4</sup> - 10 <sup>5</sup> | > 10 <sup>5</sup> |
| Tamaño T. más grande                     |                       | 3 - 4 cms                         | > 5 cms                             |                   |
| Lugar de metástasis                      |                       | bazo riñón                        | tracto gastroint.                   | cerebro<br>hígado |
| Número de metástasis                     |                       | 1 - 4                             | 5 - 8                               | > 8               |
| Fallo QT previa                          |                       |                                   | Droga única                         | Dos o más         |

≤ 6 puntos: bajo riesgo.

≥ 7 puntos: alto riesgo.

**II. TRATAMIENTO**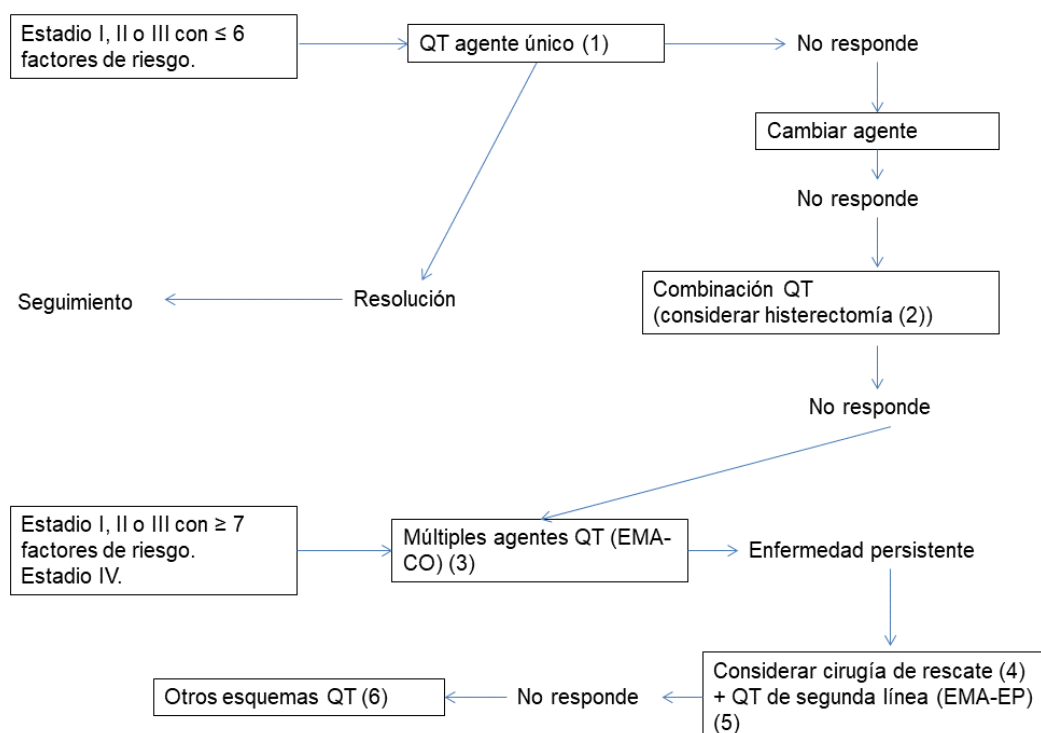

- (1) AGENTE ÚNICO: En pacientes con bajo riesgo que tienen la enfermedad hace menos de 4 meses y con valores de HCG < 40 000 mUI/ml, con puntuación pronóstica ≤ 6 y estadios I, II y III FIGO.

**FÁRMACOS USADOS EN MONOTERAPIA**

- Metotrexato 0.4mg/kg durante 5 días im, cada 2 semanas.
  - Metotrexato-leucovorín, protocolo de rescate, cada 14 días
    - Día 1: MTX 1mg/kg im.
    - Día 2: Leucovorín 0.1 mg/kg im.
    - Día 3: MTX 1mg/kg im.
    - Día 4: Leucovorín 0.1mg/kg im.
    - Día 5: MTX 1mg/kg im.
    - Día 6: Leucovorín 0.1mg/kg im.
    - Día 7: MTX 1mg/kg im.
    - Día 8: Leucovorín 0.1mg/kg im.
- Metotrexato 50mg/m<sup>2</sup> im semanal. (PREFERENTE)
- Actinomicina D 12mcg/kg iv diario durante 5 días, cada 2 semanas.
- Actinomicina D 1.25mg/m<sup>2</sup> iv cada 2 semanas.

- (2) La histerectomía precoz puede acortar la duración y cantidad de QT requerida. Después de la histerectomía (y sin histerectomía) se debe administrar QT hasta 2-3 ciclos después de la negativización de la HCG (sobre todo cuando el descenso de HCG ha sido lento o existía enfermedad extensa).

También considerar la histerectomía en enfermedad no metastásica y refractaria a la QT, que permanece confinada al útero.

(3) Esquema de quimioterapia EMA-CO:

| Esquema de quimioterapia EMA-CO |                                                                                                                                                                                                                                                      |
|---------------------------------|------------------------------------------------------------------------------------------------------------------------------------------------------------------------------------------------------------------------------------------------------|
| Día 1                           | Actinomicina D 500 mcg bolo iv                                                                                                                                                                                                                       |
|                                 | Etopósido 100mg/m <sup>2</sup> en 30-50 minutos                                                                                                                                                                                                      |
|                                 | Metotrexato 100mg/m <sup>2</sup> infusión iv en una hora                                                                                                                                                                                             |
|                                 | Metotrexato 200mg/m <sup>2</sup> infusión iv en bomba 12 horas                                                                                                                                                                                       |
| Día 2                           | Actinomicina D 500 mcg iv bolo iv                                                                                                                                                                                                                    |
|                                 | Etopósido 100mg/m <sup>2</sup> en 30-50 minutos                                                                                                                                                                                                      |
|                                 | Ácido folínico 15 mg iv en bolo cada 6 horas con total de 8 dosis, comenzando después de 24 horas del bolo de MTX. Algunos administran el ácido folínico cada 12 horas, cuatro dosis orales de 15 mg comenzando 24 horas después de comenzar el MTX. |
| Día 7                           | Vincristina 1mg/m <sup>2</sup> iv                                                                                                                                                                                                                    |
|                                 | Ciclofosfamida 600mg/m <sup>2</sup> iv                                                                                                                                                                                                               |
| Día 15                          | Comienza un nuevo ciclo                                                                                                                                                                                                                              |

(4) Cirugía cuando hay resistencia a la QT y persistencia de las metástasis.

Las metástasis de pulmón, hígado, SNC y otros lugares que no regresen con la QT pueden ser extirpadas.

(5) Esquema de quimioterapia EMA-EP: Cuando hay resistencia a EMA-CO.

Esquema EMA.

Cisplatino 20mg/m<sup>2</sup> D1-5 / 14-21 días.

Etopósido 100mg/m<sup>2</sup> iv D1-5 /14-21 días.

(6) Se puede usar:

- Esquemas de taxol con CDDP alternando con taxol-etopósido o taxol-5FU.
- ICE.
- BEP.
- Vinblastina.
- Etopósido.
- CDDP.

NOTA: El **PSTT** (tumores trofoblásticos de localización placentar) debe ser tratado fuera del contexto general de la ETG que incluye la mola hidatidiforme y el coriocarcinoma. La evolución del tumor no suele reflejarse en la HCG y mientras que hPL se manifiesta inmunohistológicamente es raro que se detecte en el suero. En el tratamiento de esta entidad la histerectomía tiene un papel preponderante cuando el tumor está localizado en el útero; en caso de enfermedad metastásica se aplicará quimioterapia tipo EMA-CO o EMA-EP.

## Carcinoma urotelial de vejiga

### I. DIAGNÓSTICO Y ESTADIFICACIÓN

-Anamnesis y exploración física

-Analítica con hemograma y bioquímica (función renal, iones, perfil hepático, LDH, proteínas totales y albúmina)

-Cálculo del aclaramiento de creatinina (Ecuación de Cockcroft-Gault):

Hombres:  $140 - [\text{Edad (años)} \times \text{peso (kg)}] / [72 \times \text{creat plasmática (mg\%)}]$

Mujeres:  $140 - [\text{Edad (años)} \times \text{peso (kg)} \times 0,85] / [72 \times \text{creat plasmática (mg\%)}]$

-Citología urinaria

-Cistoscopia: describir localización, número y tamaño de las lesiones

-Examen bimanual bajo anestesia y RTU: incluir representación de la capa muscular y especificar grado tumoral (músculo-invasivos-no músculo-invasivos/alto grado-bajo grado).

-Diagnóstico anatomopatológico según la clasificación de la WHO. Se debe tomar biopsia de la uretra prostática cuando el tumor se localiza en el trigono o en el cuello, o cuando no se evidencia tumor en la vejiga pero hay citología +.

-TC tórax-abdomen-pelvis con contraste.

-Uro-TC en fase excretora del tracto urinario alto (descartar tumor sincrónico)

-Gammagrafía ósea si clínicamente indicado (dolor óseo/elevación FA) o enfermedad musculoinfiltrante > T3.

-Estadificación según AJCC 7th edición

### II. TRATAMIENTO POR ESTADIOS

II.1. Tumores superficiales (no músculo-invasivos): Tratamiento y seguimiento por Urología.

II.2. Enfermedad músculo-invasiva:

SE DEBE DISCUTIR CADA CASO EN COMITÉ MULTIDISCIPLINAR

II.2.a. Estadio II-III

- QT neoadyuvante seguida de cistectomía radical con LDA extendida (T2-T4aN0M0): Tratamiento de elección. Se deben cumplir los siguientes ítems:

-ECOG 0-1

-ClCr > 50 ml/min

-Edad, comorbilidades y otras circunstancias no desaconsejan el uso de QT

**Cisplatino 75mg/m<sup>2</sup> D1 – Gemcitabina 1000mg/m<sup>2</sup> D1 y 8: 1 ciclo c/21 días x 3 ciclos**

\*En pacientes con función renal borderline o mínimamente afectada, se puede considerar utilizar esquema con cisplatino fraccionado (35mg/m<sup>2</sup> D1 y 8 junto con gemcitabina).

- Cistectomía radical con LDA extendida seguida de QT adyuvante: Alternativa en pacientes de riesgo post-cirugía que no han recibido QT
  - T3-4, N+
  - ECOG 0-1

-ClCr > 50 ml/min

-Perfil nutricional adecuado

**Cisplatino 75mg/m<sup>2</sup> D1 – Gemcitabina 1000mg/m<sup>2</sup> D1 y 8: 1 ciclo c/21d x 4 ciclos.**

\*En pacientes con función renal borderline o mínimamente afectada, se puede considerar utilizar esquema con cisplatino fraccionado (35mg/m<sup>2</sup> D1 y 8 junto con gemcitabina)

- Preservación vesical: Pacientes seleccionados unfit para cirugía o que rechacen la misma.

-Tumores pequeños (<5 cm) sin CIS

-RTU completa

-T2-T3a

-Ausencia de hidronefrosis

-NO

Realizar **RTU máxima** y a las 4-6 semanas **RT** concomitante (55 Gy, 20 fracciones) **con cisplatino 100 mg/m<sup>2</sup> c/21 días x 2 ciclos.**

En pacientes candidatos a QT pero no a cisplatino: **mitomicina C + 5FU concomitante a RT** (55 Gy, 20 fracciones).

Si el paciente presenta alguna contraindicación para el tratamiento con cisplatino, **RT sola.**

Si durante el seguimiento se detecta enfermedad persistente o recurrencia: **cistectomía de rescate.**

Seguimiento con cistoscopia cada 3 meses los 2 primeros años y posteriormente cada 6 meses.

- RT paliativa (dosis total 35 Gy): Pacientes no candidatos a cirugía ni preservación vesical y que requieran control de síntomas

## II.2.b. Enfermedad localmente avanzada irresecable (T4bN1)

De elección: **Cisplatino 75mg/m<sup>2</sup> D1 – Gemcitabina 1000mg/m<sup>2</sup> D1 y 8: 1 ciclo c/21 d x 3 ciclos.** (ECOG 0-1, ClCr>50ml/min)

**Carboplatino AUC 5 D1 – Gemcitabina 1000mg/m<sup>2</sup> D1 y 8: 1 ciclo c/21 d x 3 ciclos:** Alternativa en pacientes con ECOG 2, ClCr < 50 ml/min, hipoacusia/neuropatía periférica ≥ grado 2, IC GIII NYHA

- Si respuesta:
  - Valorar cirugía de rescate (casos seleccionados)
  - RT +/- QT y valorar cirugía
  - Completar 3 ciclos más de QT
- No respuesta: Valorar RT paliativa o 2º línea.

## II.2.c. Enfermedad M1:

El tratamiento es similar para tumores vesicales o de vía urinaria superior (uréter y pelvis renal)

- 1º LÍNEA:
  - Pacientes “fit”:
    - Cisplatino 75mg/m<sup>2</sup> D1 – Gemcitabina 1000mg/m<sup>2</sup> D1 y 8: 1 ciclo c/21d x 4-6 ciclos**
  - Pacientes “unfit” o no candidatos a cisplatino:

-De elección: **Carboplatino AUC 5 D1 – Gemcitabina 1000 mg/m<sup>2</sup> D1 y 8: 1 ciclo c/21 días x 4-6 ciclos**

-Alternativa si contraindicación al tratamiento con derivados del platino: **Paclitaxel 150 mg/m<sup>2</sup> D1-gemcitabina 2500mg/m<sup>2</sup> D1: 1 ciclo c/14 días.**

- 2º LÍNEA:

- Inmunoterapia en pacientes ECOG 0-1 y expresión de PD-L1, exclusivamente. Atezolizumab 1200 mg c/3 semanas hasta progresión (a la espera de la aprobación definitiva de pembrolizumab).

- Alternativas:

○ Vinflunina:

320mg/m<sup>2</sup> c/21d si ECOG 0 y no RT pélvica

280 mg/m<sup>2</sup> c/21d si ECOG 1 y/o RT pélvica

Profilaxis de estreñimiento con medidas generales y laxantes

○ Paclitaxel 175mg/m<sup>2</sup> c/21 días o 60-80 mg/m<sup>2</sup> semanal

○ Docetaxel 75mg c/21 días

### III. SEGUIMIENTO

- Anamnesis, exploración física, analítica con hemograma, función renal y hepática y electrolitos:

- cada 3 meses el 1º año.
- cada 6 meses el 2º y 3º año.
- anualmente hasta el 5º año o clínicamente indicado

- TC TAP:

- cada 6 meses los 2 primeros años.
- anualmente hasta el 5º año o clínicamente indicado.



## Cáncer de riñón

### I. DIAGNÓSTICO Y ESTADIFICACIÓN

-Anamnesis y exploración física completa.

-**Analítica completa** con hemograma, bioquímica (función renal, iones incluido calcio, albúmina, LDH y perfil hepático).

-**TC abdomen-pelvis con contraste**. Si alergia a contraste iv? RM abdomen y pelvis.

-**TC de tórax** de extensión.

-Si síntomas:

- Gammagrafía ósea
- TC/RM craneal

-Determinación de **hormonas tiroideas** en pacientes que vayan a recibir TKI.

-Estadificación según TNM AJCC 2017.

-Diagnóstico anatomo-patológico según clasificación de la WHO:

>85% CÁNCER DE CÉLULAS RENALES:

- 75%: Cáncer de células claras
- 25% No células claras: Papilar, sarcomatoide, cromóforo, de los ductos colectores, traslocación xp11, medular,...

### II. TRATAMIENTO POR ESTADIOS

#### **II.1. Enfermedad local-locoregional (estadios I-II-III):**

##### CIRUGÍA:

##### A) Nefrectomía parcial:

- T1 (<7 cm): mejor preservación de la función renal con pronóstico similar.
- Tumores bilaterales
- 1 único riñón funcionante.

##### B) Nefrectomía radical:

- T2-T4
- Si trombo tumoral: extirparlo.

C) Linfadenectomía extendida y adrenalectomía no recomendadas de rutina.

##### TRATAMIENTOS LOCALES ABLATIVOS:

A) Radiofrecuencia

B) Crioterapia

Alternativa en determinados pacientes:

- Ancianos

- Alto riesgo quirúrgico con tumores pequeños.
- Síndromes de RCC hereditarios.
- Riñón único funcionante.

VIGILANCIA ACTIVA INICIAL: Se puede valorar en ancianos o si alto riesgo quirúrgico con masas pequeñas.

## II.2. Enfermedad avanzada (estadios IV: T4 y cualquier N / M1):

### CLASIFICACIÓN PRONÓSTICA:

| CRITERIOS MSKCC                     | CRITERIOS IMDC                      |
|-------------------------------------|-------------------------------------|
| IK<80                               | IK<80                               |
| Tiempo desde el diagnóstico < 1 año | Tiempo desde el diagnóstico < 1 año |
| Anemia (Hb <LIN)                    | Anemia (Hb <LIN)                    |
| Hipercalcemia (Ca corregido > LSN)  | Hipercalcemia (Ca corregido>LSN)    |
| LDH > 1,5 x LSN                     | Trombocitosis                       |
|                                     | Neutrofilia                         |

- 0: Bajo riesgo  
1-2: Riesgo intermedio  
3 ó más: Alto riesgo

-Valorar **nefrectomía/cirugía citorreductora** en pacientes seleccionados de bajo riesgo y con baja carga tumoral metastásica tras valoración en comité multidisciplinar (tumor primario reseable, buen PS, adecuada función orgánica, sin comorbilidades significativas, ausencia de afectación del SNC).

-Si enfermedad oligometastásica y factores de buen pronóstico **metastasectomía** si es posible tras valoración en comité multidisciplinar

- 1ª LÍNEA:

#### A) BUEN PRONÓSTICO:

- **Sunitinib 50 mg cada 24 horas vo en esquema 4:2** (4 semanas de tratamiento y 2 de descanso; 1 ciclo cada 6 semanas). **ESMO MCBS v 1.1 4**. Valorar esquema 2:1 en función de tolerancia.

- **Pazopanib 800mg/24h vo continuo. ESMO MCBS v 1.1 4**

Elección según perfil de efectos adversos (astenia, trastornos GI, síndrome mano-pie, mucositis, toxicidad hepática).

#### B) PRONÓSTICO INTERMEDIO Y MALO:

- De elección: Igual que en pacientes de buen pronóstico a la espera de finalización de proceso de financiación del siguiente esquema:

**Ipilimumab 1 mg/kg + Nivolumab 3 mg/kg cada 3 semanas durante 4 ciclos (Inducción) seguido de nivolumab 3 mg/kg cada 2 semanas (Mantenimiento).**

- 2º LÍNEA
  - **Nivolumab 3mg/kg iv 1 ciclo cada 2 semanas.** De elección si contraindicación a TKI: HTA mal controlada, intolerancia (GI, EPP...). Si buena tolerancia valorar paso a esquema mensual. **ESMO MCBS v1.1: 5**
  - **Cabozantinib 60mg/24h vo continuo.** De elección si contraindicación a inmunoterapia: Enfermedad autoinmune, trasplante de órganos... **ESMO MCBS v 1.1 3**
- LINEAS SUCESIVAS

En pacientes con ECOG 0-1 seleccionados tras progresión a nivolumab y tras discusión en sesión clínica:

**Cabozantinib 60mg/24h vo continuo.**

### III. SEGUIMIENTO:

- **Pacientes en tratamiento activo:** Anamnesis, analítica y exploración física en cada ciclo. Determinación regular de hormonas tiroideas si tratamiento con ITK o IT. TC tórax-abdomen cada 3 meses.
- **Pacientes de riesgo de recurrencia alto o intermedio** los primeros 2-3 años: TC tórax-abdomen cada 3-6 meses.
- **Pacientes de bajo riesgo de recurrencia** y todos a partir de los 3 años de seguimiento: TC tórax-abdomen cada 6-12 meses.

## Cáncer de próstata

El presente protocolo contiene los siguientes apartados:

**I. Fases de la enfermedad y definiciones**

**II. Estadificación**

Diagnóstico inicial

Estudio de los pacientes ya tratados

**III. Manejo de la enfermedad localizada**

III.1. Actitud expectante y seguimiento

III.2. Vigilancia activa y seguimiento

III.3. Prostatectomía radical y seguimiento

- Hormonoterapia adyuvante

- Radioterapia adyuvante

III.4. Braquiterapia

III.5 Radioterapia externa y seguimiento

- Hormonoterapia adyuvante

III.6. Hormonoterapia como maniobra única

**IV. Recaída bioquímica y localizada**

IV.1 Rescate tras radioterapia radical

IV.2 Rescate tras prostatectomía radical

IV.3 Tratamiento hormonal exclusivo en pacientes no candidatos a rescate local

**V. Enfermedad metastática hormonosensible**

**VI. Cáncer de Próstata resistente a la castración no-metastático**

**VII. Cáncer de Próstata resistente a la castración metastático**

VII.1 Primera línea

VII.2. Segunda línea

VII.3. Tercera línea

VII.4. Elección de abiraterona o enzalutamida; y su secuenciación

VII.5. Docetaxel vs cabazitaxel y retratamiento con docetaxel

VII.6. Uso de agentes protectores del hueso

VII.7. Monitorización de la enfermedad durante la fase CPRCm

**VIII. Prevención salud ósea**

### PREÁMBULO

Los presentes protocolos constituyen recomendaciones basadas en evidencia nivel 1, 2 y 3, no obstante, la decisión de indicación y/o cambio de tratamiento deberían ser siempre decisiones consensuadas y evitarse las decisiones basadas en criterio individual. En el proceso de decisión deben considerarse siempre los ensayos clínicos antes de cualquier indicación, dado que cualquier resultado en salud en cáncer es mejorable. Como protocolos asistenciales basados en la evidencia los EECC no pueden ser incluidos en los mimos

La información sobre participación en ensayos clínicos, sus ventajas e inconvenientes, riesgos y beneficios, debe ser suministrada ala paciente por un profesional con suficiente experiencia en ensayos clínicos, y que forma parte del equipo investigador del ensayo.

**I. FASES DE LA ENFERMEDAD Y DEFINICIONES**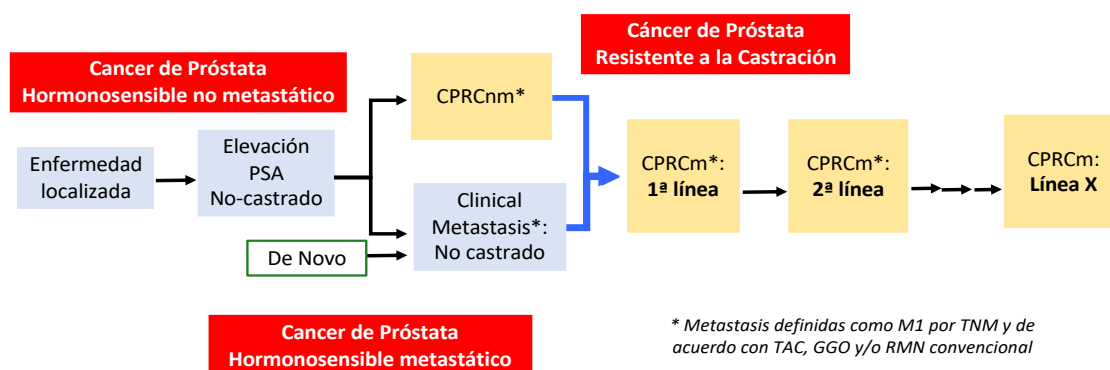**Metástasis clínicas (o relevantes para tratamiento sistémico)**

- La enfermedad metastática en el cáncer de próstata se define de acuerdo a las pruebas convencionales usadas en todos los estudios pivotaes hasta la fecha: tomografía computerizada (TC o TAC), gammagrafía ósea (GGO) y resonancia magnética nuclear (RMN) con secuencias convencionales.
- La presencia de metástasis en PET/CT (ya sea con FDG, Colina o PSMA entre otros) o la RMN con protocolo de difusión no se define a día de hoy como metástasis clínicas con evidencia suficiente para manejar los pacientes terapéuticamente como metastáticos. Su utilidad debe estar limitada a la individualización de ciertos casos y las decisiones terapéuticas derivadas de sus resultados deben ser consensuadas de manera multidisciplinar.

**Definición de la recaída bioquímica (sin evidencia de enfermedad)**

La recaída bioquímica se define de forma distinta para la prostatectomía radical en la que elimina la próstata y por lo tanto no debe haber síntesis de kalikreina-3 (o PSA), que en la radioterapia externa donde se conserva la próstata si bien irradiada.

En el primer caso *Stephenson et al* definieron inicialmente que 0.4 ng/mL era el punto de corte óptimo con valor pronóstico para la recaída tras prostatectomía radical. No obstante el consenso actual es utilizar 0,2 ng/mL para definir la recaída, y un nadir >0,1 ng/mL para definir la persistencia post-cirugía

Tras la radioterapia la recaída local se define de acuerdo con los criterios de Phoenix, como el aumento de 2 ng/mL sobre el valor nadir post-radioterapia

**Definición de enfermedad resistente a la castración**

La resistencia a la castración se define en presencia de unos niveles de testosterona sérica <50 ng/dL o 1,7 nmol/L más al menos uno de los siguientes:

- Progresión bioquímica: tres subidas consecutivas del PSA al menos 1 semana aparte cada una que resulten en un incremento relativo de al menos el 50% y un aumento absoluto >2ng/dL sobre el valor nadir tras inicio de castración;

y/o

b) Progresión radiológica:

- aparición de 2-3 nuevas lesiones en GGO;
- aparición de nuevas lesiones de partes blandas de acuerdo con RECIST en TAC

*Una progresión clínica exclusiva debe ser siempre cuestionada y no puede considerarse progresión a CPRC sin más hallazgos, ameritando profundizar en el estudio de sus causas*

## II. ESTADIFICACIÓN Y SEGUIMIENTO

### II.1. Estadificación inicial al diagnóstico

- Una **anamnesis adecuada y examen físico** completo, incluyendo tacto rectal en pacientes no prostatectomizados debe ser realizada antes de cualquier intervención y como parte de la primera visita al menos.
- **Historia de cáncer familiar** previo, con especial énfasis en historia de cáncer de próstata, así como de otros tumores asociados a síndromes familiares.
- **Analítica completa** que incluya:
  - hemograma con fórmula
  - bioquímica con creatinina, urea, Na<sup>+</sup>, K<sup>+</sup>, Glucosa, LDH, F. alcalina, GOT/GPT, GGT, BT, PT, Albúmina y Ca<sup>2+</sup> al menos.
  - PSA y testosterona.

\* El **diagnóstico histológico inicial** es idealmente por biopsia cilindro transrectal de la próstata, pero también puede ser a partir de la pieza de prostatectomía en caso de resección total o parcial, y también sería aceptable material de RTU. Una biopsia diagnóstica de una metástasis no es ideal, pero puede ser aceptable en pacientes con PSA>100 y evidencia de metástasis.

Además del porcentaje de afectación y número de cilindros afectados en cada lóbulo para la biopsia-mapeo transrectal, es importante especificar si se trata de un adenocarcinoma acinar o ductal (estando esta última asociada a un peor pronóstico). La presencia de componente cribriforme o intraductal puede tener implicaciones moleculares y pronósticas secundarias, pero a día de hoy no existe consenso para que sean reportadas sistemáticamente. Por último, si existen histología de células pequeñas, diferenciación neuroendocrina u otros subtipos esta debe ser recogida si bien sólo la histología de células pequeña comportaría una actuación diferente.

| Gleason score         | ISUP grade |
|-----------------------|------------|
| 2-6                   | 1          |
| 7 (3+4)               | 2          |
| 7 (4+3)               | 3          |
| 8 (4+4 or 3+5 or 5+3) | 4          |
| 9-10                  | 5          |

NOTA: si la biopsia diagnóstica ha sido realizada fuera del centro solicitar la recuperación de la misma.

**\* Estadificación locorregional inicial**

a) **RMN multiparamétrica (RMMP)** de próstata y pelvis puede ser útil para la estadificación inicial, pero es útil principalmente si se realiza **pre-biopsia**. El TAC y la ecografía no deben ser utilizados como estándar de estadificación clínica locorregional aunque su información puede ser útil en muchos casos es insuficiente.

*Nota: la estadificación patológica (T) sólo es posible si se realiza una prostatectomía radical y la estadificación ganglionar patológica si se realiza una linfadenectomía bilateral extendida reglada si bien no mejora los resultados oncológicos.*

Por lo tanto, la estadificación clínica local debe estar principalmente basada en biopsia, tacto rectal y en pruebas de imagen (RMN y/o TAC/Ecografía sólo si estas últimas son informativas). En función de la T, PSA y Gleason se establecerá el riesgo basal que determinará la necesidad de pruebas adicionales:

| Bajo riesgo       | Riesgo intermedio   | Alto riesgo         |                               |
|-------------------|---------------------|---------------------|-------------------------------|
| PSA < 10 ng/mL    | PSA 10-20 ng/mL     | PSA > 20 ng/mL      | cualquier PSA                 |
| y GS < 7 (ISUP 1) | o GS 7 (ISUP g 2/3) | o GS > 7 (ISUP 4/5) | cualquier GS (cualquier ISUP) |
| y cT1-2a          | o cT2b              | o cT2c              | cT3-4 o cN+                   |
| Localizado        |                     |                     | Localmente avanzado           |

En el caso de tumores de bajo riesgo, donde la afectación sea >60% de cilindros y no haya biopsia de vesícula seminal, valorar la RMMP aunque sea post-biopsia recomendándose no realizarla antes de que hayan pasado al menos 6 semanas desde la biopsia prostática

**\* Estudio de extensión / probabilidad de diseminación M1**

- Bajo riesgo no son necesarias pruebas adicionales
- Riesgo intermedio al menos considerar un TAC Toraco-abdomino pélvico, Rx Tórax (o TAC T-A-P) y gammagrafía ósea.
- Alto riesgo incluir siempre un TAC toraco-abdomino pélvico, Rx Tórax (o TAC T-A-P) y gammagrafía ósea

La utilización de técnicas basadas en emisión de positrones (PET-Colina y/o PET-PSMA) o la RMN con protocolo de difusión son superiores en especificidad en la detección de metástasis óseas, no estando claro si el PET colina es superior en sensibilidad. Las tres técnicas parecen superiores en la detección de metástasis viscerales y ganglionares a la TAC. Sin embargo, su uso debe ser restringido a situaciones especiales en las que el manejo radical de la enfermedad localizada en pruebas convencionales sea controvertido.

**II.2. Estadificación en pacientes ya tratados**

Todos los pacientes nuevos remitidos para valoración deben ser reevaluados con:

- Una **anamnesis adecuada y examen físico** completo, incluyendo tacto rectal en pacientes no prostatectomizados. Debe ser realizada antes de cualquier intervención y como parte de la primera visita al menos.
- **Historia oncológica previa.**

- **Historia de cáncer familiar** previo, con especial énfasis en historia de cáncer de próstata, así como de otros tumores asociados a síndromes familiares.
- **Analítica completa** que incluya:
  - hemograma con fórmula
  - bioquímica con creatinina, urea, Na<sup>+</sup>, K<sup>+</sup>, Glucosa, LDH, F. alcalina, GOT/GPT, GGT, BT, PT, Albúmina y Ca<sup>2+</sup> al menos
  - PSA y testosterona

\* El **diagnóstico histológico inicial** será revisado siempre cuando sea posible si el paciente proviene de otro centro, para ello se solicitará al paciente que traiga la biopsia o autorice su solicitud.

\* **Re-biopsia** en caso de dudas diagnósticas donde se plantee un rescate radical de una recidiva local o casos de evolución atípica: progresión radiológica metastática sin evidencia de elevación del PSA o sospecha transformación a tumor de célula pequeña/neuroendocrino. En estas últimas situaciones puede tener valor determinar la expresión nuclear del RA y el Ki-67.

\* **Estudio de extensión** será acorde con la fase en la que se encuentre la enfermedad y el tratamiento recibido, las pruebas a realizar en cada caso están especificadas en la subsección de seguimiento de cada fase/tratamiento

### III. MANEJO DE LA ENFERMEDAD LOCALIZADA

Existen varias opciones de manejo del paciente que se diagnostica con enfermedad localizada o localmente avanzada:

1. Actitud expectante
2. Vigilancia activa
3. Prostatectomía radical
4. Radioterapia externa
5. Braquiterapia

Algunas de estas modalidades de tratamiento pueden estar combinadas con hormonoterapia (principalmente castración química mediante análogos o antagonistas de LHRH/GnHRH) de forma neoadyuvante y/o adyuvante.

En la recomendación terapéutica debemos considerar categoría de riesgo, comorbilidades y pronóstico vital, así como las preferencias del paciente. En términos generales la siguiente tabla resumen las opciones de manejo.

| Modalidad                             | Bajo riesgo | Riesgo intermedio | Alto riesgo    |                     |
|---------------------------------------|-------------|-------------------|----------------|---------------------|
|                                       |             |                   | Localizado     | Localmente avanzado |
| <b>Actitud expectante<sup>1</sup></b> | ✓           | ✓                 | ✓/No           | No                  |
| <b>Vigilancia activa</b>              | ✓           | ✓/No <sup>2</sup> | No             | No                  |
| <b>Prostatectomía</b>                 | ✓           | ✓                 | ✓ <sup>3</sup> | ✓ <sup>3</sup>      |
| <b>Radioterapia externa</b>           | ✓           | ✓ <sup>4</sup>    | ✓ <sup>5</sup> | ✓ <sup>5</sup>      |
| <b>Braquiterapia</b>                  | ✓           | ✓/No <sup>6</sup> | No única       | No                  |



1. *Pacientes no candidatos a tratamiento radical inmediato ni demorado por comorbilidad, edad, beneficio/riesgo*
2. *Casos seleccionados con baja carga de acuerdo con paciente y comité*
3. *Casos seleccionados de acuerdo con comité con adecuada valoración por comité*
4. *Valorar hormonoterapia corta duración (6. meses) según factores de riesgo*
5. *En combinación con hormonoterapia de larga duración neoadyuvante/adyuvante y posible asociación con braquiterapia*
6. *En casos de bajo volumen, gleason 3+4, con PSA <15 ng/mL, previa discusión comité y paciente*

### III.1 Actitud Expectante

Para indicar un tratamiento local radical en aras de un beneficio en supervivencia/morbilidad secundaria a la enfermedad debemos considerar como requisito obligatorio una esperanza de vida >10 años. En este aspecto las comorbilidades son más importantes que la edad del paciente, además muchos pacientes, especialmente con enfermedad de bajo riesgo no se beneficiarán del tratamiento radical de la enfermedad local.

La actitud expectante es una opción adecuada para aquellos pacientes que por edad/comorbilidades no son candidatos de entrada a ningún tratamiento local. **Estos pacientes sólo son seguidos clínicamente tratándose únicamente cuando desarrollen síntomas secundarios a la progresión local y/o sistémica que afecten a su QoL.**

### III.2 Vigilancia activa

Similar al caso anterior, salvo que en este caso los pacientes son candidatos a tratamiento curativo si bien demoramos este tratamiento en pacientes que pudiesen no obtener beneficio de un tratamiento inmediato. Idealmente los pacientes deben ser informados adecuadamente de riesgo y beneficios y aceptar las implicaciones del seguimiento activo. Idealmente en pacientes con **ISUP 1 (gleason 6 o menor), máximo 2-3 cilindros positivos con <50% afectación, cT1 o cT2a, PSA <10 ng/mL**. Adicionalmente algunos autores sugieren una densidad de PSA <0.15 ng/mL/cc.

La vigilancia activa también podría ser considerada en pacientes ISUP 2 (Gleason 3+4, si <10% de componente 4) que cumplan además todos los criterios anteriores.

Excluir casos con carcinoma ductal, componente intraductal, sarcomatoide, célula pequeña o invasión linfo-vascular.

Existen diversas modalidades de seguimiento activo, un ejemplo adecuado conlleva:

- Tacto rectal, al menos, 1 vez al año
- PSA, al menos, semestral
- RMMP basal y, al menos, cada 18-24 meses
- Re-biopsia entre los 6-12 meses de biopsia inicial (especialmente en hombres <55 años), y después cada 2 años (puede ser dirigida por resultados de RMMP). Repetir también si progresión en categoría T por RMMP o por PSA >10ng/mL.

#### III.2.1. Indicaciones de cambio a tratamiento activo/radical:

- Cambio en categoría ISUP a consecuencia de la rebiopsia.

- Aumento del número de cores positivos a >3.
- Aumento de la afectación en los cores afectos >50%.
- Aumento del estadio "T".
- Aumento del PSA con PSADT < 3 años.

### III.3 Prostatectomía radical

El objetivo de la prostatectomía radical es la erradicación del cáncer preservando las funciones de continencia y de erección siempre que sea posible. El procedimiento conlleva la resección completa de la próstata con su cápsula y las vesículas seminales seguido de anastomosis ureterovesical. La cirugía con preservación del plexo/nervio pudiendo realizarse de forma segura en la mayoría de los pacientes salvo en aquellos con afectación/riesgo de extensión extracapsular.

#### III.3.1. Las indicaciones de la prostatectomía radical son las siguientes:

- Cáncer de Próstata de bajo riesgo.
- Cáncer de próstata del riesgo intermedio acompañado de linfadenectomía pélvica extendida en pacientes con un riesgo de extensión nodal >5% según nomograma de Briganti
- Cáncer de próstata localizado de alto riesgo si una expectativa de vida >10 años acompañado de linfadenectomía pélvica extendida y como parte de un tratamiento multimodal.
- Cáncer de próstata localmente avanzado altamente seleccionados y sólo si expectativa de vida >10 años, y cT3b-T4 N0 o T3a o inferior N1.

##### III.3.1.1 linfadenectomía pélvica extendida

La definición de linfadenectomía pélvica extendida no es uniforme en la literatura, y aunque idealmente debería englobar resección nodal del territorio de la ílica común se considera adecuada que englobe al menos los territorios ileo-obstratriz.

#### III.3.2. Seguimiento de pacientes tratados con prostatectomía radical

- Un primer nivel sérico de PSA debe ser evaluado a partir de las 6 semanas postcirugía y este debe ser <0,1 ng/mL. Si es >0,1 ng/mL previa confirmación con un segundo valor al menos 2 semanas aparte debe ser evaluado para adyuvancia inmediata frente tratamiento diferido (ver progresión bioquímica)
- Seguimiento clínico y por PSA en pacientes que tengan un PSA <0,1 ng/mL
  - a) bajo riesgo o riesgo intermedio se seguirán clínicamente y por PSA cada 6 meses durante la menos los 7 primeros años que es cuando ocurren la mayoría de las recidivas post-cirugía. En pacientes de bajo riesgo/muy bajo riesgo la frecuencia de evaluación puede ser reducida de cada 6 meses a 12 meses pasados los 3 primeros años si se considera oportuno.
  - b) en pacientes de alto riesgo o muy alto riesgo se realizará seguimiento cada 3 meses, al menos, durante los primeros 2-3 años post-cirugía, reduciéndose posteriormente a semestral.

No hay a priori indicación de tacto rectal en el seguimiento de los pacientes prostatectomizados a menos que se sospeche una recidiva local que pueda ser palpable.

#### **III.3.2.1. Definición de recidiva bioquímica en pacientes tratados con prostatectomía:**

Un PSA post-prostatectomía radical debe ser  $<0,1$  ng/mL, si no se considera persistencia de enfermedad. La recidiva por PSA en pacientes tratados tras negativización de PSA ( $<0,1$  ng/mL).

#### **III.3.3. Indicaciones de la radioterapia adyuvante tras prostatectomía radical**

##### **III.3.3.1 Pacientes con ganglios negativos**

Los pacientes con un ISUP  $\geq 3$ , o clasificados como pT3 pN0 tras prostatectomía radical por afectación de márgenes o extensión extracapsular (T3a) o afectación de vesículas seminales (T3b) tienen un alto riesgo de recidiva que puede llegar a ser del 50%. En estos pacientes constituirían indicaciones de **radioterapia inmediata** (tras recuperación función urinaria y en los 6 meses tras cirugía) sobre el lecho quirúrgico, 60 a 64 Gy en normo-fraccionamiento con IMRT (o técnica superior) o dosis bioequivalentes con hipofraccionamiento:

- Persistencia de un PSA  $>0,1$  ng/mL más allá de las 6 semanas del fin de cirugía.
- pT3 pN0 con márgenes positivos y/o invasión de vesículas seminales

La adicción de terapia hormonal a la radioterapia adyuvante de estos pacientes es controvertida y no se recomienda actualmente de forma sistemática.

##### **III.3.3.2. Pacientes con ganglios positivos**

En pacientes con ganglios positivos tras la prostatectomía radical e independientemente del nivel de PSA la radioterapia externa sobre el lecho prostático combinada con radioterapia externa podría ofrecer superioridad sobre la deprivación androgénica exclusiva. Los pacientes que más se benefician de esta estrategia son:

- pN1 $<3$  ganglios, ISUP grado 2-5 y pT3-4
- pN1  $<3$  ganglios y R1
- pN1 3-4 ganglios afectados

En todos los casos pN+ donde se aplique la radioterapia adyuvante esta no puede ser en ausencia de deprivación androgénica adyuvante

##### **III.3.3.3 Pacientes que rechacen o se contraindique la radioterapia adyuvante inmediata**

Estos pacientes serán seguidos clínica y analíticamente hasta la recidiva bioquímica (PSA  $>0,2$  ng/mL). A partir de este momento y antes de alcanzar un valor de  $1,0$  ng/mL o idealmente antes de  $0,5$  ng/mL se planteará radioterapia de rescate (ver sección correspondiente).

#### **III.3.4. Indicaciones de la hormonoterapia adyuvante tras prostatectomía radical**

La deprivación androgénica adyuvante continua en pacientes pN+ ha mostrado superioridad en supervivencia causa-específica y supervivencia global y debe ser discutida con todos los pacientes pN1+, si bien su beneficio es mayor en pacientes con  $>2$  MTS nodales y otras múltiples características de riesgo

**No debe ofrecerse hormonoterapia adyuvante a pacientes pN0**

Preferentemente la deprivación androgénica se realizará de forma continua con:

- Bicalutamida 50 mg por 28-30 días (si existe riesgo de “flare” sintomático).
- Goserelina 10,8 mg sc, Triptorelina 11,25 mg sc, o Leuprolida 22,5 mg im trimestral (a comenzar el 1er depot a los 7-15 días de bicalutamida para evitar efecto “flare”).

La deprivación androgénica debe ser continua y solo se planteará intermitencia en caso de problemas de tolerancia o rechazo del paciente.

**III.4. Braquiterapia de baja tasa**

La braquiterapia de baja tasa consiste en la inserción intraprostática de semillas radioactivas. Como modalidad única de tratamiento está indicada en pacientes **ct1b-ct2a N0, M0, ISUP grado 1 con <50% cores afectados, un PSA <10 ng/mL, un volumen prostático <50cc y un IPSS ≤12.**

**III.4.1 Indicaciones**

Los pacientes con ISUP 2 (gleason 3+4) podrían ser candidatos a esta modalidad si en ausencia de todo lo anterior además tienen <33% de los cores están afectados, PSA <15 ng/mL y ningún otro factor de riesgo.

Por último, se considera que idealmente el flujo miccional debe ser >15 mL/min si se quiere realizar braquiterapia.

La braquiterapia de baja tasa también puede utilizarse como modalidad combinada con radioterapia externa en pacientes de riesgo intermedio y alto.

**III.4.2. Seguimiento de pacientes tratados con braquiterapia de baja tasa:**

- PSA cada 6 meses al menos durante los primeros 3 años, después anual y valorar más allá de los 7 años si seguimiento según riesgo basal
- Tacto rectal al menos anual y confirmación por biopsia más allá de los 7 años

**III.4.2.1. Definición de recidiva bioquímica en pacientes tratados con braquiterapia:**

La recidiva por PSA en pacientes tratados con braquiterapia como modalidad única se define según criterios de Phoenix, como un aumento >2ng/mL sobre el valor nadir post-tratamiento.

**III.4.3 Braquiterapia de alta tasa**

Esta modalidad de braquiterapia puede ser una alternativa a la baja tasa en las mismas indicaciones.

La braquiterapia (sólo alta tasa) puede plantearse en combinación con radioterapia externa en pacientes de alto riesgo con enfermedad localizada o localmente avanzada.

### III.5. Radioterapia externa

La radioterapia externa modulada (IMRT) sin o con guía por imagen (IGRT) o con arco volumétrico (VMAT) son las técnicas estándar consideradas a día de hoy para el tratamiento radical del cáncer de próstata. Técnicas más avanzadas serán sólo consideradas en el contexto de EECC hasta que exista suficiente evidencia que suponga el cambio de este “gold standard”

IMRT puede ser administrada con fraccionamiento estandar y escalada de dosis hasta 74-80 Gy o en hipofraccionamientos moderados (60Gy/20# a 70Gy/28#) con o sin deprivación androgénica neoadyuvante/concomitante/adyuvante.

#### III.5.1 Indicaciones y modalidades

- Bajo riesgo

Se usará IMRT o superior con normofraccionamiento (76-80Gy) o hipofraccionada (60Gy/20# a 70Gy/28#) sin deprivación androgénica.

- Riesgo intermedio

Se usará IMRT o superior con normofraccionamiento (76-78Gy) o hipofraccionada (60Gy/20# a 70Gy/28#) en combinación con deprivación androgénica por 4-6 meses.

En casos de un solo factor de riesgo intermedio o pacientes que rechacen tratamiento hormonal o presenten comorbilidades se podrá considerar no administrar la hormonoterapia y escalar la dosis de tratamiento normofraccionado hasta 76-80 Gy.

La combinación de IMRT con “boost” de braquiterapia en este marco tiene una evidencia débil.

- Alto riesgo

Se usará IMRT o superior con normofraccionamiento (76-78Gy) o hipofraccionada (60Gy/20# a 70Gy/28#) en combinación con deprivación androgénica por 24 a 36 meses

Alternativamente, aunque con un nivel de evidencia menor se puede aplicar IMRT seguido de boost con braquiterapia, preferentemente de alta tasa.

En casos que el paciente rechace absolutamente la braquiterapia o tenga una contraindicación para la misma y se considere como primera opción la radioterapia se deberá plantear escalada de dosis hasta 76-80 Gy.

No hay evidencia actual de beneficio de la radioterapia profiláctica sobre las cadenas ganglionares en pacientes cN0.

- Alto riesgo - localmente avanzado

A nivel prostático se usará IMRT o superior con normofraccionamiento (76-78Gy) o hipofraccionada (60Gy/20# a 70Gy/28#) en combinación con deprivación androgénica por 24 a 36 meses.

En pacientes con cN1 o pN1 se planteará adicionalmente irradiación bilateral pélvica (o pelvis completa) a 46-50 Gy en normofraccionamiento. Los factores pronósticos asociados a mayor beneficio de la irradiación pélvica son afectación por debajo de los ganglios de las regiones iliacas, <80 años, ECOG 0-1 y sin comorbilidad severa.

En pacientes cN0 no hay evidencia del beneficio de la radioterapia pélvica.

### III.5.2. Deprivación androgénica adyuvante con radioterapia

El esquema de tratamiento hormonal de deprivación androgénica según el riesgo sería el siguiente:

- Bajo riesgo: sin indicación
- Riesgo intermedio: mínimo 4 meses a 6 meses. Puede ser comenzada concomitante o de forma neoadyuvante. El esquema más generalmente usado es:
  - Bicalutamida 50mg x 28-30 días (puede hacerse concomitante de 3-6 meses)
  - Goserelina 10,8mg sc, Triptorelina 11,25 mg sc, o Leuprolida 22,5 mg im trimestral (a comenzar el 1er depot a los 7-15 días de bicalutamida para evitar efecto “flare”) por 6 meses.
- Alto riesgo y localmente avanzado: preferentemente se comenzará de forma neoadyuvante por 8-12 semanas antes de inicio de radioterapia y mantener hasta 24-36 meses. Algunos estudios sugieren que alcanzar un PSA<1ng/mL pre-inicio de radioterapia se asocia con un mayor beneficio.
  - Bicalutamida 50mg x 28 días (puede ser concomitante hasta inicio o fin RT)
  - Goserelina 10,8mg sc, Triptorelina 11,25 mg sc, o Leuprolida 22,5 mg im trimestral (a comenzar el 1er depot a los 7-15 días de bicalutamida para evitar efecto “flare”). Se mantendrá entre 24 y 36 meses.

### III.5.3. Seguimiento de pacientes tratados con radioterapia externa:

- Bajo riesgo:
  - PSA cada 6 meses al menos durante los primeros 3 años, después anual y valorar más allá de los 7 años si seguimiento según riesgo basal.
  - Tacto rectal al menos anual y confirmación por biopsia más allá de los 7 años.
- Riesgo intermedio:
  - PSA cada 6 meses al menos durante los primeros 5 años, después anual.
  - Tacto rectal al menos anual y confirmación por biopsia más allá de los 7 años.
- Alto riesgo o localmente avanzado:
  - PSA cada 3 meses al menos durante la duración de la deprivación androgénica o hasta 3-5 años, después semestral hasta los 7 años, y valorar a posteriori si seguimiento anual.
  - Tacto rectal al menos anual y confirmación por biopsia más allá de los 7 años.

**III.5.3.1 Definición de recidiva bioquímica en pacientes tratados con radioterapia:** La recidiva por PSA en pacientes tratados con braquiterapia como modalidad única se define según criterios de Phoenix, como un aumento >2ng/mL sobre el valor nadir post-tratamiento.

### **III.6 Hormonoterapia como maniobra única**

La hormonoterapia como maniobra de tratamiento única en el cáncer de próstata localizado y asintomático no está indicada de forma sistemática y no debe ofrecerse como alternativa al tratamiento local radical si el paciente no es candidato o rechaza el mismo, excepto si son tumores de alto riesgo al menos con:

- un PSADT < 12 meses, o
- PSA > 50 ng/mL, o
- tumores pobremente diferenciados.

En pacientes sintomáticos **si** puede plantearse como alternativa al tratamiento localizado

## **IV. RECAIDA BIOQUÍMICA Y LOCALIZADA**

Ver sección III.3.2.1 para la definición de recaída bioquímica tras prostatectomía radical (>0,2 ng/mL) y sección III.5.3.1 para definición de recaída bioquímica tras radioterapia según criterios de Phoenix.

Se considerará como recaída local aquella donde exista una prueba de imagen y/o comprobación histológica de la recidiva. En pacientes tratados con hormonoterapia o aquellos con histologías atípicas (ductal, neuroendocrino de célula pequeña o células en anillo de sello) podría haber recaídas locales y/o distancia sin elevación del PSA

### **IV.1 Recaída tras prostatectomía radical previa**

Ver sección complementaria III.3.3 de radioterapia adyuvante tras prostatectomía radical.

#### **IV.1.1. Indicación de radioterapia de rescate**

A partir de una elevación del PSA >0,2 ng/mL confirmada por un segundo valor al menos 3-4 semanas posterior. A partir de este momento y antes de alcanzar un valor de 1,0 ng/mL o idealmente antes. No se recomienda demorarla más allá de 0,5 ng/mL.

Idealmente los pacientes no deben presentar metástasis, pero a los niveles ideales (<1ng/mL) de PSA para iniciar tratamiento TAC, GGO y PET/CT colina tiene baja sensibilidad. El PET PSMA-Ga68 podría ser útil en este contexto si existiese acceso.

El esquema de tratamiento recomendado sobre el lecho prostático es 66 a 70 Gy en normofraccionamiento.

#### **IV.1.2. Combinación de la radioterapia de rescate con deprivación androgénica**

La hormonoterapia o deprivación androgénica en combinación con radioterapia ha mostrado reducir la progresión metastásica pero no la supervivencia. Por ello se recomienda a falta de mayor evidencia reservar su uso para pacientes con alto riesgo de progresión metastásica:

- PSADT < 6 meses.
- Invasión vesículas seminales cT3b o pT3b.
- Gleason 8-10 (ISUP  $\geq 4$ ).
- Tiempo a la recaída bioquímica < 3 años.

En estos casos existen dos modalidades de bloqueo:

- bloqueo corto con LHRHa:
  - Bicalutamida 50mg x 28-30 días (puede hacerse concomitante de 3-6 meses).
  - Goserelina 10,8 mg sc, Triptorelina 11,25 mg sc, o Leuprolida 22,5 mg im trimestral (a comenzar el 1er depot a los 7-15 días de bicalutamida para evitar efecto “flare”) por 6 meses.
- bloqueo prolongado con bicalutamida sólo en no candidatos a LHRHa:
  - Bicalutamida 150mg cada 24 horas por 24 meses.

#### IV.1.3. La observación como alternativa al tratamiento de rescate con radioterapia

Si bien faltan ensayos clínicos randomizados, estudios retrospectivos sugieren que ciertos pacientes podrían beneficiarse de observación estrecha vs tratamiento de rescate con radioterapia:

- PSADT >12 meses.
- Tiempo a la progresión bioquímica > 3 años.
- Gleason 6 o ISUP 1.
- <pT3a en la prostatectomía.

#### IV.2. Recaída tras radioterapia externa o braquiterapia

No existe un tratamiento estándar con nivel de evidencia suficiente para ser el llamado “gold standard” de tratamiento de rescate tras el fallo de la prostatectomía radical. Entre las opciones de tratamiento se encuentran:

- Prostatectomía radical de rescate.
- Braquiterapia intersticial.
- Crioterapia.
- HIFU.

En general la técnica con mayor grado de evidencia es la prostatectomía radical de rescate. El resto de técnicas no se pueden considerar como opciones estandarizadas y deben ser discutidas con el paciente candidato y realizadas en contexto de estudios o por equipos con amplia experiencia.

##### IV.2.1 Indicación de prostatectomía radical de rescate

Esta técnica debido a su morbilidad debe ser indicada sólo en:

- Pacientes con esperanza de vida >10 años.
- Pocas comorbilidades.
- Gleason  $\leq 7$ .



- PSA <10 ng/mL andtes del rescate.
- Estadío inicial cT1 o cT2.
- No evidencia de metástasis N1 o M1 (se sugiere descartar no sólo por TAC y GGO sino también por PET-Colina o PET-PSMA según disponibilidad).

Es necesario contar con confirmación histológica de la recidiva antes de iniciar el rescate quirúrgico

### IV.3. Tratamiento hormonal exclusivo de las recaídas (M0)

#### IV.3.1. Indicaciones

El tratamiento mediante deprivación androgénica no debe ser ofrecido de forma rutinaria a la recaídas bioquímicas o locales asintomáticas (tras tratamiento inicial o rescate local) o PSADFT > 12 meses. Como opción puede ser considerado en aquellos pacientes con mayor riesgo de desarrollo de metástasis dado que la supervivencia libre de metástasis (SLM) se ha correlacionado con la SG. Los factores pronósticos asociados a desarrollo de metástasis incluyen PSDAT cortos, T3b o superior al diagnóstico, Gleason 8-10, tiempo corto a la recidiva tras diagnóstico.

#### IV.3.2. Esquema

En este contexto usaremos bloqueo intermitente con LHRHa en pacientes respondedores (con nadir PSA <1 ng/mL), nótese que en caso de iniciar una pausa del tratamiento existen varios niveles recomendados para reiniciar el tratamiento, siendo los más comunes 4 ng/mL y 10 ng/mL. La testosterona deberá monitorizarse en paralelo al PSA para diferenciar fase hormono-sensible vs castración-resistente:

- Bicalutamida 50mg x 28-30 días en pacientes sintomáticos para prevenir el flare.
- Goserelina 10,8mg sc, Triptorelina 11,25 mg sc, o Leuprolida 22,5 mg im trimestral (a comenzar el 1er depot a los 7-15 días de bicalutamida para evitar efecto “flaire”) al menos por 6 meses inicialmente.

### V. ENFERMEDAD METASTÁTICA HORMONOSENSIBLE

Desde el punto de vista de estos protocolos se considera con enfermedad metastática (M1) aquellos casos que presentan evidencia de Metástasis en la TAC, GGO y/o RMN pudiéndose ser en ocasiones de distribución atípica necesario su confirmación por biopsia. En este contexto se ha descrito por diversos grupos varios factores de riesgo relacionados con carga tumoral ósea, presencia de MTS viscerales y Gleason entre otras.

Actualmente existen 5 intervenciones distintas que han mostrado aumento de supervivencia global y tiempo de control en esta población en ensayos fase III: Docetaxel, Abiraterona, Apalutamida, Enzalutamida y la irradiación del tumor primario no tratado. Por ello a día de hoy la deprivación androgénica como modalidad única de tratamiento no debe ser ofrecida a estos pacientes.

Los pacientes PET positivos sin evidencia de metástasis por otras causas no están contemplados en esta categoría y su manejo a día de hoy debido a la escasa evidencia debe ser individualizado o similar al de los pacientes sin metástasis tras discusión en comités multidisciplinares.

### V.1 Clasificaciones de riesgo

Diversos estudios han sugerido o clasificado paciente de alto riesgo de forma diferente. La calcificación de riesgo más extendida es la usada por el estudio CHAARTED o clasificación del SWOG basada en la carga de enfermedad ósea:

|                                         | <i>BAJO</i> | <i>ALTO</i> |
|-----------------------------------------|-------------|-------------|
| <4 MTS óseas en cualquier localización  | X           |             |
| >4 MTS óseas sin ninguna extra-axial    | X           |             |
| >4 MTS óseas con al menos 1 extra-axial |             | X           |
| Enfermedad visceral                     |             | X           |

Los estudios LATITUDE y GETUG-15 han sugerido criterios adicionales de alto riesgo: Gleason 8 a 10, Fosfatasa alcalina elevada o los criterios de Glass entre otros. En todos los estudios los ganglios por debajo de la bifurcación de las iliacas se consideran N1 y no M1.

### V.2 Tratamiento sistémico del CPHSm

Existen varias opciones terapéuticas en esta situación, actualmente el tratamiento de primera elección independientemente del grupo de riesgo es:

- Bicalutamida 50mg x 28-30 días para prevenir el flare.
- Goserelina 10,8 mg sc, Triptorelina 11,25 mg sc, o Leuprolida 22,5 mg im trimestral (a comenzar el 1er depot a los 7-15 días de bicalutamida para evitar efecto “flaire”) cada 3-6 meses según compuesto.
- Docetaxel 75 mg/m<sup>2</sup> cada 21 días por 6 ciclos, idealmente se iniciará entre las 6 y 12 semanas del inicio de la castración.
- Prednisona 5 mg cada 12 horas (desayuno y merienda) por 3-5 días tras cada ciclo en pacientes <70 años sin comorbilidades o continuo durante los 6 ciclos de docetaxel si toxicidades, >70 años y/o comorbilidades.

Se considerará la profilaxis primaria de la neutropenia gebril con el uso de G-CSF 30 millones o 48 millones de UI según peso por 5 días desde el día 3 and día 7 de cada ciclo de acuerdo con el capítulo correspondiente de los protocolos.

#### Alternativas de tratamiento:

La deprivación androgénica como modalidad única sólo debe ser considerada en pacientes con comorbilidades que desaconsejen o contraindiquen el uso de docetaxel u otro posible tratamiento que en un futuro cercano pueda estar disponible.

- Bicalutamida 50mg x 28-30 días para prevenir el flaire
- Goserelina 10,8 mg sc, Triptorelina 11,25 mg sc, o Leuprolida 22,5 mg im trimestral (a comenzar el 1er depot a los 7-15 días de bicalutamida para evitar efecto “flaire”) cada 3-6 meses según compuesto.

Alternativas de tratamiento no financiado por el SNS actualmente:

Como alternativa a docetaxel en pacientes seleccionados que no sean candidatos al mismo, se les podría ofrecer si esta resulta en un momento futuro financiado por la SNS:

- a) Abiraterona 1000 mg cada 24 horas más prednisona 5 mg cada 24 horas.
- b) Apalutamida 240 mg cada 24 horas.
- c) Enzalutamida 160 mg cada 24 horas.

**V.3 Tratamiento localizado del CPHSm**

En base a resultado del estudio STAMPEDE la gammagrafía ósea tiene un valor predictivo del beneficio de la radioterapia sobre la próstata en el CPHSm. De tal forma se debe ofrecer a todos los pacientes con <4 metástasis óseas sin ninguna contraindicación para la misma para obtener una mejoría del tiempo de control sistémico y una mejora de la supervivencia global.

Los esquemas usados en el estudio fueron 2:

- Hipofraccionamiento semanal 36 Gy en 6 fracciones
- Hipofraccionamiento moderado 55 Gy en 20 fracciones

**V.4. Seguimiento del CPHSm**

No existen estudios sobre el mejor seguimiento y evaluación de los pacientes con CPHSm, no obstante, podemos deducir a partir de los estudios fase III CHAARTED, STAMPEDE y LATITUDE el ritmo de progresión de los pacientes con CPHSm según su riesgo basal, teniendo en cuenta que hasta un 10% de los pacientes tratados con nuevas terapias más ADT pueden progresar radiológicamente o clínicamente sin elevar el PSA

Seguimiento clínico:

- En pacientes tratados con docetaxel cada ciclo por 6 ciclos, y posteriormente cada 3 meses si asintomático/estable.
- En pacientes con tratamientos orales seguimientos al menos mensuales al menos 18 meses, posteriormente si no hay toxicidades se podrán reducir a cada 8-12 semanas.

Seguimiento analítico:

- Se realizará PSA, Testosterona, LDH, F. alcalina, Hg y albúmina en cada visita de tratamiento.
- En pacientes tratados con docetaxel tras completar 6 ciclos se realizará un PSA cada 12 semanas si son de bajo riesgo y cada 6 semanas si son del alto riesgo (2 PSA por visita).

Seguimiento por imagen:

- Pacientes de alto riesgo → TAC T-A-P y GGO (el primero al final de docetaxel si reciben este tratamiento) cada 3 meses por al menos 2 años, después ajustar a 3-6 meses según PSA.
- Pacientes de bajo riesgo → TAC T-A-P y GGO (el primero al final de docetaxel si reciben este tratamiento) cada 6 meses tras 36 meses y según evolución del PSA ajustar a cada 6-12 meses.

El cambio de línea de tratamiento, a primera línea de enfermedad CPRCm no se indicará simplemente por la progresión bioquímica sin valorar conjuntamente el pronóstico basal, el intervalo desde inicio de LHRHa y desde fin docetaxel, el PSADT, síntomas y existencia o no de progresión radiológica, así como su tipo y localización.

## **VI. ENFERMEDAD RESISTENTE A LA CASTRACIÓN NO METÁSTATICA**

El Cáncer de próstata resistente a la castración no metastático (CPRCnm) o M0 viene definido por aquellos pacientes que sin evidencia de metástasis por pruebas convencionales (GGO, TAC y/o RMN) han iniciado tratamiento de privación androgénica y han desarrollado progresión bioquímica que cumple la definición de CPRC (ver sección 1 del protocolo). Tal y como describió MR Smith y cols (JCO 2005; Lancet 2012) aquellos pacientes con un PSADT <10 meses presentan un incremento logarítmico de su tasa de riesgo de progresión Metastática o muerte por cáncer de próstata. Mientras tanto los pacientes con PSADT >10 meses presentan un mínimo riesgo de progresión metastática o muerte por cáncer de próstata.

Un PET/CT positivo, ya sea con trazador de colina o de PSMA, no define terapéuticamente la enfermedad como M1 ni existe indicación de tratamiento para CPRCm. Es esperable que >50% de los pacientes con PSADT<10 meses tengan un PET-PSMA-Ga68 positivo para MTS ganglionares, óseas y/o viscerales no detectables por TAC, RMN y/o GGO.

### **VI.1 Definición y cálculo del PSADT**

El PSADT indica el tiempo que transcurre para que el PSA doble su valor es una escala semi-logarítmica. Habitualmente, se determina mediante una ecuación resultante de dividir el logaritmo de 2 (0,693) por la pendiente de la regresión lineal del logaritmo de PSA en el tiempo.

Para su cálculo preciso se precisa de un mínimo de tres PSA y sus fechas DD/MMM/YYYY exactas:

- Un primer valor que es el nadir anterior al fracaso de la última maniobra terapéutica (si esta no ha funcionado, es decir no ha bajado el PSA en ningún momento, habrá que remitirse al nadir anterior o al nivel basal al inicio de la maniobra).
- El segundo y tercer valores pueden corresponder a niveles de progresión sucesivos, e idealmente se añadirán todos los PSA posibles (y al menos 1 por año desde el nadir).

La herramienta recomendada para el cálculo del PSADT es la descrita por el MSKCC accesible desde este link:

[https://www.mskcc.org/nomograms/prostate/psa\\_doubling\\_time](https://www.mskcc.org/nomograms/prostate/psa_doubling_time)

### **VI.2. Tratamiento de CPRCnm**

Actualmente existen tres ensayos positivos para prolongación de la SLM en CPRCnm y aunque los datos son aún inmaduros en 2 se ha reportado una prolongación significativa de la SG (aunque aun debe ser confirmada en análisis más maduros). Estas opciones son Apalutamida y Darolutamida. Los datos de enzalutamida son algo menos robustos a día de hoy.

No obstante, estos tratamientos no están financiados a día de hoy por el SNS, y se consideraran si son aprobados en pacientes con:

- PSADT <10 meses.
- Esperanza de vida >2 años.
- Sin osteoporosis, miopatías o sarcopenia que aumenten su riesgo de fracturas.
- Sin demencia o alteraciones psiquiátricas de base que limiten su estado funcional.
- Sin otras comorbilidades que limiten su pronóstico vital.

La primera elección por su aparente mayor actividad será:

- Apalutamida 240 mg cada 24 horas.

Como alternativa a Apalutamida se utilizará:

- Darolutamida 300 mg cada 12 horas.

Darolutamida será la primera opción sobre apalutamida en:

- Pacientes con reducción del umbral de epilepsia (antecedente de AIT/ACV, traumatismo craneo-encefálico, hemorragia cerebral previa, intervención quirúrgica cerebral o tumor cerebral, toma de benzodiacepinas o antidepresivos tricíclicos u otros fármacos que reduzcan el umbral de episodios/crisis, etc.).
- Hipotiroidismo.
- Pacientes cognitivamente muy activos o donde la alteración de la cognición pueda afectar a su rendimiento/seguridad laboral.
- Pacientes anticoagulados o con riesgo de interacciones medicamentosas con CYP2C8 y/o CYP3A4.

Otras alternativas de tratamiento, incluyendo maniobras hormonales secundarias, terciarias o cuaternarias clásicas o SBRT sobre posibles oligometástasis identificadas por PERT no son maniobras estándar y deben ser discutidas en comité multidisciplinar.

### VI.3. Seguimiento de los pacientes con CPRCnm

El seguimiento en pacientes con CPRCnm y PSADT >12 meses se basará en revisión clínica y PSA cada 3 meses con pruebas de imagen 1 vez al año o incluso con un intervalo mayor si PSADT >18-24 meses.

En pacientes con CPRCnm y PSADT <12 meses se realizará seguimiento adaptado a riesgo y empleo de tratamiento activo de la siguiente manera:

- PSADT <12 meses a >6 meses sin tratamiento:
  - PSA cada 8 semanas
  - TAC y GGO cada 24 semanas
- PSADT <6 meses sin tratamiento:
  - PSA cada 4-6 semanas
  - TAC y GGO cada 16 semanas

- PSADT <10 meses en tratamiento activo:
  - Seguridad y tolerancia cada 4 semanas, o más frecuente si EAs durante 16 meses
  - PSA cada 4 semanas por 16-20 meses al menos, pasados 16 meses si no progresión por PSA puede reducir a cada 8 semanas hasta elevación/progresión PSA
  - TAC y GGO cada 16 semanas por 16-20 meses al menos; después podría reducirse a cada 6 meses (OJO hasta 10% progresiones metastáticas sin progresión por PSA)

## VII. ENFERMEDAD RESISTENTE A LA CASTRACIÓN METÁSTATICA

El Cáncer de próstata resistente a la castración metastático (CPRCm) o M1 viene definido por aquellos pacientes que a la vez cumplen criterios de enfermedad resistente a la castración y/o son metastáticos por pruebas convencionales (GGO, TAC y/o RMN).

A la hora de decidir el tratamiento se considerarán los siguientes factores según la línea de tratamiento:

- Tratamiento/ anterior/es y supervivencia esperada.
- Tiempo de respuesta a LHRH.
- Presencia de síntomas asociados a la enfermedad, incluido dolor y necesidades de analgesia.
- ECOG PS.
- Otros factores pronósticos: LDH, ALP, albumina, HGB.

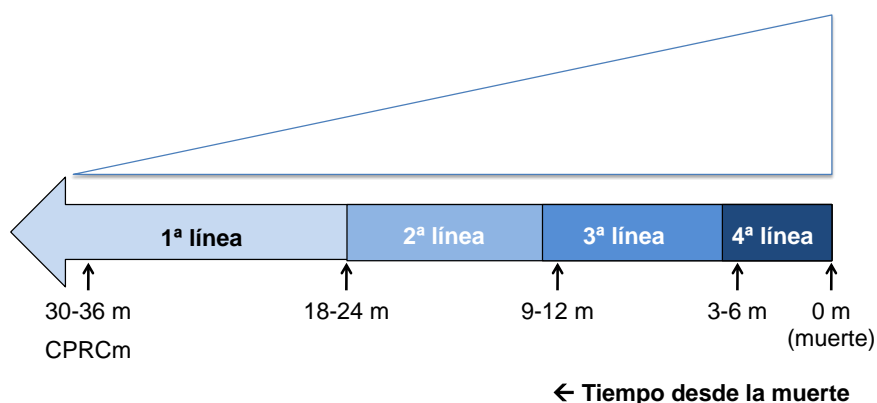

**NOTA:** supervivencias estimadas en pacientes no tratados con nuevos fármacos antes de mCRPC

### VII.1. Primera línea

Se utilizarán los siguientes algoritmos de selección en función de tratamiento previo y la presencia de 4 o más de los siguientes factores adversos:

- Tiempo a CRPC desde LHRHa <12 meses.
- LDH elevada por encima límite normalidad.
- Fosfatasa alcalina elevada por encima límite normalidad.
- Dolor por enfermedad (BPI>3) con necesidad de opiáceos.
- Enfermedad visceral.
- ECOG PS  $\geq$  2.

### VII.1.1. Retirada de antiandrógeno clásico

Si el paciente venía realizando BAC o se había añadido bicalutamida/flutamida/nilutamida a LHRHa y había experimentado respuesta bioquímica se debe realizar la retirada de antiandrógeno por, al menos, 4 semanas (6 semanas para la bicalutamida) previo a considerar cualquier nueva línea de tratamiento; salvo en caso de progresión radiológica y clínica simultánea.

### VII.1.2. Sólo ADT previo (+/-maniobras clásicas)

#### VII.1.2.1. Si presenta <4 factores de riesgo de mal pronóstico la 1era opción será:

- Abiraterona acetato 1000 mg c24h más

prednisona 5 mg c12h (desayuno y merienda).

ó si existe alguna contraindicación absoluta o relativa para abiraterona o corticoides (ver sección VII.4)

- Enzalutamida 160 mg cada 24 horas

#### VII.1.2.2. Si presenta 4 o más factores de riesgo de mal pronóstico la 1era opción será:

- Docetaxel 75 mg/m<sup>2</sup> cada 21 días hasta 10 ciclos.
- Prednisona 5 mg cada 12 horas (desayuno y merienda).

*Nota: Si estado general limitado y factores de riesgo valorar soporte con G-CSF x 5días e incremento de esteroides antes de reducción a 60 mg/m<sup>2</sup>*

Ó si existe contraindicación de Docetaxel (ver sección 7.5) considerar:

- Cabazitaxel 25 mg/m<sup>2</sup> cada 21 días hasta 10 ciclos.
- Prednisona 5 mg cada 12 horas (desayuno y merienda) continuo más
- G-CSF (30 o 48x10<sup>6</sup> de UI según peso) desde 48 h post-cabazitaxel x 7 días x ciclo

Si el paciente es frágil y añoso y no se considera candidato a 25 mg/m<sup>2</sup>, considerar:

- Cabazitaxel 20 mg/m<sup>2</sup> cada 21 días hasta 10 ciclos.

### VII.1.3. ADT más docetaxel en CPHSm

#### VII.1.3.1. Si <4 factores de riesgo, la PD Rx/Clinica a docetaxel >6 meses fin Docetaxel:

- Abiraterona acetato 1000 mg c24h más

prednisona 5 mg c12h (desayuno y merienda)

ó si existe alguna contraindicación absoluta o relativa para abiraterona o corticoides (ver sección 7.4)

- Enzalutamida 160 mg cada 24 horas

#### VII.1.3.2. Si presenta 4 o más FR o PD Rx/Clinica <6 meses fin docetaxel:

- Cabazitaxel 25 mg/m<sup>2</sup> cada 21 días hasta 10 ciclos.
- Prednisona 5 mg cada 12 horas (desayuno y merienda) continuo más

- G-CSF (30 o  $48 \times 10^6$  de UI según peso) desde 48 h post-cabazitaxel x 7 días x ciclo

Si el paciente es frágil y aioso y no se considera candidato a  $25 \text{ mg/m}^2$ , considerar:

- Cabazitaxel  $20 \text{ mg/m}^2$  cada 21 días hasta 10 ciclos.

#### **VII.1.4. ADT + abiraterona/enzalutamida/apalutamida/darolutamida en CPHSm o CPRCnm**

##### **VII.1.4.1. Si no contraindicación de quimioterapia**

- Docetaxel  $75 \text{ mg/m}^2$  cada 21 días hasta 10 ciclos.
- Prednisona 5 mg cada 12 horas (desayuno y merienda)

*Nota: Si estado general limitado y factores de riesgo valorar soporte con G-CSF x 5 días e incremento de esteroides antes de reducción a  $60 \text{ mg/m}^2$ .*

O si existe contraindicación de Docetaxel (ver sección 7.5) considerar:

- Cabazitaxel  $25 \text{ mg/m}^2$  cada 21 días hasta 10 ciclos.
- Prednisona 5 mg cada 12 horas (desayuno y merienda) continuo más
- G-CSF (30 o  $48 \times 10^6$  de UI según peso) desde 48 h post-cabazitaxel x 7 días x ciclo

Si el paciente es frágil y aioso y no se considera candidato a  $25 \text{ mg/m}^2$ , considerar:

- Cabazitaxel  $20 \text{ mg/m}^2$  cada 21 días hasta 10 ciclos.

##### **VII.1.4.2. contraindicación absoluta\* o rechazo total\* de quimioterapia:**

*\*NOTA: Evaluado por Oncólogo Médico experto en el área e informado al paciente de manera exhaustiva*

Si al menos 2 de los siguientes: Fosfatasa alcalina elevada, enfermedad ósea  $>4$  MTS, y/o dolor óseo; y no presenta enfermedad visceral o ganglionar  $>3$  cm o en progresión franca, con pronóstico vital  $>6$  meses

- Radium-223  $55 \text{ mBq/Kg}$  cada 28 días por 6 ciclos

Si no candidato a Ra-223 se podrá discutir en comité multidisciplinar la opción de secuenciar terapias de nueva generación contra los andrógenos.

Estos pacientes deben ser derivados precozmente a seguimiento conjunto por la unidad de cuidados paliativos.

#### **VII.2. Segunda línea**

Se utilizarán los siguientes algoritmos de selección en función de tratamiento previo y la presencia factores de riesgo o síntomas tal y como se especifica a continuación:

##### **VII.2.1. Si sólo docetaxel o cabazitaxel**

- Abiraterona acetato 1000 mg c24h más prednisona 5 mg c12h (desayuno y merienda)

ó si existe alguna contraindicación absoluta o relativa para abiraterona o corticoides (ver sección VII.4)

- Enzalutamida 160 mg cada 24 horas

ó si existe contraindicación absoluta para ambos abiraterona y enzalutamida



- A) Si al menos 2 de los siguientes: Fosfatasa alcalina elevada, enfermedad ósea >4 MTS, y/o dolor óseo; y no presenta enfermedad visceral o ganglionar >3 cm o en progresión franca, con pronóstico vital > 6 meses
- Radium-223 55mBq/Kg cada 28 días por 6 ciclos

- B) Si no cumple A y ha recibido cabazitaxel previo, y no contraindicación docetaxel
- Docetaxel 75 mg/m<sup>2</sup> cada 21 días hasta 10 ciclos.
  - Prednisona 5 mg cada 12 horas (desayuno y merienda)

*Nota: Si estado general limitado valorar reducción a 60 mg/m<sup>2</sup>.*

- C) Si no cumple A y ha recibido docetaxel previo, y no contraindicación cabazitaxel
- Cabazitaxel 20 mg/m<sup>2</sup> cada 21 días hasta 10 ciclos
  - Prednisona 5 mg cada 12 horas (desayuno y merienda) continuo.

*Nota: Si el paciente es joven y/o sintomático considerar en vez de 20 mg/m<sup>2</sup>:*

- Cabazitaxel 25 mg/m<sup>2</sup> cada 21 días hasta 10 ciclos
- G-CSF (30 o 48x10<sup>6</sup> de UI según peso) desde 48 h post-docetaxel x 7 días x ciclo.

#### **VII.2.2. Si sólo abiraterona más prednisona o enzalutamida**

- Docetaxel 75 mg/m<sup>2</sup> cada 21 días hasta 10 ciclos.
- Prednisona 5 mg cada 12 horas (desayuno y merienda)

*Nota: Si estado general limitado y factores de riesgo valorar soporte con G-CSF x 5días e incremento de esteroides antes de reducción a 60 mg/m<sup>2</sup>.*

O si existe contraindicación de Docetaxel (ver sección 7.5) considerar:

- Cabazitaxel 25 mg/m<sup>2</sup> cada 21 días hasta 10 ciclos.
- Prednisona 5 mg cada 12 horas (desayuno y merienda) continuo más
- G-CSF (30 o 48x10<sup>6</sup> de UI según peso) desde 48 h post-cabazitaxel x 7 días x ciclo

Si el paciente es frágil y añoso y no se considera candidato a 25 mg/m<sup>2</sup>, considerar:

- Cabazitaxel 20 mg/m<sup>2</sup> cada 21 días hasta 10 ciclos.
- 

O si existe contraindicación absoluta de ambos taxanos o rechazo absoluto de ambas\*:

- A) Si al menos 2 de los siguientes: Fosfatasa alcalina elevada, enfermedad ósea >4 MTS, y/o dolor óseo; y no presenta enfermedad visceral o ganglionar >3 cm o en progresión franca, con pronóstico vital > 6 meses.
- Radium-223 55mBq/Kg cada 28 días por 6 ciclos.
- B) Si no se cumple A se mantendrá línea anterior o tratamiento paliativo.

*\*NOTA: Evaluado por Oncólogo Médico experto en el área e informado el paciente de manera exhaustiva. NO se deben secuenciar terapias hormonales de nueva generación fuera del contexto de EECC bien fundamentados o de forma asistencial sin discusión y aprobación por comité experto y/o multidisciplinar*

### VII.2.3. Si docetaxel más abiraterona o enzalutamida

- Cabazitaxel 20 mg/m<sup>2</sup> cada 21 días hasta 10 ciclos
- Prednisona 5 mg cada 12 horas (desayuno y merienda) continuo más

Nota: Si el paciente es joven y/o sintomático considerar en vez de 20 mg/m<sup>2</sup>:

- Cabazitaxel 25 mg/m<sup>2</sup> cada 21 días hasta 10 ciclos
- G-CSF (30 o 48x10<sup>6</sup> de UI según peso) desde 48 h post-docetaxel x 7 días x ciclo.

O si existe contraindicación o se rechaza de cabazitaxel\*:

- A) Si al menos 2 de los siguientes: Fosfatasa alcalina elevada, enfermedad ósea >4 MTS, y/o dolor óseo; y no presenta enfermedad visceral o ganglionar >3 cm o en progresión franca, con pronóstico vital > 6 meses
- Radium-223 55mBq/Kg cada 28 días por 6 ciclos

- B) Si no se cumple A se mantendrá línea anterior o tratamiento paliativo.

*\*NOTA: Evaluado por Oncólogo Médico experto en el área e informado el paciente de manera exhaustiva. NO se deben secuenciar terapias hormonales de nueva generación fuera del contexto de EECC bien fundamentados o de forma asistencial sin discusión y aprobación por comité experto y/o multidisciplinar*

### VII.2.4. Si docetaxel más cabazitaxel

- Abiraterona acetato 1000 mg c24h más prednisona 5 mg c12h (desayuno y merienda)  
ó si existe alguna contraindicación absoluta o relativa para abiraterona o corticoides (ver sección VII.4)
- Enzalutamida 160 mg cada 24 horas

ó si existe contraindicación absoluta para ambos abiraterona y enzalutamida

- A) Si al menos 2 de los siguientes: Fosfatasa alcalina elevada, enfermedad ósea >4 MTS, y/o dolor óseo; y no presenta enfermedad visceral o ganglionar >3 cm o en progresión franca, con pronóstico vital > 6 meses
- Radium-223 55mBq/Kg cada 28 días por 6 ciclos
- B) Si no se cumple A tratamiento paliativo

*\*NOTA: Evaluado por Oncólogo Médico experto en el área e informado el paciente de manera exhaustiva. NO se deben secuenciar terapias hormonales de nueva generación fuera del contexto de EECC bien fundamentados o de forma asistencial sin discusión y aprobación por comité experto y/o multidisciplinar*

### VII.2.5. Si abiraterona más enzalutamida previas

- Docetaxel 75 mg/m<sup>2</sup> cada 21 días hasta 10 ciclos
- Prednisona 5 mg cada 12 horas (desayuno y merienda)

Nota: Si estado general limitado y factores de riesgo valorar soporte con G-CSF x 5días e incremento de esteroides antes de reducción a 60 mg/m<sup>2</sup>

O si existe contraindicación de Docetaxel (ver sección 7.5) considerar:

- Cabazitaxel 20 mg/m<sup>2</sup> cada 21 días hasta 10 ciclos

- Prednisona 5 mg cada 12 horas (desayuno y merienda) continuo más

Nota: Si el paciente es joven y/o sintomático considerar en vez de 20 mg/m<sup>2</sup>:

- Cabazitaxel 25 mg/m<sup>2</sup> cada 21 días hasta 10 ciclos
- G-CSF (30 o 48x10<sup>6</sup> de UI según peso) desde 48 h post-docetaxel x 7 días x ciclo.

O si existe contraindicación absoluta de ambos taxanos o rechazo absoluto de ambas\*:

- C) Si al menos 2 de los siguientes: Fosfatasa alcalina elevada, enfermedad ósea >4 MTS, y/o dolor óseo; y no presenta enfermedad visceral o ganglionar >3 cm o en progresión franca, con pronóstico vital > 6 meses
- Radium-223 55mBq/Kg cada 28 días por 6 ciclos.

- D) Si no se cumple A se mantendrá línea anterior o tratamiento paliativo.

*\*NOTA: Evaluado por Oncólogo Médico experto en el área e informado el paciente de manera exhaustiva. NO se deben secuenciar terapias hormonales de nueva generación fuera del contexto de EECC bien fundamentados o de forma asistencial sin discusión y aprobación por comité experto y/o multidisciplinar*

### VII.3. Tercera línea

Es escasa la evidencia del beneficio en SG de la tercera línea de tratamiento, aunque esta es posible de acuerdo con los datos actuales

#### VII.3.1. Si abiraterona o enzalutamida más docetaxel previo

Ver sección VII.2.3

#### VII.3.2. Si docetaxel más cabazitaxel previo

Ver sección VII.2.4

#### VI.3.3. Si abiraterona más enzalutamida

Ver sección VII.2.5

#### VII.3.4. Si docetaxel o cabazitaxel más radium 223

- Abiraterona acetato 1000 mg c24h más

prednisona 5 mg c12h (desayuno y merienda)

ó si existe alguna contraindicación absoluta o relativa para abiraterona o corticoides  
(ver sección VII.4)

- Enzalutamida 160 mg cada 24 horas

ó si existe contraindicación absoluta para ambos abiraterona y enzalutamida

- A) Si cabazitaxel previo

- Docetaxel 75 mg/m<sup>2</sup> cada 21 días hasta 10 ciclos
- Prednisona 5 mg cada 12 horas (desayuno y merienda)

*Nota: Si estado general limitado y factores de riesgo valorar soporte con G-CSF x 5 días e incremento de esteroides antes de reducción a 60 mg/m<sup>2</sup>*

B) Si docetaxel previo

- Cabazitaxel 20 mg/m<sup>2</sup> cada 21 días hasta 10 ciclos
- Prednisona 5 mg cada 12 horas (desayuno y merienda) continuo.

Nota: Si el paciente es joven y/o sintomático considerar en vez de 20 mg/m<sup>2</sup>:

- Cabazitaxel 25 mg/m<sup>2</sup> cada 21 días hasta 10 ciclos.
- G-CSF (30 o 48x10<sup>6</sup> de UI según peso) desde 48 h post-docetaxel x 7 días x ciclo.

### VII.3.5. Si abiraterona o enzalutamida más radium 223

Si la terapia anterior en Ra-223 dejar 6 semanas o más antes de inicio taxano

- Si ha hecho docetaxel previo considerar:
  - Cabazitaxel 20 mg/m<sup>2</sup> cada 21 días hasta 10 ciclos
  - Prednisona 5 mg cada 12 horas (desayuno y merienda) continuo más

Nota: Si el paciente es joven y/o sintomático considerar en vez de 20 mg/m<sup>2</sup>:

- Cabazitaxel 25 mg/m<sup>2</sup> cada 21 días hasta 10 ciclos

G-CSF (30 o 48x10<sup>6</sup> de UI según peso) desde 48 h post-docetaxel

- Si ha hecho Cabazitaxel previo considerar:
  - Docetaxel 75 mg/m<sup>2</sup> cada 21 días hasta 10 ciclos
  - Prednisona 5 mg cada 12 horas (desayuno y merienda)

*Nota: Si estado general limitado y factores de riesgo valorar soporte con G-CSF x 5 días e incremento de esteroides antes de reducción a 60 mg/m<sup>2</sup>.*

Si existe contraindicación absoluta de ambos taxanos o rechazo absoluto de ambas\*:

- tratamiento paliativo

*\*NOTA: Evaluado por Oncólogo Médico experto en el área e informado el paciente de manera exhaustiva. NO se deben secuenciar terapias hormonales de nueva generación fuera del contexto de EECC bien fundamentados o de forma asistencial sin discusión y aprobación por comité experto y/o multidisciplinar*

### VII.3.6. Pacientes que han recibido 3 o más fármacos asociados a >OS

No existe estándar de tratamiento que se pueda recomendar en esta población y una evaluación cuidadosa del mismo por comité de expertos es imprescindible para maximizar beneficio frente a paliación y no incurrir en sobretratamiento.

### VII.4. Elección de enzalutamida frente a abiraterona

Se seleccionará preferentemente enzalutamida sobre abiraterona en las siguientes circunstancias:

- Antecedentes de arritmia ventricular.
- Insuficiencia cardíaca sintomática o sospecha con LVEF <45%.
- Fibrilación auricular mal controlada o con episodios de descompensación reciente.

- HTA mal controlada con 2-3 fármacos (OJO distinguir de efecto bata blanca en visitas médicas).
- Necesidad de medicación concomitante con riesgo de hipopotasemia.
- Diabetes mellitus de mal control.
- Otra situación que represente una contraindicación para el uso de esteroides crónicos.

No se usará enzalutamida en las siguientes circunstancias:

- Antecedentes de crisis convulsivas, AIT o ACV previo.
- Cirugía craneoencefálica, tumores SNC o traumatismo craneoencefálico.
- Medicación que disminuya umbral de crisis.
- Astenia severa.
- Deterioro cognitivo previo o trastornos motores, marcha o coordinación.
- Interacciones medicamentosas con CYP2C8 y/o CYP3A4.
- Hipotiroidismo.

#### **VII.5. Elección de cabazitaxel frente a docetaxel, retratamiento con docetaxel**

Usaremos cabazitaxel frente a docetaxel como 1er taxano en CPRCm si:

- Neurotoxicidad previa moderada o severa
- Tratamiento previo con docetaxel en enfermedad hormonosensible, o resistente a la castración no metastásica.
- Pacientes con antecedentes de reacción alérgica o infusional a docetaxel que reaparece a pesar de protocolo de desensibilización.
- Neumonitis previa por taxanos (docetaxel o paclitaxel).

##### **VII.5.1 Retratamiento con docetaxel:**

No existen EECC prospectivos concluyentes sobre la eficacia y seguridad del retratamiento con docetaxel. Su uso puede ser planteado en:

- pacientes con buena tolerancia previa y sin efectos secundarios residuales
- un ILE ó de progresión tras fin de docetaxel:
  - >6m en mCRPC o
  - >24 meses en CPHSm.

En cualquier caso, retratamiento con docetaxel no es una opción estándar y debe ser una recomendación consensuada por el equipo médico.

#### **VII.6. Uso de agentes protectores del hueso**

No hay beneficio probado en pacientes CPHSm o CPRCnm o en fases iniciales, sólo en el CPRCm

Con el aumento de la supervivencia en CRPCm y la introducción de agentes hormonales y radionúclidos efectivos sobre la enfermedad metastásica se ha observado un descenso progresivo de las fracturas patológicas y eventos

esqueléticos relacionados con la enfermedad y por el contrario un aumento de los efectos osteopóroticos. Las fracturas osteoporóticas también se han asociado a mayor morbilidad y muerte.

En todos los pacientes con CPRCm y metástasis óseas debe ser consideradas las siguientes: opciones:

En pacientes ambulatorios que tienen tratamiento iv, ingresados o con hipercalcemia:

- Ácido zolendróico 4 mg iv cada 4 o 12 semanas

En pacientes ambulatorios, sin tratamiento IV.

- Denosumab 120 mg sc cada 4 o 12 semanas.

Los esquemas mensuales no deben mantenerse más de 24 meses y su momento de comienzo idealmente será cuando se estime una supervivencia  $\leq 24$  meses o exista evidencia de osteoporosis u osteopenia severa en combinación con metastasis óseas. Considerar siempre su inicio los pacientes hayan recibido terapia hormonal de nueva generación y vayan a comenzar radium-223.

Alternativamente se pueden considerar y quizás **priorizar los esquemas trimestrales** que están asociado a una disminución similar de los eventos osteoporóticos y no parecen inferiores en la prevención de eventos esqueléticos relacionados.

## VII.7. Monitorización del CPRCm

Como referencia de la actividad antitumoral de un fármaco se deben utilizar los criterios PCWG3 y RECIST 1.1. Estos criterios por primera vez reflejan el concepto de “tiempo hasta cese de beneficio clínico” que viene a medir en un entorno complejo y multifactorial como es la enfermedad avanzada cuando deja de beneficiar un tratamiento a un paciente más allá de definiciones como la progresión bioquímica, radiológica y/o clínica por eventos óseos relacionados o dolor.

En pacientes fuera del entorno ideal de EECC, la preferencia no es la medición de la respuesta en sí sino monitorizar el control de la enfermedad y esto conlleva el uso regular de PSA, pruebas radiológicas y la evaluación clínica. Las siguientes recomendaciones deben realizarse en el seguimiento de todos los pacientes en los que se opte por un tratamiento activo.

- **Pacientes en curso de abiraterona o enzalutamida (primeros 24 meses)**
  - Revisión clínica cada 4 semanas (en caso abiraterona cada 2 semanas el 1er mes)
  - PSA, testosterona, LDH, albumina, F. Alcalina y Hgb al menos cada 4 semanas
  - Enzimas hepáticas cada 4 semanas al menos con abiraterona
  - Si enzalutamida TSH al menos trimestral o más frecuente si terapia hormonal sustitutiva
  - Perfil lipídico cada 3 meses
  - TAC T-A-P cada 12 semanas, tras 1er TAC puede reducirse de 12 a 16 semanas según respuesta
  - GGO cada 12 semanas, tras 1er TAC puede reducirse de 12 a 16 semanas según respuesta

***Pasados 24 meses si paciente sigue en respuesta es posible espaciar las evaluaciones.***

- **Pacientes en curso de docetaxel o cabazitaxel (tratamiento activo)**
  - Revisión clínica cada 3 semanas (en caso abiraterona cada 2 semanas el 1er mes)
  - Hemograma y formula cada 3 semanas
  - PSA, testosterona, LDH, albumina, F. Alcalina, función renal y enzimas hepáticas cada 3 semanas
  - TAC T-A-P y GGO pre-ciclo 5 (semana 12), pre-ciclo 8 (semana 21), y 6 semanas por ciclo 10. Después cada 3-4 meses hasta progresión
  - Una vez completado docetaxel o cabazitaxel se intentarán suspender los esteroides
- **Pacientes con Ra-223**
  - Revisión clínica cada 2 semanas\*
  - Hemograma y formula cada 2 semanas\*
  - PSA, testosterona, LDH, albumina, F. Alcalina, función renal y enzimas hepáticas al menos cada 4 semanas
  - TAC T-A-P y GGO pre-ciclo 4 (semana 12), y pos-ciclo 6 (24 semanas). Después cada 3-4 meses hasta progresión

*\*Nota: en pacientes con buena reserva medular, <2 línea de QT previa, no super-scan y sin toxicidad asociada, tras completar ciclo 3 pueden reducirse evaluaciones a cada 4 semanas.*

### **VIII. PREVENCIÓN DE LA SALUD ÓSEA**

La deprivación androgénica se ha asociado de forma proporcional al tiempo de exposición a una mayor remodelación ósea y pérdida progresiva de densidad mineral ósea. Además la deprivación androgénica produce sarcopenia simultánea que contribuye al deterioro de la salud ósea.

Por otro lado, el aumento de la supervivencia en el Cáncer de Próstata avanzado y/o resistente a la castración con los nuevos tratamientos también contribuye al deterioro de la salud ósea. Excepto la quimioterapia basada en taxanos, el resto de tratamientos abiraterona, enzalutamida, apalutamida, darolutamida, Ra-223 se han asociado a un incremento de las fracturas osteoporóticas/osteopénicas a la vez que reducían las metástasis óseas patológicas.

Por último, el tratamiento prolongado con esteroides, incluso a dosis bajas contribuye de forma significativa al desarrollo de osteoporosis.

Las fracturas osteoporóticas, especialmente la pélvica, cadera o vertebrales se asocian a mayor mortalidad en el cáncer de próstata.

Hoy en día se considera imprescindible monitorizar y tomar las siguientes medidas sobre la salud ósea de estos pacientes:

El Cáncer de próstata resistente a la castración metastático (CPRCm) o M1 viene definido por aquellos pacientes que a la vez cumplen criterios de enfermedad resistente a la castración y/o son metastáticos por pruebas convencionales (GGO, TAC y/o RMN).

Siempre antes de iniciar ADT por tiempo prolongado (>12 meses), y si no se ha realizado a la primera visita que se evalúe el paciente

- DEXA (densitometría) basal y repetir según riesgo cada 2-4 años
- **Vitamina-D y Calcio 1000 UI/600 Mg cada 24 horas**
- Valorar FRAX: <https://www.sheffield.ac.uk/FRAX/tool.aspx?lang=spn>
- Si T score <-2.5 comenzar tratamiento profiláctico adicional a Vit.D/Ca2+
- o <-1 y otros factores de riesgo asociado (Obesidad, sarcopenia, fracturas previas, metastasis, ...) valorar tratamiento profiláctico

Opciones de profilaxis de fracturas adicionales a Vit.D/Ca2+

- Siempre mantener Vitamina D y Calcio diario
- Primera elección: Denosumab 60 mg cada 6 meses
- Bifosfonato oral.



## Tumores germinales de testículo

### I. DIAGNÓSTICO Y ESTUDIO DE EXTENSIÓN

- Analítica sanguínea general con marcadores tumorales (AFP, BHCG y LDH) y determinación hormonal (FSH, LH y testosterona).
- Seminograma basal. Valorar criopreservación de semen.
- Rx de tórax simple.
- TAC tórax en TGNS, y en TGS si hay afectación retroperitoneal.
- TAC abdominopélvico.
- Ecografía testicular contralateral (con determinación del volumen testicular).
- TAC o RMN cerebral en TGNS con metástasis pulmonares si L3, o L1-2 con cifras de BHCG > 1000 mUI/ml.

| L (número y tamaño de metástasis pulmonares)                      |   |               |                 |
|-------------------------------------------------------------------|---|---------------|-----------------|
| L1: menos de 3 y menores de 2 cm.                                 |   |               |                 |
| L2: más de 3 y menores de 2 cm.                                   |   |               |                 |
| L3: mayor de 2 cm.                                                |   |               |                 |
| S (marcadores tumorales)                                          |   |               |                 |
| SX: Marcadores séricos no disponibles o no determinados.          |   |               |                 |
| S0: Niveles de marcadores séricos dentro de los límites normales. |   |               |                 |
| LDH                                                               |   | BHCG (mUI/ml) | AFP (ng/ml)     |
| S1: < 1.5 x LSN                                                   | y | < 5000        | y < 1000        |
| S2: 1.5 – 10 x LSN                                                | ó | 5000 – 50 000 | o 1000 – 10 000 |
| S3: > 10 x LSN                                                    | ó | > 50 000      | o > 10 000      |

### CLASIFICACIÓN IGCCCG:

| TG          | Buen Pronóstico                                                                | Pronóstico Intermedio                                                 | Mal Pronóstico                                                             |
|-------------|--------------------------------------------------------------------------------|-----------------------------------------------------------------------|----------------------------------------------------------------------------|
| No Seminoma | Todos los criterios:<br>AFP <1.000 ng/ml<br>BHCG <5.000 UI/L<br>LDH <1,5 x LSN | AFP 1.000-10.000ng/ml<br>BHCG 5.000-50.000 UI/L<br>LDH 1,5 - 10 x LSN | Algún criterio:<br>AFP >10.000 ng/ml<br>BHCG >50.000 UI/L<br>LDH >10 x LSN |
|             | No primario mediastínico<br>No metástasis viscerales extrapulmonares           |                                                                       | Primario mediastínico.<br>Metástasis viscerales extrapulmonares            |
| Seminoma    | Metástasis limitadas a ganglios linfáticos y/o pulmón.                         | Metástasis viscerales extrapulmonares                                 |                                                                            |

**II. TRATAMIENTO DEL SEMINOMA**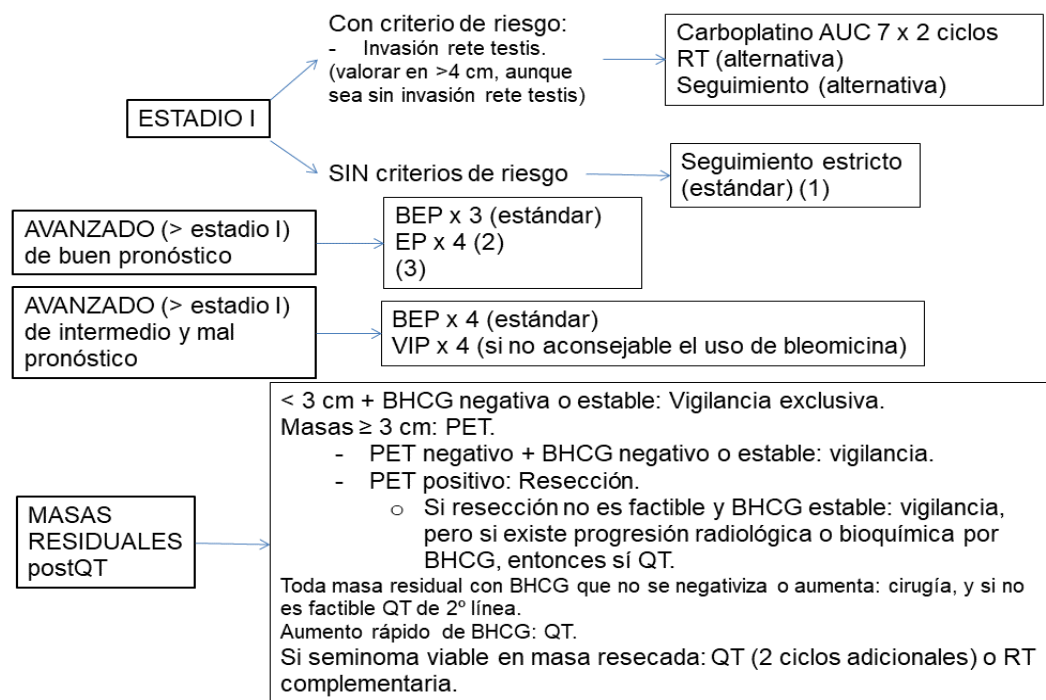

(1) Pacientes con dificultad para seguir el programa de control establecido: carboplatino adyuvante 2 ciclos, igual que en aquellos con factor de riesgo.

(2) En pacientes con contraindicación a bleomicina.

(3) Pacientes con adenopatías retroperitoneales < 5 cm de diámetro en los que la QT puede conllevar riesgos significativos, se administrará RT a dosis de 36Gy (26Gy en cadenas paraaórticas y pélvicas homolaterales, más boost de 10Gy).

**III. TRATAMIENTO DEL NO SEMINOMA**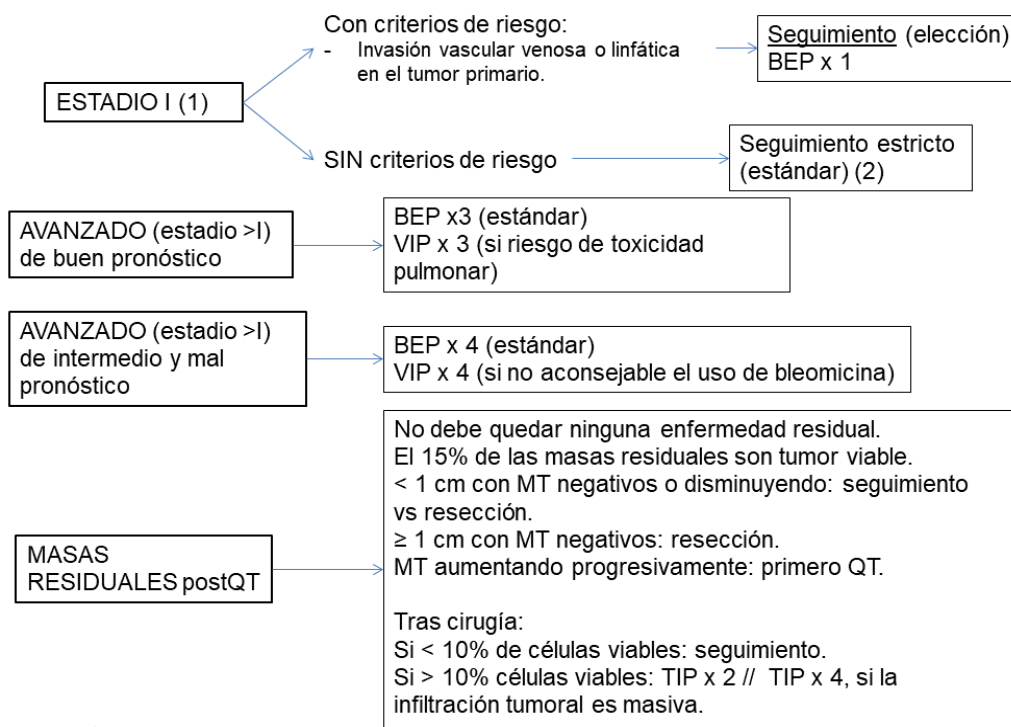

(1) Tras orquiectomía se debe verificar la negativización de los marcadores tumorales. Si no se obtiene dicha negativización, no se trata de un estadio I verdadero, sino de un estadio IM+, que debe tratarse como un TGNS avanzado.

Vida media de BHCG es 3-3.5 días.

Vida media de AFP es aprox 7 días.

(2) Si el paciente prefiere tratamiento activo o no es posible adherencia al seguimiento, QT adyuvante.

**IV. SEGUIMIENTO****Table 6** Recommended follow-up schedules

| Tumor                 | Stage  | Treatment                        | Exploration  | 1st year<br>(months) | 2nd year<br>(months) | 3rd–5th year<br>(months) |
|-----------------------|--------|----------------------------------|--------------|----------------------|----------------------|--------------------------|
| Seminoma              | I      | Surveillance                     | Markers*     | 4                    | 6                    | 6                        |
|                       |        |                                  | Chest X-ray  | 4                    | 6                    | 6                        |
|                       |        |                                  | Abdominal CT | 4                    | 6                    | 12                       |
| Seminoma              | I      | Adjuvant carboplatin             | Markers*     | 6                    | 6                    | 12                       |
|                       |        |                                  | Chest X-ray  | 6                    | 6                    | 12                       |
|                       |        |                                  | Abdominal CT | 6                    | 12                   | 12                       |
| Non-seminoma          | I      | Surveillance                     | Markers      | 2                    | 3                    | 6                        |
|                       |        |                                  | Chest X-ray  | 4                    | 6                    | 6                        |
|                       |        |                                  | Abdominal CT | 4                    | 6                    | 12                       |
| Non-seminoma          | I      | Adjuvant BEP                     | Markers      | 3                    | 3                    | 6                        |
|                       |        |                                  | Chest X-ray  | 6                    | 12                   | 12                       |
|                       |        |                                  | Abdominal CT | 6                    | 12                   | 12                       |
| Seminoma Non-seminoma | II–III | Post BEP ± residual mass surgery | Markers*     | 3                    | 3                    | 6                        |
|                       |        |                                  | Chest X-ray  | 6                    | 6                    | 12                       |
|                       |        |                                  | Abdominal CT | 6                    | 6                    | 12                       |

\* The use of serum tumor markers to guide or monitor treatment for advanced seminoma or to detect relapse in those treated for stage I seminoma is debatable

Ecografía testicular cada 3 años (si calcificaciones, cada año).

## Melanoma

### I. DIAGNÓSTICO, TRATAMIENTO INICIAL Y ESTUDIO DE EXTENSIÓN

#### I.1 BIOPSIA ESCISIONAL DE LA LESIÓN:

- Tipo de melanoma (nodular, extensión superficial, lentigo maligno, lentiginoso acral)
- Nivel de Clark
- Profundidad de penetración (Breslow)
- Ulceración
- Mitosis/mm<sup>2</sup>
- Presencia de satelitosis o metástasis en tránsito
- Linfocitos infiltrantes de tumor (TIL) (recomendado)
- Invasión linfovascular y nerviosa.
- Si se realiza BSGC, en caso de metástasis, incluir tamaño de la misma (Clasificación de Rotterdam):
  - \*Submicrometástasis: <0,1 mm de diámetro.
  - \*Micrometástasis: 0,1-2 mm de diámetro.
  - \*Macrometástasis: >2 mm de diámetro.

#### I.2. CIRUGÍA DEFINITIVA CON MÁRGENES QUIRÚRGICOS +/- BSGC:

##### MÁRGENES QUIRÚRGICOS:

- \*MQ profundo: fascia.
- \*MQ laterales según Breslow:
  - Breslow <1mm: 1 cm.
  - Breslow 1-2 mm: 1-2 cm.
  - Breslow >2mm: 2cm.

##### BIOPSIA SELECTIVA DEL GANGLIO CENTINELA:

- Realizar Linfogammagrafía y BSGC si Breslow > 1mm.
- Si Breslow > 0.75mm + algún factor de riesgo de los abajo mencionados, discutir en comité y con el paciente la realización de BSGC:
  - Ulceración
  - Clark IV
  - Regresión
  - Alto índice mitótico
  - Edad <40 años.

>Si GC +: Valorar en comité DISECCIÓN GANGLIONAR COMPLETA vs. OBSERVACIÓN ACTIVA mediante seguimiento ecográfico estrecho (el vaciamiento axilar no ha demostrado aumento de la supervivencia, solo del ILE).

DISECCIÓN GANGLIONAR COMPLETA: Si adenopatía clínicamente positiva confirmada mediante PAAF/BAG.

ESTADIFICACIÓN SEGÚN TNM 8º ED AJCC 2017 (7º edición para adyuvancia).

### I.3. ESTUDIO DE EXTENSIÓN:

- **Anamnesis y exploración física completa** (calota, craneal, adenopatías LC, SC, axilares, inguinofemorales).
- **Analítica** con hemograma, BQ y función hepática y LDH
- **Radiografía de tórax y ecografía abdominal.**
- Si dudas en la palpación, **ecografía ganglionar o de partes blandas.**
- Solicitar **mutaciones de BRAF V600** en estadios III resecados y en todos los estadios IV (resecados y no).
- **PET-TC** (a partir de estadio III → N+) ó al menos **TC cervical-tórax-abdomen-pelvis + TC/RM SNC** si síntomas. En pacientes con estadio III y mutación de BRAF se recomienda solicitar estudio SNC de rutina dada la alta incidencia de M1 a dicho nivel.

**II. TRATAMIENTO ADYUVANTE:** Estadios IIB-C (T4/ulceración) y III (N+).

*En todos los casos, valorar realizar tratamiento dentro de ensayo clínico si existe disponibilidad.*

-**Interferón alfa 2B según protocolo de altas dosis (esquema de Kirkwood):** 20 MU/m<sup>2</sup> x 5días/semana x 4 semanas iv. 3 semanas de descanso.

Mantenimiento: 10 MU/m<sup>2</sup> x 3 días/semana x 11 meses sc.

\*Contraindicaciones: patología psiquiátrica de base, PS  $\geq$  2, hepatopatía, enfermedad concomitante grave, edad  $\geq$  70 años.

-**RT adyuvante:** MQ inadecuados en lentigo maligno, melanoma desmoplásico neurotrófico y resecciones R1 de metástasis.

Valorar tras LDA con alto R de recidiva ganglionar (no efecto en OS ni PFS):

- \*Extensión tumoral extranodal
- \* $\geq$  3 ganglios afectados
- \* Tamaño mts ganglionar  $\geq$  3cm.

**\*El tratamiento adyuvante con los siguientes esquemas se comentará en sesión interna y su uso debe ser aprobado:**

Pacientes con ECOG 0-1.

Sin comorbilidad que contraindique el tratamiento.

Independiente para actividades básicas de la vida diaria (Índice de Charlson).

-**Nivolumab** 3mg/kg 1 ciclo cada 2 semanas iv durante 1 año: Estadios IIIB-IV resecaados. Checkmate 238: *Adjuvant Nivolumab versus ipilimumab in resected stage III or IV melanoma. N Engl J Med 2017;377:1824-35. DOI: 10.1056/NEJMoa1709030. Aprobado por FDA y EMA.*

-**Pembrolizumab** 200 mg cada 3 semanas iv durante 1 año; Estadios III resecaados. Keynote 054: *Adjuvant Pembrolizumab vs. Placebo in resected stage III melanoma. N Engl J Med 2018; 378:1789-1801 DOI: 10.1056/NEJMoa1802357. Aprobado por FDA.*

-**Dabrafenib 150 mg/12 horas vo continuo + Trametinib 2mg/24h vo continuo** durante 1 año: Estadios III resecaados con mutación de BRAF. COMBI-AD *Adjuvant Dabrafenib plus Trametinib in Stage III BRAF-Mutated Melanoma. N Engl J Med 2017;377:1813-23. DOI: 10.1056/NEJMoa1708539. Aprobado por FDA y CE.*

### III. METÁSTASIS LOCORREGIONALES:

- Metástasis “en tránsito” → Si es posible, CIRUGÍA

- Metástasis múltiples inoperables locorregionales cutáneas/subcutáneas en una extremidad →

- Valorar técnica locoregional disponible
- Derivación a H.V. Macarena (Sevilla) para perfusión/infusión de miembro afecto.
- RT

-Estadio III / IVa irresecable: ver apartado de enfermedad M1.

### IV. ENFERMEDAD M1:

DETERMINAR SIEMPRE MUTACIONES BRAF V600. Valorar otras determinaciones moleculares (NRAS y ckit en melanoma de mucosas o acral).

> En enfermedad oligometastásica, valorar cirugía. Posteriormente, valorar disponibilidad de tratamiento adyuvante como indicado en apartado 2.

### **1º LÍNEA BRAF MUTADO:**

-Inhibidor de BRAF + inhibidor de MEK:

- Dabrafenib 150 mg/12h vo + Trametinib 2mg/24h vo continuos. **ESMO-MCBS v1.1: 4**

-Vemurafenib 960mg/12h vo + cobimetinib 60mg/24h vo continuo durante 3 semanas con 1 semana de descanso. **ESMO-MCBS v1.1: 4**

-Inhibidor de BRAF en monoterapia si contraindicación para la combinación:

-Dabrafenib 150mg/12 h vo continuo

- Vemurafenib 960mg/12h vo continuo.

-Si buen PS y no se necesita una respuesta rápida o hay contraindicación para el uso de iBRAF:

- Nivolumab 240mg iv 1 ciclo c/2 semanas. . **ESMO-MCBS v1.1: 4**

Si en los 2 primeros meses no hay incidencias, se podría utilizar dosis de Nivolumab 480mg cada 4 semanas.

## 2º LÍNEA Y SUCEсивAS BRAF MUTADO:

-Si IT en 1ºL: iBRAF+iMEK (ver arriba)

-Si iBRAF +/- iMEK en 1ºL: Anti-PD1: Nivolumab (**ESMO-MCBS v1.1: 3**)

En el caso de pacientes jóvenes con necesidad de mayor respuesta (M1 SNC asintomáticas,...) determinar PDL1. Si expresión menor del 5% valorar combinación Nivolumab-Ipilimumab: Nivolumab 1 mg/kg + Ipilimumab 3 mg/ kg iv cada 3 semanas por 4 dosis seguido de Nivolumab 3 mg/kg cada 2 semanas.

-Si fallo de anti-PD1: Ipilimumab.

-Si se agotan opciones previas: Quimioterapia (ver abajo)

## 1º LÍNEA BRAF-wt:

-Nivolumab (ver arriba)

-Si mutación en NRAS: Trametinib (ver arriba).

-Si mutación en ckit: Imatinib 400mg/24 h vo continuo

-Quimioterapia si contraindicación a IT (ver abajo)

## 2º LÍNEA Y SUCEсивAS BRAF-wt:

-Ipilimumab 3mg/kg 1 ciclo cada 3 semanas (máx 4 ciclos). No mantenimiento.

-Quimioterapia (si contraindicación a IT o tras progresión al mismo)

## ESQUEMAS DE QUIMIOTERAPIA:

-Dacarbazina: 1000 mg/m<sup>2</sup> 1 ciclo cada 3 semanas iv

-Temozolamida 200-250mg/m<sup>2</sup> D1-5 vo cada 28 días.

-Fotemustina 100mg/m<sup>2</sup> iv D1-8-15→ 5 semanas de descanso→1 ciclo c/3sem si no ha habido progresión.

-Carboplatino / cisplatino: esquemas c/21 días o semanales

-Paclitaxel semanal: 80 mg/m<sup>2</sup> iv

-Carboplatino AUC 5-6 + Paclitaxel 225-200mg/m<sup>2</sup> iv 1 ciclo cada 3 semanas.

## V. SEGUIMIENTO

- -Primeros 3 años: cada 6 meses
  - Anamnesis y exploración física
  - Analítica con hemograma, BQ, perfil hepático y LDH
  - Rx de tórax
  - Ecografía abdominal
  - Ecografía de regiones ganglionares afectadas previamente
- -Cada año:
  - TC tórax-abdomen
  - Dermoscopia



- -4º y 5º año: cada 6 meses.
- -A partir del 5º año: anual.
  - Dermoscopia a los 6 meses en caso de iBRAF
  - ECG al inicio y cada 3 meses si iBRAF
  - Revisión inicial por oftalmología en caso de iBRAF.

## VI. MELANOMA DE MUCOSAS:

-Por orden de frecuencia: cabeza y cuello, mucosa ano-rectal, mucosa vulvo-vaginal

-Menor frecuencia de mutación BRAF. Mutación más frecuente: c-kit (hasta 30%).

-Excluir que se trate de una metástasis de un melanoma cutáneo/ocular o un melanoma regresado. Exploración anal y ginecológica si no se encuentra primario.

ESTADIFICACIÓN: **Estadificación simplificada de Ballantyne:**

Estadio I: enfermedad localizada

Estadio II: afectación ganglionar regional

Estadio III: enfermedad metastásica a distancia.

Estadificación TNM melanoma de mucosas de cabeza y cuello. AJCC 7th Ed (2010)

| <b>T</b> | <b>Tumor primario</b>                                                                                                                                                                     |
|----------|-------------------------------------------------------------------------------------------------------------------------------------------------------------------------------------------|
| T3       | Enfermedad mucosa                                                                                                                                                                         |
| T4a      | Enfermedad moderadamente avanzada: afectación de tejidos blandos profundos, cartílago, hueso o piel subyacente.                                                                           |
| T4b      | Enfermedad muy avanzada: Afectación de cerebro, duramadre, pares craneales bajos (IX, X, XI, XII), espacio masticador, arteria carótida, espacio prevertebral o estructuras mediastínicas |
| <b>N</b> | <b>Ganglios regionales</b>                                                                                                                                                                |
| Nx       | No evaluables                                                                                                                                                                             |
| N0       | Sin metástasis en ganglios linfáticos regionales                                                                                                                                          |
| N1       | Metástasis en ganglios linfáticos regionales                                                                                                                                              |
| <b>M</b> | <b>Metástasis a distancia</b>                                                                                                                                                             |
| M0       | Sin metástasis a distancia                                                                                                                                                                |
| M1       | Metástasis a distancia                                                                                                                                                                    |

| <b>ESTADIO</b> | <b>T</b>     | <b>N</b>    | <b>M</b> |
|----------------|--------------|-------------|----------|
| III            | T3           | N0          | M0       |
| IVA            | T4a<br>T3-4a | N0<br>N1    | M0<br>M0 |
| IVB            | T4b          | Cualquier N | M0       |
| IVC            | Cualquier T  | Cualquier N | M1       |

-ENFERMEDAD LOCALIZADA:

Cirugía con márgenes libres. No datos suficientes acerca de BSGC. Linfadenectomía sólo si adenopatías clínicamente positivas.

- RT adyuvante si márgenes afectados o cirugía R1 (mejora el control local)
- Si no es posible cirugía, RT paliativa
- No datos suficientes para apoyar tratamiento adyuvante con Interferón

-ENFERMEDAD AVANZADA:

*Valorar realizar tratamiento dentro de ensayo clínico siempre que sea posible.*

\*Mutación/amplificación de c-kit: IMATINIB 400mg/24h vo continuo: Medicamento no aprobado en ficha técnica para esta indicación. Se debe comentar el caso en sesión clínica y su uso debe ser aprobado por el jefe de servicio.

\*No mutación de c-kit: tratamiento como el melanoma cutáneo según presencia o no de mutación BRAF.

## Cáncer de piel no melanoma

### I. CARCINOMA BASOCELULAR

#### I.1. CLASIFICACIÓN HISTOLÓGICA:

##### -CA. BASOCELULARES SUPERFICIALES:

- Superficial
- Nodular (clásico, micronodular compacto, pseudoquístico)
- Fibroepitelioma de Pinkus
- Ca infundíbulo-quístico.

##### -CA BASOCELULARES INFILTRATIVOS:

- Ca basocelular coronado
- Ca metatípico.

##### -FORMAS MIXTAS.

#### I.2. CLASIFICACIÓN CLÍNICA:

| SUPERFICIAL                                                                                                     | PERLADO (95%)                                                                                                                             |
|-----------------------------------------------------------------------------------------------------------------|-------------------------------------------------------------------------------------------------------------------------------------------|
| <ul style="list-style-type: none"> <li>-Eritematoide</li> <li>-Esclerodermiforme</li> <li>-Pagetoide</li> </ul> | <ul style="list-style-type: none"> <li>-Simple</li> <li>-Ulcerado</li> <li>-Cicatricial</li> <li>-Ulcero-vegetante /tenebrante</li> </ul> |

#### I.3. FACTORES DE MAL PRONÓSTICO:

##### -CARACTERÍSTICAS HISTOLÓGICAS:

- Infiltrante, micronodular o morfeiforme
- Presencia de invasión vasculo-linfática

##### -LOCALIZACIÓN:

Área H facial:

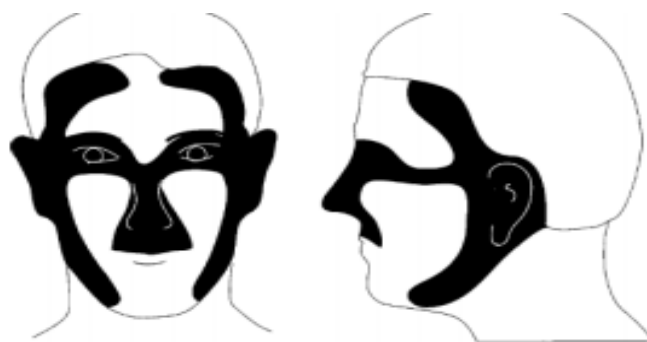**-TAMAÑO TUMORAL:**

- Área H: > 0.6 cm
- Área M (resto de cabeza y cuello que no sean zona H): >1cm
- Tronco y extremidades: >2cm

**I.4. CLASIFICACIÓN SEGÚN EL RIESGO:**

|       |                                                                                                                                                                                                          |
|-------|----------------------------------------------------------------------------------------------------------------------------------------------------------------------------------------------------------|
| ALTO  | <u>-Recurrentes</u><br><u>-Con datos histológicos de riesgo + 1 de:</u> <ul style="list-style-type: none"> <li>• Zona H</li> <li>• &gt;2 cm</li> </ul> Bordes mal definidos                              |
| MEDIO | <u>-Con datos histológicos de riesgo que:</u> <ul style="list-style-type: none"> <li>• Zona no H</li> <li>• &lt;2cm</li> <li>• Bordes bien definidos</li> </ul> <u>-Sin datos histológicos de riesgo</u> |
| BAJO  | -Ca basocelulares primarios superficiales                                                                                                                                                                |

**I.5. TRATAMIENTO INICIAL:**

|                                    |                                                                                                                                                                                                   |
|------------------------------------|---------------------------------------------------------------------------------------------------------------------------------------------------------------------------------------------------|
| ALTO RIESGO                        | <b>-Cirugía de Mohs</b> (valoración histológica intraoperatoria de los márgenes).<br>-Si contraindicación: <ul style="list-style-type: none"> <li>• Cirugía convencional</li> <li>• RT</li> </ul> |
| R. MEDIO                           | <b>-Extirpación quirúrgica + ampliación de márgenes</b><br>-Si contraindicación: RT<br>-Nodulares +<1cm+ área no H: considerar terapia fotodinámica                                               |
| R. BAJO (opciones, individualizar) | -Curetaje y electrodisecación<br>-Cirugía + ampliación de márgenes<br>-Terapia fotodinámica<br>-Imiquimod tópico<br>-Crioterapia.                                                                 |

### **I.6. RT ADYUVANTE:**

- Si MQ positivos y no es posible cirugía.
- Infiltración perineural extensa

### **I.7. ENFERMEDAD RECURRENTE NO OPERABLE NI RE-IRRADIABLE, LOCALMENTE AVANZADA IRRESECABLE O M1**

- Valorar RT radical.
- Valorar la posibilidad de realizar tratamiento dentro de ensayo clínico.
- Vismodegib 150mg/24h vo continuo

## **II. CARCINOMA ESPINOCELULAR PRIMARIO CUTÁNEO**

### **II.1. CLASIFICACIÓN:**

- BAJO RIESGO: carcinomas in situ

- ALTO RIESGO: Ca infiltrantes que cumplan alguna de las siguientes:

- Características clínicas:
  - Tamaño >2 cm / Tamaño <2cm pero rápido crecimiento (<3 semanas)
  - Localización: Área H, plantas, dorso de manos, genitales
  - Carcinomas recidivantes o que asienten sobre lesiones previas (RT, úlceras, cicatrices)
  - Inmunodeprimidos
- Características histológicas:
  - Pobre diferenciación.
  - Breslow >6mm y/o Clark IV
  - Infiltración perineural/vascular.

### **II.2 TRATAMIENTO INICIAL:**

#### **-Bajo Riesgo:**

- Curetaje y electrodisecación.
- Si alcanza tejido adiposo: Cirugía excisional con MQ 4-6mm y ampliación de márgenes si precisa.
- No candidatos a cirugía: valorar RT

#### **-Alto Riesgo:**

- Cirugía de Mohs o resección completa con ampliación de MQ posterior si precisa
- No candidatos a cirugía, valorar RT

\*En pacientes con tumores de **gran tamaño o con invasión en profundidad**, valorar tratamiento QT NEOADYUVANTE previo a cirugía o RT con combinación de cetuximab + QT citotóxica (5FU /cisplatino en combinación o solos). Comentar siempre en comité multidisciplinar.

### II.3- RT ADYUVANTE:

- Si margen quirúrgico afecto y no candidato a cirugía de ampliación de márgenes.
- Invasión perineural extensa.
- En enfermedad de alto riesgo en casos seleccionados tras valoración en comité.

### II.4. TRATAMIENTO DE LA ENFERMEDAD GANGLIONAR:

- Si adenopatías palpables o sospechosas identificadas en pruebas de imagen → confirmar mediante PAAF o Biopsia.
- Realización de estudio de extensión con **TC tórax-abdomen** (incluir SNC y cervical si se localiza en cabeza y pelvis si se localiza en extremidades inferiores) ó **PET-TC**.

Enfermedad operable: Cirugía. Considerar RT adyuvante si afectación ganglionar extensa o extensión extracapsular.

Enfermedad inoperable: RT +/- tratamiento sistémico concomitante (datos de casos aislados y estudios pequeños, no prospectivos con cetuximab solo o en combinación con QT citotóxica con platino o 5FU).

### II.5- ENFERMEDAD RECURRENTE NO RESECABLE Ó M1:

No datos de estudios prospectivos. Valorar:

-Régimen basado en cisplatino:

- CDDP 100mg/m<sup>2</sup> D1 + 5FU 1000mg/m<sup>2</sup> IC D1-5. 1 ciclo cada 21 días.
- Paclitaxel 80mg/m<sup>2</sup> semanal.

## III- CARCINOMA DE CÉLULAS DE MERKEL

- Presentación clínica como un nódulo dérmico solitario, indoloro, palpable, de coloración eritematoso-violeta. No suele estar ulcerado.
- Se suele asociar a inmunodepresión y exposición a radiación UV. Más frecuente en >50 años. Expansión rápida.

### III.1. EVALUACIÓN INICIAL:

- Exploración física** buscando lesiones satélite y adenopatías regionales.
- Biopsia** escisional
- TC de tórax y abdomen** (descartar 1º pulmonar y diseminación a distancia).
- PET-TC** puede ser útil en pacientes con tumor 1º oculto.
- Diagnóstico diferencial con el ca de pulmón de célula pequeña mediante IHQ: TTF1 y CK7 positivas en CPCP y negativas en CCM. El marcador más específico de CMM es la CK20 (positivo en aproximadamente el 90%).

### III.2. ENFERMEDAD NO CLÍNICA:

-Cirugía de la lesión: escisión amplia con margen quirúrgico 1-2 cm (en caso de lesiones de menos de 2 cm se considera adecuado un margen de 1 cm). Considerar cirugía de Mohs en localizaciones especiales.

-Considerar RT adyuvante en pacientes de alto riesgo (inmunosupresión profunda, localización en cabeza y cuello, no posibilidad de realizar técnicas IHQ adecuadas, afectación de márgenes quirúrgicos) vs Observación (sobre todo si lesiones extensamente reseçadas, <1cm, no inmunodeprimidos, sin invasión vasculolinfática).

-BSGC: No estándar. Valorar en comité multidisciplinar.

Si positiva: linfadenectomía y/o RT

Si negativa: Observación.

-Tratamiento sistémico adyuvante NO indicado

-Si no es posible cirugía, considerar RT

### III.3. ENFERMEDAD N+

-Manejo del tumor primario (ver arriba)

-PAAF/Biopsia de la adenopatía:

- Si positiva: Realizar estudio de extensión. Linfadenectomía y/o RT (si afectación ganglionar extensa o extracapsular). Tratamiento sistémico adyuvante NO recomendado de rutina (no EC prospectivos que demuestren beneficio en supervivencia, tampoco demostrada en estudios retrospectivos). Valorar tratamiento adyuvante dentro de EC si posible. Se puede considerar tratamiento adyuvante con platino-etopósido dado el alto riesgo de recidiva: **Carboplatino AUC 5-6 / Cisplatino 80 mg/m<sup>2</sup> D1 + Etopósido 100mg/m<sup>2</sup> D1-3 iv (o vo en D 2 y3) 1 ciclo cada 21 días x 3 ciclos.**
- Si negativa: Observación.

-Si no es posible cirugía, considerar RT

### III.4. ENFERMEDAD M1:

- Si disponible, valorar realizar tratamiento dentro de EC.
- En pacientes fit para recibir cisplatino/carboplatino la primera línea de tratamiento será:  
Cisplatino 80 mg/m<sup>2</sup> D1 + Etopósido 100mg/m<sup>2</sup> D1-3 iv (o vo en D 2 y3) 1 ciclo cada 21 días (máx 4-6 ciclos).  
En caso de contraindicación a cisplatino (insuficiencia renal, patología auditiva,...) utilizar Carboplatino AUC 5-6.
- Tratamiento con inmunoterapia: Se debe comentar el caso en sesión clínica y su uso debe ser autorizado. Se indicará en pacientes con ECOG 0-1 en segunda línea o en pacientes unfit para platino, pero con ECOG 0-1, en primera línea:

- **Avelumab 10 mg/kg iv 1 ciclo cada 2 semanas.** Datos de estudio fase II (JAVELIN 200 Merkel) en pacientes con CCM M1 en 1ºL y en 2ºL tras progresión a quimioterapia (Aprobado por FDA y EMA en esta indicación).

- **Pembrolizumab 2mg/kg 1 ciclo cada 3 semanas iv.** Datos de fase II: *Nghiem P et al, N Engl J Med 374;26. June 2016.* Pacientes con CCM M1 en 1ºL.

-**Nivolumab 240 mg cada 2 semanas iv.** Datos de estudio fase I/II CheckMate 358 en pacientes con diferentes tipos de cáncer avanzado asociados a virus que habían progresado a, al menos, 2 líneas de tratamiento previas.

-Esquemas de QT citotóxica a valorar en líneas posteriores:

- CAV: Ciclofosfamida 1000 mg/m<sup>2</sup> D1 + Adriamicina 40mg/m<sup>2</sup> D1 + Vincristina 1mg/m<sup>2</sup> (máx 2mg) D1 1 ciclo cada 3 semanas. Alternativa en pacientes fit con alguna contraindicación para el tratamiento con platinos o tras progresión al mismo.

-Topotecán 1,5 mg/m<sup>2</sup> D1-5 iv/vo 1 ciclo cada 21 días. Alternativa si contraindicación a tratamiento con platinos / unfit para esquemas de poliquimioterapia.

-Paclitaxel 80mg/m<sup>2</sup> iv semanal en monoterapia. Alternativa si contraindicación a tratamiento con platinos / unfit para esquemas de poliquimioterapia.

\*RT paliativa

\*Cirugía: enfermedad oligometastásica o lesiones sintomáticas.

\*Cuidados de soporte en caso de no ser candidato a tratamiento activo.

### III.5. SEGUIMIENTO:

- Exploración física completa de piel y adenopatías:

- cada 3-6 meses los 3 primeros años
- Cada 6-12 meses a partir del 4º año.

- Pruebas de imagen y otros estudios complementarios según indicación clínica. Valorar pruebas de imagen de rutina en pacientes de alto riesgo.

### III.6. RECURRENCIA:

-Local /locoregional: Individualizar tratamiento. Comentar el caso en comité multidisciplinar

-A distancia: ver apartado 4.



## Linfoma no Hodgkin

Siempre se procurará que la **biopsia diagnóstica incluya un ganglio intacto**.

En el informe patológico se utilizará la **CLASIFICACIÓN OMS** de 2016 (Ver apéndice).

### I. ESTUDIO DE EXTENSIÓN:

**Anamnesis y Exploración Física** completa, incluyendo **exploración ORL**.

- **Hemograma** completo con **VSG** y **frotis de sangre periférica**.
  - **Bioquímica sérica** con función renal, hepática, LDH y calcemia.
  - **$\beta$ 2-microglobulina**.
  - **Proteinograma** y cuantificación de **inmunoglobulinas G, A y M**.
  - Serología de **hepatitis B, C y HIV**.
  - Serología de **Borrelia** en LNH B cutáneos.
  - Serología **H. Pylori** en LNH MALT gástrico.
  - Bioquímica elemental de **orina**.
  - **Radiografía de tórax**. (sí creemos debe hacerse para futuros controles de toxicidad)
  - **TAC cervicotoracoabdominopélvico**.
  - **Biopsia de médula ósea** (en los linfomas foliculares en estadios I ó II candidatos a radioterapia de campo afecto se realizará **citometría de flujo** de médula ósea).
  - **PET**: en todos los linfomas difusos de células grandes o LNH folicular G3b y en linfoma folicular estadio I-II que vaya a recibir tratamiento exclusivo con radioterapia. En los demás casos se considera una prueba opcional aunque muy recomendable en todos los linfomas con avidez por la glucosa.
  - **Estudio de LCR** (citología, glucosa, proteínas y LDH) en caso de:
    - Afectación testicular o parameningea.
    - LDH alta y afectación de un órgano extranodal.
    - Afectación de  $\geq 2$  órganos extraganglionares.
    - Linfoma linfoblástico o indiferenciado de células pequeñas (Burkitt).
  - **Citología de líquido pleural o ascítico** si existen.
  - **Fibrogastroscofia +/- tránsito esogagogastroduodenal o intestinal** si:
    - Sospecha clínica o radiológica de afectación digestiva.
    - Afectación ORL.
    - LNH manto: gastroscopia y colonoscopia.
  - **Gammagrafía ósea o Rx** si se sospecha afectación de la cortical ósea (**no es necesario si se ha realizado un PET en la estadificación**).
  - Ofrecer en todos los pacientes que deseen descendencia la posibilidad de criopreservar semen u ovocitos.
- En pacientes con linfomas agresivos o de alta agresividad debatir con el paciente y familiares el riesgos de progresión de la enfermedad ocasionados por el retraso del tratamiento (especialmente en mujeres).

## **II. SISTEMA DE ESTADIFICACIÓN: ANN ARBOR, SIMPLIFICADO (VER apéndice)**

## **III. CLASIFICACION DE LOS LINFOMAS SEGÚN COMPORTAMIENTO CLÍNICO: (ver apéndice)**

## **IV. LINFOMAS INDOLENTES: CRITERIOS DE TRATAMIENTO EN ESTADIOS III-IV:**

Criterios de GELF:

- Masa > 7 cm
- Esplenomegalia palpable sintomática
- Tres áreas ganglionares con adenopatías de >3 cm separadas (las 3)
- Síndrome de compresión orgánica
- Derrame pleural o peritoneal
- LDH elevada.
- Síntomas B
- > 5000 linfocitos clonales circulantes
- Citopenias por afectación medular (< 1000 neutrófilos o < 100.000 plaquetas)

### **IV.1. LINFOMAS INDOLENTES; Linfoma Folicular**

En todos los casos **se repetirán las pruebas alteradas al diagnóstico** después del 3º y 6º ciclos de QT o tras el 4º y 8º ciclo en el caso de LNH de bajo grado **tratado con R-CVP**.

**FLIPI: ÍNDICE PRONÓSTICO INTERNACIONAL PARA LNH FOLICULARES FLIPI (Blood 2004;104:1258) (Apéndice)**

### **ESTADIOS I-II:**

- Estadios I-II no bulky (ninguna masa > 7 cm) y ECOG 0-1: Radioterapia campo afecto 24 Gy (12 fracciones de 200 cGy), seguido de 6 ciclos de R-CVP.
- Estadios I-II bulky: mismo tratamiento que los estadios avanzados.
- Pacientes de edad avanzada y/o en los que se tema por toxicidad de la radioterapia se valorará en función de los síntomas: Observación vs “minidose” 4 Gy fracción única. Se puede repetir a partir de las 6 semanas si no respuesta.
- Seguimiento en pacientes unfit por edad o comorbilidades o por deseo del paciente.
- En adolescentes con linfoma folicular estadio I tras estudio de extensión exhaustivo, se valorará seguimiento hasta progresión si en la biopsia se extirpó toda la enfermedad macroscópica (PET/TC negativo para neoplasia realizado no antes de las 6-8 semanas de la biopsia).

### **ESTADIOS III-IV:**

#### **a. Paciente asintomático/baja carga tumoral (sin ningún criterio GELF):**

- Opción prioritaria: Seguimiento (revisiones clínicas, hemograma y bioquímica elemental con LDH cada 4 meses, TAC anual)

- Opción para pacientes que deseen tratamiento inmediato: Rituximab (375 mg/m<sup>2</sup>) semanal x 4 semanas.

**b. Pacientes sintomáticos (con al menos 1 criterio GELF):**

- **R-Bendamustina x 4-6 ciclos** (4 si Respuesta Completa en el PET/TC realizado tras el tercer ciclo) + rituximab de mantenimiento c/3 m x 2 años.
- **R-CHOP x 6 ciclos + rituximab de mantenimiento** c/3 m x 2 años. Opción prioritaria en caso de muy alta carga tumoral o alta sospecha clínica de transformación (aunque no se haya confirmado en la biopsia).
- **R-CVP x 8 ciclos + rituximab de mantenimiento** c/3 m x 2 años. Opción prioritaria en pacientes mayores de 70 años.
- En pacientes menores de 70 años con ECOG 0-2 y contraindicación mayor a recibir bendamustina o CHOP por cualquier causa médica, se valorará la utilización del esquema **R2 (rituximab + lenalidomida)** tras presentación en sesión clínica y solicitud por uso “off label” (*Morschhauser, F., et al. New England Journal of Medicine 2018, 379(10), 934–947*).
- Opciones de tratamiento con intención exclusiva de **control de síntomas (paliación)**:
  - Ciclofosfamida 100 mg/día x 4 semanas/6 semanas + prednisona 10 mg/día. La prednisona se mantendrá hasta conseguir mejoría clínica significativa y no más de 12 semanas.
  - Tratamiento paliativo con clínica local exclusiva: “minidose” 4 Gy fracción única. Se puede repetir a partir de las 6 semanas si no respuesta.

**c. Consideraciones especiales:**

- Linfoma Folicular Grado 3b debe ser tratado como un LBDCG.
- En linfoma Folicular 3a valorar R-CHOP en lugar de R-Bendamustina.

## **IV.2. LINFOMAS INDOLENTES: NO FOLICULAR**

Se tratan igual que los linfomas foliculares (sin administrar mantenimiento con rituximab), salvo las situaciones especiales que se enumeran a continuación.

## **IV.3. OTROS LINFOMAS INDOLENTES: Situaciones especiales**

### **IV.3.a. Linfoma linfoplasmocítico (Macroglobulinemia de Waldenström)**

- Asintomáticos con Hb > 10 g/dl y Plaquetas > 100.000: Seguimiento
- Sintomáticos o con Hb < 10 g/dl y Plaquetas < 100.000: Tratamiento.
- Síntomas de hiperviscosidad: Plasmaféresis urgente (Ver apéndice).

Primera línea: **R-Bendamustina x 4-6 ciclos o rituximab/dexametasona/ciclofosfamida**. En pacientes no candidatos a quimioterapia se puede plantear R-Ibrutinib. (Dimopoulos MA, N Engl J Med. 2018; 378(25): 2399.).

Recaídas:

> 3 años: Repetir esquema.

< 3 años, esquemas alternativos: DRC (Dexametasona Rituximab Ciclofosfamida); Bortezomib+ Rituximab, Rituximab en monoterapia...

#### IV.3.b. Linfoma MALT GÁSTRICO:

- Estadio I con H pylori demostrado, sin masa exofítica gástrica y sin infiltración de la muscular en la ecoendoscopia: Terapia OCA: Amoxicilina 1 gr/8 h x 7 días + Claritromicina 500 mgr/12 h x 7 días + Omeprazol 20 mg x 14 días
- Estadio I con fallo a antibióticos o H. pylori no demostrado:
  - **Radioterapia (30G y en 20 fracciones de 1,5 Gy). (Opción preferente)**
  - R-CHOP x 6 ciclos.
  - Tratamiento quirúrgico si no implica gastrectomía total.

#### IV.3.c. LINFOMA ORBITARIO:

- Radioterapia 24 Gy (12 x 200 cGy si Linfoma Folicular) 30 Gy (15 x 200 cGy) si MALT.

#### IV.3.d. LNH LINFOCÍTICO DE CÉLULAS PEQUEÑAS: Estadificación del riesgo (Ver apéndice)

Para el manejo (estadificación, tratamiento y seguimiento) de este linfoma se seguirán las recomendaciones de la Guía Nacional de Leucemia Linfática Crónica y Linfoma Linfocítico recientemente publicada (febrero de 2019).

A modo de ejemplo se presenta el algoritmo de tratamiento de primera línea para los pacientes sintomáticos. Los asintomáticos serán seguidos sin tratamiento.

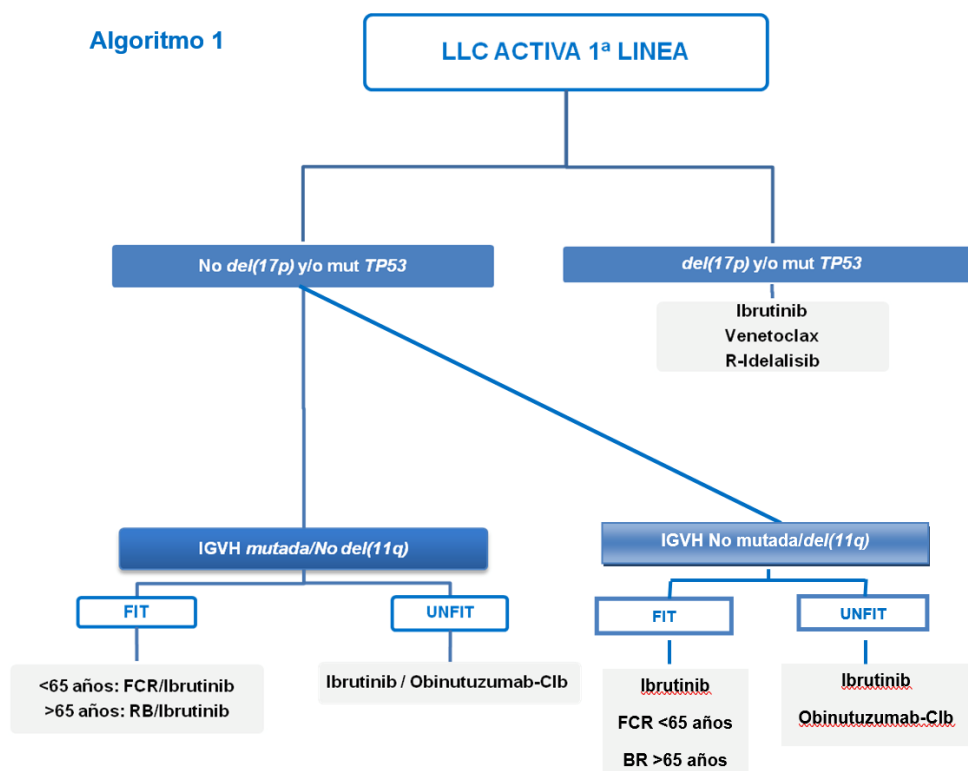

## **V. TRATAMIENTO DE LA RECAÍDA / PROGRESIÓN Y REFRACTARIOS DE LOS LINFOMAS B INDOLENTES:**

### **RESPUESTAS PARCIALES TRAS PRIMERA LÍNEA:**

- Asintomáticos: Seguimiento. Tratamiento según criterios de GELF.
- Sintomáticos: Igual que las recaídas.

### **REFRACTARIOS Y RECAIDAS (Excepto Linfocítico):**

- Pacientes candidatos a **QAD** (< 50 años y tras discusión individual con el paciente): **R-GPD x 3- 6 Ciclos- QAD- TASPE**
- Resto de pacientes:
  - Asintomáticos:- Seguimiento
  - Rituximab monoterapia ± mantenimiento (dependiendo de si lo han recibido en 1ª línea y del tiempo transcurrido)
  - Sintomáticos:
    - **ILT > 6 m:** Según tratamiento previo y discusión con el paciente existen varias opciones:
      - Rituximab en monoterapia + R mantenimiento
      - R-CHOP x 6 + R mantenimiento
      - R-CVP x 8 + R mantenimiento
      - R-Bendamustina x 4-6 + R mantenimiento
      - Zevalin.
      - R2 en Linfoma folicular.
    - **ILT < 6 m:**
      - Si no ha recibido bendamustina en primera línea**
        - Obinutuzumab/bendamustina seguido de obinutuzumab de mantenimiento.
      - Si ha recibido bendamustina en primera línea**
        - Zevalin.
        - Obinutuzumab/CHOP seguido de obinutuzumab de mantenimiento (a discutir en sesión clínica, esquema no financiado).

### **B. ECOG 3 - 4:**

- Tratamiento paliativo con intención de control de síntomas.
- Ciclofosfamida + Prednisona oral.
- RT paliativa.

## **VI. SEGUNDAS RECAÍDAS Y SIGUIENTES:**

- **LNH FOLICULAR (Refractarios a Rituximab y no candidatos a O-Bendamustina)→** Idelalisib monoterapia 150 mg v.o. cada 12 horas hasta progresión (Necesario Septrim forte L-X-V) así como PCR CMV.
- **FLUDARABINA x 4 ciclos→** Buena reserva medular.
- **Radioinmunoterapia** ( $^{90}\text{Y}$  Ibritumomab tiuxetan- Zevalin®): ECOG < 2, >100.000 plaquetas e infiltración de menos del 25% de la médula ósea.

## **VII. LNH AGRESIVOS:**

### **Estadificación LBDCG (Ver anexo)**

**VII.1- PRIMERA LINEA:** Los esquemas de QT irán sin Rituximab si el linfoma no expresa CD20.

#### **VII.1.a. Estadíos I – II con aalPI 0 + :**

- R-CHOP / 21 x 4 ciclos.

**RT complementaria** (ISRT 30 Gy) en caso de:

- N > 10 cm (ó Bulky mediastínico >1/3 diámetro del tórax).
- T4, si extranodal.
- PET + tras finalizar QT.

#### **VII.1.b. Resto estadíos I-II:**

R-CHOP/21 por 6 ciclos.

ó

R-CHOP/14 x 6 en todos los pacientes con linfoma primario B mediastínico (independientemente del estadio) y en pacientes jóvenes (menores de 60 años) que deseen un acortamiento del tiempo de tratamiento por motivos personales.

RT complementaria (ISRT 30 Gy sobreimpresión 36 Gy sobre masa Bulky inicial o lesión residual) en caso de:

- N > 10 cm (Bulky mediastínico >1/3 diámetro del tórax). Excepto en los pacientes con linfoma B primario de mediastino que sólo se irradiarán si el PET es positivo tras 6 semanas de la finalización de los 6 ciclos de R-CHOP/14).
- T4, si extranodal.
- PET + tras finalizar QT.

#### **VII.1.c. Estadíos III-IV:**

R-CHOP/21 por 6 ciclos (R-CHOP/14 x 6 ciclos en pacientes jóvenes (menores de 60 años) que deseen un acortamiento del tiempo de tratamiento por motivos personales ).

\* RTE complementaria ISRT 30 Gy sobreimpresión 36 Gy sobre masa Bulky inicial o lesión residual (sólo en caso de PET positivo local a las 4-6 semanas de finalizada la quimioterapia).

## VII.2. CONSIDERACIONES ESPECIALES EN EL TRATAMIENTO DE 1ª LINEA:

### 1- Si RC tras tratamiento inicial: PROFILAXIS SNC

#### Indicaciones:

- Afectación testicular.
- Afectación parameningea.
- LDH elevada + afectación extranodal.
- Afectación de mama y órbita (Guideline on the prevention of secondary central nervous system lymphoma: British Committee for Standards in Haematology.)

**Protocolo:** HDMTX 3gr/m<sup>2</sup> x 2 dosis. El tratamiento se administrará, si es posible el día 10 de los ciclos 2 y 3. Si no es posible, se iniciará a las 3-4 semanas del último ciclo de QT y se repetirá a las 2 semanas.

### 2- Afectación del SNC:

- R-CHOP/21 (CHOP/21 si CD20-) independientemente de la edad.
- +
- MTX 12 mg. intratecal los días 1 y 10 de cada ciclo x 10 dosis (5 ciclos).
  - HDMTX 3 gr/m<sup>2</sup> el día 10 del 1º y 2º ciclos.

### 3- Linfoma en paciente HIV+:

Se tratarán igual que los pacientes HIV negativos si la carga viral está controlada con TARGA, tienen > 100 CD-4 y no han tenido infecciones definitorias de SIDA en los últimos 6 meses. En caso contrario se tratarán igual pero sin Rituximab.

Siempre asociado a G-CSF y septrim profiláctico.

### 4- Linfoma doble/triple hit (traslocación myc y bcl2/bcl6):

En pacientes menores de 65 años con LDCGB Burkitt-like o doble/triple hit valorar tratamiento con DA-R-EPOCH. (Petrich AM. Blood 2014;124:2354-61; Oki Y. B J Hematol 2014;166:891-901)

### 5.- Quimioterapia de enfriamiento:

En todos los pacientes con linfomas agresivos y mal estado general al diagnóstico (ECOG 3-4) valorar quimioterapia de enfriamiento antes de iniciar el protocolo definitivo. Los esquemas de enfriamiento serían (según las características clínicas y analíticas del paciente):

- Esquema de elección: Vincristina 1 mg (dosis total), días 1 y 8. Prednisona 100 mg/día v.o. durante 7 días (iniciar quimioterapia estándar el día 15).
- Prednisona 100 mg/día v.o durante 7 días.
- Ciclofosfamida 1 gr iv + Prednisona 100 mg/día v.o durante 7 días ( en caso de deterioro severo de la función hepática).

### VII.3. TRATAMIENTO DE LAS RECAÍDAS, REFRACTARIOS Y RP:

- Paciente candidato a QAD (<65 años): R-GPD o R-ICE x 3-6 ciclos - QAD
- Paciente no candidato a QAD: R-GEMOX x 8 ciclos +/- RTE complementaria.

*Valorar la combinación de r-benda/polatuzumab cuando exista indicación EMA y financiación.*

### VII.4. TRATAMIENTO DE SEGUNDAS RECAÍDAS Y SIGUIENTES:

Tratamiento paliativo individualizado

- **MINE** (como quimioterapia de tercera línea). Se asociará rituximab sólo en el caso de que la respuesta a segunda línea haya durado más de 6 meses.
- Pixantrona 85 mg/m<sup>2</sup> d1, 8 y 15 c/28 días. Máx 6 ciclos.
- ICE en pacientes jóvenes seleccionados.
- R-lenalidomida (esquema de segunda línea del linfoma folicular) en pacientes seleccionados tras discusión en sesión clínica y solicitud por uso off label.

## VIII LINFOMA DEL MANTO:

### VIII.1. PRIMERA LINEA:

- Pacientes mayores de 60 años y ECOG  $\leq 1$  o ineligibles para trasplante o bien pacientes jóvenes que se nieguen a trasplante: R-BAC500 x 4-6. ([Lancet Haematol](#). 2017 Jan;4(1):e15-e23).
- Pacientes mayores de 70 años o ECOG  $\geq 2$ : R-bendamustina x 6 ciclos. En los pacientes que alcancen RC/RP valorar rituximab de mantenimiento (375 mg/m<sup>2</sup> cada 3 meses durante 2 años (valorar según linfopenia y niveles de Ig G).
- Pacientes entre 45 y 60 años: R-CHOP x 3 seguido de R-DHAP x 3 seguido en los respondedores de BEAM y TASPE (se movilizarán células progenitoras después del segundo o tercer DHAP). Rituximab de mantenimiento opcional.
- Pacientes menores de 45 años y ECOG  $\leq 1$ : Rituximab + HYPER-CVAD/MTX-ARA-C (**Esquema y soporte ver anexo**) modificado x 6-8 ciclos (según el momento en que se objeive la RC). Los ciclos se administrarán c/3 sem, aunque pueden iniciarse a partir del día 15 siempre que el recuento de neutrófilos sea >1000/ $\mu$ L y el de plaquetas >75.000/ $\mu$ L

### VIII.2 TRATAMIENTO DE LA RECAIDA:

- Pacientes <65 años: R-GPD. Valorar TASPE (en caso de no haber recibido quimioterapia intensiva con anterioridad).
- Pacientes >65 años o recaídas tras TASPE: Mismas opciones que en segundas recaídas.



**VIII.3. TRATAMIENTO SEGUNDA RECAIDA (tercera línea):**

- Ibrutinib 520 mg/d v.o. hasta progresión (Dreyling M. Lancet 2016;387:770-778)
- R-Bendamustina
- R-CHOP
- Otras: Velcade, lenalidomida, R-temsirolimus, Zevalin o QT basada en Fludarabina de forma individualizada.

**IX. LNH DE ALTO GRADO DE AGRESIVIDAD:**

(Thomas DA, Cancer 2006, vol 106, n 7)

(Thomas DA, Blood 2004, vol, 104, n 6)

Se tratarán con el esquema **Hyper-CVAD/MTX-ARA-C +/- RITUXIMAB** igual que el linfoma del manto pero con las siguientes modificaciones:

- **L. Linfoblástico:** En esta indicación se administrarán 8 ciclos con profilaxis meníngea y con mantenimiento. Debe realizarse profilaxis del síndrome de lisis tumoral en el primer ciclo.
- **L. Burkitt:** En esta indicación se administrarán 8 ciclos con profilaxis meníngea. Debe realizarse profilaxis del síndrome de lisis tumoral en el 1º ciclo. En pacientes de más de 40 años o con comorbilidad valorar el esquema DA-R-EPOCH.

**Profilaxis meníngea: Todos los ciclos**

|                     |                                    |        |
|---------------------|------------------------------------|--------|
| <b>Methotrexate</b> | 12 mg intratecales. Total 4 dosis  | día 2  |
| <b>Ara-C</b>        | 100 mg intratecales. Total 4 dosis | día 10 |

**Tratamiento de la afectación meníngea:**

Sólo en caso de que haya evidencia clínica, radiológica o citológica de afectación neuromeníngea. Se administraran 2 intratecales a la semana (una de MTX y otra de ARA-C a las dosis arriba indicadas) hasta que la citología sea negativa para células malignas. Posteriormente se continuará con una administración semanal (alternando MTX y ARA-C) durante 4 semanas más.

**Radioterapia sobre el mediastino:**

Sólo se administrará a pacientes con linfoma linfoblástico, con masa residual PET positiva tras la quimioterapia de inducción (dosis 30-39 Gy).

**Tratamiento de mantenimiento:**

Sólo se administrará a pacientes con linfoma linfoblástico. Se iniciará a las 8 semanas de la finalización del tratamiento de inducción o a las 4 semanas de la finalización de la irradiación mediastínica (en caso de ser necesaria).

- **Mes 1 a 6:** un ciclo mensual del esquema **POMP**:
  - **6-mercaptopurina** 50 mgr c/8 h vo (continuo).
  - **Methotrexate** 20 mg/m<sup>2</sup> vo ó iv. semanal.
  - **Vincristina** 1,4 mg/m<sup>2</sup> (máx 2 mg) x 1 día (cada 4 semanas).

- **Prednisona** 100 mg vo. x 5 días (la semana de la vincristina).
- **Mes 7:** un ciclo de **MTX/Asparraginasa**.
  - **Methotrexate** 100 mg/m<sup>2</sup> semanales en 1 h x 4 sem (día 1).
  - **L-Asparraginasa** 20.000 U iv. semanales x 4 sem (día 2).
- **Mes 8, 9 y 10:** un ciclo mensual del esquema **POMP** (ver arriba).
- **Mes 11:** un ciclo de **MTX/Asparraginasa** (ver arriba).
- **Mes 12 a 24:** un ciclo mensual del esquema **POMP** (ver arriba).

**Tratamiento antibiótico de soporte:** Durante la fase de mantenimiento:

- Septrim forte® 1 comp/12 horas, 2 días a la semana.
- Aciclovir 200 mg/12 horas v.o.

## **X. LNH CEREBRAL PRIMARIO Y LINFOMA INTRAOCULAR PRIMARIO:**

### **X.1. Diagnóstico y estadificación**

No usar corticoides antes de realizar la biopsia.

Se recomienda la biopsia esterotáxica como técnica diagnóstica mínimamente invasiva. La resección quirúrgica sólo se recomienda cuando la biopsia esterotáxica no es posible.

En todos los pacientes se debe realizar RMN cerebral y de neuroeje con gadolinio, citología de LCR y estudio de fondo de ojo.

En los varones de más de 60 años se recomienda la realización de una ecografía testicular.

### **X.2. Tratamiento**

- **Pacientes mayores de 60 años:**

**Opción si buen estado general:** R-HD-MTX 3,5 gr/m<sup>2</sup> cada 2 semanas por 6 ciclos. No se indica tratamiento intratecal.

- Remisión completa: seguimiento.
- Remisión parcial: RT 45 Gy.
- No respuesta y aceptable estado general: radioterapia 45 Gy.

**Opción si mal estado general, comorbilidades severas o déficit funcional neurológico severo:** radioterapia aislada.

- **Pacientes menores de 60 años**

Esquema R-Matrix por 4 ciclos: methotrexate, cytarabine, thiotepa, y rituximab (Ferreri AJ, et al. Lancet Hematol 2016; 3:ve217-27).

- Respuesta completa o parcial: comentar con el paciente consolidación con QAD (rituximab 375 mg/m(2) [day 1], carmustine 400 mg/m(2) [day 2], thiotepa 2 x 5 mg/kg [days 3 and 4], and infusion of stem cells [day 7] seguida de TACPH. (Illergahus G, et al. Lancet Oncol 2016; 3: e 888-97)
- No respuesta o no respuesta completa tras QAD o no QAD: RT 45 Gy.

## **XI. ASPECTOS ESPECÍFICOS PARA EL TRATAMIENTO DE LOS LINFOMAS T PERIFÉRICOS**

### **TRATAMIENTO DE PRIMERA LÍNEA**

- **Linfoma anaplásico T CD 30 y ALK positivo**

Estadios iniciales

- CHOP/21 por 6 ciclos

#### Estadios avanzados

Pacientes menores de 65 años

- CHOEP por 6 ciclos.

Pacientes mayores de 65 años o con comorbilidades

- CHOP por 6 ciclos.

- **Linfoma anaplásico CD 30 + ALK negativo**

Pacientes menores de 65 años

- CHOEP por 6 ciclos.

Pacientes mayores de 65 años o con comorbilidades

- CHOP por 6 ciclos.

- **Linfoma T/NK nasal**

- **Estadio localizado (I/II)**

Radioterapia sobre todo el volumen tumoral macroscópico (45 Gy) con cisplatino semanal (40mg/m<sup>2</sup>/semaba) concomitante. Una vez recuperada la mucositis aguda se administrarán 3 ciclos de VIPD (vera abajo). En caso de enfermedad muy sintomática o bulky puede alterarse la secuencia VIPD x 3 seguido de radioterapia sobre todo el volumen tumoral macroscópico (45 Gy) con cisplatino semanal (40mg/m<sup>2</sup>/semaba) concomitante.

- **Estadios avanzados (III/IV):**

Esquema DDGP x 6 ciclos en pacientes fit con buen estado general y menores de 60 años. En caso de no poder disponer de aparaginasa pegilada se utilizará el esquema SMILE (significativamente más tóxico). (Li X, et al. Clin Cancer Res 2016; 22: 5223-5228).

**Table 1.** The DDGP and SMILE regimens

| Agents        | Dose                      | Route        | Timing of treatment |
|---------------|---------------------------|--------------|---------------------|
| <b>DDGP</b>   |                           |              |                     |
| PEG-Asp       | 2,500 IU/m <sup>2</sup>   | IM           | Day 1               |
| Gemcitabine   | 800 mg/m <sup>2</sup>     | IV           | Days 1 and 8        |
| Cisplatin     | 20 mg/m <sup>2</sup>      | IV           | Days 1-4            |
| Dexamethasone | 15 mg/m <sup>2</sup>      | IV           | Days 1-5            |
| <b>SMILE</b>  |                           |              |                     |
| Methotrexate  | 2 g/m <sup>2</sup>        | IV (6 hours) | Day 1               |
| Dexamethasone | 40 mg/m <sup>2</sup>      | IV           | Days 2-4            |
| Ifosfamide    | 1,500 mg/m <sup>2</sup>   | IV           | Days 2-4            |
| Mesna         | 300 mg/m <sup>2</sup> × 3 | IV           | Days 2-4            |
| Etoposide     | 100 mg/m <sup>2</sup>     | IV           | Days 2-4            |
| L-Asp         | 6,000 U/m <sup>2</sup>    | IV           | Days 3-9            |

NOTE: Cycles of DDGP and SMILE regimen were repeated every 21 days.

Abbreviations: IM, intramuscularly; IV, intravenously; L-Asp, L-asparaginase; PEG-Asp, pegaspargase.

Esquema VIPD en pacientes no candidatos al esquema DDGP/SMILE: etoposido a 100 mg/m<sup>2</sup> en días 1 a 3, ifosfamida a 1.2 g/m<sup>2</sup> en días 1 a 3, mesna a 240 mg/m<sup>2</sup> en días 1 a 3, cisplatino a 33 mg/m<sup>2</sup> en días 1 a 3 y dexametasona 40mg/m<sup>2</sup> en días 1 a 4 (Kim SJ, et al. J Clin Oncol 2009; 27: 6027-32).

- **Resto de linfomas T periféricos**

**Pacientes menores de 65 años**

- CHOEP por 6 ciclos, consolidación con QAD y TASPE en respondedores (RC o RP).

**Pacientes mayores de 65 años o con comorbilidades**

- CHOP por 6 ciclos.

## TRATAMIENTO DE RESCATE

### **Segunda línea en linfoma anaplasico CD 30 positivo (independientemente de ALK):**

Brentuximab vedotin: 1.8 mg/kg cada 3 semanas por 4 ciclos (remitir al paciente a la Unidad de trasplante del Hospital Regional):

- Respuesta completa: mantener BV de 8 a 16 ciclos según tolerancia.
- Reapuesta parcial: QAD + TACPH.

### **Tercera línea en linfoma anaplasico CD 30 positivo y ALK positivo):**

Alectinib (uso off label) hasta progresión o intolerancia.

El resto de recaídas en estos pacientes se tratarán igual que los linfomas B agresivos sin rituximab.

## **XII. SEGUIMIENTO:**

- 1º- 4º año: Cada **6 meses**:

- Anamnesis y exploración física
- Análítica general con VSG y LDH
- IgG en los pacientes tratados con Rituximab
- TAC cervicotorácicoabdominopélvico (**Anual a partir del segundo año**)

- Posteriormente: Se realizará anualmente con analítica, Rx tx y ecografía.

- **LINFOMA MALT GASTRICO I<sub>AE</sub>**: **Gastroscopia con biopsias múltiples y estudio de H. Pylori** al mes de finalizar el tratamiento antibiótico y luego cada tres meses hasta RC o progresión.

## APÉNDICE - LINFOMA NO HODGKIN

### Clasificación OMS

#### Mature B-cell neoplasms:

*Chronic lymphocytic leukemia/small lymphocytic lymphoma*  
*Monoclonal B cell lymphocytosis<sup>b</sup>*  
 B cell prolymphocytic leukemia  
 Splenic marginal zone lymphoma  
 Hairy cell leukemia  
 Splenic B cell lymphoma/leukemia, unclassifiable<sup>a</sup>  
     Splenic diffuse red pulp small B cell lymphoma<sup>a</sup>  
     Hairy cell leukemia variant<sup>a</sup>  
*Lymphoplasmacytic lymphoma*  
     Waldenström macroglobulinemia  
 Extranodal marginal zone lymphoma of mucosa-associated lymphoid tissue (MALT lymphoma)  
 Nodal marginal zone lymphoma  
     Pediatric nodal marginal zone lymphoma<sup>a</sup>  
*Follicular lymphoma*  
     In situ follicular neoplasia<sup>b</sup>  
     Duodenal-type follicular lymphoma<sup>b</sup>  
*Pediatric-type follicular lymphoma<sup>b</sup>*  
*Large B cell lymphoma with IRF4 rearrangement<sup>a,b</sup>*  
 Primary cutaneous follicle center lymphoma  
*Mantle cell lymphoma*  
     In situ mantle cell neoplasia<sup>b</sup>  
*Diffuse large B cell lymphoma (DLBCL), NOS*  
     Germinal center B cell type<sup>b</sup>  
     Activated B cell type<sup>b</sup>  
 T cell/histiocyte-rich large B cell lymphoma  
 Primary DLBCL of the central nervous system (CNS)  
 Primary cutaneous DLBCL, leg type  
*EBV+ DLBCL, NOS<sup>b</sup>*  
*EBV+ mucocutaneous ulcer<sup>a,b</sup>*  
 DLBCL associated with chronic inflammation  
 Lymphomatoid granulomatosis  
 Primary mediastinal (thymic) large B cell lymphoma  
 Intravascular large B cell lymphoma  
 ALK+ large B cell lymphoma  
 Plasmablastic lymphoma  
 Primary effusion lymphoma  
 HHV8+ DLBCL, NOS<sup>a,b</sup>  
*Burkitt lymphoma*  
*Burkitt-like lymphoma with 11q aberration<sup>a,b</sup>*  
*High-grade B cell lymphoma, with MYC and BCL2 and/or BCL6 rearrangements<sup>b</sup>*  
*High-grade B cell lymphoma, NOS<sup>b</sup>*  
 B cell lymphoma, unclassifiable, with features intermediate between DLBCL and classical Hodgkin lymphoma

**Mature T and NK neoplasms:**

Systemic EBV+ T cell lymphoma of childhood<sup>b</sup>  
 Hydroa vacciniforme-like lymphoproliferative disorder<sup>b</sup>  
 Adult T cell leukemia/lymphoma  
 Extranodal NK/T cell lymphoma, nasal type  
*Enteropathy-associated T cell lymphoma*  
*Monomorphic epitheliotropic intestinal T cell lymphoma*<sup>b</sup>  
*Indolent T cell lymphoproliferative disorder of the GI tract*<sup>a,b</sup>  
 Hepatosplenic T cell lymphoma  
 Subcutaneous panniculitis-like T cell lymphoma  
 Mycosis fungoides  
 Sezary syndrome  
 Primary cutaneous CD30+ T cell lymphoproliferative disorders  
   Lymphomatoid papulosis  
   Primary cutaneous anaplastic large cell lymphoma  
 Primary cutaneous  $\gamma\delta$  T cell lymphoma  
 Primary cutaneous CD8+ aggressive epidermotropic cytotoxic T cell lymphoma<sup>a</sup>  
*Primary cutaneous acral CD8+ T cell lymphoma*<sup>a,b</sup>  
 Primary cutaneous CD4+ small/medium T cell lymphoproliferative disorder<sup>a,b</sup>  
*Peripheral T cell lymphoma, NOS*  
 Angioimmunoblastic T cell lymphoma  
*Follicular T cell lymphoma*<sup>a,b</sup>  
*Nodal peripheral T cell lymphoma with TFH phenotype*<sup>a,b</sup>  
*Anaplastic large cell lymphoma, ALK+*  
*Anaplastic large cell lymphoma, ALK<sup>-</sup>*<sup>b</sup>  
*Breast implant-associated anaplastic large cell lymphoma*<sup>a,b</sup>

**1. Clasificación Ann-Arbor**

| Tabla 1. Estadios de los linfomas. Clasificación de Ann-Arbor                                                                                                                                                               |   |                                                                                                                                                                                                                 |
|-----------------------------------------------------------------------------------------------------------------------------------------------------------------------------------------------------------------------------|---|-----------------------------------------------------------------------------------------------------------------------------------------------------------------------------------------------------------------|
| I. Una región ganglionar o zona extralinfática (IE)                                                                                                                                                                         | + | A. Asintomático<br>B. Síntomas B: fiebre (> 38 °C), sudoración nocturna, pérdida de peso (> 10 %) en los últimos 6 meses<br>X. Masa mayor de 10 cm o ensanchamiento del mediastino mayor de un tercio del tórax |
| II. Dos o más grupos ganglionares al mismo lado del diafragma o afectación de un órgano extraganglionar y una región ganglionar a un lado del diafragma (IIIE)                                                              |   |                                                                                                                                                                                                                 |
| III. A ambos lados del diafragma, puede acompañarse del bazo (IIIS), un órgano extraganglionar (IIIE) o ambos (IIISE)<br>III1 . Hilio esplénico, ganglios celiacos o potales<br>III2. Paraaórticos, iliacos y mesentéricos. |   |                                                                                                                                                                                                                 |
| IV. Difusa o diseminada de uno o más órganos extraganglionares con o sin diseminación ganglionar                                                                                                                            |   |                                                                                                                                                                                                                 |

**2. Clasificación grados linfomas****1- Bajo grado- indolentes:**

- Linfoma folicular (FL) (grado I-IIIa)
- Linfoma linfocítico de células pequeña tipo LLC (SLL).
- Linfoma de la zona marginal (MZL):  
Extranodal (MALT linfoma)  
Nodal

## Esplénico

- Micosis Fungoide (linfoma T cutáneo)

2- Grado intermedio- agresivos:

- Linfoma difuso de células grandes B (todas las variedades de LDCGB)
- Linfoma folicular (grado IIIb)
- Linfoma de células del manto (MCL)
- Linfomas de células T periférico: No específico (PTCLnos), Angioinmunobástico, Linfoma NK..
- Linfoma anaplásico células grandes.

3- Alto grado- altamente agresivo:

- Linfoma linfoblástico
- Linfoma de Burkitt

## 3. FLIPI

- Edad  $\geq 60$  años
- Estadio III-IV
- Hb  $< 12$  gr/dL
- Nº áreas ganglionares  $\geq 5$
- LDH elevada

| Nº factores | Riesgo            | SG 5 años (%) | SG 10 años (%) |
|-------------|-------------------|---------------|----------------|
| 0-1         | Bajo riesgo       | 90            | 70,7           |
| 2           | Riesgo intermedio | 77,6          | 51             |
| $\geq 3$    | Riesgo elevado    | 52,5          | 35,5           |

## 4. Síndrome de hiperviscosidad linfoma linfoplasmocítico:

Clínica: Sangrado, visión borrosa, alteraciones neurológicas..)

Tratamiento: Plasmaféresis urgente y evitar transfusiones. Realizar plasmaféresis **ANTES** que cualquier tratamiento de quimioterapia.

## 5. Estadificación LBCDG

- **IPI: Índice Pronóstico Internacional LNH agresivos** (*N Engl J Med* 1993;329:987)
  - Edad  $> 60$  años
  - Estadio III-IV
  - ECOG  $\geq 2$
  - Nº local. extraganglionares  $>1$
  - LDH elevada

| Nº de factores | Riesgo                 | SG 5 años (%) |
|----------------|------------------------|---------------|
| 0-1            | Bajo riesgo            | 73            |
| 2              | Riesgo intermedio-bajo | 51            |
| 3              | Riesgo intermedio-alto | 43            |
| 4-5            | Riesgo alto            | 26            |

- **aalPI: Índice Pronóstico Internacional ajustado por Edad (< 60 años)**

- Estadio III-IV
- ECOG  $\geq 2$
- LDH elevada

| Nº de factores | Riesgo                 | SG 5 años (%) |
|----------------|------------------------|---------------|
| 0              | Bajo riesgo            | 83            |
| 1              | Riesgo intermedio-bajo | 69            |
| 2              | Riesgo intermedio-alto | 46            |
| 3              | Riesgo alto            | 32            |

## 6. Estadificación del riesgo LINFOMA LINFOCÍTICO DE CÉLULA PEQUEÑA

| Stage             | Definition                                                                                               | Median survival |
|-------------------|----------------------------------------------------------------------------------------------------------|-----------------|
| Binet system      |                                                                                                          |                 |
| Binet A           | Hb $\geq 10.0$ g/dl, thrombocytes $\geq 100 \times 10^9/l$ ,<br>$<3$ lymph node regions                  | $>10$ years     |
| Binet B           | Hb $\geq 10.0$ g/dl, thrombocytes $\geq 100 \times 10^9/l$ ,<br>$\geq 3$ lymph node regions              | $>8$ years      |
| Binet C           | Hb $< 10.0$ g/dl, thrombocytes $< 100 \times 10^9/l$                                                     | 6.5 years       |
| Rai system        |                                                                                                          |                 |
| Low risk          |                                                                                                          |                 |
| Rai 0             | Lymphocytosis $> 15 \times 10^9/l$                                                                       | $>10$ years     |
| Intermediate risk |                                                                                                          |                 |
| Rai I             | Lymphocytosis and lymphadenopathy                                                                        | $>8$ years      |
| Rai II            | Lymphocytosis and hepatomegaly and/<br>or splenomegaly with/without<br>lymphadenopathy                   |                 |
| High risk         |                                                                                                          |                 |
| Rai III           | Lymphocytosis and Hb $< 11.0$ g/dl<br>with/without lymphadenopathy/<br>organomegaly                      | 6.5 years       |
| Rai IV            | Lymphocytosis and thrombocytes<br>$< 100 \times 10^9/l$<br>with/without lymphadenopathy/<br>organomegaly |                 |



## 7. Hyper-CVAD/MTX-ARA-C +/- RITUXIMAB Y TRATAMIENTO DE SOPORTE LINFOMA DE MANTO.

| Ciclos 1, 3, 5 y 7 (± Rituximab el día 1) |                                  |            |
|-------------------------------------------|----------------------------------|------------|
| - Ciclofosfamida                          | 600 mg/m <sup>2</sup>            | d 1-3      |
| - Adriamicina                             | 50 mg/m <sup>2</sup>             | d 3        |
| - Vincristina                             | 1,4 mg/m <sup>2</sup> (máx 2 mg) | d 3 y 10   |
| - Dexametasona                            | 40 mg iv/vo                      | d 1-3 y 10 |
| - Neulasta                                | 6 microgr s.c                    | d 5        |

| Ciclos 2, 4, 6 y 8 (± Rituximab el día 0) |                                                                                                                                                                                                                                                                                                                                                                                                                                                                                                                                                                                                                                                          |        |
|-------------------------------------------|----------------------------------------------------------------------------------------------------------------------------------------------------------------------------------------------------------------------------------------------------------------------------------------------------------------------------------------------------------------------------------------------------------------------------------------------------------------------------------------------------------------------------------------------------------------------------------------------------------------------------------------------------------|--------|
| Methotrexate                              | 200 mg/m <sup>2</sup> iv en 2h → 800 mg/m <sup>2</sup> en IC 22 h                                                                                                                                                                                                                                                                                                                                                                                                                                                                                                                                                                                        | d1     |
| ARA-C                                     | 3 g/m <sup>2</sup> iv c/12 horas x 4 dosis (tras fin de Mtx)                                                                                                                                                                                                                                                                                                                                                                                                                                                                                                                                                                                             | d2 y 3 |
|                                           | La dosis de ARA-C se reducirá a 1 g/m <sup>2</sup> en:<br>> 60 años, creat > 1,5 ó nivel Mtx >20 µM tras fin de la infusión de Methotrexate (nivel 0)                                                                                                                                                                                                                                                                                                                                                                                                                                                                                                    |        |
| Medidas de soporte                        | - <b>Hidratación alcalina</b> para asegurar una diuresis > 100 ml/h hasta que los niveles de Mtx sean < 0.1 µM<br>- <b>Niveles de Mtx</b> tras fin de la infusión en una vía distante a la misma (nivel 0) y a las 24 y 48 horas (fin de monitorización cuando el nivel sea < 0.1 µM)<br>- <b>Isovorin</b> 25 mg iv a las 12h de finalizada la infusión de MTX. Continuar con 7.5 mg c/6h vo x 8 dosis. Si los niveles son >20 µM (nivel 0), 1 µM (24h) ó 0.1 µM (48h) se aumentará a 25 mg iv c/6h.<br>- <b>Colirio de dexta</b> 2 gotas c/8h en cada ojo x 7 días<br>- <b>Neulasta</b> 6 mg sc el d5 (siempre que el último nivel de MTX sea < 0.1 µM) |        |
| Antibioterapia de soporte                 | - Fluconazol: 200 mg/día vo<br>- Aciclovir: 200 mg/12 horas vo<br>- Ciprofloxacino: 500 mg/12 vo (sólo en ciclos pares)                                                                                                                                                                                                                                                                                                                                                                                                                                                                                                                                  |        |

-Se valorará RTE complementaria (36 Gy en 18 fracciones de 2 Gy) sobre áreas bulky al diagnóstico.

## APÉNDICE ESQUEMAS DE QUIMIOTERAPIA

| ESQUEMA   | Fármacos                          | Dosis                         | Vía | Día  | Cadencia |
|-----------|-----------------------------------|-------------------------------|-----|------|----------|
| R-CHOP/14 | Rituximab                         | 375 mg/m <sup>2</sup>         | i.v | d1   | c/2 sem  |
|           | seguido a la hora de finalizar de |                               |     |      |          |
|           | Ciclofosfamida                    | 750 mg /m <sup>2</sup>        | i.v | d1   |          |
|           | Adriamicina                       | 50 mg /m <sup>2</sup>         | i.v | d1   |          |
|           | Vincristina                       | 1,4 mg/m <sup>2</sup> (máx 2) | i.v | d1   |          |
|           | Prednisona                        | 100 mg                        | v.o | d1-5 |          |
|           | G-CSF                             | 300/480 mcg<br>( < ó > 75 Kg) | s.c | d4-8 |          |
| R ± CVP   | Ciclofosfamida                    | 750-1000 mg / m <sup>2</sup>  | i.v | d1   | c/3 sem  |
|           | Vincristina                       | 1,4 mg/m <sup>2</sup> (máx 2) | i.v | d1   |          |
|           | Prednisona                        | 100 mg                        | v.o | d1-5 |          |
| R ± GPD   | Dexametasona                      | 40 mg                         | i.v | d1-4 | c/3 sem  |

|                                 |                                                                          |                                                      |                                                                             |                        |                 |
|---------------------------------|--------------------------------------------------------------------------|------------------------------------------------------|-----------------------------------------------------------------------------|------------------------|-----------------|
|                                 | Gemcitabina                                                              | 1250 mg/m <sup>2</sup>                               | i.v                                                                         | d1 y 8                 |                 |
|                                 | Cisplatino                                                               | 75 mg/m <sup>2</sup>                                 |                                                                             | d1                     |                 |
| FLUDARABINA                     | Fludarabina                                                              | 25 mg/m <sup>2</sup>                                 | i.v                                                                         | d1-5                   | c/21-28 d       |
| ETOPOSIDO                       | Etopósido                                                                | 100 mg dosis total                                   | v.o                                                                         | d1-14                  | c/21-28 d       |
| R ± MINE<br>(pre-TASP)          | Mesna                                                                    | 1,66 gr/m <sup>2</sup> con la IF                     | i.v                                                                         | d1-3                   | c/3 sem         |
|                                 | Mesna                                                                    | 500 mg a las 4 y 8 h de la ifosfamida.               | v.o                                                                         | d1-3                   |                 |
|                                 | Ifosfamida                                                               | 1,66 gr/m <sup>2</sup>                               | i.v                                                                         | d1-3                   |                 |
|                                 | Mitoxantrone                                                             | 8 mg/m <sup>2</sup>                                  | i.v                                                                         | d1                     |                 |
|                                 | Etopósido                                                                | 80 mg/m <sup>2</sup>                                 | i.v                                                                         | d1-3                   |                 |
| R ± MINE<br>paliativo           | Mesna                                                                    | 1,33 gr/m <sup>2</sup> con la IF                     | i.v                                                                         | d1-3                   | c/3 sem         |
|                                 | Mesna                                                                    | 500 mg a las 4 y 8 h de la ifosfamida.               | v.o                                                                         | d1-3                   |                 |
|                                 | Ifosfamida                                                               | 1,33 gr/m <sup>2</sup>                               | i.v                                                                         | d1-3                   |                 |
|                                 | Mitoxantrone                                                             | 8 mg/m <sup>2</sup>                                  | i.v                                                                         | d1                     |                 |
|                                 | Etopósido                                                                | 65 mg/m <sup>2</sup>                                 | i.v                                                                         | d1-3                   |                 |
| R ± FC                          | Rituximab                                                                | 375 mg/m <sup>2</sup>                                | i.v                                                                         | d1                     | c/4 sem         |
|                                 | Ciclofosfamida                                                           | 250 mg/m <sup>2</sup>                                | i.v                                                                         | d2-4                   |                 |
|                                 | Fludarabina                                                              | 25 mg/m <sup>2</sup>                                 | i.v                                                                         | d2-4                   |                 |
| Ciclofosfamida Oral (paliativo) | Ciclofosfamida                                                           | 100 mg                                               | v.o                                                                         | d 1-28                 | c/6 sem x 1 año |
| Beneflur                        | Fludarabina                                                              | 40 mg/m <sup>2</sup>                                 | v.o                                                                         | d1-3                   | c/4 sem         |
| R ± FCM                         | Rituximab                                                                | 375 mg/m <sup>2</sup>                                | i.v                                                                         | d1                     | c/4 sem         |
|                                 | Fludarabina                                                              | 25 mg/m <sup>2</sup>                                 | i.v                                                                         | d2-4                   |                 |
|                                 | Ciclofosfamida                                                           | 200 mg/m <sup>2</sup>                                | i.v                                                                         | d2-4                   |                 |
|                                 | Mitoxantrone                                                             | 8 mg/m <sup>2</sup>                                  | i.v                                                                         | d2                     |                 |
| R2                              | Rituximab                                                                | 375 mg/m <sup>2</sup>                                | i.v                                                                         | D1                     | c/4 sem         |
|                                 | Lenalidomida                                                             | 20 mg                                                | V.O                                                                         | D2-22                  |                 |
| RITUXIMAB                       | Rituximab                                                                | Inducción:<br>375 mg/m <sup>2</sup> /sem x 4 semanas | Mantenimiento: Si RC/RP: 1 dosis (375 mg/m <sup>2</sup> )<br>c/3 m x 2 años |                        |                 |
| G-Bendamustina inducción        | Obinutuzumab                                                             | 1000 mg                                              | i.v                                                                         | C1d1, 8 y 15<br>C2-6d1 | c/4 sem         |
|                                 | Bendamustina                                                             | 90 mg/m2                                             | i.v                                                                         | d1 y 2                 |                 |
| G mantenimiento                 | Obinutuzumab                                                             | 1000 mg                                              | i.v                                                                         | c/2 m x 2 años         |                 |
| R-Bendamustina                  | Rituximab                                                                | 375 mg/m <sup>2</sup>                                | i.v                                                                         | d1                     | c/4 sem         |
|                                 | Bendamustina                                                             | 90 mg/m <sup>2</sup>                                 | i.v                                                                         | d1 y 2                 |                 |
|                                 | En el caso de LNH linfocíticos: <b>Bendamustina</b> 70 mg/m <sup>2</sup> |                                                      |                                                                             |                        |                 |
| R-Zevalín                       | Rituximab                                                                | 250 mg/m <sup>2</sup>                                | i.v                                                                         | d1 y 8                 | única           |
|                                 | Zevalín                                                                  | 0,3-0,4 mCi/kg                                       | i.v                                                                         | d8                     |                 |
| R-BAC500                        | Rituximab                                                                | 375 mg/m2                                            | i.v                                                                         | d1                     | c/4 sem x 4-6   |
|                                 | Bendamustina                                                             | 70 mg/m2                                             |                                                                             | d2 y 3                 |                 |
|                                 | AraC                                                                     | 500 mg/m2                                            |                                                                             | d2-4                   |                 |
| Velcade                         | Velcade                                                                  | 1,3 mg/m <sup>2</sup>                                | i.v bolus                                                                   | d 1,4, 8 y 11          | c/3 sem         |

**TRATAMIENTO CON HDMTX:**

- No deben existir colecciones líquidas (derrame pleural,...)
- No antibióticos, AINEs, ...
- Buen nivel de proteínas.
- No ingerir ácidos (coca cola, zumos, yogures, queso,...)
- 3000-4000 mL + CIK cada 24 horas.
- $\text{HCO}_3^-$  1/6M, 250 cc cada 6-8 horas.
- Control pH urinario en cada micción. Si pH >7.5 en 2 tomas sucesivas se puede iniciar Methotrexate.
- Si tras 12h de alcalinización el pH  $\leq$ 7.5 iniciar Acetazolamida (Edemox®) 1 comp. c/8h y mantener hasta 24 horas tras el Methotrexate.
- Si el pH >8 en varias micciones disminuir  $\text{HCO}_3^-$
- METHOTREXATE en infusión de 6 horas por diferente vía a hidratación.
- LEUCOVORIN 15 mg/m<sup>2</sup> c/6h x 12 dosis iniciando a las 8 horas del fin del Methotrexate.
- Niveles MTX: -
  - A las 24 horas: < **10**
  - A las 48 horas: < **1**
  - A las 72 horas: < 0.1. ALTA
- Control fx renal diaria. Si empeora >50% incrementar LV a 100 mg c/6

## Linfoma de Hodgkin

### I. ESTUDIO DE EXTENSIÓN:

Anamnesis y exploración física completa.

- Hemograma completo con VSG.
- Bioquímica con función renal, hepática, calcemia y LDH.
- Proteinograma y cuantificación de inmunoglobulinas.
- Serología de hepatitis B, C y HIV.
- Radiografía de tórax PA y L.
- PET/TAC en todos los estadios.
- Ecocardiografía con FEVI y PFR con difusión de CO en estadios I y II y en pacientes con antecedentes de patología cardiorrespiratoria.

Ofrecer en todos los pacientes que deseen descendencia la posibilidad de criopreservar semen u ovocitos. En mujeres candidatas a ABVD y menos de 35 años, comentar con la paciente la posibilidad de inicio inmediato de tratamiento (riesgo de esterilidad menor del 5%).

### II. ESTADIFICACION:

Clasificación de Ann Arbor modificada en Cotswolds. (Ver apéndice).

### III. PRONÓSTICO:

Estadios iniciales → criterios del GHSG (German Hodgkin Study Group)

Estadios avanzados → IPS (Ver apéndice).

### IV. TRATAMIENTO:

Se realizará un PET a la finalización del tratamiento a todos los pacientes no antes de las 4-6 semanas tras el último ciclo de quimioterapia (recomendable 6 semanas) y no antes de las 8 semanas (recomendable 12 semanas) tras la radioterapia.

#### **IV.1.-Estadios iniciales (estadio I y II):**

– Buen pronóstico según criterios GHSG:

Dos ciclos de ABVD seguido de PET interino el día 25 del segundo ciclo\* Ver nota:

Deauville 1-3 → ABVD x 1 más

Deauville 4 → ABVD x 2 + RT (30 Gy)

Deauville 5 → 2 ciclos BEACOPPesc (a tener en cuenta toxicidad, esterilidad) (Estudio H10. J Clin Oncol. 2017 Jun 1;35(16):1786-1794) más RT 30 Gy sobre áreas afectadas.

En caso de Deauville 5 por lesiones nuevas confirmadas: ICE seguido QAD +TASPE + RT 30 Gy sobre áreas afectadas.

En todos los casos se realizará PET/TC a la finalización del tratamiento para comprobar la remisión metabólica (a los 3 meses tras radioterapia y a las 6 semanas tras quimioterapia exclusiva).

\* NOTA: a todos los pacientes se le ofrecerá la posibilidad de ser tratados con dos ciclos de ABVD seguido de RTIF 20 Gy (probabilidad de control de la enfermedad con el primer tratamiento 5% superior, pero mayor riesgo de morbilidad tardía grave y/o compromiso de la supervivencia global a largo plazo superior a la opción ofrecida en este protocolo). En caso de decidir tratamiento combinado, no es necesaria la realización de PET/TC interino (los pacientes serán directamente remitidos a Oncología Radioterápica para iniciar irradiación a las 3-4 semanas tras la última dosis de quimioterapia).

– Mal pronóstico según criterios GHSG:

Opción estándar (Grado A):

Dos ciclos de ABVD seguido de PET interino el día 25 del segundo ciclo.

Deauville 1-3 → ABVD x 4 más

Deauville 4-5 → 2 ciclos BEACOPPesc (a tener en cuenta toxicidad, esterilidad) (Estudio H10. J Clin Oncol. 2017 Jun 1;35(16):1786-1794) más RT 30 Gy sobre áreas afectadas.

En caso de Deauville 5 por lesiones nuevas confirmadas: ICE seguido QAD +TASPE + RT 30 Gy sobre áreas afectadas.

En todos los casos se realizará PET/TC a la finalización del tratamiento para comprobar la remisión metabólica (a los 3 meses tras radioterapia y a las 6 semanas tras quimioterapia exclusiva)

NOTA: a todos los pacientes se le ofrecerá la posibilidad de ser tratados con cuatro ciclos de ABVD seguido de RTIF 30 Gy (probabilidad de control de la enfermedad con el primer tratamiento 5% superior, pero mayor riesgo de morbilidad tardía grave y/o compromiso de la supervivencia global a largo plazo superior a la opción ofrecida en este protocolo). En caso de decidir tratamiento combinado, no es necesaria la realización de PET/TC interino, aunque se realizará un TC o PET/TC antes de la irradiación.

## IV.2. Estadíos III y IV:

Opción prioritaria:

ABVD x 2 seguido de PET interino el día 25-27 del segundo ciclo:

Deauville 1-3: AVD x 4 (se omite bleomicina).

Deauville 4-5: escBEACOPP x 4.

En caso de Deauville 5 por lesiones nuevas confirmadas: ICE seguido QAD +TASPE + RT 30 Gy sobre áreas afectadas.

Pacientes con cardiopatía o enfermedad pulmonar crónica que contraindique ABVD:

- C-MOPP x 6 ciclos

Radioterapia complementaria sobre área afecta en caso de masa residual PET positiva. (30 Gy en 18 fracciones de 2 Gy).

En todos los casos se realizará PET/TC a la finalización del tratamiento para comprobar la remisión metabólica (a los 3 meses tras radioterapia y a las 6 semanas tras quimioterapia exclusiva)

### IV.3. Variedad Predominio Linfocítico:

Estadios I-II → Radioterapia sobre campo afecto (Excepciones: Mediastino ó axila en Mujeres < 30 años).

Resto igual que variante clásica valorado la adición de Rituximab en estadios III y IV.

### IV.4. Pacientes Refractarios o en Recaída:

A. Recaída tras Radioterapia: ABVD o C-MOPP con la misma sistemática que los pacientes tratados de “novo”.

B. Recaída tras QT con intervalo libre < 1 año:

- Paciente candidato a QAD:

- GPD x 3-6 ciclos - QAD + TACPH. Brentuximab vedotin 1.8 mg/kg c/3 sem x 8-16 ciclos en pacientes PET positivos pre QAD (Estudio AETHERA. Lancet. 2015;385(9980):1853-62) o en pacientes con 3 o más de los siguientes factores de riesgo presentes en el momento de la recaída: 1.- Recaída < 12 meses o refractario; 2.- RP o EE previo a TACPH; 3.- Enfermedad extranodal; 4.- Síntomas B; 5.- ≥ 2 líneas de QT de rescate preTASPE.
- Si refractariedad a ABVD (progresión durante ABVD o en los 3 primeros meses tras su finalización): ICE x 3-6 ciclos - QAD + TACPH. Brentuximab vedotin 1.8 mg/kg c/3 sem x 8-16 ciclos en pacientes PET positivos pre QAD (Estudio AETHERA. Lancet. 2015;385(9980):1853-62) o en pacientes con 3 o más de los siguientes factores de riesgo presentes en el momento de la recaída: 1.- Recaída < 12 meses o refractario; 2.- RP o EE previo a TACPH; 3.- Enfermedad extranodal; 4.- Síntomas B; 5.- ≥ 2 líneas de QT de rescate preTASPE.

- Paciente no candidato a QAD:

- ECOG 0-2: GPD x 6 ciclos +/- RTE sobre masas residuales o bulky
- ECOG 3-4: Tratamiento paliativo (ver apartado)

C. Recaída tras QT exclusiva con intervalo libre > 1 año:

- Pacientes con recaídas de estadios iniciales en un sólo área supradiagráfica, no Bulky, no síntomas B, VSG < 60 y LDH, B2-microglobulina y PET negativo fuera del área de recidiva: Radioterapia Mantle (intentando evitar área cardíaca y parahilar en pacientes que han recibido ABVD).
- Pacientes candidatos a QAD y < 50 años: GPD x 3-6 ciclos - QAD – TASPE. En pacientes con enfermedad extraganglionar en el momento de la recidiva se valorará la administración de brentuximab vedotin de consolidación con los mismos criterios del apartado anterior.
- Pacientes no incluíbles en los grupos anteriores: Quimioterapia x 6-8 ciclos (ABVD o BEACOPP21 sin adriamicina según el régimen usado al diagnóstico) +/- Radioterapia sobre masas residuales o Bulky.

### V. SEGUNDAS RECAÍDAS Y POSTERIORES:

Tratamiento individualizado.

#### V.1.- Recaída tras TACPH o progresión tras dos líneas de quimioterapia y ECOG 0-2:

Brentuximab vedotin (BV) 1.8 mg/kg cada 3 semanas. Se remitirá a la unidad de trasplante alogénico del Hospital Regional desde la administración del primer ciclo y se realizará PET/TC después del cuarto ciclo:

- Respuesta completa: seguir brentuximab hasta ciclo 8 y repetir PET/TC. Si se confirma RC se continuará BV hasta 16 ciclos o intolerancia.
- Respuesta parcial tras el 4º ciclo o no confirmación de RC tras el 8º: Si existe donante para trasplante alogénico (y no existe contraindicación por otra causa), se realizará dicho trasplante con preferencia por la variedad haploidéntica.

## V.2. Sigüientes recaídas:

ECOG 0-1 y no contraindicación para antiPD-1:

Nivolumab 3 mg/kg cada 2 semanas, con evaluación de respuesta cada 4 dosis. En pacientes que alcancen respuesta parcial o completa se valorará la posibilidad de consolidación con trasplante alogénico (preferentemente haploidéntico).

Resto de situaciones:

Ver tratamiento paliativo.

## VI. TRATAMIENTO PALIATIVO:

Tratamiento secuencial individualizado según características clínicas del paciente:

- MINE cada 3 semanas.
- GVD (gemcitabina, vinblastina, capecitabina).
- Quimioterapia metronómica.
- Bendamustina.
- Everolimus (uso off label).
- Vinblastina en monoterapia.
- Radioterapia sobre áreas afectadas.

## VII. SEGUIMIENTO:

### VII.1. Pacientes con PET/TC con Deauville score 1-2 al finalizar primera línea:

- 1º- 4º año: Cada 6 meses (anual a partir del 5º año):
  - Anamnesis y exploración física.
  - Analítica general con VSG y LDH. Si irradiación del área cervical solicitar perfil tiroideo.
  - Radiografía tórax (PA y lateral) y ecografía abdominal y pélvica anual.
  - Ecografía/mamografía (o RM mamaria bilateral) a los 10 años de la RT (screening de cáncer de mama) si irradiación de tórax o axilas en mujeres.
  - Ecocardiograma a los 5 (en todos los pacientes que han recibido adriamicina  $\geq 300$  mg/m<sup>2</sup>) y 10 años de la RT si irradiación de tórax.

### VII.2. Pacientes con DS 3-4 tras finalizar primera línea o pacientes que alcanzan la RC tras segunda línea o posterior

- 1º- 3º año: Cada 3 meses el primer y segundo año (cada 6 el tercer año)
  - Anamnesis y exploración física.
  - Analítica general con VSG y LDH. Si irradiación del área cervical solicitar perfil tiroideo.

- TAC toracoabdominopelvico cada 6 meses.
- 4º y 5º año: Cada 6 meses (anual a partir del 6º año):
  - Anamnesis y exploración física.
  - Analítica general con VSG y LDH. Si irradiación del área cervical solicitar perfil tiroideo.
  - Ecografía/mamografía a los 10 años de la RT (screening de cáncer de mama) si irradiación de tórax en mujeres.
  - Ecocardiograma a los 5 (en todos los pacientes que han recibido adriamicina  $\geq 300$  mg/m<sup>2</sup>) y 10 años de la RT si irradiación de tórax.

Todos los pacientes que hayan recibido RT sobre medistino o cuello recibirán asesoramiento sobre factores de riesgo cardiovasculares y su prevención.

### **VII.3. Pacientes con enfermedad activa o PET/TC con Deauville Score 5 (en el último control):**

- Anamnesis y exploración física.
- Analítica general con VSG y LDH. Si irradiación del área cervical solicitar perfil tiroideo.
- TAC toracoabdominopelvico o PET/TC cada 3 meses.

Hasta cumplir los requisitos de los apartados 1 o 2.



## APÉNDICE-LINFOMA DE HODGKIN

### Clasificación Ann Arbor

Para la **estadificación** se utiliza la Clasificación de Ann Arbor modificada de Cotswolds (1) (Tabla 1).

| Tabla 1. Principios para la estadificación del linfoma de Hodgkin                                                                                                                                                           |   |                                                                                                                            |
|-----------------------------------------------------------------------------------------------------------------------------------------------------------------------------------------------------------------------------|---|----------------------------------------------------------------------------------------------------------------------------|
| I. Una región ganglionar o zona extralinfática (IE).                                                                                                                                                                        | + | A. Asintomático                                                                                                            |
| II. Dos o más grupos ganglionares al mismo lado del diafragma o afectación de un órgano extraganglionar y una región ganglionar a un lado del diafragma (IIIE)                                                              |   | B. Síntomas B: fiebre ( $> 38^{\circ}\text{C}$ ), sudoración nocturna, pérdida de peso ( $> 10\%$ ) en los últimos 6 meses |
| III. A ambos lados del diafragma, puede acompañarse del bazo (IIIS), un órgano extraganglionar (IIIE) o ambos (IIISE)<br>III1: hilio esplénico, ganglios celiacos o potales.<br>III2: paraaórticos, iliacos y mesentéricos. |   | X. Masa mayor de 10 cm o ensanchamiento del mediastino mayor de un tercio del tórax                                        |
| IV. Difusa o diseminada de uno o más órganos extraganglionares con o sin diseminación ganglionar                                                                                                                            |   |                                                                                                                            |
|                                                                                                                                                                                                                             |   |                                                                                                                            |

### Criterios pronósticos

GHS (German Hodgkin Study Group):

Se consideran Pronóstico desfavorable presentar, al menos, uno de los siguientes:

|                                                            |
|------------------------------------------------------------|
| Enfermedad de Bulky mediastínica ( $> 1/3$ de ancho tórax) |
| VSG $> 50$ mm 1ª hora                                      |
| VSG $> 30$ mm 1ª hora + Síntomas B                         |
| $> 2$ Áreas Ganglionares afectadas                         |
| Afectación extranodal por extensión directa                |

IPS: (Internacional Prognosis Score for Hodgkin Lymphoma)

Sumará 1 punto cada uno de los siguientes factores:

- Albúmina  $< 4$  g/dl
- Sexo Varón
- Hb  $< 10,5$  g/dl
- $> 45$  años
- Estadio IV
- $> 15.000$  Leucocitos absolutos
- $< 600$  linfocitos absolutos y/o  $< 8\%$  de linfocitos respecto al total del leucos.

| Puntuación | PFS a 5 años | OS a 5 años |
|------------|--------------|-------------|
| 0          | 88%          | 98%         |
| 1          | 84%          | 97%         |
| 2          | 80%          | 91%         |
| 3          | 74%          | 88%         |
| 4          | 67%          | 85%         |
| 5 o +      | 62%          | 67%         |

Calculadora online: [https://www.uptodate.com/contents/calculator-international-prognostic-score-in-hodgkin-lymphoma-2012-update?source=see\\_link](https://www.uptodate.com/contents/calculator-international-prognostic-score-in-hodgkin-lymphoma-2012-update?source=see_link)

## Deauville

| Criterios de Deauville                                          |                                                        |
|-----------------------------------------------------------------|--------------------------------------------------------|
| 1                                                               | Sin captación.                                         |
| 2                                                               | Captación < ó = a mediastino.                          |
| 3                                                               | Captación > mediastino pero ≤ a Hígado.                |
| 4                                                               | Captación > a hígado.                                  |
| 5A                                                              | Aumento marcado respecto a la captación del hígado.    |
| 5B                                                              | Aparición de nuevas lesiones relacionadas con linfoma. |
| Modificación NCCN: 5A: Aumento Captación// 5B: Nuevas lesiones. |                                                        |

| ESQUEMA          | FÁRMACOS                         | DOSIS                                | VÍA | DÍAS    | FRECUENCIA    |
|------------------|----------------------------------|--------------------------------------|-----|---------|---------------|
| ABVD             | Adriamicina                      | 25 mg/m <sup>2</sup>                 | i.v | 1 y 14  | c/ 28 días    |
|                  | Bleomicina                       | 10 mg/m <sup>2</sup>                 | i.v | 1 y 14  |               |
|                  | Vinblastina                      | 6 mg/m <sup>2</sup>                  | i.v | 1 y 14  |               |
|                  | DTIC                             | 375 mg/m <sup>2</sup>                | i.v | 1 y 14  |               |
| C-MOPP           | Ciclofosfamida                   | 650 mg/m <sup>2</sup>                | i.v | 1 y 8   | c/ 28 días    |
|                  | Vincristina                      | 1,4 mg/m <sup>2</sup><br>( máx 2 mg) | i.v | 1 y 8   |               |
|                  | Procarbicina                     | 100 mg/m <sup>2</sup>                | v.o | 1 al 14 |               |
|                  | Prednisona                       | 40 mg/m <sup>2</sup>                 | v.o | 1 al 14 |               |
| GPD              | Ver protocolo linfoma no Hodgkin |                                      |     |         |               |
| MINE             | Ver protocolo linfoma no Hodgkin |                                      |     |         |               |
| Metronómica      | Ciclofosfamida                   | 50 mg                                | v.o | diario  | Máximo 2 años |
|                  | Vinblastina                      | 3 mg/m <sup>2</sup>                  | i.v | semanal |               |
|                  | Celecoxib                        | 200 mg/12h                           | v.o | diario  |               |
| BEACOPP escalado | Bleomicina                       | 10 mg/m <sup>2</sup>                 | i.v | d8      |               |
|                  | Etopósido                        | 200 mg/m <sup>2</sup>                | i.v | d1-3    |               |
|                  | Adriamicina                      | 35 mg/m <sup>2</sup>                 | i.v | d1      |               |
|                  | Ciclofosfamida                   | 1200 mg/m <sup>2</sup>               | i.v | d1      |               |
|                  | Vincristina                      | 1,4 mg/m <sup>2</sup>                | i.v | d8      |               |
|                  | Procarbicina                     | 100 mg/m <sup>2</sup>                |     | d1-7    |               |
|                  | Prednisona                       | 40 mg/m <sup>2</sup>                 | v.o | d 1-14  |               |
|                  | Pegfilgrastim                    | 6 mg                                 | sc  | d 9     |               |

## GIST: Tumores del Estroma Gastrointestinal

### I. DIAGNÓSTICO Y ESTADIFICACIÓN

- Anamnesis.
- Exploración física completa.
- Analítica con hemograma, bioquímica (función renal + iones, hepática, LDH, calcio y proteínas totales).
- Ecoendoscopia: Nódulos esofagogástricos o duodenales <2 cm.
- TAC abdominopélvico.
- RM: en caso de tumores pélvicos o metástasis hepáticas.
- PET: Individualizado, casos no concluyentes por TAC, RM.
- Biopsia escisional: Tumores  $\leq 2$ cm
- Extirpación laparoscópica/laparotómica: Nódulo abdominal no susceptible de evaluación endoscópica.
- BAG guiada por TAC: Masa, especialmente si es probable que la cirugía sea una resección multivisceral.

### II. HISTOLOGÍA Y BIOLOGÍA MOLECULAR

El informe anatomopatológico siempre debe incluir:

- Tamaño del tumor.
- % necrosis.
- Nº de mitosis x áreas de 5 mm<sup>2</sup>.
- Distancia entre lesión y margen.
- Integridad del tumor. Presencia de perforación
- En casos de afectación ganglionar especificar ganglios resecados y afectados.

ESTADIFICACIÓN: UICC TNM 8

IMPORTANTE, ANTES DE INICIAR TRATAMIENTO CON IMATINIB:

Realizar estudio mutacional (c-KIT de exones 8, 9, 11, 13 y 17, PDGFR 12, 14 y 18)

- En KIT/PDGFR WT GIST, se realiza inmunohistoquímica para SDHB para identificar GIST deficiente en SDH. Si SDH no deficiente hacer BRAF.
- En el GIST cuádruple negativo (KIT/PDGFR/BRAF/SDH), se debe excluir un síndrome NF1 subyacente no reconocido. Remitir a Unidad de Consejo Genético,

**Table 1. Guidelines for Risk Assessment of Primary Gastrointestinal Stromal Tumor (GIST)**

| Tumor Parameters                  |             | Risk of Progressive Disease <sup>#</sup> (%) |                     |                    |                     |
|-----------------------------------|-------------|----------------------------------------------|---------------------|--------------------|---------------------|
| Mitotic Rate                      | Size        | Gastric                                      | Duodenum            | Jejunum/Ileum      | Rectum              |
| ≤5 per 50 high-power fields (HPF) | ≤2 cm       | None (0%)                                    | None (0%)           | None (0%)          | None (0%)           |
|                                   | >2 - ≤5 cm  | Very low (1.9%)                              | Low (8.3%)          | Low (4.3%)         | Low (8.5%)          |
|                                   | >5 - ≤10 cm | Low (3.6%)                                   | (Insufficient data) | Moderate (24%)     | (Insufficient data) |
|                                   | >10 cm      | Moderate (10%)                               | High (34%)          | High (52%)         | High (57%)          |
| >5 per 50 HPF                     | ≤2 cm       | None <sup>##</sup>                           | (Insufficient data) | High <sup>##</sup> | High (54%)          |
|                                   | >2 - ≤5 cm  | Moderate (16%)                               | High (50%)          | High (73%)         | High (52%)          |
|                                   | >5 - ≤10 cm | High (55%)                                   | (Insufficient data) | High (85%)         | (Insufficient data) |
|                                   | >10 cm      | High (86%)                                   | High (86%)          | High (90%)         | High (71%)          |

<sup>#</sup> Defined as metastasis or tumor-related death.<sup>##</sup> Denotes small number of cases.

Tabla de Riesgo de Miettinen/Joensuu

Además de los referidos en la tabla, se consideran de alto riesgo:

- Los tumores perforados.
- Los tumores de riesgo intermedio con delección del 557-558 del ckit.

**III. TRATAMIENTO:****III.1. ENFERMEDAD LOCALIZADA**

- CIRUGÍA: Si posibilidad de R0 sin secuelas importantes.

(No se recomienda linfadenectomía. Sólo en casos familiares o afectación ganglionar macroscópica)

- NEOADYUVANCIA: No posibilidad de Cirugía R0 sin secuelas importantes.

Análisis mutacional OBLIGATORIO

IMATINIB 400mg/día durante 6-12 meses.

No se utilizará en PDGFR 842V mutados (suspender si se hubiera empezado)

Evaluación de la respuesta temprana del tumor: PET o TAC

Posteriormente CIRUGÍA

Imatinib se puede detener de forma segura algunos días o incluso un día antes de la cirugía y se puede reanudar de inmediato cuando el paciente se recupere de la cirugía.

Dado que en estos casos no se podrán valorar las mitosis por AP tras tratamiento neoadyuvante, se consideran de alto riesgo y completará adyuvancia hasta 3 años (sumando la neoadyuvancia)

- ADYUVANCIA: En GIST de alto riesgo.

IMATINIB 400mg/día durante 3 años.

No se utilizará en PDGFR 842V mutados (suspender si se hubiera empezado).

Si neoadyuvancia previa: Tener en cuenta el periodo de imatinib recibido para completar 3 años.

En tumores wild Type valorar adyuvancia.

No usar adyuvancia en pacientes con NF-1.

La resección R1 no se considera criterio para adyuvancia.

- SEGUIMIENTO: GIST de bajo riesgo e intermedio

### III.2. ENFERMEDAD METASTÁSICA/ IRRESECCABLE

IMATINIB 400 mg/día indefinido hasta progresión.

- Si mutación en el exón 9, aumentar dosis hasta 800 mg/día.
- No se utilizará en PDGFR 842V mutados (suspender si se hubiera empezado).
- Valorar siempre la cirugía (en resecable).
- Si se han resecado las metástasis se usará también Imatinib indefinido

Alertar siempre sobre la importancia del CUMPLIMIENTO TERAPEÚTICO, interacciones con alimentos y medicamentos, así como el manejo de efectos secundarios.

EVALUACIÓN DE LA RESPUESTA: Criterios CHOI

La evaluación de la respuesta es compleja, y la progresión temprana, debe ser confirmada por un equipo experimentado.

(Un aumento en el tamaño del tumor puede ser indicativo de la respuesta del tumor si la densidad disminuye).

(Patrón típico de progresión es el "nódulo dentro de la masa").

Si PROGRESIÓN valorar:

- Imatinib 600 - 800mg/día.

SI INTOLERANCIA O NUEVA PROGRESIÓN valorar:

- Sunitinib 37.5mg/día continuo (ESMO MCBS 3)

Vigilancia estrecha: hipertensión, función cardíaca y hormonas tiroideas.

SI PROGRESIÓN valorar:

- Regorafenib 160 mg/día x 3 semanas cada 4 semanas (ESMO MCBS 3)
- Valorar re-tratamiento con imatinib.
- En caso de progresión lenta, valorar continuar con TKIs, si el paciente está asintomático y mantiene su estado general.
- Si progresión en localización única tratar esa lesión con tratamiento local

(cirugía/radiofrecuencia) manteniendo con el mismo esquema de tratamiento.

## SEGUIMIENTO

|                   |                                                                                                                                                                                                                                                                                                                                                                                                                                     |
|-------------------|-------------------------------------------------------------------------------------------------------------------------------------------------------------------------------------------------------------------------------------------------------------------------------------------------------------------------------------------------------------------------------------------------------------------------------------|
| Muy bajo Riesgo   | Seguimiento rutinario no indicado                                                                                                                                                                                                                                                                                                                                                                                                   |
| Bajo riesgo       | Analítica y TC abdominopélvico o RMN cada 12 meses durante 5 años                                                                                                                                                                                                                                                                                                                                                                   |
| Riesgo intermedio | Analítica y TC abdominopélvico cada 6 meses x 3 años y cada 12 meses hasta 5 años                                                                                                                                                                                                                                                                                                                                                   |
| Alto riesgo       | <p>Analítica y TC abdominopélvico cada 6 meses durante 3 años de imatinib adyuvante.</p> <p>Analítica cada 3 meses durante Imatinib adyuvante.</p> <p>Analítica y TC abdominopélvico cada 3-4 meses dos años tras STOP imatinib adyuvante.</p> <p>A partir de los 5 años de cirugía:</p> <ul style="list-style-type: none"> <li>- Analítica y TC abdominopélvico cada 6-12 meses hasta completar 10 años (total 13 años)</li> </ul> |

Endoscopia solo indicada en GIST familiares y en algunos casos de resecciones R1 en tumores gástricos, esofágicos o rectales.

## Sarcoma de partes blandas

(Excluyendo Sarcoma de Ewing, Rabdomiosarcoma y PNET)

### I. DIAGNÓSTICO Y ESTADIFICACIÓN:

Siempre: Presentación en **comité de sarcomas**.

#### **I.1 PRECIRUGÍA:**

- Anamnesis.
- Exploración física completa.
- Analítica con hemograma, bioquímica (función renal + iones, hepática, LDH, calcio y proteínas totales).
- TAC tórax.
- RM de localización del tumor primario (método de elección, debe realizarse antes de la biopsia). Se recomienda incluir en su informe:
  - Tamaño.
  - Localización (superficial o profundo; compartimental o extracompartimental).
  - Límites anatómicos.
  - Relación con estructuras neurovasculares.
  - Extensión del edema perilesional.
  - Patrón de realce del contraste.
  - Sugerir áreas para biopsia.
- TAC abdominal: En sarcomas retroperitoneales, sarcomas de alto grado, liposarcoma mixoide, sarcoma epiteliode, angiosarcoma y leiomiosarcoma.
- Evaluación de ganglios regionales con TAC en: Sarcomas epiteliode, sarcoma de células claras.
- TAC cerebral: Sarcoma alveolar, sarcoma de células claras, angiosarcoma.
- PET-TAC: En casos individualizados de recidiva local donde se ha considerado cirugía, así como para descartar malignización de neurofibromas en neurofibromatosis tipo 1.
- Ecocardiograma o FEVI por MUGA: Se recomienda en pacientes que vayan a recibir antraciclinas.
- Biopsia con aguja gruesa guiada por radiología o biopsia incisional como alternativa (cuando la BAG no es posible).

#### **I.2. POSTCIRUGÍA**

Debe figurar en el informe de Anatomía Patológica:

- Procedimiento quirúrgico.
- Ubicación.
- Tipo histológico.

- Grado histológico (a excepción de algún sarcoma específico donde la agresividad se define por el tipo histológico en sí)
- Márgenes.
- Invasión de estructuras adyacentes.
- Profundidad del tumor (en relación con la fascia superficial)
- Inmunohistoquímica. Debe complementarse con patología molecular especialmente cuando:
  - El diagnóstico patológico específico es dudoso;
  - La presentación patológica clínica es inusual; y
  - Puede tener relevancia pronóstica y / o predictiva.
- Porcentaje de necrosis (si el tratamiento preoperatorio es administrado).

**ESTADIFICACIÓN:** Se utilizará el STS UICC TNM 8 staging system.

## **II. TRATAMIENTO**

### **II.1. Enfermedad locorregional**

**II.1.a. Cirugía:** Tratamiento estándar en STS localizado, debe ser realizado por cirujano especializado. Procedimiento quirúrgico estándar: escisión amplia con márgenes negativos (R0).

En caso de cirugía R1, R2: Reintervención si es posible.

La amputación y/o desarticulación deben ser reservadas sólo cuando:

- La resección completa no es factible.
- Infiltración del haz neurovascular.
- Riesgo de miembro no funcional.

**II.1.b Radioterapia:** Todos los pacientes que son candidatos a cirugía conservadora, incluyendo aquellos en los que se realiza re-escisión, deben ser valorados por Radioterapia. La modalidad de tratamiento (preoperatoria o postoperatoria) **y su integración con la quimioterapia** será discutida en cada caso. Se permitirá la administración de RTQT concomitante así como secuencial.

- Radioterapia preoperatoria: Valorar en sarcomas localmente avanzados no susceptibles de resección quirúrgica con margen amplios debido a cercanía de estructuras críticas como vasos, nervios o huesos. Se debe valorar también en sarcomas de alto riesgo o en aquellos que se plantee RT adyuvante ( en sustitución de ésta)
- Radioterapia postoperatoria o preoperatoria: Valorar en:
  - Tumores > 5cm.
  - Tumores de alto grado (G2-G3) y profundos.
  - Resección marginal microscópica (tumor cercano a hueso, vasos o nervios)
  - Cuando la cirugía no se planificó con intención radical y el resultado obliga a una re-escisión.



La RT debe administrarse con la mejor técnica disponible, hasta una dosis total de 50 Gy, con un aumento de hasta 66 Gy según los márgenes de presentación y resección.

### II.1.c. Quimioterapia:

- Quimioterapia adyuvante o preferiblemente neoadyuvante ( Estudios GEIS-Grupo Italiano): Valorar en:
  - Sarcomas profundos de extremidades.
  - Alto grado definido como G3.
  - > 5 cm
  - ECOG 0-1.
  - < 65 años.
  - Pacientes sin alteraciones cardíacas, con función hematológica y renal normal.
  - Histología sensible: Se excluyen sarcoma alveolar, de células claras y retroperitoneal.

Esquema de quimioterapia (CATEGORÍA II-A)

Adriamicina 30 mg/m<sup>2</sup>, días 1 y 2

Ifosfamida 5 g/m<sup>2</sup> a repartir en 3 días.

+ G-CSF x 5 días

Cada 3 semanas x 3 ciclos.

Valorar sustituir la antraciclina en algunos pacientes, por epirrubicina 60 mg/m<sup>2</sup> x 2 y subir dosis de ifosfamida a 9 g/m<sup>2</sup> (Pegfilgrastim 6 mg sc, 48 horas después de la última dosis de ifosfamida), en pacientes jóvenes o cuando se administre como neoadyuvancia y que se quiera obtener más respuesta. (Esquema IE GEIS 25). Pegfilgrastim 6 mg sc, 48 horas después de la última dosis de ifosfamida.

\*Dosis de MESNA:

1/4 dosis de ifosfamida IV 15 minutos antes de la administración de ifosfamida y 1/2 de la dosis vía oral a las 4 y 8 horas de finalizar la infusión.

### II.2. Enfermedad avanzada

- **Elección primera línea:**

ADRIAMICINA 75mg/m<sup>2</sup> cada 3 semanas x 3 ciclos y reevaluar.

En tumores localmente avanzados o con volumen de enfermedad importante en los que interese una respuesta (pacientes seleccionados), por la posible reseccabilidad o para la disminución de síntomas:

EPIRRUBICINA 60 mg/m<sup>2</sup> x 2 + IFOSFAMIDA 9 mg/m<sup>2</sup> cada 3 semanas x 3 ciclos y reevaluar.

- **Segunda y siguientes líneas** (Pacientes con ECOG 0-2):

- Valorar ensayo clínico.
  - Pacientes asintomáticos, con tumores de bajo grado o escasa respuesta a quimioterapia: Valorar seguimiento.
  - IFOSFAMIDA A ALTAS DOSIS: Valorar en sarcoma sinovial y liposarcomas desdiferenciados o pacientes que han recibido previamente ifosfamida y no progresaron.  
IFOSFAMIDA 10g/m<sup>2</sup> – Escalar dosis a 12-14mg/m<sup>2</sup> cada 21 días.  
Precisa G-CSF. Administrar 6 ciclos. (mejor tolerancia en infusión continua).
  - GEMCITABINA-DTIC quincenal: Valorar fundamentalmente en leiomiosarcomas.  
Gemcitabina 1.800mg/m<sup>2</sup> (En 3 horas).  
DTIC 500mg/m<sup>2</sup>.
  - GEMCITABINA en monoterapia: Valorar fundamentalmente en leiomiosarcomas.  
Gemcitabina 1.000 mg/m<sup>2</sup> (días 1, 8, 15) cada 21 días
  - GEMCITABINA-DOCETAXEL: Valorar fundamentalmente en leiomiosarcomas y sarcomas pleomórficos.  
Gemcitabina 900-1000mg/m<sup>2</sup> en 90 minutos D1 y D8,  
Docetaxel 75-100mg/m<sup>2</sup> D8 + G-CSF.
- En angiosarcoma:
- Paclitaxel 80mg/m<sup>2</sup> D1, D8, D15 cada 28 días
- DACARBAZINA TRISEMANAL: Valorar fundamentalmente en leiomiosarcoma y en tumor fibroso solitario.  
DTIC 800 mg/m<sup>2</sup> cada 21 días
  - TRABECTEDINA: De elección en liposarcoma mixoide en segunda línea, valorar en leiomiosarcoma y sarcoma sinovial. Precisa reservorio.  
Trabectedina 1.5 mg / m<sup>2</sup> durante 24 h cada 21 días si CPK ≥ 2.5 x N
  - ERIBULINA: En liposarcomas. (ESMO-MCBS v1.1: 4)  
Eribulina 1,4 mg / m<sup>2</sup> en 2 a 5 min, días 1 y 8 cada 21 días.
  - PAZOPANIB: En sarcomas no adipocíticos.  
Pazopanib 800mg/día continuo en ayunas (ESMO-MCBS 3)  
Ojo: Toxicidad hepática: Analítica que incluya perfil hepático las semanas 3, 5, 7 y 9, posteriormente cada 4-6 semanas.

### II.3. Manejo en pacientes concretos.

- **Metástasis pulmonares EXCLUSIVAS:**
  - **Sincrónicas:** Quimioterapia, en caso de respuesta tumoral: valoración por cirugía.
  - **Metacrónicas (ILE ≥ 1 año):** Cirugía.

- **No resecable** (localizado o metastásico): Quimioterapia primera línea metastásica.
- Dermatofibrosarcoma protuberans: IMATINIB (800mg/día).
- Pcomas: Inhibidores mTOR.
- Tumor miofibroblástico inflamatorio con translocaciones ALK: Crizotinib (250mg/2 veces al día).
- Tumor fibroso solitario: Sunitinib (50mg/día régimen 4/2): En este subtipo también se puede usar Pazopanib, Trabectedina o Adriamicina-DTIC.
- Algoritmo de manejo del Tumor desmoide:

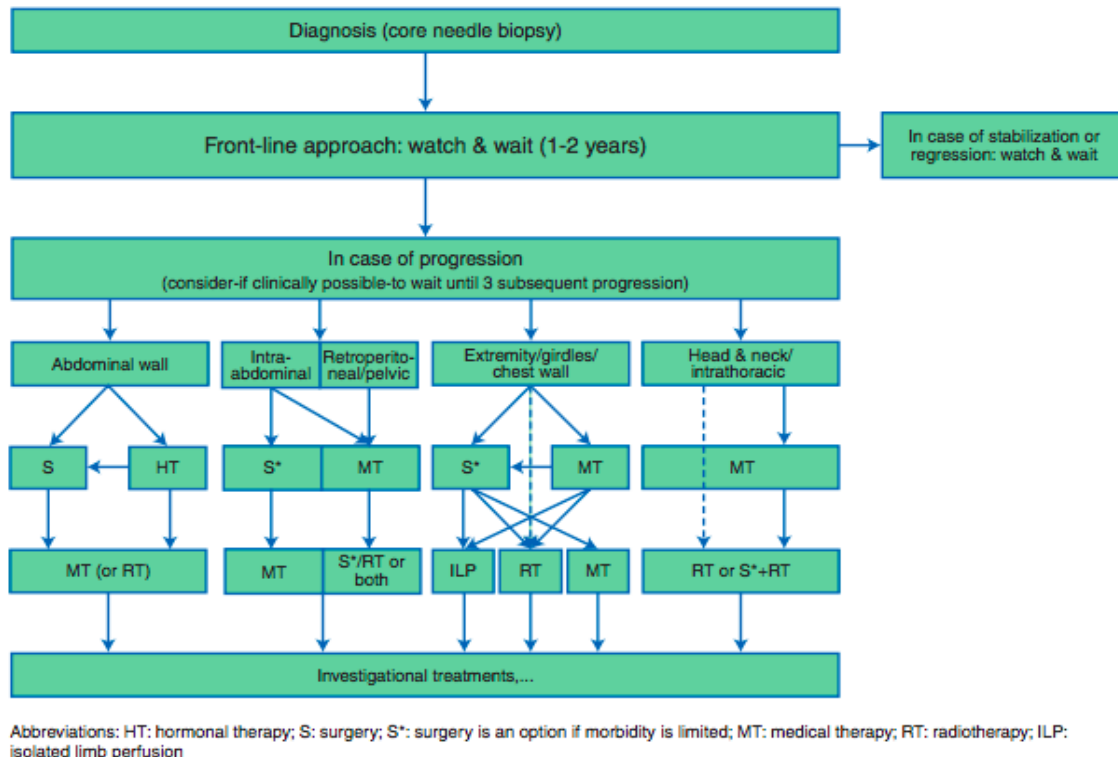

Elección: VIGILANCIA ESTRECHA durante 1-2 años con RM, la primera tras diagnóstico a las 8-12 semanas, posteriormente cada 3 meses durante el primer año, posteriormente cada 6 meses hasta el 5º año, anualmente a partir de entonces.

En caso de progresión se realizará tratamiento alternativo individualizado (tener en cuenta el tamaño inicial del tumor, tasa de crecimiento, localización anatómica, riesgo de compresión órganos, nervios, alteración de la funcionalidad):

- Cirugía
- Tratamiento médico: Tamoxifeno sólo o en combinación con AINEs, quimioterapia cuando tumor agresivo, localización anatómica crítica o fallo de hormonoterapia (régimen de "dosis baja" con metotrexato y / o vinblastina / vinorelbina) Regímenes basados en antraciclinas si se desea una respuesta más rápida. Valorar Sorafenib 400mg/día (Alliance A091105 trial), pazopanib 800mg/día (Estudio DESMOPAZ)
- Radioterapia: Dosis 56Gy.

- Radioterapia adyuvante tras resección quirúrgica incompleta. En cirugía R1 no se ha demostrado que la RT mejore los resultados. Se valorará individualmente en comité.

### **III. SEGUIMIENTO DE SARCOMAS DE PARTES BLANDAS:**

- 1º y 2º AÑO:
  - Cada 3 meses: Exploración, Rx tórax y analítica.
  - Cada 6 meses: TAC de tórax y RMN tumor primario (Si cirugía conservadora).
- 3º y 4º AÑO:
  - Cada 6 meses: TAC tórax/Rx tórax (alternando), Exploración y analítica.
  - Anual: RMN del primario (Cirugía conservadora).
- A partir del 5º año:
  - Anual: Analítica, Rx tórax.

En liposarcoma mixoide o de células redondas se debe realizar también estudio abdominal (TAC/Eco alternando), también en sarcomas de alto grado, retroperitoneales o uterinos.

En sarcomas retroperitoneales: TAC abdominal- pelvis cada 4 meses. (La sensibilidad de la ecografía es baja para la detección de recidivas)

Si se trata de liposarcomas bien diferenciados basta con Rx tórax (no TAC de tórax) dado el bajo riesgo de afectación pulmonar.

## Osteosarcoma e histiocitoma fibroso maligno de hueso y condrosarcoma desdiferenciado

### I. DIAGNÓSTICO Y ESTADIFICACIÓN:

Siempre: Presentación en **comité de sarcomas**.

- **Anamnesis.**
- **Exploración física** completa.
- **Analítica** con hemograma, bioquímica (función renal + iones, hepática, LDH, calcio proteínas totales y fosfatasa alcalina).
- **Rx simple tumor primario PA y lateral.**
- **RM de localización del tumor primario** (de todo el compartimento, con articulaciones adyacentes).
- **Rx tórax PA y Lateral.**
- **TAC tórax.**
- **Gammagrafía ósea.**
- **Biopsia con aguja gruesa guiada por radiología**
- **Ecocardiograma o FEVI por MUGA**
- PET-TAC: Valorar si tumor primario negativo en gammagrafía ósea.
- Preservación seminal/ovocitos (si deseos genésicos).
- Reservorio intravenoso

Tras la quimioterapia neoadyuvante se repetirá:

- Exploración física completa
- Hemograma y Bioquímica completa
- TAC de tórax<sup>[1]</sup><sub>SEP</sub>
- RMN del primario<sup>[1]</sup><sub>SEP</sub>
- Valorar arteriografía.

**ESTADIFICACIÓN:** TNM (AJCC), Enneking Staging for bone tumors.

### II. TRATAMIENTO

#### **II.1. ENFERMEDAD LOCALIZADA:**

QT neoadyuvante → CIRUGÍA → QT adyuvante

**Importante:** La quimioterapia neoadyuvante debe administrarse tan pronto como sea posible después del diagnóstico histológico y la estadificación. Los intervalos entre la quimioterapia y la cirugía, y la cirugía y la

## Osteosarcoma e histiocitoma fibroso maligno de hueso y condrosarcoma desdiferenciado

reanudación de la quimioterapia no deben durar más de 3 a 4 semanas. Los retrasos más prolongados pueden tener un impacto en la supervivencia libre de enfermedad (SSE) y la SG.

La cirugía se realizará en cuanto se alcancen; 80000 plaquetas y 1000 neutrófilos.

**II.1.a. QT Neoadyuvante:** Esquema MAP (HDMTX -ver Anexo Protocolo altas dosis metotrexate al final de la patología, Adriamicina, Cisplatino).

La complejidad del régimen obliga ver dosis y forma de administración directamente sobre artículo (protocolo EURAMOS)

No usar MTX en mayores de 40 años.

**Tabla 3** Esquema de quimioterapia MAP

| Fármaco     | Dosis                                                                                                                                                        | Semanas de tratamiento                                                                         |
|-------------|--------------------------------------------------------------------------------------------------------------------------------------------------------------|------------------------------------------------------------------------------------------------|
| Cisplatino  | 120 mg/m <sup>2</sup> (60 mg/m <sup>2</sup> /día 2 días)<br>Alternativa: 100 mg/m <sup>2</sup> × 1 día                                                       | Precirugía: 1 y 6<br>Cirugía: semana 11<br>Postcirugía: 12 y 17                                |
| Adriamicina | 75 mg/m <sup>2</sup><br>Esquema original: 37,5 mg/m <sup>2</sup> /día × 2 días en infusión continua<br>Alternativa: 25 mg/m <sup>2</sup> /d × 3 días en bolo | Precirugía: 1 y 6<br>Cirugía: semana 11<br>Postcirugía: 12, 17, 22 y 26                        |
| Metotrexate | 12 g/m <sup>2</sup> (con un máximo de 20 g/ciclo, en 4 horas × 1 día)                                                                                        | Precirugía: 4, 5, 9 y 10<br>Cirugía: semana 11<br>Postcirugía: 15, 16, 20, 21, 24, 25, 28 y 29 |

Se ha indicado la dosis y la cronología de administración de cada fármaco que se empleó en el brazo control de los ensayos aleatorizados INT 0133 y Euramos-1, indicándose además alternativas en la posología de cisplatino y adriamicina que han sido utilizadas en otros ensayos. Como se ha explicado en el texto no hay un consenso sobre la mejor manera de administrar este esquema, por lo que pueden considerarse válidas algunas variaciones del mismo.

Tras Cisplatino-Adriamicina: GCSF x 7 días

Necesidades para iniciar CDDP/Adriamicina:

- N ≥ 750.
- Plaquetas ≥ 75000.
- Bilirrubina total ≤ 1,25 x N
- Aclaramiento de creatinina ≥ 70ml/m/1,73m<sup>2</sup>
- FEVI ≥ 50%

Necesidades para iniciar HDMTX

- Mucositis ≤ Grado 1
- Neutrófilos ≥ 250
- Plaquetas ≥ 50.000
- No haya tercer espacio
- Bilirrubina ≤ 1,25 x LSN
- Las transaminasas pueden tener cualquier valor siempre que se justifique por toxicidad y NO por otra causa
- Aclaramiento de creatinina ≥ 70ml/m
- pH > 7

## Osteosarcoma e histiocitoma fibroso maligno de hueso y condrosarcoma desdiferenciado

### Consideraciones:

- Adultos mayores de 35 años: Cisplatino-Adriamicina, aunque en algunos pacientes seleccionados el programa MAP también podría ser una alternativa válida (IV, B). Si se usa HDMTX, se debe tener mucho cuidado y se debe considerar la reducción de la dosis.
- Adultos mayores: Las decisiones deben tomarse de manera individual, ya que la condición de la mayoría de estos pacientes no permite el uso de cisplatino-doxorrubicina, al menos a las dosis descritas.

### II.1.b. Cirugía

Evaluación de la respuesta a la quimioterapia: % de necrosis tumoral.

### II.1.c. QT adyuvante: Continuar con esquema QT neoadyuvante (elección)

(El cambio de quimioterapia en pacientes con mala respuesta no ha demostrado mejorar los resultados luego se debe usar el mismo esquema que en la neoadyuvancia independientemente de la respuesta).

**II.2. ENFERMEDAD METASTÁSICA AL INICIO:** Se tratan con una intención curativa siguiendo los mismos principios de los OS no metastásicos.

- CIRUGÍA METÁSTASIS PULMONARES: Se debe considerar como parte del enfoque de tratamiento en casos de metástasis pulmonares aisladas. Si ambos pulmones están involucrados, las metástasis de ambos lados deben extirparse siempre que sea posible en la misma sesión quirúrgica, para continuar o iniciar el tratamiento sistémico postoperatorio lo antes posible.

### II.3. RECAÍDA:

- a) Potencialmente resecable: CIRUGÍA
- b) No resecable: QUIMIOTERAPIA 2ª LÍNEA

### ESQUEMA QT 2ª Y 3 LÍNEAS:

- **IFOSFAMIDA-ETOPOSIDO +/- CARBOPLATINO:** Si el paciente recibió MAP previamente.  
Ifosfamida 1.800mg/m<sup>2</sup> D1-5 c/21 días  
Etopósido 100mg/m<sup>2</sup> D1-5 c/21 días.  
+/- Carboplatino 400mg D1-2 c/21 días.  
+GCSF x 5 días.
- **IFOSFAMIDA a altas dosis**  
Ifosfamida 1.200mg/m<sup>2</sup> x 5 días cada 21 días.
- **CICLOFOSFAMIDA-ETOPOSIDO** (Si toxicidad neurológica por ifosfamida)  
Ciclofosfamida 250mg/m<sup>2</sup> x 5 días.  
Etopósido 100mg/m<sup>2</sup> D1-5 c/21 días

## Osteosarcoma e histiocitoma fibroso maligno de hueso y condrosarcoma desdiferenciado

### - **CICLOFOSFAMIDA-TOPOTECAN**

Ciclofosfamida 250mg/m<sup>2</sup> x 5 días.

Topotecán 0.75mg x 5 días.

### - **GEMCITABINA-DOCETAXEL**

Gemcitabina 900-1000mg/m<sup>2</sup> en 90 minutos D1 y D8,

Docetaxel 75-100mg/m<sup>2</sup> D8 + G-CSF.

### - **SORAFENIB (IIIB)**

Sorafenib 400mg c/12h

## **II.4. RADIOTERAPIA:**

**Valorar en las siguientes situaciones:**

- Aduvante: Márgenes positivos. (Dosis 66 a 68 Gy)
- No resecables, enfermedad residual grave (Dosis 74 a 76 Gy (70 Gy si la quimioterapia concomitante).
- Palitativa: MTS óseas.

## **III. OSTEOSARCOMA PAROSTAL DE BAJO GRADO: CIRUGÍA**

## **IV CONDROSARCOMA:**

CIRUGÍA

- Si no resecable: Valorar RADIOTERAPIA
- Si CONDROSARCOMA MESENQUIMAL: IGUAL A SARCOMA DE EWING.
- Si CONDROSARCOMA DESDIFERENCIADO: IGUAL A OSTEOSARCOMA.

## **V. SEGUIMIENTO:**

- 1º y 2º AÑO:
  - Cada 3 meses: Exploración, Rx tórax, analítica y Rx tumor primario
  - Cada 6 meses: TAC de tórax y RMN tumor primario (Si cirugía conservadora).
- 3º y 4º AÑO:
  - Cada 6 meses: TAC tórax/Rx tórax (alternando), Exploración y analítica.
  - Anual: RMN del primario (Cirugía conservadora).
- A partir del 5º año:
  - Anual: Analítica, Rx tórax y Rx tumor primario

\*\* Ecocardiograma en pacientes que han recibido antraciclinas.



**ANEXO: PROTOCOLO QUIMIOTERAPIA (ALTAS DOSIS DE METOTREXATE):****Día 0:**

20:00 horas: Suero fisiológico 4000 cc cada 24 horas i.v (5 mEq CLK en cada 500cc).

Bicarbonato 1/6 M 250 cc iv cada 8 horas.

Control constantes, diuresis y pH en orina por turno. ANALÍTICA AL INGRESO

**Día 1:**

9:30 horas: Kytril 1 mg i.v. Dexametasona 8 mg i.v.

10:00 horas: Methotrexate .... gramos en 1000 ml de suero fisiológico a pasar en 4 horas iv. (Ojo! No administrar Methotrexate hasta que el pH de la orina sea > 7.5)

Mantener la pauta de sueroterapia y control de diuresis (y pH de orina). Órdenes complementarias:

- Sí pH de orina menor de 7: bicarbonato 1/6 M 250 cc i.v. en 30-60 minutos. [SEP]
- Control methotrexatemia y analítica (hemograma y bioquímica) a las 24, 48 y 72 horas de iniciado el methotrexate. [SEP]
- Leucovorin 10 mg iv.( Isovorín 5 mg IV) cada 6 horas desde las 24 horas del inicio de methotrexate y hasta niveles de methotrexate 1x10<sup>-7</sup> moles/litro (100 nmol/litro). [SEP]
- Omeprazol 20 mg cada 24 horas vo [SEP]
- Precauciones: NO ADMINISTRAR SALICILATOS [SEP]

**RESCATE METOTREXATE ( ISOVORIN LA MITAD DE DOSIS DE LEUCOVORIN)**

TABLE I. The Memorial Sloan Kettering Leucovorin Rescue Algorithm

| Time post-MTX administration | MTX level (μmol/L) | Leucovorin dose                  | Additional therapeutic modification                                                                                                                        |
|------------------------------|--------------------|----------------------------------|------------------------------------------------------------------------------------------------------------------------------------------------------------|
| 24 hrs.                      | ≤10                | 10 mg po q6h                     | IV hydration may be increased<br>IV hydration may be increased<br>Mandatory admission to hospital; hydration increased; frequent blood work and monitoring |
|                              | 10–20              | 20 mg po q6h                     |                                                                                                                                                            |
|                              | 20–30              | 30 mg po q6h                     |                                                                                                                                                            |
|                              | 30–50              | 50 mg po q6h                     |                                                                                                                                                            |
|                              | ≥50                | 1 g iv over 24 hrs.              |                                                                                                                                                            |
| 48 hrs.                      | ≤1                 | Continue previous 24-hrs. dosing | Reassess MTX level in 24 hrs. Discontinue leucovorin when MTX level is ≤0.1 μmol/L                                                                         |
|                              | 1 or greater       | Consider dose escalation         |                                                                                                                                                            |
|                              | ≤0.1               | Discontinue leucovorin           |                                                                                                                                                            |
| 72 hrs.                      | 0.1 or greater     | Continue previous 48 hrs. dosing |                                                                                                                                                            |

*Pediatr Blood Cancer* DOI 10.1002/pbc

- Si deterioro de la función renal: Carboxipeptidasa (50 U/kg por vía intravenosa durante 5 min)
- Si aumento de bilirrubina o toxicidad hepática G3-4 de > 3 semanas suspender metotrexate

## Sarcoma de Ewing, condrosarcoma mesenquimal y PNET y desmoplásico de células redondas

### I. DIAGNÓSTICO Y ESTADIFICACIÓN

Siempre: **Presentación en comité de sarcomas.**

- Anamnesis.
- Exploración física completa.
- Analítica con hemograma, bioquímica (función renal + iones, hepática, LDH, calcio proteínas totales y fosfatasa alcalina).
- Rx simple tumor primario.
- RM de localización del tumor primario (de todo el compartimento, con articulaciones adyacentes).
- Rx tórax PA y Lateral.
- TAC toracoabdominal.
- Gammagrafía ósea.
- Biopsia con aguja gruesa guiada por radiología
- Ecocardiograma o FEVI por MUGA
- PET-TAC: Valorar si tumor primario negativo en gammagrafía ósea.
- Preservación seminal (si deseos genésicos).
- Reservorio intravenoso.
- En sarcoma de Ewing o Ewing like Biopsia de médula ósea.

El diagnóstico histológico debe constar inmunohistoquímica y diagnóstico molecular;

translocación en Sarcoma de Ewing t(11;22) del gen EWSR1: Proteína de fusión EWS/FLI, o bien Ewing Like que se tratarán como sarcoma de Ewing.

Estadificación: Varios esquemas, ninguno generalmente aceptado: TNM (AJCC), Enneking Staging for bone tumors.

### II. TRATAMIENTO

#### **II.1. Enfermedad localizada:**

##### **II.1.a. Quimioterapia neoadyuvante:**

IFOSFAMIDA 1.800mg/m<sup>2</sup> x 5 días

ETOPÓSIDO 100mg/m<sup>2</sup> /d x 5 días + GCSF/días 6<sup>º</sup>-12

Alternando con:

ADRIAMICINA 75mg/m<sup>2</sup> día 1

(Se dará Adriamicina hasta alcanzar techo (375mg/m<sup>2</sup>) cuando se cambiará por ACTINOMICINA 1.25mg/m<sup>2</sup> día 1)

CICLOFOSFAMIDA 1.200mg/m<sup>2</sup> día 1

## Sarcoma de Ewing, condrosarcoma mesenquimal y PNET y desmoplásico de células redondas

VINCRISTINA 2mg día 1

G-CSF x 7-10 días.

Analítica semanal.

Se administrará cada 2 semanas siempre y cuando:

- Neutrófilos > 750, Plaquetas > 75.000.

Completar 9 ciclos y posteriormente tratamiento local.

#### II.1.b Tratamiento local:

- Cirugía/RT: La escisión quirúrgica completa se considera la mejor modalidad de control local. RT sólo (de 45 a 60 Gy): Si la excisión quirúrgica completa es imposible.

**II.1.c. RT adyuvante** (45 a 60 Gy): Valorar si márgenes quirúrgicos insuficientes, margen afecto, discutir si respuesta en muestra quirúrgica deficiente (> 10% de células tumorales viables).

**II.1.d. Quimioterapia adyuvante:** Completar 14 ciclos de esquema previamente mencionado.

**II.1.e.** Si radioterapia como tratamiento de la enfermedad localizada mantener la quimioterapia adyuvante durante la radioterapia (sin Actinomicina D).

**II.1.f.** Indicaciones de quimioterapia de dosis altas con Busulfán/Melfalán ( sólo en sarcoma de Ewing y PNET. No indicado en desmoplásico de células redondas. No hay datos en condrosarcoma mesenquimal).

| Case                                                                                                                                                                                                                                | Localised disease | Resected at diagnosis | Volume ≥200ml | Pre-operative RT | Histological response ≥10% viable tumour | Unresectable tumour treated with RT alone | Volume < 200ml but poor radiological response i.e. <50% regression with chemotherapy | Radiotherapy contraindications to BuMel <sup>***</sup> (see section 7.2.6.1) | Other medical contraindications to BuMel <sup>***</sup> | BuMel recommended |
|-------------------------------------------------------------------------------------------------------------------------------------------------------------------------------------------------------------------------------------|-------------------|-----------------------|---------------|------------------|------------------------------------------|-------------------------------------------|--------------------------------------------------------------------------------------|------------------------------------------------------------------------------|---------------------------------------------------------|-------------------|
| 1                                                                                                                                                                                                                                   | N                 | n/r                   | n/r           | n/r              | n/r                                      | n/r                                       | n/r                                                                                  | n/r                                                                          | n/r                                                     | N                 |
| 2                                                                                                                                                                                                                                   | Y                 | Y                     | N             | n/r              | n/r                                      | n/r                                       | n/r                                                                                  | n/r                                                                          | n/r                                                     | N                 |
| 3                                                                                                                                                                                                                                   | Y                 | Y                     | Y             | n/r              | n/r                                      | n/r                                       | n/r                                                                                  | N                                                                            | N                                                       | Y                 |
| 4                                                                                                                                                                                                                                   | Y                 | N                     | N             | n/r              | Y                                        | n/r                                       | n/r                                                                                  | N                                                                            | N                                                       | Y                 |
| 5                                                                                                                                                                                                                                   | Y                 | N                     | N             | Y                | Y                                        | n/r                                       | n/r                                                                                  | N                                                                            | N                                                       | Y                 |
| 6                                                                                                                                                                                                                                   | Y                 | N                     | Y             | N                | Y                                        | n/r                                       | n/r                                                                                  | N                                                                            | N                                                       | Y                 |
| 7                                                                                                                                                                                                                                   | Y                 | N                     | Y             | Y                | Y                                        | n/r                                       | n/r                                                                                  | N                                                                            | N                                                       | Y                 |
| 8                                                                                                                                                                                                                                   | Y                 | N                     | Y             | Y                | N                                        | n/r                                       | n/r                                                                                  | N                                                                            | N                                                       | Y                 |
| 9                                                                                                                                                                                                                                   | Y                 | N                     | Y             | Y                | n/a <sup>***</sup>                       | n/r                                       | n/r                                                                                  | N                                                                            | N                                                       | Y                 |
| 10                                                                                                                                                                                                                                  | Y                 | N                     | Y             | N                | n/a                                      | Y                                         | n/r                                                                                  | N                                                                            | N                                                       | Y                 |
| 11                                                                                                                                                                                                                                  | Y                 | N                     | N             | N                | n/a                                      | Y                                         | Y                                                                                    | N                                                                            | N                                                       | Y                 |
| Notes: n/r: not relevant n/a: not available<br><sup>***</sup> if response is Yes then high dose therapy (HDT) is contraindicated; <sup>***</sup> e.g. if extracorporeal irradiation of primary tumour used prior to re-implantation |                   |                       |               |                  |                                          |                                           |                                                                                      |                                                                              |                                                         |                   |

Contraindicaciones para Busulfán melfalán:

## Sarcoma de Ewing, condrosarcoma mesenquimal y PNET y desmoplásico de células redondas

- > 45 Gy to gastrointestinal tract and rectum (unless small volumes < 10 cc<sup>3</sup>)
- > 50 Gy to bladder (unless very small volumes < 10 cc<sup>3</sup>)
- > 30 Gy to spinal cord
- > 36 Gy to cauda equina including sacrum and nerve routes
- Any dose to the lung, for either primary rib tumours (unless very small volumes), or whole lung radiotherapy

## Esquema Bulsufan-Melfalan

## Agents and dosage

|                                                                                                                                                           | Day    | -7  | -6 | -5 | -4 | -3  | -2 | -1 | 0 |
|-----------------------------------------------------------------------------------------------------------------------------------------------------------|--------|-----|----|----|----|-----|----|----|---|
| <b>Busulfan</b> , IV (total of 16 doses)                                                                                                                  |        |     |    |    |    |     |    |    |   |
| Adults:<br>0.8mg/kg. body weight (BW)                                                                                                                     | T = 0  |     | X  | X  | X  | X   |    |    |   |
| Children and adolescents:<br><9kg: 1mg/kg. BW<br>9 - <16kg: 1.2mg/kg. BW<br>16 - 23kg: 1.1mg/kg. BW<br>>23 - 34kg: = 0.95mg/kg. BW<br>>34kg: 0.8mg/kg. BW | T = 6  | (X) | X  | X  | X  | (X) |    |    |   |
|                                                                                                                                                           | T = 12 | X   | X  | X  | X  |     |    |    |   |
|                                                                                                                                                           | T = 18 | X   | X  | X  | X  |     |    |    |   |
| <b>Melphalan</b> , IV<br>140mg/m <sup>2</sup> IV infusion<br>over 30 min.                                                                                 |        |     |    |    |    |     | X  |    |   |
| Clonazepam, orally or IV<br>0.025 to 0.1mg/kg/day                                                                                                         |        | X   | X  | X  | X  | X   | X  | X  |   |
| Stem cell re-infusion<br>(min. 3 x 10 <sup>6</sup> /kg. CD34 <sup>+</sup> )                                                                               |        |     |    |    |    |     |    |    | X |

Hydration should be given according to institutional guidelines.

+ GCSF

No se hará RT hasta 10 semanas después de Busulfán Melfalán

Resumen del esquema

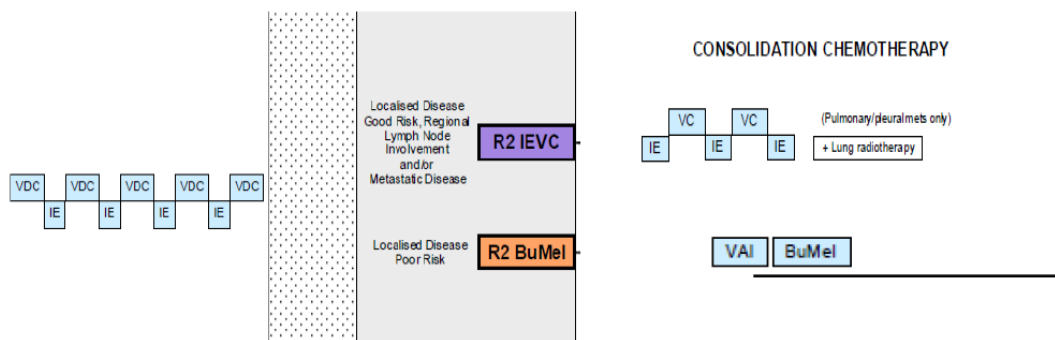

## Sarcoma de Ewing, condrosarcoma mesenquimal y PNET y desmoplásico de células redondas

### II.2. Enfermedad metastásica (mismo enfoque que en enfermedad localizada):

**II.2.a. QT neoadyuvante** (mismo esquema que en localizada), cada 2-3 semanas, completar 9 ciclos y valorar tratamiento local.

### II.2.b. Tratamiento local.

### II.2.c Completar 14 ciclos.

- Valorar cirugía de metástasis y en afectación pulmonar valorar RT pulmonar. También valorar cirugía o RT de otras localizaciones MTS.

### II.3. Quimioterapia de segunda línea:

- **IFOSFAMIDA – ETOPÓSIDO (Si no lo han recibido previamente)**

(cisplatino 20 mg/m<sup>2</sup>/día x 5 días)

Ifosfamida 1.200mg/m<sup>2</sup> x 5 días.

Etopósido 75mg/m<sup>2</sup> día x 5días

#### Otros esquemas de quimioterapia:

- IFOSFAMIDA A ALTAS DOSIS

Ifosfamida 1.200mg/m<sup>2</sup> x 5 días cada 21 días + GCSF.

- CICLOFOSFAMIDA-TOPOTECÁN

Ciclofosfamida 250mg/m<sup>2</sup> x 5 días.

Topotecán 0.75mg x 5 días.

- TEMODAL- IRINOTECÁN

Temozolamida 100mg/día x 5 días.

Irinotecan 25mg/m<sup>2</sup> D1-5 c/3 semanas (cefixima 400mg/día los días de quimioterapia +/-2 días)

- GEMCITABINA-DOCETAXEL. (Tercera línea) Se utilizará en tercera línea.

Gemcitabina 900-1000mg/m<sup>2</sup> en 90 minutos D1 y D8,

Docetaxel 75-100mg/m<sup>2</sup> D8 + G-CSF.

- En desmoplásico de células redondas PAZOPANIB 800mg/día

### III. SEGUIMIENTO:

- 1º y 2º AÑO:
  - Cada 3 meses: Exploración, Rx tórax, analítica y Rx del primario
  - Cada 6 meses: TAC de tórax y RMN tumor primario (Si cirugía conservadora).

## Sarcoma de Ewing, condrosarcoma mesenquimal y PNET y desmoplásico de células redondas

---

- 3º y 4º AÑO:
    - Cada 6 meses: TAC tórax/Rx tórax (alternando), Exploración, analítica y rx del primario
    - Anual: RMN del primario (Cirugía conservadora).
  
  - A partir del 5º año:
    - Anual: Analítica, Rx tórax y Rx primario
- Ecocardiograma en pacientes que han recibido antraciclinas.
- En desmoplásico de células redondas, incluir estudio abdominal en el seguimiento.

## Sarcomas uterinos

### I. LEIOMIOSARCOMA:

#### I.1. ESTUDIO DE EXTENSIÓN

- Anamnesis.
- Exploración física completa.
- Analítica con hemograma, bioquímica (función renal + iones, hepática, LDH, calcio y proteínas totales).
- TAC toraco-abdomino-pélvico
- Exploración ginecológica

#### I.2 TRATAMIENTO

##### I.2.a. Enfermedad localizada: CIRUGÍA, consistente en:

- Histerectomía total y exploración de cavidad abdominal
- Anexectomía: si afectación macroscópica de ovarios
- Linfadenectomía: si afectación extrauterina resecable o afectación ganglionar macroscópica.

Si el diagnóstico de sarcoma se produce como hallazgo incidental tras resección de un supuesto mioma, se realizará una segunda exploración quirúrgica.

- No indicación de RADIOTERAPIA Y QUIMIOTERAPIA ADYUVANTES.
- Valorar RT adyuvante si afectación de parametrios márgenes microscópicamente afectados (R1).

##### I.2.b. Enfermedad metastásica : (Ver dosis y pauta de administración en esquemas de Quimioterapia SPB adulto).

ADRIAMICINA (Elección)

GEMCITABINA-DOCETAXEL

GEMCITABINA-DACARBAZINA

TRABECTIDINA

PAZOPANIB

Si receptores hormonales positivos: valorar Hormonoterapia (Inhibidores aromatasa).

## II. SARCOMA DEL ESTROMA ENDOMETRIAL

#### II.1. ESTUDIO DE EXTENSION

- Anamnesis.
- Exploración física completa.
- Analítica con hemograma, bioquímica (función renal + iones, hepática, LDH, calcio y proteínas totales).
- Rx tórax PA y lateral.

- TAC abdómino-pélvico
- Exploración ginecológica

## II.2. TRATAMIENTO

### II.2.a. Enfermedad Localizada:

Histeroanexectomía-Linfadenectomía: si afectación extrauterina o ganglios aumentados de tamaño.

Valorar Radioterapia adyuvante

Valorar Hormonoterapia adyuvante: INHIBIDORES DE AROMATASA. Si receptores hormonales positivos. (NO existen estudios prospectivos randomizados que demuestren esta actitud, dado su beneficio en avanzado, se recomienda en estadio III o de alto riesgo)

### II.2.b. Tratamiento Enfermedad Metastásica Resecable:

CIRUGIA + HORMONOTERAPIA si RH +

(Deben figurar RRHH en la biopsia o pieza quirúrgica)

### II.2.c. Enfermedad No Resecable:

Si receptores hormonales positivos y crecimiento lento: HORMONOTERAPIA

- Premenopáusicas: INHIBIDORES DE AROMATASA + GnRH

(Contraindicado tamoxifeno)

- Postmenopáusicas: INHIBIDORES DE AROMATASA

Si receptores hormonales negativos o progresión a hormonoterapia:

ADRIAMICINA (Elección)

IFOSFAMIDA

GEMCITABINA-DOCETAXEL

Valorar también esquemas de SPB.

## III. SARCOMA ENDOMETRIAL INDIFERENCIADO

### III.1. ESTUDIO DE EXTENSION

- Anamnesis.
- Exploración física completa.
- Analítica con hemograma, bioquímica (función renal + iones, hepática, LDH, calcio y proteínas totales).
- TAC de tórax y TAC abdomen-pélvico
- Exploración ginecológica

### III.2. TRATAMIENTO

#### III.2.a. Enfermedad Localizada:

HISTERECTOMIA Y DOBLE ANEXECTOMIA



No se conoce el papel de la Adyuvancia.

### **III.2.b. Enfermedad Metastásica**

ADRIAMICINA

ADRIAMICINA-IFOSFAMIDA

ADRIAMICINA-EPIRRUBICINA

IFOSFAMIDA

GEMCITABINA-DOCETAXEL

TRABECTIDINA

### **IV. SEGUIMIENTO DE SARCOMAS UTERINOS**

- 1º y 2º AÑO:
  - Cada 3 meses: Exploración, Rx tórax, eco abdominopélvica y analítica.
  - Cada 6 meses: TAC de tóracoabdominal, exploración ginecológica.
- 3º y 4º AÑO:
  - Cada 6 meses: TAC tórax/Rx tórax (alternando), Exploración y analítica.
  - Anual: TAC abdomino-pélvico, exploración ginecológica.
- A partir del 5º año:
  - Anual: Analítica, Rx tórax eco abdominopélvica y exploración ginecológica.

Neoplasias neuroendocrinas (NNE)

I. DIAGNÓSTICO y ESTUDIO DE EXTENSIÓN

- Exploración física
- Analítica completa con hemograma y bioquímica.
  - o Estudios hormonales específicos (si síntomas específicos)
    - Tumores productores de hormonas: gastrina, VIP, glucagón, insulina, somatostatina, etc.
    - 5-HIAA en orina de 24 horas acidificada en NNE de localización intestino medio y TNE pulmonar.
    - Cromogranina A para NNE bien diferenciados G1-2
    - Catecolaminas, metanefrinas (para ganglioma/feocromocitoma) si HTA refractaria, crisis hipertensivas.
    - ACTH plasmático si hay síndrome de Cushing.
    - IGF-1 si hay acromegalia.
    - Cortisulurias (24 horas x 2 determinaciones) si hay síndrome de Cushing.
  - o Si síntomas inespecíficos: Cromogranina A, en sangre.
  - o NNE de alto grado: Enolasa neuronal específica, en sangre.
- TC torax-abdomen-pelvis con contraste.
- Gammagrafía de receptores de somatostatina (<sup>111</sup>In-DTPA-D-Phe-Octreotida) Indicado para diagnóstico y estadificación, seguimiento en pacientes con enfermedad, selección de pacientes candidatos a terapia análogos de somatostatina y radionúclidos, y si sospecha de recidiva. Sólo en G1-2
- Ecocardiografía y prueba proBNP. En TNE con síntomas compatibles con síndrome carcinoide. Valorar cardio-RM en casos seleccionados.

|                                                                                                             |                                                                   |                                                             |
|-------------------------------------------------------------------------------------------------------------|-------------------------------------------------------------------|-------------------------------------------------------------|
| - No insuficiencia tricuspídea (IT) o IT leve.<br>- Válvula pulmonar normal o alteración leve<br>- NYHA 0-1 | TRATAMIENTO MEDICO                                                |                                                             |
| - IT moderada/severa<br>- Válvula pulmonar afección moderada/severa<br>- NYHA 2-3                           | NNE con buen pronóstico a medio-largo plazo:<br>RECAMBIO VALVULAR | NNE con mal pronóstico a corto plazo:<br>TRATAMIENTO MÉDICO |

- PET-TC (<sup>18</sup>F-fluorodesoxi-D-glucosa).
  - o Despiñaje de metástasis de carcinoma neuroendocrino (G3) localizado
  - o NNE G2 por biopsia con evolución atípica que haga sospechar zonas G3.
- PET con <sup>18</sup>F-DOPA (<sup>18</sup>F-fluoro-L-dihidroxifenilalanina). No disponible en nuestro centro. Uso de forma muy excepcional, puesto que disponemos de Galio 68.
  - o Localización de tumores carcinoides

- Carcinoma medular de tiroides y Feocromocitomas
- Tumores derivados de los islotes pancreáticos.
- **PET con  $^{68}\text{Ga}$  GALIO-DOTA-peptidos.**
  - Localización y estudio de extensión de neoplasias neuroendocrinas gastroenteropancreáticas G1-2 metastasicos con octreoscan negativo.
  - Pacientes con NNE G1-2 metastasicos con opciones de cirugía.
  - NNE pancreáticas en los que no se plantee cirugía y solo seguimiento.
  - Casos de lesiones primarias desconocidas o lesiones sospechosas.
  - Seguimiento de pacientes para la detección de enfermedad residual, recidiva o progresión tumoral tras cirugía
  - Selección de pacientes candidatos a terapia con análogos de somatostatina y radionúclidos ( $^{117}\text{Lu}$  Lutecio ó  $^{90}\text{Y}$  Ytrio-DOTA-peptidos).
- **GGO.** En pacientes con FA elevada, síntomas de sospecha y carcinoma neuroendocrino si no se ha realizado PET-TC (G3) o PET-TC con Galio 68 en G1-2.
- Dependientes de localización y/o síntomas de síndrome carcinoide:
  - Estómago = **EDA, EUS y biopsia.**
  - I. Delgado = **Capsula endoscópica, EGD ó enteroclis.**
  - Hígado/Corazón = **EUS, biopsia, ecocardiografía.** En casos seleccionados cardio-RNM.
  - Páncreas = **EUS, Biopsia; test de Imamura** (si sospecha insulino)
  - Pulmon/Timo = **Broncoscopia, EBUS, mediastinoscopia, TC tórax**
  - Recto/Colon = **Colonoscopia**
- **Diagnóstico histológico.** Debe emplearse la clasificación anatomopatológica de la WHO (2010).

| Pancreatic NENs<br>WHO 2017                                                                                                                | Gastrointestinal Tract NENs<br>WHO 2010                                                      | Lung NENs<br>WHO 2015                                                                                                                                                                                                   |
|--------------------------------------------------------------------------------------------------------------------------------------------|----------------------------------------------------------------------------------------------|-------------------------------------------------------------------------------------------------------------------------------------------------------------------------------------------------------------------------|
| Well Differentiated                                                                                                                        |                                                                                              |                                                                                                                                                                                                                         |
| <b>PanNET G1</b><br>ki67<3%; <2 mit/10HPF<br><b>PanNET G2</b><br>ki67 3-20%; 2-20 mit/10HPF<br><b>PanNET G3</b><br>ki67>20%; >20 mit/10HPF | <b>NET G1</b><br>ki67 ≤2%; <2 mit/10HPF<br><b>NET G2</b><br>ki67 2-20% and/or 2-20 mit/10HPF | <b>Typical Carcinoid</b> = <2 mit/10HPF; no necrosis<br><b>Atypical Carcinoid</b> = 2-10 mit/10HPF and/or foci of necrosis                                                                                              |
| Poorly Differentiated                                                                                                                      |                                                                                              |                                                                                                                                                                                                                         |
| <b>PanNEC</b><br>G3 ki67>20% >20 mit/10HPF<br>Small cell type<br>Large cell type                                                           | <b>NEC</b><br>G3 ki67>20% and/or >20 mit/10HPF<br>Small cell type<br>Large cell type         | <b>NEC Small cell type</b> (also combined small cell NEC) = >10 mitoses/10HPF<br><b>NEC Large cell type</b> (also combined large cell NEC) = >10 mitoses/10HPF<br><br><b>Combined Small cell NEC</b> =>10 mitoses/10HPF |
| Mixed Neuroendocrine                                                                                                                       |                                                                                              |                                                                                                                                                                                                                         |
| <b>MiNEN:</b> Mixed Neuroendocrine-Nonneuroendocrine Neoplasm                                                                              | <b>MANEC:</b> Mixed Adeno-Neuroendocrine Carcinoma                                           |                                                                                                                                                                                                                         |

**II. SINDROME ENDOCRINOS FAMILIARES ASOCIADOS A NNE GASTROENTEROPANCREÁTICAS**

|                                                                                                                                                                                                                                                                                                | MEN-1                                                                                                                                                                                                                                                                                                           | VHL                                                                                                                                                                                                                                                                                                                                                                                  | NF-1                                                                                                                                                                                                                        | Esclerosis tuberosa                                                                                                                                                                                              |
|------------------------------------------------------------------------------------------------------------------------------------------------------------------------------------------------------------------------------------------------------------------------------------------------|-----------------------------------------------------------------------------------------------------------------------------------------------------------------------------------------------------------------------------------------------------------------------------------------------------------------|--------------------------------------------------------------------------------------------------------------------------------------------------------------------------------------------------------------------------------------------------------------------------------------------------------------------------------------------------------------------------------------|-----------------------------------------------------------------------------------------------------------------------------------------------------------------------------------------------------------------------------|------------------------------------------------------------------------------------------------------------------------------------------------------------------------------------------------------------------|
| Localizacion del gen                                                                                                                                                                                                                                                                           | Cromosona 11                                                                                                                                                                                                                                                                                                    | Cromosoma E; codifica la proteína VHL                                                                                                                                                                                                                                                                                                                                                | Cromosona 17; codifica la proteína neurofibromina                                                                                                                                                                           | Gen TSC1, Cr. 9, codifica la proteína hamartina<br>Gen TSC2, Cr 16, codifica la proteína tuberina                                                                                                                |
| Presencia de mutación                                                                                                                                                                                                                                                                          | 78-93% afectados.                                                                                                                                                                                                                                                                                               | Casi 100% de los afectados                                                                                                                                                                                                                                                                                                                                                           | 95% pacientes con criterios clínicos diagnósticos                                                                                                                                                                           | 60-80% de pacientes con criterios clínicos diagnósticos.                                                                                                                                                         |
| Correlación genotipo-fenotipo                                                                                                                                                                                                                                                                  | Sin fenotipo característico para mutación particular                                                                                                                                                                                                                                                            | <u>VHL tipo 1</u> : delecciones totales o parciales, <i>non-sense</i> y <i>frameshift</i> . Más riesgo de carcinoma renal.<br><u>VHL tipo 2 (A,B,C)</u> : mutaciones <i>missense</i> . La mutacion <i>missense</i> en el codón 167, se asocia a alto riesgo de feocromocitoma.                                                                                                       | No correlación entre pequeñas mutaciones. En el 5% de casos deleccion de todo o casi todo el gen, que se asocia a un fenotipo más severo en todas las manifestaciones clínicas y mayor riesgo de tumores neurales malignos. | Mutaciones en TSC1 determinan fenotipo menos severo, particularmente en lo referido a déficit mental.<br><br>Mutaciones en TSC2 determinan un fenotipo mas severo en todas las manifestaciones de la enfermedad. |
| Glándulas/ Órganos afectos                                                                                                                                                                                                                                                                     | <ul style="list-style-type: none"><li>- Paratiroides</li><li>- Islotes pancreáticos</li><li>- Hipófisis</li><li>- Adrenal</li><li>- Tiroides</li><li>- Múltiple</li><li>- Tejido subcutáneo</li><li>- Piel</li></ul>                                                                                            | <ul style="list-style-type: none"><li>- SNC</li><li>- Oído medio</li><li>- Riñon</li><li>- Adrenal</li><li>- Páncreas</li><li>- Epidídimo</li><li>- Ligamento ancho</li></ul>                                                                                                                                                                                                        | <i>Se han asociado de forma poco frecuente con NNE gastroenteropancreáticos.</i><br><i>En la NF-1 el NNE más frecuente es el somatostatinoma duodenal.</i>                                                                  |                                                                                                                                                                                                                  |
| Tumor                                                                                                                                                                                                                                                                                          | <ul style="list-style-type: none"><li>- Hiperplasia paratiroides</li><li>- Tumor islotes pancreáticos</li><li>- Adenoma de hipófisis</li><li>- Adenoma suprarrenal</li><li>- Adenoma de tiroides</li><li>- Carcinoides de pulmón y timo</li><li>- Lipomas subcutáneos</li><li>- Colagenomas cutáneos.</li></ul> | <ul style="list-style-type: none"><li>- Hemangioblastomas retinianos, cerebelosos, de tronco, de medula.</li><li>- Tumores de saco endolinfático en oído medio</li><li>- Carcinoma de células claras o quiste multiples renales</li><li>- Feocromocitoma</li><li>- Tumor pancreático o quiste</li><li>- Cistoadenoma epididimal</li><li>- Cistoadenoma de ligamento ancho.</li></ul> | <i>Se han asociado de forma poco frecuente con NNE gastroenteropancreáticos.</i><br><i>En la NF-1 el NNE más frecuente es el somatostatinoma duodenal.</i>                                                                  |                                                                                                                                                                                                                  |
| Indicaciones de estudio genetico                                                                                                                                                                                                                                                               |                                                                                                                                                                                                                                                                                                                 |                                                                                                                                                                                                                                                                                                                                                                                      |                                                                                                                                                                                                                             |                                                                                                                                                                                                                  |
| <ul style="list-style-type: none"><li>○ Se ha de hacer el screening de todo el gen, pues no hay “zonas calientes” de mutación.</li><li>○ La ausencia de mutación no excluye el diagnóstico.</li><li>○ Es un test que no es fácil, ni perfecto.</li><li>○ Existen mutaciones de novo.</li></ul> |                                                                                                                                                                                                                                                                                                                 |                                                                                                                                                                                                                                                                                                                                                                                      |                                                                                                                                                                                                                             |                                                                                                                                                                                                                  |

**Síndrome MEN-2:**

- MEN2A
  - Carcinoma medular de tiroides
  - Feocromocitoma
  - Hiperplasia de tiroides
  - Amilodosis de liquen plano

- Enfermedad de hirschsprung
- MEN2B
  - Carcinoma medular de tiroides
  - Feocromocitoma
  - Neuromas mucosos
  - Ganglioneuromatosis intestinal
  - Habito marfanoide

**\*\*En el síndrome MEN2 se han descrito NNE pancreáticos asociados con mucha menor frecuencia que en el MEN-1.**

| MEN-1                                                                                                                                                                                                                                                                                                                                                                                                                                                                                                                                                                                                                                                                                                                         | VHL                                                                                                                                                                                                                                                                                                                                                                                                                                                                                                                                                                                                                                                                                                                                                                                                                                                                                                                      |
|-------------------------------------------------------------------------------------------------------------------------------------------------------------------------------------------------------------------------------------------------------------------------------------------------------------------------------------------------------------------------------------------------------------------------------------------------------------------------------------------------------------------------------------------------------------------------------------------------------------------------------------------------------------------------------------------------------------------------------|--------------------------------------------------------------------------------------------------------------------------------------------------------------------------------------------------------------------------------------------------------------------------------------------------------------------------------------------------------------------------------------------------------------------------------------------------------------------------------------------------------------------------------------------------------------------------------------------------------------------------------------------------------------------------------------------------------------------------------------------------------------------------------------------------------------------------------------------------------------------------------------------------------------------------|
| <b>En caso índice</b> <ul style="list-style-type: none"> <li>• Claro criterios de Men-1: al menos 2 de los 3 tumores más frecuentes (paratiroides, NNE enteropancreático e hipofisario).</li> <li>• Sin criterios claros de MEN-1, pero sospechoso/atípico MEN-1:               <ul style="list-style-type: none"> <li>2 o más tumores relacionados (paratiroides, enteropancreáticos, hipófesis, adrenales, lipomas, carcinoides, angiofibromas, collagenomas).</li> <li>Tumores de paratiroides en &lt; 30 años.</li> <li>Hiperparatiroidismo recurrente.</li> <li>Gastrinoma a cualquier edad</li> <li>Múltiples tumores de islotes a cualquier edad</li> <li>Hiperparatiroidismo familiar aislado.</li> </ul> </li> </ul> | <b>En caso índice</b> <ul style="list-style-type: none"> <li>• Más de 2 lesiones asociadas a VHL (hemangioblastoma, carcinoma renal de células claras, feocromocitoma, tumor de saco endolinfático medio, cistoadenoma papilar epididimal, cistoadenoma seroso pancreático, NNE pancreático).</li> <li>• 1 lesión asociada a VHL e historia familiar de lesiones asociadas a VHL</li> <li>• Hemangioblastoma diagnosticado en &lt; 30 años.</li> <li>• &gt; 2 hemangioblastomas diagnosticados a cualquier edad</li> <li>• Carcinoma de células claras renal bilateral o múltiple.</li> <li>• Feocromocitoma bilateral o múltiple.</li> <li>• &gt; 1 cistoadenoma seroso pancreático</li> <li>• &gt; 1 NNE pancreático</li> <li>• Múltiples quistes pancreáticos en cualquier lesión asociada a VHL.</li> <li>• Cistoadenoma papilar epididimal a cualquier edad</li> <li>• Quistes epididimales bilaterales.</li> </ul> |
| <b>En familiares</b><br>Familiares de 1º grado de caso con mutación MEN-1 conocida.                                                                                                                                                                                                                                                                                                                                                                                                                                                                                                                                                                                                                                           | <b>En familiares</b><br>Familiares de 1º grado de caso con mutación VHL conocida.                                                                                                                                                                                                                                                                                                                                                                                                                                                                                                                                                                                                                                                                                                                                                                                                                                        |

  

| NF-1                                                                                                                    | ESCLEROSIS TUBEROSA                                                                                                                                 |
|-------------------------------------------------------------------------------------------------------------------------|-----------------------------------------------------------------------------------------------------------------------------------------------------|
| Para confirmar el diagnóstico en los casos de diagnóstico no claro o con solo 1 de los criterios de diagnóstico clínico | Para confirmar el diagnóstico en niños con probable/posible enfermedad (que no cumple los criterios clínicos precisos). En hermanos de caso índice. |

### **II.1. Tratamiento médico de los NNEGEP en síndromes endocrinos familiares:**

Ver tratamiento NNE pancreáticos.

### **II.2. Tratamiento quirúrgico de los NNEGEP en síndromes endocrinos familiares:**

#### **INSULINOMA**

- Ecografía intraoperatoria, para excluir tumores múltiples.
- Enucleación si es posible.
- Tumor en cuello, cola o cuerpo y no se puede enuclear → pancreatectomía distal o central.

- Múltiples: pancreatomectomía distal preservando bazo y enucleación de lesiones en cabeza.
- No hacer resecciones a ciegas.
- Si se sospecha malignidad, completar linfadenomectomía.

#### **GASTRINOMA** (normalmente intraduodenal o en cabeza de páncreas)

##### -Duodenales

- < 5 mm: duodenotomía y nucleación + linfadenomectomía periduodenal.
- > 5 mm: escisión ampliada de la pared duodenal + linfadenomectomía periduodenal.

##### -Páncreas

###### - Cabeza

- < 5 cm y no invasivo: enucleación y duodenotomía + linfadenomectomía periduodenal +/- pancreatomectomía distal con preservación del bazo. Recomendable colecistectomía profiláctica.
- > 5 cm o localmente invasivos: duodenopancreatomectomía + linfadenomectomía periduodenal.
- Cuello-cola: pancreatomectomía distal o enucleación, duodenotomía para detectar pequeños gastrinomas duodenales con linfadenomectomía regional (preservación del bazo)

##### -Oculto, no tumor primario

- Observar o enucleación y duodenotomía + linfadenomectomía periduodenal con preservación del bazo.

#### **GLUCAGONOMA** (normalmente en cola)

- Escisión del tumor + linfadenomectomía peripancreática
- Pancreatomectomía distal + linfadenomectomía peripancreática +/- esplenomectomía.

#### **VIPoma**

- Escisión del tumor + linfadenomectomía peripancreática ó duodenopancreatomectomía + disección de ganglios peripancreáticos.

#### **Tumores no funcionantes**

- $\leq 2$  cm: observar
- > 2 cm: pancreatomectomía distal preservando bazo y enucleación de lesiones en cabeza.

## **II. TRATAMIENTO**

### **A. NNE PULMONAR TÍPICO (G1-2)**

- **Enfermedad localizada (I-IIIa).**
  - Resección quirúrgica (Comité Multidisciplinar).
  - Terapias endobronquiales
  - Seguimiento en pacientes con MEN-1, reservando la cirugía si: nódulos con síntomas clínicos o paraneoplásicos, con tamaños grandes (se sugiere de unos 2-3 cm) o nódulos con rápido intervalo de crecimiento.

- **Enfermedad localmente avanzada (IIIB) o diseminada (IV).**

- Enfermedad resecable = Resección quirúrgica y/o terapias locales endobronquiales (Comité Multidisciplinar).
- Enfermedad irresecable
  - Asintomático = Seguimiento *versus* Analógicos de la somatostatina (ASS), en octreoscan positivo y/o bajo volumen de enfermedad.
  - Sintomático:
    - ASS → Octreoscan positivo y/o bajo volumen de enfermedad.
    - Inclusion en EECC
    - Everolimus tras progresión a ASS
    - QT (platino-etoposido) +/- RT. Si crecimiento rápido, enfermedad bulky, Octreoscan y/o Galio-68 negativo, o carcinoide atípico.
    - Manejo sintomático

## B. NNE PULMONAR ATÍPICO (G1-2)

- Enfermedad localizada (I-III A)

- Resección quirúrgica (lobectomía/neumonectomía) + linfadenectomía sistemática (hiliar y mediastínica).
  - Resección completa = SEGUIMIENTO. Valorar RT complementaria si pN2.
  - Resección incompleta RT +/- QT (cisplatino-etoposido)
  - Valorar RT complementaria si pN2.

- Enfermedad localmente avanzada (IIIB) o diseminada (IV).

- Si enfermedad resecable = Resección quirúrgica (lobectomía/neumonectomía) + linfadenectomía sistemática (hiliar y mediastínica).
- Si enfermedad irresecable
  - Asintomático = Seguimiento *versus* ASS → Octreoscan positivo y/o bajo volumen de enfermedad
  - Sintomático:
    - RT radical en enfermedad III no resecable y buen PS (0-1)
    - Considerar cirugía citoreductora
    - ASS → Octreoscan positivo y/o bajo volumen de enfermedad
      - Inclusion en EECC
      - **Everolimus 10 mg cada 24 horas** hasta progresión o toxicidad inaceptable. Si se necesita una reducción de la dosis, la dosis recomendada es de 5 mg/día y no debe reducirse por debajo de 5 mg/día.
      - Manejo sintomático (UCP si PS 2)
      - **Si progresión, quimioterapia con**

- Temozolamida
- DTIC
- Esquemas de pancreáticos (basados en estreptozocina o temodal)
- Si crecimiento rápido Carboplatino/Cisplatino-etopósido

### C. NNE GASTROENTEROPANCREÁTICO (GEP) G1-2:

#### • NNE PANCREÁTICOS FUNCIONANTES

- **GLUCAGONOMA:** Soporte nutricional, ASS y anticoagulación profiláctica (*para 2ª línea enfermedad diseminada ver NNE pancreáticos no funcionantes*).
- **SOMASTOSTATINOMA:** Soporte nutricional, ASS y anticoagulación profiláctica (*para 2ª línea enfermedad diseminada ver NNE pancreáticos no funcionantes*).
- **VIOMA:** Soporte nutricional, ASS y anticoagulación profiláctica (*para 2ª línea enfermedad diseminada ver NNE pancreáticos no funcionantes*).
- **GASTRINOMA**
  - IBP a dosis 2-3 veces superiores a las habituales indefinidamente: omeprazol 60-160 mg/día, pantoprazol 120-240 mg/día.
  - ASS si control insuficiente con IBP.
  - Cirugía (localización pancreática o duodenal)
    - $\geq 1$  cm: resección quirúrgica. Controvertida en MEN1 por su carácter multifocal, donde se indicará la cirugía en enfermedad metas asica con intención paliativa/citorreductora.
    - $< 1$  cm: Valorar resección endoscópica si duodenal.
- **INSULINOMA**
  - Cirugía si tras estudio diagnóstico se localiza la NNE:
    - Enucleación o resección segmentaria en la mayoría de los pacientes.
    - Cirugía oncológica si hay insulinoma maligno.
  - No localización de la NNE:
    - Cateterismo selectivo con perfusión de Calcio; si se localiza cirugía con las indicaciones previamente descritas. De lo contrario, cirugía con estudio intraoperatorio.

#### • NNE PANCREÁTICOS NO FUNCIONANTES

- Enfermedad resecable = Cirugía radical con criterios oncológicos incluyendo linfadenectomía y colecistectomía profiláctica (especialmente pacientes en tratamiento presente o futuro con ASS).
- Enfermedad irresecable
  - Actitud expectante (*wait & see*): Para pacientes con comorbilidades que limiten tratamiento o pronóstico vital del paciente inferior al pronóstico del NNE.
  - Si enfermedad M1 hepática, se valorará en Comité de Tumores la posibilidad de resección completa del tumor primario y metastásis hepáticas. Criterios para cirugía para NNE G1-2:
    - Paciente operable



- Posibilidad de reseccabilidad según los estudios de imagen preoperatorios > 90% del tejido tumoral.
- Tumor primario resecado o resecable.
- NNE G1-2 primario resecado o resecable.
- Sin M1 extraabdominal
- No carcinomatosis peritoneal difusa.
- Ausencia de insuficiencia cardíaca derecha severa o con posibilidad de control de cardiopatía carcinoide.
- Posibilidad de resección R0/R1 de las metástasis hepáticas con morbilidad aceptable con un remanente hepático funcional mayor o igual a 30% (o lo que es lo mismo, una carga hepática tumoral inferior a la 75%)
- Btotal < 3 x LSN, GOT/GPT < 5 x LSN
- PS 0-1
- Ausencia de invasión confluencia biliar, venas suprahepáticas o bifurcación portal.

**IMPORTANTE:** Tras cirugía R0 de metástasis no hay indicación de tratamiento adyuvante.

▪ **PRIMERA LÍNEA, con Octreoscan positivo o Galio-68 positivo o negativo con baja carga tumoral:**

- Somatulina autogel 120 cada 28 días, subcutánea profunda = G1-2 hasta Ki67 10%

▪ **SEGUNDA LÍNEA**

- Si lenta progresión
  - Aumentar dosis ASS: Somatulina autogel 120 mg c/14 días
  - Aumentar dosis ASS: Sandostatín LAR 30 mg cada 14 días
- Si enfermedad mayoritariamente hepática y esta es irresecable = embolización/quimioembolización hepática (*ver en apartado E. Tratamientos locales*).
- **Sunitinib 37,5 mg cada 24 horas sin periodo de descanso programado**, hasta progresión o toxicidad inaceptable. Se pueden aplicar modificaciones de la dosis con variaciones de 12,5 mg en base a la seguridad y la tolerabilidad individual. Añadir al AAS, si NNE pancreática funcionante
- **Everolimus 10 mg cada 24 horas** hasta progresión o toxicidad inaceptable. Si se necesita una reducción de la dosis, la dosis recomendada es de 5 mg/día y no debe reducirse por debajo de 5 mg/día. **ESMO-MCBS v1.1 = 3;** Añadir al AAS, si NNE pancreática funcionante.
- **Quimioterapia**, con esquemas basados en estreptozocina o temodal:

| 1 ciclo c/6 semanas                               | 1 ciclo c/6 semanas                               | 1 ciclo c/28 días                                                       |
|---------------------------------------------------|---------------------------------------------------|-------------------------------------------------------------------------|
| - ESTREPTOZOCINA 500 mg/m <sup>2</sup> /D D1 a D5 | - ESTREPTOZOCINA 500 mg/m <sup>2</sup> /D D1 a D5 | - Temozolomida 150-200 mg/m <sup>2</sup> repartido en dos dosis D10-D14 |
| - 5FU 400 mg/m <sup>2</sup> D1 a D5               | - Adriamicina 50 mg/m <sup>2</sup> D1             | - Capecitabina 600 mg/m <sup>2</sup> cada 12 horas D1 a D14             |

- **Lutecio.** La posología consiste 4 perfusiones de 7.400 MBq cada una. El intervalo entre administraciones recomendado es de 8 semanas, pudiéndose ampliar hasta un máximo de 16 semanas en caso de toxicidad modificadora de dosis. Se administrará en una instalación radiactiva autorizada (no necesariamente habituación plomada). En pacientes en tratamiento con ASS, se suspenderá su administración antes de la terapia 4-6 semanas antes en el caso de ASS de acción prolongada, y al menos 24 horas en caso de ASS de acción corta.
  - PS 0-2
  - NNE G1-2, KI67  $\leq$  20%
  - Expectativa de vida superior a 6 meses.
  - Hb > 9,5-10 g/L, Leucos > 3000 cel/mm<sup>3</sup>, plaquetas > 90.000 cel/mm<sup>3</sup>, Hematíes > 3.000.000/microL, Creatinina < 1,7 con ClCr > 60% (ajustado por edad).
  - Intervalo desde la última dosis de quimioterapia mayor a 6 semanas.

#### NNE GASTROINTESTINALES

|                                                                                                                                                                                                                                                                  |                                                                                                                                                                                                                                                                                                         |
|------------------------------------------------------------------------------------------------------------------------------------------------------------------------------------------------------------------------------------------------------------------|---------------------------------------------------------------------------------------------------------------------------------------------------------------------------------------------------------------------------------------------------------------------------------------------------------|
| <b>NNE yeyuno e ileon</b> <ul style="list-style-type: none"> <li>• T &lt; 1 cm, N0</li> <li>• T &gt; 1 cm, N+, multicéntricos</li> <li>• Íleon terminal</li> </ul>                                                                                               | <ul style="list-style-type: none"> <li>• Resección segmentaria + linfadenectomía</li> <li>• Resección intestinal amplia + linfadenectomía</li> <li>• Hemicolectomía derecha</li> </ul>                                                                                                                  |
| <b>NNE duodeno</b> <ul style="list-style-type: none"> <li>• T &lt; 1 cm</li> <li>• T 1-2 cm</li> <li>• T &gt; 2 cm y/o N+ o tumor periampular</li> </ul>                                                                                                         | <ul style="list-style-type: none"> <li>• Resección endoscópica</li> <li>• Resección endoscópica versus cirugía</li> <li>• Duodenectomía; DPC</li> </ul>                                                                                                                                                 |
| <b>NNE colon</b> <ul style="list-style-type: none"> <li>• &lt; 2 cm (T1), N0, G1-2</li> <li>• <math>\geq</math> 2 cm o invasión muscular propia (T2) o G3</li> </ul>                                                                                             | <ul style="list-style-type: none"> <li>• Extirpación completa vía endoscópica</li> <li>• Colectomía + linfadenectomía regional</li> </ul>                                                                                                                                                               |
| <b>NNE recto</b> <ul style="list-style-type: none"> <li>• <math>\leq</math> 1 cm</li> <li>• 1-2 cm</li> <li>• &gt; 2 cm</li> </ul>                                                                                                                               | <ul style="list-style-type: none"> <li>• Resección endoscópica; si margen positivo escisión transanal/resección endoscópica</li> <li>• Si infiltración muscular propia (T2) y/o invasión vascular = RAB o AAP; de lo contrario escisión transanal/resección endoscópica</li> <li>• RAB ó AAP</li> </ul> |
| <b>NNE apendicular</b> <ul style="list-style-type: none"> <li>• <math>\leq</math> 2 cm</li> <li>• &gt; 2 cm o invasión mesoapendice (&gt;3mm), invasión márgenes, carcinoide células globoides, adenoneuroendocrino) o presencia de invasión vascular</li> </ul> | <ul style="list-style-type: none"> <li>• Apendicetomía</li> <li>• Hemicolectomía derecha (controvertido)</li> </ul>                                                                                                                                                                                     |

#### Enfermedad irresecable o diseminada:

- **PRIMERA LÍNEA, con Octreoscan/Galio-68 positivo y con baja carga tumoral:**
  - FUNCIONANTES

- Somatulina autogel 120 cada 28 días, subcutánea profunda
- Sandostatín LAR 30 mg cada 28 días, intramuscular
- NO FUNCIONANTE
  - Somatulina autogel 120 cada 28 días, subcutánea profunda = en G1-2 hasta Ki67 10%
  - Sandostatín LAR 30 mg cada 28 días, intramuscular = En G1
- **SEGUNDA LINEA**
  - Si lenta progresión:
    - Aumentar dosis ASS: Somatulina autogel 120 mg c/14 días
    - Aumentar dosis ASS: Sandostatin LAR 30 mg IM c/14 días
  - **Añadir al AAS, everolimus 10 mg cada 24 horas** hasta progresión o toxicidad inaceptable. Si se necesita una reducción de la dosis, la dosis recomendada es de 5 mg/día y no debe reducirse por debajo de 5 mg/día. **ESMO-MCBS v1.1 = 3.**
  - **Lutecio, si Octreoscan/Galio 68 positivos.** La posología consiste 4 perfusiones de 7.400 MBq cada una. El intervalo entre administraciones recomendado es de 8 semanas, pudiéndose ampliar hasta un máximo de 16 semanas en caso de toxicidad modificadora de dosis. Se administrará en una instalación radiactiva autorizada (no necesariamente habituación plomada). En pacientes en tratamiento con ASS, se suspenderá su administración antes de la terapia 4-6 semanas antes en el caso de ASS de acción prolongada, y al menos 24 horas en caso de ASS de acción corta.
    - PS 0-2
    - NNE G1-2, Ki67 ≤ 20%
    - Expectativa de vida superior a 6 meses.
    - Hb > 9,5-10 g/L, Leucos > 3000 cel/mm3, plaquetas > 90.000 cel/mm3, Hematíes > 3.000.000/microL, Creatinina < 1,7 con ClCr > 60% (ajustado por edad).
    - Intervalo desde la última dosis de quimioterapia mayor a 6 semanas.
  - Si enfermedad mayoritariamente hepática = embolización/ quimioembolización hepática (*ver en apartado E. Tratamientos locales*).
  - **Quimioterapia.** Como última opción en tumores de rápido crecimiento y con alta carga tumoral:
    - ESTREPTOZOTOCINA - 5FU (1 ciclo c/6 semanas)
      - STZ 500 mg/m2/D D1 a D5
      - 5FU 400 mg/m2 D1 a D5
    - TEMOZOLOMIDA - CAPECITABINA (1 ciclo c/28 días)
      - Temozolomida 150-200 mg/m2 repartido en dos dosis D10-14.
      - Capecitabina 600 mg/m2 cada 12 horas D1 a D14

#### D. NNE G3 (CEPD):

- Enfermedad localizada: Resección quirúrgica oncológica y valoración de tratamiento adyuvante con esquema CDDP + VP-16 por 4 ciclos, especialmente si Ki67 > 55% (por mayor sensibilidad a quimioterapia). En su defecto, en pacientes con intolerancia/contraindicación para cisplatino, usar carboplatino AUC 5-6. Si R1 valoración de RT adyuvante.
- Enfermedad localmente avanzada irresecable: Tratamiento de QTRT radical con esquema CDDP + VP-16 por 4 ciclos.
- Enfermedad metastásica:

#### PRIMERA LINEA

- CDDP + VP-16 (1 ciclo c/21 días)
  - CDDP 100 mg/m<sup>2</sup> iv D1
  - VP-16 100 mg/m<sup>2</sup> D1-3
- CBDCA + VP-16 (1 ciclo c/21 días)
  - CBDCA AUC 5/6 iv D1
  - VP-16 100 mg/m<sup>2</sup> D1-3
- Estreptozotocina (STZ) + 5FU si Ki67 < 55% (1 ciclo c/6 semanas)
  - STZ 500 mg/m<sup>2</sup>/D D1 a D5
  - 5FU 400 mg/m<sup>2</sup> D1 a D5
- Temozolomida + Capecitabina si Ki67 < 55% (1 ciclo c/28 días)
  - Temozolomida 150-200 mg/m<sup>2</sup> repartido en dos dosis D10-14.
  - Capecitabina 600 mg/m<sup>2</sup> cada 12 horas D1 a D14

Se seleccionará un esquema de G3 (platino-etopósido) o de G2 (STZ o temodal + capecitabina) según:

1. Velocidad de crecimiento → A mayor velocidad elegir platino etopósido
2. Captación en Octreoscan/PET-FDG → Cuanto menos capte Octreoscan y más el PET-FDG, balanza se inclina hacia platino-etopósido.
3. A mayor Ki67, balanza se inclina hacia platino-etopósido (sobre todo a partir de 55%)

#### SEGUNDA LINEA

Utilizar el mismo esquema de QT en 1ª línea si última dosis > 6 meses; de lo contrario pasar a esquemas en monoterapia o poliquimioterapia:

- FOLFIRI
- XELOX
- Temozolomida + Capecitabina
- Paclitaxel 175 mg/m<sup>2</sup> + carboplatino AUC 6 (1 ciclo cada 21 días), si no ha recibido previamente esquema basado en platino.

E. **TRATAMIENTOS LOCALES.** Se valorará esta opción en enfermedad metastásica exclusiva o predominante hepática en tumores funcionantes G1-2 con mal control con tratamiento sistémico:

- **Ablacion por radiofrecuencia.** La vía de acceso puede ser laparotomía, laparoscópica o percutánea. Consiste en la inserción de un electrodo en la metástasis hepática guiado por eco o TAC. En el electrodo se genera una corriente alterna de alta frecuencia (460 Hz) que produce elevadas temperaturas (60°C) por vibración iónica.
- **Ablacion por microondas.** La sonda intrametastásica produce ondas de aprox. 45 W. La coagulación tumoral puede ocurrir a lo largo de los casos disminuyendo la posibilidad de recaída.
- **Radioembolizacion con microesferas**

#### CONTRAINDICACIONES ABSOLUTAS

- RT hepática previa
- Ascitis sintomática o Insuficiencia hepática (bilirrubina > 2-3 xLSN, ascitis, alteración de la coagulación).
- Anomalías de la vascularización hepática que pudieran producir un reflejo significativo de la sangre arterial al estómago, páncreas o intestino, no susceptibles de ser embolizadas.
- Superficie hepática afectada > 75%
- Albúmina sérica < 3 gr/dl.
- Gammagrafía con 99mTc-Macroagregados de albumina pretratamiento que demuestre la existencia de una comunicación (shunt) hepatopulmonar superior al 20%

- **Estudios previos a la terapia:** TAC triple fase con contraste o RM con gadoleno, hemograma-coagulación-marcadores tumorales, Gammagrafía con 99mTc-Macroagregados de albúmina con SPECT/TC, Arteriografía hepática.
- **Técnica de la terapia:**
  - ✓ **<sup>90</sup>Y-microesferas:** Dos tipos existentes, SIR-spheres® y Terasphere®
  - ✓ Suspenden antiangiogénicos un periodo suficiente.
  - ✓ Cálculo del shunt hepatopulmonar: no exceder 25-30 Gy de dosis absorbida pulmonar.
  - ✓ Sedación ligera con analgesia intravenosa antes de la terapia.
  - ✓ Inyección directa a través de un catéter introducido en la arteria hepática seleccionada durante la realización de una arteriografía hepática.
  - ✓ Posteriormente el paciente vuelve a su habituación y persiste ingresado en el hospital 24-48 horas.
  - ✓ Se obtiene técnica de imagen de control (gammagrafía con SPECT/TC).
  - ✓ Puede realizarse un tratamiento del hígado completo, de un solo lóbulo o separadamente de cada lóbulo o segmento hepático.
  - ✓ En tratamiento secuencial, se recomienda 30-45 días de intervalo.
  - ✓ En retratamiento (siempre que la primera dosis haya demostrado su eficacia), esperar 90 días de intervalo.
- **Quimioembolización hepática/embolización hepática,** indicada si buena función hepática y renal, PS 0-1 y ausencia de contraindicaciones que se describen:

|                                     |                                                                                                                                                                                                                                                                                                                                                            |
|-------------------------------------|------------------------------------------------------------------------------------------------------------------------------------------------------------------------------------------------------------------------------------------------------------------------------------------------------------------------------------------------------------|
| <b>CONTRAINDICACIONES RELATIVAS</b> | <ul style="list-style-type: none"> <li>- Trombosis portal</li> <li>- Obstrucción biliar</li> <li>- Afectación hepática mayor al 75%</li> <li>- Insuficiencia cardíaca</li> <li>- Shunt a pulmón</li> </ul>                                                                                                                                                 |
| <b>CONTRAINDICACIONES ABSOLUTAS</b> | <ul style="list-style-type: none"> <li>- Encefalopatía hepática</li> <li>- Ictericia</li> <li>- Insuficiencia hepática (bilirrubina &gt; 2-3 xLSN, ascitis, alteración de la coagulación).</li> <li>- PS 3-4</li> <li>- Alteraciones de la coagulación</li> <li>- Alergia a contraste</li> <li>- Enfermedad vascular severa</li> <li>- Whipple.</li> </ul> |

- **Protocolo:** A todos los pacientes se les administra sedación, analgésicos y ATB profiláctico antes de la técnica y en tumores funcionantes, tratamiento con AAS durante el procedimiento. Se debe realizar angiografía visceral para identificar el aporte arterial hepático, confirmar la permeabilidad de la vena porta y conocer posibles variantes anatómicas. Seguidamente, cateterismo selectivo por la arteria de la que dependa la irrigación tumoral, con un catéter de pequeño calibre entre 2,7- 4 Fr. Para la embolización, se realiza el bloqueo del flujo arterial hepático empleando partículas como Espongostan<sup>®</sup>, Ivalón<sup>®</sup> o microesferas tipo COnTour<sup>®</sup> o Embosphere. Para la quimioembolización, se pueden emplear agentes quimioterápicos como 5FU, adriamicina, estreptozotocina (ésta bajo anestesia general), mezclados con sustancia oleosa tipo lipiodol; es recomendable tratar solo un lóbulo de inicio y realizar a las 4-6 semanas el tratamiento del lóbulo contralateral. Tras el procedimiento, pauta de ATB, antieméticos y analgésicos como tratamiento sintomático del síndrome posembolización.

## F. TRATAMIENTO SÍNDROME CARCINOIDE

- **Medidas generales**
  - Evitar alimentos precipitantes serotonina liberadores (plátano, kiwi, fresas, frutos secos, queso)
- **Tratamientos**
  - **Octreotida 150 mg/8 horas** subcutánea hasta el control inicial de los síntomas.
  - Tratamiento local de las lesiones hepáticas y tratamiento de la enfermedad
  - **Telotristat** para el control en diarreas no suficientemente controladas con ASS a pesar de subida de dosis, corticoides, loperamida....
  - En crisis carcinoide → Octreotido 50-100 mcg/h en infusión de 24 horas hasta por lo menos 12 horas de terminar crisis carcinoide
- **Profilaxis**
  - Si el paciente está recibiendo ASS de liberación prolongada, se administrará un bolo suplementario de octreotida 500 microgramos sc. 1-2 horas antes de una cirugía/tratamiento local sobre las metástasis hepáticas.

- Si no recibía previamente ASS, octreotida 500 microgramos sc. 1-2 horas de la cirugía/ tratamiento local sobre las metástasis hepáticas y en caso de urgencias 1000 microgramos iv.

### **III. SEGUIMIENTO.**

#### **III.1. PORTADORES MUTACIONES GEN VHL**

- a. **Angiomas retinianos:** De a 1-10 años → Examen de retina con dilatación de pupila con periodicidad anual. De 11-19 años → ídem. Si  $\geq 20$  años → ídem.
- b. **Feocromocitoma:** De a 1-10 años → Catecolaminas en plasma o en orina de 24 horas con periodicidad anual. De 11-19 años → ídem. Si  $\geq 20$  años → ídem. Las pruebas de imagen solo están indicadas si se confirman niveles elevados de catecolaminas en plasma o en orina de 24 horas.
- c. **Tumores del saco endolinfático:** De a 1-10 años → Audiometría cada 2-3 años. De 11-19 años → Audiometría cada 2 años. Si  $\geq 20$  años → audiometría cada 2 años y RM craneal/base de cráneo cada 2 años. En el caso de presentar síntomas (además de la pérdida de audición) de acúfenos, vértigo, recomendado realizar TC o RM de la base de cráneo y valoración de conducto auditivo interno.
- d. **Patología intraabdominal** (C. Células clara renal, cistoadenomas serosos, NNE pancreáticos y feocromocitoma): De 11 -19 años, ecografía abdominal, con frecuencia anual. Si  $\geq 20$  años → ecografía abdominal, con frecuencia anual y TC abdominal con y sin contraste (o RM) cada 2 años. Realizar siempre TC abdominal o RM en caso de sospecha de patología en la ecografía.
- e. **Hemangioblastomas del SNC:** edad 11-19 años, RM de cráneo y medula espinal con gadolinio cada 2 años. Si  $\geq 20$  años → ídem

#### **III.2. PORTADORES MUTACIONES GEN MEN-1**

- a. **Adenoma paratiroides:** inicio a los 8 años. Anualmente calcio, pTH, vitamina D.
- b. **Gastrinoma:** inicio a los 20 años. Anualmente gastrina.
- c. **Insulinoma:** inicio a los 5 años. Anualmente glucosa plasmática en ayunas, insulina, pro-insulina.
- d. **Otros tumores enteropancreáticos:** a partir de los 20 años. Anualmente CgA, glucagón, VIP, polipéptido pancreático.
- e. **Tumores carcinoides:** a partir de los 20 años. Anualmente TC torax-abd superior.

#### **III.3. NNE PULMONARES**

- a. **Carcinoide típico intervenido con radicalidad R0** = revisiones anuales, tras una primera revisión post-cirugía sin lesiones.
  - Clínica y exp. Física
  - TAC torax-abd superior
  - Octreoscan si sospecha de recidiva
- b. **Carcinoide atípico intervenido con radicalidad R0** = Revisiones semestrales los 2 primeros años, luego anuales. Si alto riesgo por pN2-3 ó R1 comenzad con revisiones cada 3 meses

- Clínica y exp. Física
  - 5-HIAA en orina y/o Cromogranina A (CgA) sérica
  - TAC torax-abd superior
  - Octreoscan si sospecha de recidiva
- c. **Recidiva tumoral/enfermedad diseminada** = cada 3 meses con exploración clínica/física, bioquímica (5-HIAA en orina y/o CgA sérica) e imagen (TAC) semestral. Si lenta evolución, id separando revisiones.

#### III.4. NNE PANCREATICOS

- a. **Enfermedad reseçada** = Cada 6-12 meses, exploración clínica/física, bioquímica con CgA e imagen (TAC abdomen-pelvis y Rx de tórax) anual.
- b. **Enfermedad metastásica** = cada 3 meses con exploración clínica/física, bioquímica (5-HIAA en orina sólo si síndrome carcinoide y/o CgA sérica) e imagen (TAC) semestral. Según velocidad de crecimiento se realizará analítica y TAC cada 3-6 meses. Si no hay enfermedad pulmonar revisad con radiografía de tórax y TAC abdominoepelvis

#### III.5. NNE GASTROINTESTINALES

- a. **Yeyuno/ileon** = CgA, 5-HIAA y TC/RM abdominal cada 6-12 meses y posteriormente anual de forma indefinida, valorando separar seguimiento a cada 2 años pasados los 10 años de seguimiento.
- b. **Duodeno**
- T < 1 cm y Resección endoscópica: Endoscopia digestiva, ECO-TAC torax-abd-pelvis y CgA a los 6,12 meses y posteriormente anual.
  - Resto: TAC tórax-abdomen-pelvis y CgA cada 6-12 meses.
- c. **Colon** = CgA, 5-HIAA urinario y TC helicoidal cada 6-12 meses y posteriormente anual indefinido
- d. **Recto**
- < 1 cm: ALTA DEL PACIENTE SIN SEGUIMIENTO ONCOLÓGICO\_(rectoscopias de control con carácter semestral durante los 2 primeros años, luego anual hasta los 5 años; colonoscopias de screening al 2º año.
  - ≥ 1 cm:
    - a. Rectoscopia: cada 6 meses durante 2 años, luego anual hasta los 5 años.
    - b. CgA: cada 6 meses durante 2 años, luego anual hasta los 5 años.
    - c. TAC: anual durante los 3 primeros años.
- e. Apéndice
- Bien diferenciados < 1 cm y R0 = ALTA DEL PACIENTE SIN SEGUIMIENTO ONCOLÓGICO, a valorar en 1-2 seguimiento anual.
  - Bien diferenciados, 1-2 cm y R0 = seguimiento anual.
  - Resto: Control a los 6, 12 meses y posteriores anual



## Tumores cerebrales

### **I. MEDULOBLASTOMA**

#### **I.1. DIAGNÓSTICO Y ESTUDIO DE EXTENSIÓN:**

- Tumor maligno cerebral más frecuente en la infancia (aprox 20% de los tumores 1º SNC en menores de 19 años). Muy poco frecuente después de los 40 años.
- El 5-6% ocurren en asociación a algún síndrome de predisposición al cáncer: NBCCS (nevoid basal cell carcinoma síndrome), Sd Li-Fraumeni, FAP.
- Localización en cerebelo.
- Síntomas de hipertensión intracraneal y disfunción cerebelosa.

#### **I.1.a. DIAGNÓSTICO:**

-Exploración neurológica

-Análítica sanguínea con hemograma, función renal, iones y perfil hepático.

-RMN cerebral

-Confirmación histopatológica con la pieza quirúrgica (en pacientes con sospecha de meduloblastoma por imagen, no se realiza biopsia de rutina, porque la máxima resección quirúrgica es parte integral del manejo).

#### **I.1.b. ESTUDIO DE EXTENSIÓN:** (aprox 1/3 metastatizan en todo el SNC a través del LCR).

-Citología del LCR: En la mayoría de pacientes, la punción lumbar se realiza tras la cirugía, debido a la extensión de la enfermedad en la fosa posterior. Esperar al menos 2 semanas para realizarla.

-RM neuro-eje: la combinación de los 2 tests aumenta la sensibilidad diagnóstica. La interpretación de la misma tras la cirugía puede ser dificultosa. Se debe realizar idealmente antes de la cirugía o esperar al menos 2 semanas tras la misma.

- Las metástasis fuera del SNC son muy poco frecuentes, por lo que en el estudio de extensión no es preciso realizar TC de tórax-abdomen-pelvis de rutina.

#### **I.1.c. ESTADIFICACIÓN DE CHANG MODIFICADA:**

**Extensión del tumor:**

|     |                                                                                                                 |
|-----|-----------------------------------------------------------------------------------------------------------------|
| T1  | Tamaño < 3 cm de diámetro limitado a cerebelo y techo del IV ventrículo o hemisferios                           |
| T2  | Tamaño >3cm de diámetro o que invade estructuras adyacentes o que ocupa parcialmente el techo del IV ventrículo |
| T3a | Tumor >3cm diámetro con extensión al acueducto de Silvio y/o el forámen de Luschka                              |
| T3b | Tumor >3cm diámetro con extensión al tronco encéfalo*                                                           |
| T4  | Tumor >3 cm diámetro con extensión por encima del acueducto de Silvio y/o por debajo del forámen magno.         |

- No se tiene en cuenta el número de estructuras invadidas o la presencia de hidrocefalia

\* T3b puede ser definido por demostración intraoperatoria de la extensión del tumor al tronco encéfalo en ausencia de evidencia radiográfica

#### Metástasis:

|    |                                                                                                                      |
|----|----------------------------------------------------------------------------------------------------------------------|
| M0 | No evidencia de metástasis                                                                                           |
| M1 | Presencia de blastos en LCR                                                                                          |
| M2 | Nódulos macroscópicos demostrados en el espacio subaracnoideo cerebral/cerebeloso o en el III ventrículo o laterales |
| M3 | Nódulos macroscópicos en el espacio subaracnoideo espinal                                                            |
| M4 | Metástasis fuera del SNC                                                                                             |

#### I.1.d. CLASIFICACIÓN MOLECULAR DE LA WHO:

| GRUPOS                             | WNT                 | SHH                   | Grupo 3         | Grupo 4                       |
|------------------------------------|---------------------|-----------------------|-----------------|-------------------------------|
| Edad                               | Niños >3a y adultos | Todos                 | Niños >3a y <3a | Niños>3a y adultos            |
| Mts al diagnóstico                 | <5%                 | 20%                   | 40-50%          | 35-40%                        |
| Variantes somáticas más frecuentes | CTNNB1<br>DDX3X     | PTLH1<br>TERT         | SMARCA4         | KDM6A                         |
| Variantes germinales               | APC (<5%)           | PTCH1<br>SUFU<br>TP53 |                 |                               |
| Alto riesgo                        |                     | Mut TP53              | < 3años mts     | Metástasis                    |
| Bajo riesgo                        | <16 años            | <3 años               |                 | Pérdida completa cromosoma 11 |

I.1.e. **ESTRATIFICACIÓN DEL RIESGO:** Según riesgo de recurrencia (extensión de la enfermedad) y riesgo de toxicidad.

Se divide a los pacientes en 3 grupos de tratamiento:

|                                             |                                                                                                                        |
|---------------------------------------------|------------------------------------------------------------------------------------------------------------------------|
| Edad > ó igual a 3 años y riesgo intermedio | Resección total o casi total (<1,5 cm2 de tumor residual) y no evidencia de diseminación en LCR ni en RMn del neuroeje |
| Edad > o igual a 3 años y riesgo alto       | Presencia de ≥ 1,5 cm2 de tumor residual tras cirugía y/o evidencia de enfermedad diseminada o metastásica             |
| Edad < 3 años                               |                                                                                                                        |

#### I.2. TRATAMIENTO:

##### I.2.a Enfermedad localizada:

-CIRUGÍA: Máxima exéresis quirúrgica +/- derivación ventricular.

- Valoración del GRADO DE RESECCIÓN (limitada por invasión del suelo del 4º ventrículo y del tronco encefálico): Impresión del cirujano y RM a las 48-72 h postcirugía.

-RADIOTERAPIA: RTE cráneo-espinal con boost adicional en lecho tumoral. Dosis de radioterapia en función de los grupos de riesgo.

-TRATAMIENTO SISTÉMICO: Valorar individualmente en función de los grupos moleculares y de riesgo y la posible toxicidad. Se propone esquema de tratamiento más frecuentemente usado y del que disponemos de datos

publicados en un reciente estudio de 2017 (*"Multicenter pilot study of radiochemotherapy as first-line treatment for adults with medulloblastoma (NOA-07)"*. Beier et al. *Neuro-Oncology*. 20(3) 400-410, 2018).

**QUIMIO-RADIOTERAPIA:** Vincristina 1.5mg/m<sup>2</sup> (dosis máx 2mg) semanal durante la radioterapia (máximo 8 dosis).

-Indicaciones:

- Resto tumoral >1,5 cm
- Metástasis leptomeningeas ó LCR +
- Metástasis fuera del SNC
- Edad >20 años
- Histología desfavorable: anaplásico

**QUIMIOTERAPIA ADYUVANTE:** A las 6 semanas del fin de la RT.

-Esquema de Packer: Cisplatino 75mg/m<sup>2</sup> D1 + CCNU 75mg/m<sup>2</sup> D1 + Vincristina 1,5 mg/m<sup>2</sup> D1, 8 y 15 cada 6 semanas x 8 ciclos máximo.

### I.2.b. Recidivas o enfermedad metastásica difusa o diseminada

Intervalo desde platino ≥6 meses ó no QT previa:

1º LÍNEA:

-De elección: **CDDP 30mg/m<sup>2</sup> x3 + VP 16 100mg/m<sup>2</sup> x3 c/21 días x 3 ciclos**

-**Esquema PCV:** Alternativa si contraindicación a cisplatino. 1 ciclo cada 42 días x 6 ciclos máximo.

Lomustina 110mg/m<sup>2</sup> vo D1 (máx. 160mg)

Procarbina 100mg/24 h vo D8-21

Vincristina 1.5mg/m<sup>2</sup> iv D8 y 29 (máx. 2mg)

2º LÍNEAS Y SUCEASIVAS:

-CBDCA AUC 5 D1 + CTX 1000mg D1 c/21 días

-VP 16 50mg/m<sup>2</sup> vo D1-21 c/28 días

>1 intervalo desde platino <6 meses: De elección nitrosureas (BCNU, PCV o Fotemustina).

-BCNU: 200mg/m<sup>2</sup> /6-8 sem

-PCV: ver esquema arriba.

-Fotemustina: : Inducción: 80 mg/m<sup>2</sup> (Días 1, 15, 30, 45 y 60) y luego descanso de 4 semanas. Mantenimiento: 80 mg/ m<sup>2</sup> cada 4 semanas.

-TMZ 150 mg/m<sup>2</sup>/d x 5 días cada 28 días: alternativa a nitrosureas si importante toxicidad hematológica previa.

### I.3. SEGUIMIENTO:

- Anamnesis y exploración física

- Analítica sanguínea con hemograma, función renal, iones, perfil hepático
- RMI craneal y de neuroeje

Los primeros 2 años: cada 3 meses

A partir del 2º año: cada 6-12 meses

## **II. GLIOMAS**

### **II.1 RECOMENDACIONES GENERALES:**

#### **-CORTICOIDES:**

- Según síntomas (efecto masa y edema vasogénico)
- Protección gástrica
- Disminución de dosis progresiva hasta mantener mínima dosis posible y menor tiempo posible.
- Dosis diurnas
- Si dosis equivalente a >20mg/d de prednisona durante 4 semanas o más: profilaxis de pneumocistis con cotrimoxazol 800/160mg 1 comp 3 veces por semana ( si alergia, usar atovacuona, dapsona o pentamidina inhalada)

#### **-ANTIEPILÉPTICOS:**

- No se recomiendan como profilaxis de las crisis
- Evitar los inductores enzimáticos y revisar posibles interacciones con QT.
- De elección: Levetiracetam.

Preservación de la fertilidad en pacientes jóvenes con larga supervivencia esperada

La anticoagulación profiláctica puede ser usada con seguridad en pacientes en los que este indicado su uso. De elección HBPM.

Evaluación de la respuesta según criterios RANO (ver anexo al final del capítulo)

## II.2 GLIOMAS DE BAJO GRADO (difusos, grado II): ASTROCITOMA/OLIGODENDROGLIOMA

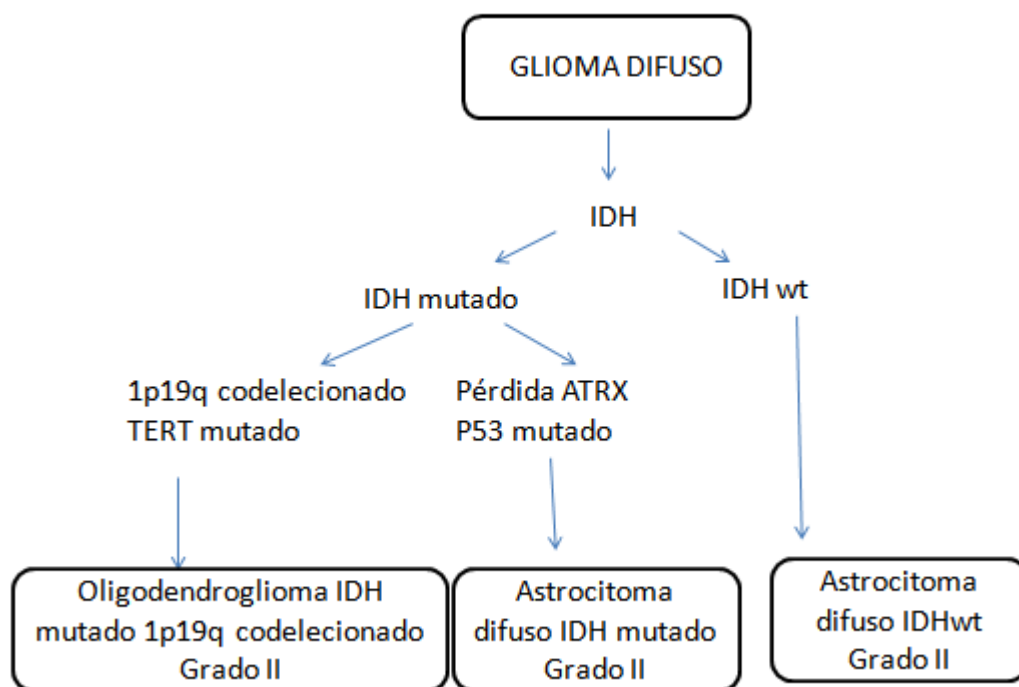

### II.2.a. DIAGNÓSTICO Y EVALUACIÓN INICIAL:

- RM craneal.
- Anamnesis y realización de MMSE y escala de Barthel
- Analítica con hemograma, función renal e iones y perfil hepático
- Determinación de mutación IDH1 y 2, codeleción 1p19q y/o ATRX

### II.2.b. TRATAMIENTO:

1. CIRUGÍA: Intentar el mayor grado de resección (relacionado con el pronóstico, mejoría de los síntomas y diagnóstico histológico más preciso): **resección total** > **subtotal** > **Biopsia**.

-Indicaciones de biopsia estereotáxica:

- Tumores profundos en los que no sea posible cirugía amplia
- Lesiones en áreas elocuentes
- Lesiones múltiples o bilaterales.
- Estimación preoperatoria de resección <50%

- **RM a las 48-72 horas** tras la cirugía en caso de resección macroscópicamente completa o parcial, para distinguir entre restos tumorales y cambios postquirúrgicos.

## 2. TRATAMIENTO ADYUVANTE:

### >FACTORES DE MAL PRONÓSTICO EN GLIOMAS DE BAJO GRADO:

- Edad  $\geq$  40 años
- Gran tamaño tumoral preoperatorio ( $>$  ó igual a 4cm)
- Resección incompleta
- Histología astrocítica
- Ausencia de codeleción 1p19q.

### Recomendación guías SEOM 2017:

-<40 años+ R0 + IDH mutado y/o 1p19q codelecionado: **observación inicial.**

->40 años ó enf residual ó variante astrocitoma: **QT y RT:**

### -Radioterapia seguida de PCV a las 4-8 semanas del fin de RT: 1 ciclo cada 42 días x 6 ciclos:

- Procarbina : 60mg/m<sup>2</sup> vo D8-21 (máx 100mg)
- Lomustina (CCNU): 110 mg/m<sup>2</sup> vo D1 (máx 160mg)
- Vincristina: 1.4mg/m<sup>2</sup> iv D8 y 29 (máx 2mg)

## II.3. GLIOMAS DE ALTO GRADO: (anaplásicos/ grado III)

### II.3.a. DIAGNÓSTICO Y EVALUACIÓN INICIAL:

- Igual que en bajo grado con las siguientes consideraciones moleculares:

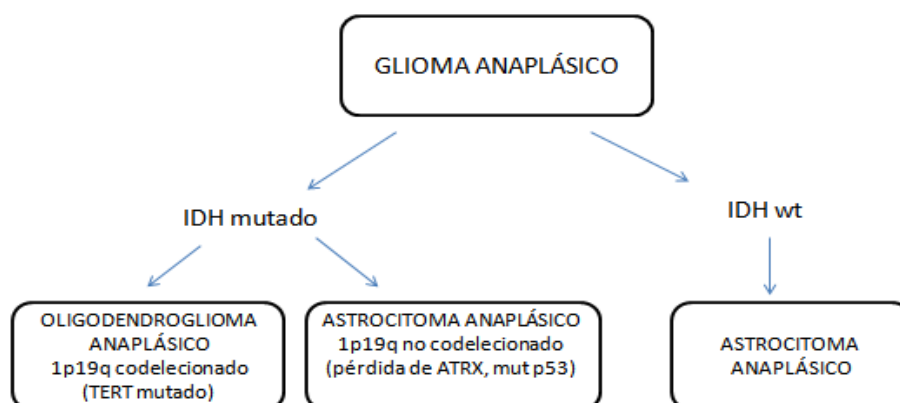

### II.3.b. TRATAMIENTO:

1.CIRUGÍA: Mismas recomendaciones que en gliomas de bajo grado (ver arriba).

## 2.TRATAMIENTO ADYUVANTE:

### A) OLIGODENDROGLIOMA ANAPLÁSICO:

- **RT seguida de PCV x 6 ciclos** (ver arriba)

- Si paciente anciano/unfit: **RT seguida de Temozolamida**: El primer ciclo, 150mg/m<sup>2</sup> D1-5 1 ciclo cada 28 días. Si buena tolerancia, a partir del segundo ciclo aumentar dosis a 200mg/m<sup>2</sup> D1-5 cada 28 días x 12 ciclos en total.

B) ASTROCITOMA ANAPLÁSICO IDH mutado ó wt:

- **RT seguida de TMZ 200mg/m<sup>2</sup> D1-5 1 ciclo cada 28 días x 12 ciclos.**

### II.3.c. TRATAMIENTO A LA PROGRESIÓN / RECIDIVA DE GLIOMAS DE BAJO / ALTO GRADO:

Valorar en comité multidisciplinar las diferentes opciones:

- Cirugía
- Reirradiación
- Tratamiento sistémico
- Tratamiento de soporte.

ESQUEMAS DE QUIMIOTERAPIA: A valorar según PS, MMSE, Barthel

1º LÍNEA:

>De elección:

- **Temozolamida** (tras PCV o si más de 6 meses de temozolamida previa)
- **PCV** (tras temozolamida)

2º LÍNEAS Y SUCESIVAS:

- **Fotemustina esquema Addeo**: Inducción: 80 mg/m<sup>2</sup> (Días 1, 15, 30, 45 y 60) y luego descanso de 4 semanas.

Mantenimiento: 80 mg/ m<sup>2</sup> cada 4 semanas

- Bevacizumab (uso compasivo si muy sintomáticos o cortico-dependientes). Se debe discutir en sesión clínica y su uso debe ser autorizado.

### II.4. GLIOBLASTOMA (grado IV)

#### II.4.a. DIAGNÓSTICO Y EVALUACIÓN INICIAL:

- RM craneal.
- Anamnesis y realización de MMSE y escala de Barthel
- Analítica con hemograma, función renal e iones y perfil hepático
- Determinar mutación IDH 1 y 2 y metilación de MGMT

#### II.4.b. TRATAMIENTO

1.CIRUGÍA: Máxima resección quirúrgica posible o biopsia.

-**RM postoperatoria a las 24-48 horas** de la intervención: extensión de la resección y como prueba de imagen basal para el seguimiento.

## 2. TRATAMIENTO ADYUVANTE:

- De elección: **RT 60 Gy + Temozolamida 75mg/m<sup>2</sup>/d, 7 días/ sem durante la RT** (aprox 6 semanas). **IMPORTANTE** PROFILAXIS ANTIEMÉTICA Y PROFILAXIS DE PNEUMOCYSTIS.

1 mes tras finalizar QTRT, completar **Temozolamida 150-200mg/m<sup>2</sup> D1-5 c/28 días x 6 ciclos**.

- Pacientes ancianos (>65-70 años), valorar **RT hipofraccionada + TMZ 75mg/m<sup>2</sup> /d seguida de TMZ 150-200mg/m<sup>2</sup> D1-5 c/28 días x 12 ciclos**.

\*En pacientes con metilación de MGMT, claro beneficio en SG con RT+TMZ

\*En pacientes sin metilación MGMT, no diferencias estadísticamente significativas entre tratamiento concomitante VS. RT sola.

- Pacientes frágiles con metilación MGMT, valorar **TMZ en monoterapia sin RT**.

## 3. TRATAMIENTO A LA PROGRESIÓN / RECIDIVA: Valorar en comité multidisciplinar.

- Descartar pseudoprogresión (más frecuente si metilación MGMT) y pseudorespuesta

### -FACTORES A CONSIDERAR:

- Tamaño
- Localización
- PS/ Barthel/ MMSE
- Necesidad de corticoides

-CIRUGÍA de rescate

-RT de rescate (si largo intervalo desde RT previa y buena respuesta)

-QUIMIOTERAPIA (si se descarta cirugía o RT de rescate)

- De elección: **Fotemustina esquema Addeo:**

Inducción: 80mg/m<sup>2</sup> D 1,15, 30, 45 y 60. Descanso de 4 semanas.

Mantenimiento: 80mg/m<sup>2</sup> cada 28 días.

- **Temozolamida** (alternativa si >4-6 meses de TMZ previa y metilación MGMT). 150-200mg/m<sup>2</sup> D1-5 c/28 días.



- **Bevacizumab** uso compasivo si muy sintomáticos / corticodependientes. Se debe discutir el caso en sesión clínica y su uso debe ser autorizado.

#### II.4.c. SEGUIMIENTO EN GLIOMAS:

- Anamnesis y exploración física incluyendo exploración neurológica
- Analítica completa con hemograma, función renal, iones y perfil hepático
- RM craneal: la primera, 1 mes tras la finalización de la RT:

>En gliomas de bajo grado, cada 3-6 meses los primeros 5 años y posteriormente de manera anual.

>En gliomas de alto grado/GB, cada 3 meses los primeros 3 años y posteriormente aumentar la frecuencia de las mismas según criterio clínico.

CRITERIOS RANO 2014 (Response-Assesment in Neuro-Oncology):

| CRITERIO               | RESPUESTA COMPLETA | RESPUESTA PARCIAL    | ENFERMEDAD ESTABLE               | PROGRESIÓN   |
|------------------------|--------------------|----------------------|----------------------------------|--------------|
| Captación de contraste | Nada               | Disminución >50%     | Disminución <50%<br>Aumento <25% | Aumento >25% |
| T2/Flair               | Estable            | Estable o disminuida | Estable o disminuida             | Aumento      |
| Lesiones nuevas        | No                 | No                   | No                               | Sí           |
| Requerimientos         | Todos              | Todos                | Todos                            | Cualquiera   |

## Cáncer de origen desconocido

### I. ESTUDIO DE EXTENSION

- **Historia clínica y exploración física completa.** Es de interés considerar la historia familiar, ser riguroso en la anamnesis y exploración física con obligada inspección metódica de la piel, localizaciones ganglionares periféricas, exploración de tiroides, mamas, inguino-escrotal, tacto rectal y completar con exploración ORL y Ginecológica
  - **Hemograma y bioquímica sanguínea completa.**
  - **CEA, AFP,  $\beta$ -HCG y PSA y CA 125 en mujeres.**
  - **Rx tórax PA y L.**
  - **TAC abdominopélvico.**
- PET la mayor recomendación para realizarlo es en pacientes con adenopatías cervicales (con células escamosas) y en situación metástasis únicas subsidiaria de tratamiento.
- **Otras exploraciones complementarias** podrían estar indicadas en relación con la clínica y tipo histológico\* (Ver anexo)
  - Es fundamental tener biopsia con suficiente material para estudio histopatológico.

Comentar SIEMPRE casos en sesión clínica. Discutir con patólogo posible etiología del tumor primario.

### II. SITUACIONES ESPECIALES DE BUEN PRONÓSTICO (suponen solo el 20 % de COD)

| Histología                                                | Características clínicas                                       | Recomendaciones                                                                                            |
|-----------------------------------------------------------|----------------------------------------------------------------|------------------------------------------------------------------------------------------------------------|
| <b>Adenocarcinoma</b>                                     | Mujer con adenopatía axilar aislada                            | Tratar como Cáncer de mama estadio II                                                                      |
|                                                           | Mujer con carcinomatosis peritoneal                            | Tratar como un cáncer de Ovario Estadio III                                                                |
|                                                           | Hombre con metástasis óseas blásticas y PSA elevado            | Tratar como cáncer de próstata avanzado                                                                    |
|                                                           | Perfil de cáncer de colon + CK20+/CK7- ó CDX2 +                | Tratar como cáncer de colon avanzado                                                                       |
| <b>Adenocarcinoma o Carcinoma pobremente diferenciado</b> | Metástasis única                                               | Tratar con tratamiento local cirugía y o Radioterapia                                                      |
| <b>Carcinoma de células escamosas</b>                     | Adenopatía cervical                                            | Tratar como Cabeza y cuello                                                                                |
|                                                           | Adenopatía inguinal                                            | Linfadenectomía inguinal+/- RT ó tratamiento radical con radioQT (como un cervix avanzado o un canal anal) |
| <b>Carcinoma pobremente diferenciado</b>                  | Varón joven con elevación de AFP o bHCG o tumor en línea media | Tratar como tumor germinal extragonadal                                                                    |
| <b>Carcinoma neuroendocrino pobremente diferenciado</b>   | Cualquier tipo de presentación                                 | Valorar tratamiento con Platino/etopósido                                                                  |

**III. RESTO DE SITUACIONES: (Tratamiento paliativo)** Son de mal pronóstico y por tanto el tratamiento paliativo, será valorado en pacientes con PS 0-1.

ENTRE LOS ESQUEMAS DE TRATAMIENTO CON QUIMIOTERAPIA :

**1º Línea (Alternativas):**

Cisplatino-Gemcitabina (75 mg/1000mg) días 1 y 8. Cada 21 días.

Carboplatino-Taxol (AUC 5/175mg/m2) cada 21 días.

**IV. ANEXO:**

Exploraciones complementarias.

- **Mamografía** en caso de adenocarcinomas y metástasis axilares en mujer.
- **Exploración ORL /Laringoscopia** en caso de adenopatías cervicales.
- **Broncoscopia** en caso de adenopatías hiliares /mediastínicas.
- **Gastroscopia:** si síntomas abdominales o sangre oculta en heces +.
- **Colonoscopia:** si síntomas abdominales, sangre oculta en heces + o biopsia con inmunohistoquímica ( CK20+/CK7-/ CDX2 +)
- **Ecografía testicular** si adenopatías/masas retroperitoneales o mediastínicas en varón.

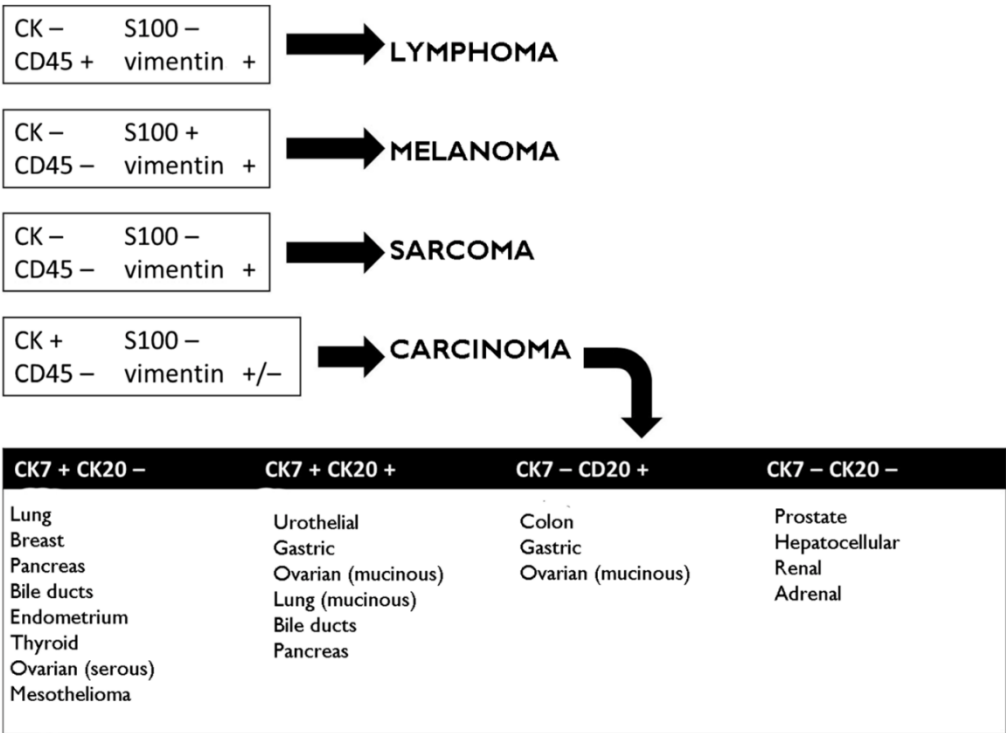

## Urgencias oncológicas

### I. URGENCIAS METABÓLICAS

#### I.1. Hipercalcemia tumoral

##### I.1.a. Definición:

- Hipercalcemia =  $\text{Ca} > 10.5\text{mg/dl}$
- Hipercalcemia grave =  $\text{Ca} > 14\text{mg/dl}$  (calcio iónico  $>1.4\text{mmol/l}$ )
- Calcio corregido (mg/dl):  $\text{calcio medido (mg/dl)} + (4 - \text{albúmina (g/dl)}) \times 0.8$
- Causa más frecuente: Metástasis óseas (menos frecuente, producción paraneoplásica de PTH o vitamina D).

##### I.1.b. Síntomas:

- Neurológicos: Astenia, hiporreflexia, letargia, coma.
- Renales: Poliuria, polidipsia, insuficiencia renal, nefrolitiasis (hipercalcemia crónica).
- Digestivos: Náuseas/vómitos, anorexia, estreñimiento (íleo paralítico), dolor abdominal.
- Cardiovasculares: HTA, Cambios ECG (acortamiento del QT a expensas de ST corto o ausente)

##### I.1.c. Pruebas complementarias:

- Analítica completa (que incluya función renal, calcio sérico, albúmina).
- ECG
- Pruebas de imagen: Descartar metástasis óseas en el caso de que no sean conocidas.

##### I.1.d. Tratamiento

Se precisa tratamiento siempre que:

- $\text{Ca} > 10.5\text{mg/dl}$  y presencia de síntomas.
- En cualquier caso, con Ca corregido  $> 13\text{mg/dl}$ , aún en ausencia de síntomas.
- HIDRATACIÓN FORZADA : SSF 500-1.000 cc en 1h y posteriormente 3-6 l/24h. Furosemida 20-40mg cada 6-8 horas. (Realizar control estricto de diuresis y en casos indicados de presión venosa central).
- BIFOSFONATOS: Ácido zolendróico 4mg en 100cc de SSF a pasar en 15 min. NO control
- Calcitonina 4-8 UI/Kg cada 6-12 h vía intramuscular o subcutánea.
- Corticoides (discutidos): 40-100 mg de prednisona al día (repartido en dos dosis).
- Denosumab 120mg vía subcutánea c/4 semanas.

En cualquier caso, es imprescindible adecuado control de iones, calcio y función renal.

En casos extremos: Plantear diálisis (siempre dependiendo del pronóstico).

#### I.2. Hiponatremia y SIADH

##### I.2.a. Criterios SIADH

- Hiponatremia ( $\text{Na plasmático} < 135\text{mEq/l}$ )
- Hipoosmolaridad plasmática ( $< 280\text{ mOsm/kg}$ )

- Na urinario alto (>20 mEq/l).
- Osmolaridad urinaria mayor que la plasmática.
- Ausencia de metástasis pulmonares, cerebrales, fármaco responsable de estos hallazgos.

### I.2.b. Síntomas

- Casos leves: ausencia o inespecíficos (anorexia, náuseas, mialgias, sintomatología neurológica, leve).
- Casos graves (instauración rápida o Na<115 mEq/l): Clínica neurológica (letargo→coma, convulsiones).

### I.2.c. Tratamiento

- Tratamiento causa desencadenante: Si paraneoplásico → Tratamiento tumor.
  - Medidas sintomáticas:
  - Restricción hídrica (500-1000cc/día).
  - Hiponatremia grave (<115 mEq/l) o síntomas graves: Reponer Na mediante suero salino hipertónico de forma lenta. Utilizar la siguiente fórmula:  
$$\text{Na a administrar (mEq)} = 0.6 \times \text{peso (kg)} \times (\text{natremia deseada} - \text{natremia actual})$$
  - Reponer la mitad en 12 h y el resto de forma más lenta.
  - Paciente cardíopata: Plantear uso de furosemida.
  - Uso de agonistas de vasopresina (tolvaptan 15mg/ 24h)

## II. URGENCIAS RESPIRATORIAS

### II.1. Síndrome de vena cava superior

#### II.1.a. Diagnóstico:

- Adecuada anamnesis y exploración física
  - \*Signo de Boterman (aumento de edema facial y cervical, cianosis y plétora al elevar los brazos por encima de la cabeza).
- Rx simple de tórax: Ensanchamiento mediastínico, derrame pleural.
- TC tórax (gold standard)

#### II.1.b. Tratamiento:

- Alivio de los síntomas:
  - Medidas generales: Limitación de fluidos, oxigenoterapia, elevación de cabecera.
  - Corticoesteroides (controvertido): Dexametasona 4mg/6-8h.
  - Furosemida 20mg/8-12h (contraindicado si hipotensión arterial, deshidratación o bajo gasto cardíaco)
- Tratamiento de la enfermedad de base:
  - Tumores altamente quimiosensibles (LNH, Ca. Microcítico de pulmón, germinales): Quimioterapia.
  - Tumores no altamente quimiosensibles: Colocación de stent endovascular o administración de radioterapia previo a la administración de quimioterapia de elección para cada tipo histológico.

## II.2. Hemoptisis

### II.2.a. Diagnóstico:

- Anamnesis y exploración física.
- Hemograma, coagulación, gasometría y electrocardiograma.
- Rx tórax.
- TC tórax.
- AngioTAC (búsqueda punto de sangrado)
- Fibrobroncoscopia (posibilidad de terapia local)

### II.2.b. Tratamiento:

- Medidas de soporte: Reposo en cama semisentado, en decúbito lateral sobre lado afecto, oxigenoterapia humidificada por mascarilla, reposición de volemia, transfusión de hemoderivados si precisa, corrección de alteraciones de la coagulación, empleo de antitusígenos, sábanas/toallas de color oscuro.
- Control del sangrado: Broncoscopia (identificar punto de sangrado y facilita abordaje control local), embolización arterial (más seguro y eficaz), cirugía (gran morbilidad), radioterapia (no inmediata, paliativo, 20-30Gy).

#### Hemoptisis masiva no controlable:

Si no control sangrado y oxigenación comprometida: Intubación traqueal (si indicado por su pronóstico oncológico). Si mal pronóstico oncológico: Sedación paliativa (mortalidad >90%).

## II.3. Hipo

### II.3.a. Tratamiento:

- Tratamiento de la causa desencadenante, si se puede identificar.
- Causa no identificada: Maniobras físicas con apnea forzada y estimulación vagal.
- Terapia farmacológica (si fallan maniobras físicas) con duración de 7-10 días.
  - o Clorpromacina 25mg/8h.
  - o Metoclopramida 10mg/8h.
  - o Baclofeno 10-25mg/8h.
  - o Haloperidol 5ml/12h
  - o Gabapentina 300mg/8h.

## II.4. Neumonitis

### II.4.a. Causa:

Efecto secundario de RT, agentes citotóxicos (busulfán, bleomicina, ciclofosfamida, taxanos), agentes de tirosin kinasa (inhibidores mTOR, EGFR-TKI, ALK-TKI, VEGFR-TKI) y más reciente y de forma relevante los anti-PD-1/PD-L1)

#### II.4.b. Diagnóstico:

- Exclusión: Diagnóstico diferencial con infección respiratoria y linfangitis respiratoria.
- Anamnesis y exploración física.
- Hemocultivos. Despistaje de virus respiratorios, Aspergillus y otros gérmenes oportunistas.
- Rx tórax.
- TAC tórax con contraste.
- Broncoscopia: Excluir infección, hemorragia alveolar difusa, diseminación linfangítica. Lavado broncoalveolar, citología.

#### II.4.c. Tratamiento:

Según grado CTCAE versión 4

- Neumonitis grado I (único hallazgo radiológico compatible, sin clínica relevante): Suspender el fármaco de forma temporal, vigilancia estrecha y descartar causa alternativa, infecciosa.
- Neumonitis grado II (síntomas leves-moderados): Suspender el fármaco de forma temporal, soporte ventilatorio, realización de broncoscopia con BAS/BAL, inicio corticoterapia a dosis altas (metilprednisolona 1-2mg/kg c/24h iv).
- Neumonía grado III/IV (síntomas graves, compromiso vital): Suspender de forma permanente el fármaco, soporte ventilatorio, aumento de dosis de metilprednisolona 2-4mg c/24h iv, realización de broncoscopia con BAS/BAL, añadir antibióticos profilácticos, para infecciones oportunistas, si no hay respuesta a corticoides añadir infliximab o micofenolato de mofetilo.

#### II.5. Derrame pleural

##### II.5.a. Diagnóstico:

- Toracocentesis: Exudado linfocitario frecuentemente hemorrágico. Diagnóstico de certeza: Hallazgo de células neoplásicas.
- Si alta sospecha (TAC, PET-TC) y líquido negativo: Valorar biopsia pleural, biopsia guiada por TC si masa de partes blandas.

##### II.5.b. Tratamiento:

- Si no relevancia clínica: Tratamiento subyacente de enfermedad neoplásica (inicio tratamiento sistémico sobre todo en linfomas, carcinoma microcítico, adenocarcinoma de ovario).
- Si sintomático: Toracocentesis evacuadora.
- Si buena expansión pulmonar tras colocación tubo de drenaje: Valorar pleurodesis (contraindicada si obstrucción endobronquial por tumor).
- Valorar catéter pleural permanente de drenaje ambulatorio en pacientes si expansión pulmonar y/o pronóstico de vida muy limitado y/o tras pleurodesis fallida.

### **III. DERRAME PERICÁRDICO**

#### **III.1. Clínica:**

Disnea de mínimos esfuerzos o en reposo. Inicio de taponamiento: Taquipnea, disnea, malestar general. Exploración: Ingurgitación yugular, elevación de la PVC, hepatomegalia, pulso paradójico. Inestabilidad hemodinámica según cantidad de líquido pericárdico y velocidad de acumulación.

#### **III.2. Diagnóstico:**

- ECG: Bajo voltaje QRS y ondas T, descenso PR, alteraciones ST-T, bloqueo de rama y alternancia eléctrica.
- Rx tórax: Cardiomegalia globular (silueta de botella de agua), halo epicárdico en Rx lateral.
- Ecocardiograma: Si es significativo hay que descartar siempre taponamiento cardiaco.  
Gradación según CTCAE:
  - Grado II: Derrame pericárdico leve asintomático.
  - Grado III: Derrame pericárdico moderado.
  - Grado IV: Derrame pericárdico con requerimiento de intervención urgente.
  - Grado V: Muerte.

#### **III.3. Tratamiento:**

##### **III.3.a. Tratamiento de soporte:**

- Aporte de volumen, contraindicados los diuréticos.
- Agentes inotrópicos.
- Casos avanzados: Evitar fármacos vasodilatadores y tratamiento anticoagulante.

##### **III.3.b. Tratamiento específico:**

- Pericardiocentesis.
- Si recurrente: Tratamiento intrapericárdico, pericardiotomía percutánea con balón o pericardiectomía (muy poco frecuente, sólo derrames muy graves con pericardiocentesis repetidas no exitosas).

### **IV. ASCITIS MALIGNA**

#### **IV.1. Diagnóstico:**

- Anamnesis y exploración física.
- Ecografía abdominal: Si exploración dudosa.
- Paracentesis diagnóstica: Estudio de líquido ascítico, citología.

#### **IV.2 Tratamiento:**

Diuréticos: Espironolactona 100-400mg/24h, furosemida 40mg/24h

(eficacia mayor en ascitis secundaria a metástasis hepáticas con HTP e hipoalbuminemia)

- Paracentesis (tratamiento de elección)
- Catéter peritoneal: Pacientes que precisan de paracentesis de repetición (>1 cada 7-15 días), tener en cuenta el pronóstico de vida.



- Si se trata de ascitis por hipertensión portal, si drenaje de líquido ascítico > 5L, valorar reponer 6-8 gr de albúmina IV por cada litro administrado.

## **V. URGENCIAS NEUROLÓGICAS**

### **V.1. Compresión medular**

- **Etiología:** Metástasis óseas (causa más frecuente), metástasis meníngeas, metástasis intramedulares, invasión directa del tumor primario.
- **Localización** (frecuencia): Columna dorsal>columna lumbar>columna cervical.
- **Principal factor pronóstico:** Estado neurológico previo al inicio del tratamiento.  
¡NECESARIO DIAGNÓSTICO PRECOZ E INSTAURACIÓN DE TRATAMIENTO LO MÁS RÁPIDO POSIBLE! (Si clínica de 24-48h puede ser reversible, >48h → prácticamente irreversible).
- **Diagnóstico:**
  - **Anamnesis:**
    - Dolor (síntoma más frecuente)
    - Sintomatología motora: debilidad de miembros inferiores, cuando progresa → alteración de la marcha e imposibilidad para mantener equilibrio.
    - Sintomatología sensitiva: Entumecimiento y parestesias ascendentes.
    - Alteraciones autonómicas: Pérdida del control de esfínteres, impotencia, retención urinaria (ancianos).
  - **Exploración física:**
    - Inicial: Espasticidad e hiperreflexia.
    - Evolucionado: Flacidez e hiporreflexia.
    - Nivel sensitivo.

| Nivel | Evaluación motora              |
|-------|--------------------------------|
| C5    | Flexores del codo              |
| C6    | Extensores de la muñeca        |
| C7    | Extensores del codo            |
| C8    | Flexores de los dedos          |
| T1    | Abductores de los dedos        |
| L2    | Flexores de la cadera          |
| L3    | Extensores de la rodilla       |
| L4    | Dorsiflexores del tobillo      |
| L5    | Extensores largo de los dedos  |
| S1    | Flexores plantares del tobillo |

- **Pruebas complementarias:**
  - Rx simple (poco sensible).
  - RM columna (ELECCIÓN).
  - TAC (Cuando RM no disponible o contraindicada).
  - Biopsia (si no hay diagnóstico oncológico).
- **Tratamiento:**
  - **Medidas generales:**
    - Dolor: Pueden ser necesarios opioides.
    - Reposo.
    - Anticoagulación profiláctica (si no contraindicación): Enoxaparina 40mg/día subcutánea.
    - Prevención estreñimiento.
  - **Corticoterapia:** Dexametasona: bolus inicial de 10-20mg IV seguido de 4-6mg/6h. Al cumplirse las primeras 24-48h de haber iniciado tratamiento IV, se puede cambiar a corticoide por vía oral.
  - **Radioterapia:** Precozmente cuando no se posible el tratamiento quirúrgico y tras la cirugía si no contraindicación. Dosis estándar: 30Gy (fraccionamiento en función de ECOG, esperanza de vida). Dosis alternativa: 8Gy en dosis única si mal pronóstico oncológico.
  - **Quimioterapia:** Debut con buen estado neurológico y tumores quimiosensibles (germinales, mieloma múltiple). Casos no subsidiarios a RT y/o cirugía.
  - **CIRUGÍA:** Tratamiento inicial de forma inmediata en aquellos casos que exista: Columna inestable, compresión por fragmento óseo, falta de diagnóstico etiológico o progresión clínica durante radioterapia.

## V.2. Metástasis cerebrales

### V.2.a. Diagnóstico:

- Anamnesis (síntomatología neurológica): Cefalea leve que va aumentando progresivamente, vómitos con o sin náuseas, mareo no vertiginoso, focalidad neurológica, convulsiones...
- Exploración física: Exploración neurológica.
- Analítica: Descartar trastornos metabólicos.
- TAC craneal c/c.
- RM craneal (elección).
- Si no hay primario conocido → Rx tórax (descartar ca. pulmón), mujeres → mamografía.

**V.2.b. Tratamiento:** Dependerá del estado general, grado de diseminación sistémica, nº y localización de las metástasis cerebrales, pronóstico oncológico del paciente.

- **Medidas generales:**
  - Elevación de la cabecera de la cama >30°.

- Restricción hídrica a < 1-1.5l/día si hipertensión intracraneal.
- Furosemida 1amp IV c/6-8h si hipertensión intracraneal.
- Anticonvulsivantes (Levetiracetam): Si crisis epilépticas, si no han presentado crisis pero las metástasis se encuentran en zonas altamente epileptógenas (corteza motora)
- **Corticoterapia:** Dexametasona en bolus de 10-16 mg seguidos de 4-6mg/6-8h durante al menos 72h, posteriormente pauta descendente (disminuir un cuarto de dosis cada 5 días)
- Si empeoramiento clínico tras inicio corticoterapia: Asociar **manitol** IV 250ml al 20% a pasar en 10 min seguidos de 125ml al 20% cada 46h en 10 min hasta un máximo de 72h (vigilar diuresis, iones, osmolaridad y función renal)
- **Radioterapia:** Según estado general del paciente, esperanza de vida y situación intelectual.
- **Radiocirugía:** Metástasis no accesibles a cirugía, < 3 lesiones < 3cm, tumores resistentes a RT estándar (tumor renal y melanoma). Tras radiocirugía, se debe administrar RT externa complementaria.
- **Cirugía:** Metástasis extirpables (3 o menos lesiones oligo o asintomáticas, localizadas en áreas accesibles) y con enfermedad sistémica limitada o controlada, o necesidad de descompresión quirúrgica. Tras cirugía se debe administrar RT externa complementaria.
- **Quimioterapia:** Tumores quimiosensibles: Mama, ca. microcítico pulmón, ovario, germinales y linfoma (complementando otros tratamientos locales como RT).

### V.3. Crisis comiciales

#### V.3.a. Diagnóstico:

- **Anamnesis y exploración física** detallada: Antecedente de diabetes, tipo y duración de la crisis, fiebre o algún signo sugestivo de infección etc.
- **Analítica:** Hemograma, glucemia, iones (Na, K, Ca, Mg), función hepática y renal.
- **Electroencefalograma.**
- **TAC c/c** (aconsejable completar con **RM craneal**).
- **Punción lumbar:** Si no se objetivan lesiones en pruebas de imagen ni alteraciones analíticas para descartar enfermedad infecciosa o carcinomatosis meníngea.

#### V.3.b. Tratamiento

- Medidas generales: Mantener vía aérea permeable (posición seguridad, Guedel...), monitorización constantes, canalizar vía periférica, corrección causa primaria si es posible, oxigenoterapia.
- Benzodiacepinas (Elección, especialmente en el estatus):  
Diazepam 0.15-0.25mg/kg IV a 5mg/min hasta máximo de 20mg dosis total. Si transcurridos 5 minutos el paciente sigue en estatus puede repetirse.
- Ácido valproico 15mg/kg a infundir en 5 min, seguido de una perfusión de 1mg/kg/hora o fenitoína 18mg/kg a 50mg/min.
- Tratamiento anticomitial de mantenimiento en pacientes con lesiones cerebrales ante dos o más crisis en un año o ante crisis única si riesgo elevado de recurrencia, o ante la gran angustia de paciente y familiares.

## **VI. URGENCIAS DIGESTIVAS**

### **VI.1. Hemorragia digestiva**

- HD Alta: Hematemesis (sangre fresca o posos de café), melenas o ambas, hematoquecia (menos frecuente).
- HD Baja: Hematoquecia, melenas (menos frecuente).

#### **VI.1.a. Diagnóstico HDA:**

- Constatación de hematemesis o melenas.
- Anamnesis, Exploración física con tacto rectal.
- Sondaje nasogástrico demostrativo, si es necesario.

#### **VI.1.b. Diagnóstico HDB:**

- Anamnesis, exploración física, exploración anal.
- Anuscopia, tacto rectal.
- Endoscopia alta para descartar HDA.
- Colonoscopia.
- (AngioTC abdominal, arteriografía mesentérica...)

#### **VI.1.c. Tratamiento**

- Canalización de 2 vías periféricas.
- Reserva de 2 concentrados de hemáties.
- Si grave: Oxigenoterapia, valorar vía central, sonda vesical, reposición volemia.
- Analítica completa con coagulación.
- Dieta absoluta y sueroterapia.
- Tratamiento con IBP (Pantoprazol): 1ª dosis: 2 amp (80mg) en 100cc de SF en 20 min, posteriormente 2 amp (80mg) en 500cc SF cada 12h las primeras 24h, 1 amp (40mg)/12h durante 3 días y posteriormente un comprimido v.o (20mg)/12h.
- Valorar SNG si hemorragia >1.500ml y si hay sangre en estómago, valorar realizar gastroscopia. SNG contraindicada en esofagitis o Sdme Mallory-Weis.
- Dieta HDA: Dieta absoluta mientras persista hemorragia, dieta líquida las primeras 24h al cese de hemorragia, dieta blanda en las 24h siguientes.
- Dieta HDB: NO es necesaria dieta absoluta, puede iniciarse en Urgencias dieta líquida y blanda a excepción de paciente hemodinámicamente inestable.

### **VI.2 Oclusión intestinal**

#### **VI.2.a. Diagnóstico:**

- Tacto rectal (descartar fecaloma, tumoración rectal).

- Rx abdomen
- TAC abdominal.

### VI.2.b. Tratamiento:

- Conservador:
  - o Dieta absoluta.
  - o Sonda nasogástrica.
  - o Hidratación y reposición hidroelectrolítica.
  - o Analgésicos opiáceos (titular en función de tratamiento previo, vía transdérmica, sc, iv incluso perfusión).
  - o Antiespasmódicos si dolor cólico (Buscapina 60-80mg/24 iv o subcutánea).
  - o Antieméticos (Haloperidol 5-15mg/24h iv o sc, clorpromacina 50-300mg/24h iv o sc).
  - o Antisecretores (Sandostatín 0.3-0.6mg/24h iv o sc).
  - o Corticoides (Dexametasona 8-10mg/24h iv).

En determinados casos de causas de obstrucción mecánica distal, se puede valorar endoprótesis autoexpandibles mediante endoscopia.

- Quirúrgico: Casos refractarios a tratamiento conservador (indicación muy cuidadosa, elevada morbimortalidad).

### VI.3. Diarrea (por quimioterapia)

| Adverse Event | 1                                                                                                | 2                                                                                                       | 3                                                                                                                                                                    | 4                                                            | 5     |
|---------------|--------------------------------------------------------------------------------------------------|---------------------------------------------------------------------------------------------------------|----------------------------------------------------------------------------------------------------------------------------------------------------------------------|--------------------------------------------------------------|-------|
| Diarrhea      | Increase of <4 stools per day over baseline; mild increase in ostomy output compared to baseline | Increase of 4 - 6 stools per day over baseline; moderate increase in ostomy output compared to baseline | Increase of >=7 stools per day over baseline; incontinence; hospitalization indicated; severe increase in ostomy output compared to baseline; limiting self care ADL | Life-threatening consequences; urgent intervention indicated | Death |

Definition: A disorder characterized by frequent and watery bowel movements.

### VI.3.a. Diagnóstico:

- Anamnesis (duración, grado (nº deposiciones diarias), productos patológicos), síntomas asociados, factores contribuyentes (dieta, fármacos (tipo de QT), factores neuroendocrinos...
- Exploración física (incluye estado de hidratación).
- Análítica completa.
- En diarrea persistente I-II se debe incluir: Estudio de sangre oculta, presencia de leucocitos, coprocultivo (Gram, toxina para Clostridium), analítica completa, exploración abdominal.
- En diarrea aguda III-IV: Además de lo previo, hemocultivos si fiebre, individualizar pruebas de imagen (Rx abdomen, TAC).

### VI.3.b. Tratamiento

- **Diarrea grado I-II (no complicada):**
  - Medidas generales: Modificaciones dietéticas, hidratación oral.
  - Loperamida: Dosis inicial de 4mg seguido de 2mg/4h o después de cada deposición (máximo 16mg/día).
- **Diarrea persistente no complicada:**
  - Medidas generales.
  - Tratamiento etiológico:  
Colitis pseudomembranosa:
    - Metronidazol 500mg/8h vo o 250mg/6h. Alternativa: vancomicina. Inicio antibioterapia oral profiláctica si no se ha iniciado previamente.
    - Fluorquinolona (Ciprofloxacino 500mg/12h v.o x 7 días).
    - Suspendir loperamida e iniciar segunda línea de tratamiento: Octeótrido 100-150µg/8h sc (25-50µg/h iv) con aumento de dosis hasta 500µg/8h.
  - Diarrea por RT: Continuar loperamida
- **Diarrea grave (III-IV):** Indicada hospitalización.
  - Medidas generales: Dieta astringente, reposición hidroelectrolítica.
  - Octeótrido 100-150µg/8h sc (25-50µg/h iv) con aumento de dosis hasta 500µg/8h o 25-50µg/h hasta control de síntomas.
  - Iniciar fluidoterapia y ATB iv (fluorquinolonas).
  - Suspendir QT hasta resolución de síntomas.

### VI.4. Colitis neutropénica

(Si afecta a ciego → Tiflitis)

#### VI.4.a. Diagnóstico:

- Anamnesis: Fiebre, distensión abdominal y dolor, se puede asociar a diarrea sanguinolenta. Aparición a los 7-14 días de administración QT (nadir).
- Rx simple de abdomen (distensión de asas, aumento densidad ciego, áreas de pneumatosis).
- Eco o TC.
- Hemocultivos (positivos para bacilos aerobios G-).
- Contraindicado pruebas invasivas (endoscopias, enema opaco).

#### VI.4.b. Tratamiento:

- Antibioterapia de amplio espectro:
  - Piperacilina/Tazobactam 4g/6h iv + metronidazol 500mg/8h iv o vo.
  - Cefepima 2g/8h + amikacina 15mg/kg/día en dosis única + metronidazol.

- Imipenem 500mg/6h iv o meropenem 1g/8h iv.
- Dieta absoluta.
- Sonda nasogástrica.
- Nutrición parenteral.
- Individualizar la necesidad de G-CSF y transfusión de hemoderivados en según hemograma.
- Valorar asociación anfotericina B por sospecha de infección fúngica.
- Se debe considerar la necesidad de intervención quirúrgica si no hay mejoría tras 24-48h de antibioterapia o signos de perforación, peritonitis o empeoramiento general.

## VII. CISTITIS HEMORRÁGICA

**VII.1 Profilaxis:** Hidratación abundante antes y 24-48h después de la infusión, + MESNA (20% dosis de Ifofosfamida 15 min antes, y el resto a las 4 y 8h de finalizar)

### VII.2. Tratamiento:

- Interrupción de la administración del agente causante.
- Mantener o aumentar el ritmo de hidratación (al menos 3.000 cc/24 h).
- Administración de analgésicos: espasmolíticos y, si es necesario, analgésicos opioides.
- Soporte transfusional, debiendo mantener cifras de plaquetas por encima de 50.000/mm<sup>3</sup>.
- Suspensión de todo fármaco anticoagulante, antiplaquetario y del tratamiento quimioterápico.
- Antibioterapia empírica, siempre que se sospeche infección (aminoglucósido más ampicilina o cefalosporina de tercera generación) hasta que sea confirmada por cultivo.

## VIII. REACCIÓN DE HIPERSENSIBILIDAD

### VIII.1. GRADACIÓN SEGÚN CTCAE 4.1. Grados de hipersensibilidad

| GRADO | DESCRIPCIÓN                                                       | TRATAMIENTO                                                                                                       |
|-------|-------------------------------------------------------------------|-------------------------------------------------------------------------------------------------------------------|
| I     | Enrojecimiento transitorio, temperatura < 38°C                    | Se puede continuar con el tratamiento sin cambios tras suspenderlo momentáneamente y administrando medicación IV. |
| II    | Rash, enrojecimiento, urticaria, disnea, fiebre >38°C.            |                                                                                                                   |
| III   | Broncospasmo sintomático, urticaria/edema, angioedema/hipotensión | Aplicar protocolos de sensibilización (aumento de la medicación y disminución de la velocidad).                   |
| IV    | Anafilaxia                                                        | Aplicar protocolos de desensibilización, si fuera necesario ingresar al paciente en UCI.                          |
| V     | Muerte                                                            | Suspender/cambiar el tratamiento.                                                                                 |

#### VIII.1.a. Hipersensibilidad leve:

- Antihistamínico no sedante: Cetirizina 10mg/día, levocetiricina 5mg/día, ebastina 10-20mg/día, loratadina 10mg/día, rupatadina 10mg/día.

- Si existe mucho prurito o componente ansioso añadir anti-H1 sedante: Hidroxicina 25-75 mg/día (Atarax®) o dextroclorferniramina 6-12mg/día (Polaramine®), preferiblemente pauta nocturna. Añadir corticoides en pauta descendente rápida si urticaria de 2-3 días de evolución o angioedema acompañante.

#### **VIII.1.b. Hipersensibilidad moderada (grado 2):**

- Suspender tratamiento quimioterápico.
- Polaramine® 1-2 ampollas de 5mg IM o IV, se pueden repetir dosis cada 4-6h, dosis máxima: 4 ampollas al día.
- Corticoides: Hidrocortisona (Actocortina®) 100mg, 1-2 amp IM o IV muy lenta (diluida en 100ml de SSF), Metilprednisolona (Urbason®) dosis de 60-100mg iv o im en 24h en 3-4 dosis/día. En casos extremos se puede utilizar hasta 250-500mg en bolus.  
En caso de instaurar tratamiento de mantenimiento, 0.5-2mg/kg/día durante un período de 4 días, sin que sea necesario pauta descendente.
- B- Adrenérgicos (salbutamol) inhalados, nebulizados o sc si persiste broncospasmo y no ha cedido con adrenalina.

#### **VIII.1.c. Hipersensibilidad grave (grado 3/4):**

- Suspender tratamiento quimioterápico.
- Añadir adrenalina IM (1/1.000) de entrada, 0-5ml (media ampolla) y si el paciente no responde, se puede repetir 2-3 veces a intervalos de 5-15min.
- Ante un cuadro grave (shock anafiláctico): Adrenalina (1/100.000) IV en 100ml de SSF (0.01mg/ml). Iniciar con 0.5-1ml/Kg/h (30-100ml/h en adultos) en función de la gravedad del cuadro con monitorización estricta del paciente.
- Polaramine® 1-2 ampollas de 5mg IM o IV, se pueden repetir dosis cada 4-6h, dosis máxima: 4 ampollas al día.
- Corticoides: Hidrocortisona (Actocortina®) 100mg, 1-2 amp IM o IV muy lenta (diluida en 100ml de SSF), Metilprednisolona (Urbason®) dosis de 60-100mg iv o im en 24h en 3-4 dosis/día. En casos extremos se puede utilizar hasta 250-500mg en bolus.  
En caso de instaurar tratamiento de mantenimiento, 0.5-2mg/kg/día durante un período de 4 días, sin que sea necesario pauta descendente.
- B- Adrenérgicos (salbutamol) inhalados, nebulizados o sc si persiste broncospasmo y no ha cedido con adrenalina.



## Cáncer de tiroides

### I. DIAGNÓSTICO

- Anamnesis y exploración física
- Eco cervical
- Analítica completa que incluya TSH, tiroglobulina y antitiroglobulinas.
- TC/RM cervical.
- Rastreo corporal con Iodo para tumores diferenciados (papilar y folicular)
- Niveles de CEA y Calcitonina para carcinoma medular.
- Mutaciones en RET para Medular de Tiroides y en línea Germinal (Descartar MEN2 y feocromocitoma).
- Si Calcitonina > 500 en carcinoma medular realizar estudio de extensión: TC (Cervico-torax y abdomen superior) y Gammagrafía.
- PAN-TC (Cráneo, cuello, tórax abdomen y pelvis ) ó PET en anapláscios

**El tratamiento y seguimiento de la enfermedad localizada será llevada a cabo por cirugía y endocrinología.**

**El tratamiento y seguimiento de la enfermedad avanzada I<sup>131</sup> sensible será llevada a cabo y manejada por endocrinología.**

### II. TERAPIAS SISTÉMICAS:

#### **II.1. CARCINOMA DIFERENCIADO DE TIROIDES**

Indicadas en pacientes I<sup>131</sup> refractarios, no candidatos a cirugía ni radioterapia (Ver anexo):

Mantener Niveles de TSH < 0,1 (Dosis aproximada 1,6 mcg/kg/día)

Plantear seguimiento estrecho en determinados pacientes (Anexo).

1º Línea: Lenvatinib 24 mg/24 h continuo ó Sorafenib 400 mg/12 h continuo. (A valorar en función de la comorbilidad del paciente)

2º Línea: Lenvatinib 24 mg/24 h continuo (Si no se usó en primera línea)

#### **II.2. CARCINOMA MEDULAR DE TIROIDES**

No es efectivo ni la ablación con yodo ni la supresión con TSH.

1º Línea: Vandetanib 300 mg cada 24 horas continuo.

2º Línea: Cabozantinib 60 mg cada 24 horas continuo (Aprobado y con precio pero NO financiado). No se utilizará hasta que se disponga de nueva evaluación de financiación.

### II.3. CARCINOMA ANAPLÁSICO DE TIROIDES

-Si es localmente resecable, seguir el circuito del carcinoma diferenciado de tiroides. En márgenes afectos: Valorar quimiorradioterapia.

-Si es Irresecable:

-Valorar: radioterapia ± quimioterapia (adriamicina, docetaxel paclitaxel y cisplatino son los agentes más usados, aunque ningún estudio los ha comparado).

-Dada la extrema agresividad valorar QUIMIOTERAPIA de entrada.

-Esquemas de quimioterapia:

**-Doxorrubicina 60 mg/m<sup>2</sup> cada 21 días**

Otros:

-Paclitaxel/Carboplatino 175 mg/m<sup>2</sup>/AUC5.

-Paclitaxel 80 mg/m<sup>2</sup> 1,8,15 cada 28 días.

-Cisplatino 100 mg/m<sup>2</sup> cada 21 días.

### Seguimiento

- **1º Año (cada 6 meses):**

Eco cervical

TSH

Tiroglobulina y antitiroglobulina. Plantear realizar rastreo de TSH

- **Siguientes (Anual):**

Eco cervical TSH, Tiroglobulina y antitiroglobulina

### III. ANEXO:

1º Criterios de refractariedad a radioyodo (ATA 2015):

- El tejido neoplásico no concentra <sup>131</sup>I
- El tumor ha perdido la capacidad de captar <sup>131</sup>I, cuando previamente sí captaba
- <sup>131</sup>I es captado por unas lesiones y por otras no
- La enfermedad progresa a pesar del tratamiento con <sup>131</sup>I

2º Criterios de seguimiento activo:

Tumores < de 2 cm con crecimiento anual < 20% y asintomáticos.

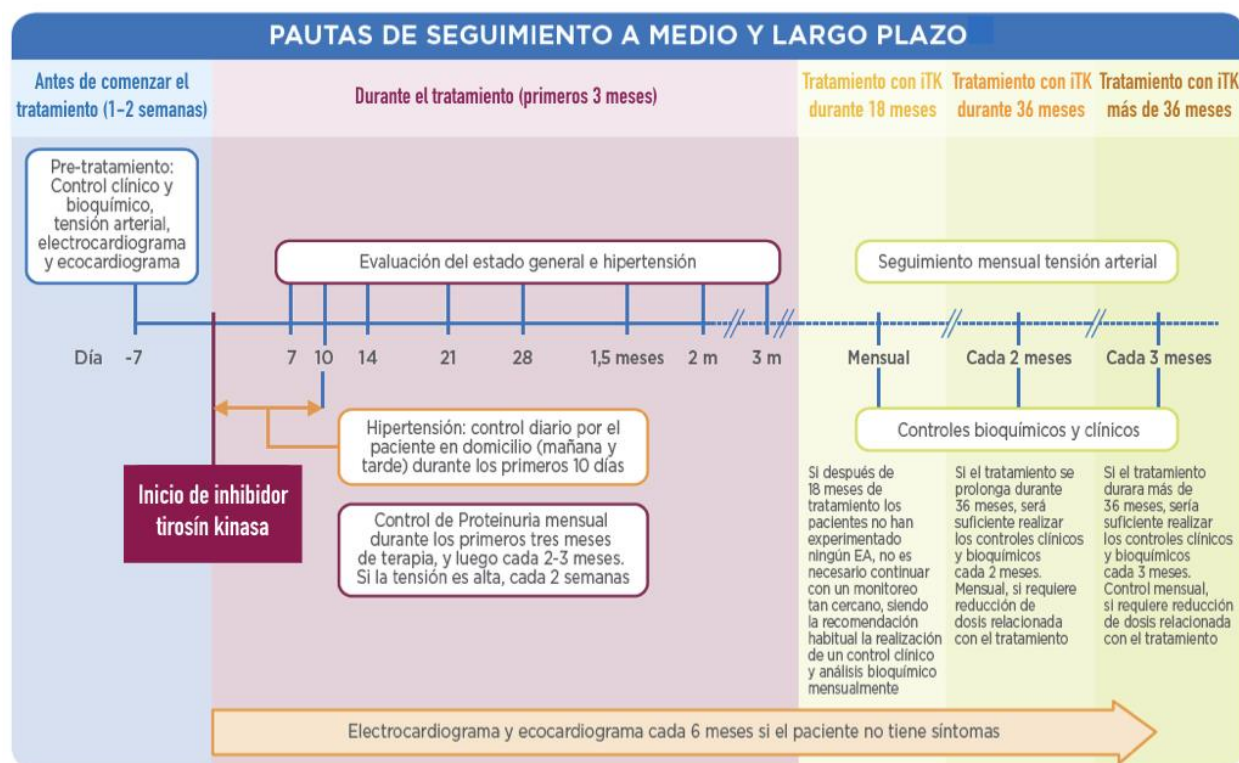

## Fiebre en el paciente oncológico

### PREVENCIÓN PRIMARIA

**Cribado de infecciones crónicas o latentes** que puedan reactivarse en caso de inmunosupresión. En casos indicados según el tratamiento y el riesgo de inmunosupresión específico de cada paciente oncológico:

#### I. SEROLOGÍA BASAL PARA VHA, VHB Y VHC

**VHB.** Para su cribado se precisa detección de antígeno de superficie (HBsAg) + anticuerpo del núcleo de la hepatitis B (anti-HBc) + anticuerpo de superficie de la hepatitis B (anti-HBs).

| HbsAg | Anti-HBc IgG | Anti-HBc IgM | Anti-HBs (IgM/IgG) | HBeAg | HBV DNA (carga viral) | Fase de la infección y pauta a seguir                                                                |
|-------|--------------|--------------|--------------------|-------|-----------------------|------------------------------------------------------------------------------------------------------|
| -     | -            | -            | -                  | -     | -                     | No infección ni inmunización:<br><b>VACUNACION</b>                                                   |
| -     | -            | -            | ++                 | -     | -                     | Correctamente vacunado                                                                               |
| +     | +++          | +/-          | -                  | +     | +                     | Hepatitis B crónica replicativa<br><b>TRATAMIENTO ANTIVIRAL</b>                                      |
| +     | +++          | -            | -                  | -     | -                     | Ac anti-HBe +: hepatitis B crónica no replicativa (portadores asintomáticos)<br><b>PROFILAXIS</b>    |
| +     | +++          | -            | -                  | -     | -                     | Ac anti-HBe -: Portador inactivo (sano)<br><b>PROFILAXIS</b>                                         |
| +     | +            | +            | -                  | +     | +                     | Hepatitis B aguda                                                                                    |
| -     | +            | -            | +                  | -     | -                     | Hepatitis B resuelta                                                                                 |
| -     | +++          | +/-          | -                  | -     | +                     | Infección oculta latente<br><b>PROFILAXIS</b>                                                        |
| -     | +++          | +/-          | -                  | -     | -                     | <b>Comprobar periódicamente la posibilidad de reactivación durante el tratamiento inmunosupresor</b> |

#### II. SEROLOGÍA HIV Y SUBPOBLACIONES LINFOCITARIAS.

#### III. DESPISTAJE TBC LATENTE en

- Todo paciente con antecedentes dudosos
- Situaciones sociales de riesgo: alcohólicos, adictos a drogas por vía parenteral, infección por VIH.
- Sospecha clínica o radiológica
- Contacto con enfermo bacilífero (tuberculosis pulmonar o laríngea)
- Pertenecientes a poblaciones de riesgo
  - o Institucionalizados
  - o Extranjeros de zonas geográficas de alta endemicidad tuberculosa: Asia, Oriente Medio, África, Latinoamérica, Europa del este, Rusia.

- Residentes o empleados de prisiones
- Casas de acogida para población marginal

**MÉTODO: Mantoux (PDD) +/- cuantificación de interferón gamma (IGRA).** De realizarse las dos técnicas de forma simultánea, teniendo en cuenta que la IGRA debe realizarse en primer lugar inmediatamente antes para evitar el efecto “*booster*” o de potenciación, causado por la PDD.

Se considera Mantoux (PPD) positivo si:

- Induración  $\geq 5$  mm a las 72 horas y:
  - Sospecha clínica o radiológica (*lesiones fibronodulares apicales, engrosamiento pleural, etc.*) de TBC
  - Contacto íntimo con caso índice o sospechoso de enfermedad tuberculosa activa bacilífera.
  - Inmunodepresión o infección por VIH
  - Seroconversión de mantoux previamente negativo.
- Induración  $\geq 10$  mm a las 72 horas: cualquier otro caso, independientemente de antecedente de vacunación con BCG.

**IMPORTANTE:** Un mantoux negativo no excluye una infección tuberculosa latente ni enfermedad tuberculosa.

1. PDD positiva en pacientes sin factores de riesgo, que han recibido la vacuna con BCG o en contacto de baja prioridad, realizar **cuantificación de interferón gamma (IGRA; QuantiFERON®-TB-Gold)**:
  - IGRA positivo = Infección
  - IGRA negativo = Se descarta.
2. PDD negativa en pacientes con factores de riesgo, inmunodeprimidos o contactos de alta prioridad, repetir en 2 semanas (*efecto booster*); si continúa siendo negativa, realizar **cuantificación de interferón gamma (IGRA)**:
  - IGRA positivo = Infección
  - IGRA negativo = Se descarta.

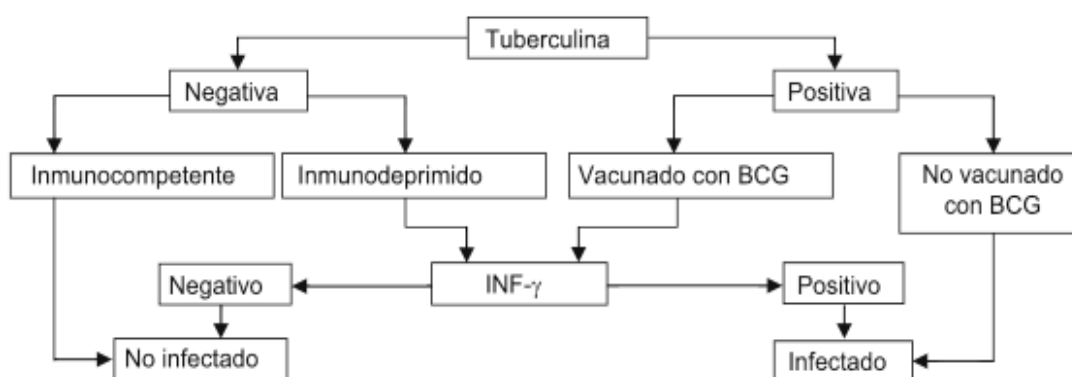

*Algoritmo de utilización conjunta de PDD y de las técnicas IGRA para el diagnóstico de la infección tuberculosa.*

El diagnóstico de la **infección de tuberculosis latente** se hace si la persona tiene un resultado positivo en la prueba de detección de la tuberculosis (PDD y/o IGRA) y la evaluación médica no indica enfermedad de tuberculosis. Con respecto a evaluación médica nos referimos a: historia clínica, exploración física, radiografía de tórax anodina y microbiología diagnóstica que descarte enfermedad activa (ausencia de *BAAR* al microscopio con tinciones de *Ziehl-*

*Neelsen o auramina*, y cultivo negativo). De lo contrario, se tratará de una enfermedad tuberculosa activa y no hablaremos de profilaxis, sino de tratamiento.

**PROFILAXIS:** La pauta de elección para el tratamiento de la infección tuberculosa latente es isoniazida (INH) (5 mg/kg/día hasta un máximo de 300 mg diarios) con suplementos de vitamina B6, durante 9 meses. En pacientes con infección por VIH, así como en sujetos inmunodeprimidos y aquellos con lesiones fibróticas residuales en la radiografía de tórax (que pueden sugerir secuelas de una enfermedad tuberculosa previa mal curada) se recomienda prolongar su duración hasta los 12 meses. Hay que tener presente la posibilidad de hepatotoxicidad por INH, por lo que se recomienda monitorizar las ez. hepáticas y suspender la profilaxis si estas se elevan 3 xLSN y el paciente tiene síntomas de hepatopatía o si se elevan 5 xLSN en pacientes asintomáticos. Otras alternativas de profilaxis incluyen rifampicina (RF) (10 mg/kg/día con un máximo 600 mg/día) durante 4 meses, especialmente en pacientes que sean intolerantes a la INH (clínica o por toxicidad hepática) o casos índices con cepas resistentes a la INH.

Se debería iniciar 1 mes antes al inicio del tratamiento sistémico oncológico. La profilaxis está indicada (siempre valorando riesgo/beneficio y actitud del tratamiento oncológico) en:

#### INDICACIONES ABSOLUTAS

- Conversores recientes (positivización de la PDD en los últimos 2 años)
- Infectados por VIH con PDD/IGRA positiva, así como aquellos con una PDD negativa sin posibilidad de realización de IGRA y que hayan estado en contacto con pacientes con enfermedad tuberculosa activa (bacilíferos).
- Portadores de lesiones fibróticas estables en la radiografía de tórax con una PDD y/o IGRA positivas.
- Pacientes con PDD/IGRA positivas y contactos íntimos con un paciente bacilífero.

#### INDICACIONES RELATIVAS

- Pacientes con PDD/IGRA positivas y enfermedades debilitantes: alcoholismo crónico, ERC, neoplasias sólidas o hematológicas que vayan a recibir tratamiento, usuarios de drogas por vía parenteral, desnutrición severa.
- PDD/IGRA positiva y situación de riesgo social.
- PDD/IGRA positiva y corticoterapia crónica.

#### IV. VACUNACIÓN, CON VACUNAS INACTIVADAS.

Entre las recomendadas tenemos:

- Vacunación antigripal anual en pacientes con tumores sólidos activos y en curso de tratamiento de quimioterapia. Se puede administrar en cualquier momento, sin riesgos para el paciente (incluso durante el tratamiento de quimioterapia).
- Vacunación frente a neumococo = 1ª dosis (*Prevenar13*) al diagnóstico antes de iniciar tratamiento sistémico, posteriormente 1 dosis de *Prevenar23* a las 8 semanas. Respecto a *Prevenar13*, **se recomienda su administración al menos 2 semanas antes** del inicio del tratamiento.

- Vacunación para VHB en pacientes no inmunizados (tras estudio serológico) = 3 días, (primera dosis en el mes 0, segunda al 3º mes y tercera al 6º mes). **Se recomienda su administración al menos 2 semanas antes** del inicio del tratamiento.

#### **V. INFECCIONES TRAS PROCEDIMIENTOS ENDOSCÓPICOS.**

Generalmente, no se recomienda la administración de antibióticos profilácticos antes de un procedimiento endoscópico para evitar el desarrollo de endocarditis bacteriana

- **CPRE/CPH y drenaje biliar E-I:** Se debe considerar la administración de antibioterapia profiláctica para la cobertura de *bacilos entéricos gram-negativos y enterococos* en pacientes con obstrucción en los que exista la posibilidad de no conseguir un drenaje completo de la vía biliar. Si el procedimiento no logra resolver la obstrucción, se aconseja mantener el antibiótico.

#### **VI. INFECCIÓN POR P. JIROVECI.**

Considerar la profilaxis frente a *Pneumocystis jiroveci* (P. jiroveci) en aquellos pacientes que van a recibir:

- Temozolamida + RT
- Fármacos que produzcan linfopenia T profunda.
- Tratamiento con esteroides en dosis equivalente a  $\geq 20$  mg/día de prednisona durante 4 semanas o más.

La pauta de elección es **cotrimoxazol 800/160 mg**, un comprimido 3 veces por semana o bien 400/80 mg 1 comp/día. En caso de alergia, se puede usar atovaquona (1,5 g/día), dapsona (100 mg/día) o pentamidina inhalada (300 mg, 4 veces por semana o iv mensual). Se debe mantener la profilaxis al menos mientras dure el tratamiento quimioterápico y uso de corticoide, valorando riesgo/beneficio de su prolongación por al menos 2 meses tras el fin de esta o hasta que la cifra de linfocitos CD4 esté por encima de 200 U/mm<sup>3</sup>.

#### **VII. PREVENCIÓN CON G-CSF.**

Realizar una estimación del riesgo de neutropenia febril (NF) antes del inicio de la quimioterapia. Se recomienda el uso profiláctico de G-CSF en aquellos pacientes con un riesgo estimado de NF superior al 20%. Si el riesgo estimado se encuentra entre 10-20%, valoración individualizada planteando G-CSF cuando:

- Intención de tratamiento CURATIVO (con el fin de evitar retrasos y reducciones de dosis)
- Pacientes de alto riesgo:  $\geq 65$  años, episodios previos de NF, afectación extensa de MO, cirugía mayor reciente.

En caso de presentar neutropenia y el paciente se encuentra afebril, no se han demostrado beneficio clínico con la administración de G-CSF en estos pacientes, por lo que no se recomienda su empleo.

## Manejo de la neutropenia febril

### I. DEFINICIÓN:

Temperatura oral  $> 38^{\circ}\text{C}$  durante  $> 1$  H o una determinación aislada  $> 38,3^{\circ}\text{C}$  cuando neutrófilos  $< 500/\text{mm}^3$  o  $< 1.000/\text{mm}^3$  si se espera que desciendan por debajo de  $500/\text{mm}^3$  en las siguientes 24-48 horas.

### II. DIAGNÓSTICO:

- **Laboratorio:** hemograma con formula leucocitaria, bioquímica completa y coagulación.
- **Hemocultivos:** tres sets (1 set bote aerobio y otro bote anaerobio), uno de ellos de catéter venoso central si presenta (hemocultivos diferenciales), y dos de vía periférica.
- **Cultivos específicos:** según signos y síntomas.
- **Pruebas de imagen:** básico realizar una radiografía de tórax, aunque no presente sintomatología respiratoria.

### III. EVALUACIÓN DEL RIESGO Y TRATAMIENTO EN FUNCIÓN DEL MISMO:

**III.1. MASCC** (*Multinational Association of Supportive Care in Cancer*): Aunque es la herramienta pronóstica con mayor grado de validación, no es la más específica para pacientes con tumores sólidos, y puede infraestimar el riesgo hasta un 9-15% para pacientes ambulatorios.

| Característica                                                      | Puntuación |
|---------------------------------------------------------------------|------------|
| Severidad de la enfermedad                                          |            |
| • Ausencia de síntomas o síntomas leves                             | 5          |
| • Síntomas moderados                                                | 3          |
| Ausencia de hipotensión                                             | 5          |
| Ausencia de EPOC                                                    | 4          |
| Tumor sólido o ausencia de infección micótica en tumor hematológico | 4          |
| Paciente ambulatorio al inicio de la fiebre                         | 3          |
| Ausencia de deshidratación                                          | 3          |
| Edad $< 60$ años                                                    | 2          |

\* Valor máximo de 26.

**III.2. Escala CISNE** (*Clinical Index of Stable Febrile Neutropenia*). Incluye 6 predictores asociados de forma independiente con la incidencia de complicaciones graves. La finalidad última de este índice es prevenir el alta precoz a los pacientes que, a pesar de su aparente estabilidad clínica y bajo riesgo por MASCC, tienen un riesgo alto de complicaciones por presentar  $\geq 3$  puntos.



| Característica                            | Puntuación |
|-------------------------------------------|------------|
| PS $\geq 2$                               | 2          |
| Bronquitis crónica                        | 1          |
| Enfermedad cardiovascular                 | 1          |
| Monocitos $< 200/\text{mm}^3$             | 1          |
| Mucositis grado $\geq 2$ (CTCAE v.4 /NCI) | 1          |
| Hiper glucemia inducida por estrés        | 2          |

\* Riesgo bajo = 0 puntos, riesgo medio = 1-2 puntos, riesgo alto =  $\geq 3$  puntos.

### III.2.a. BAJO RIESGO

(MASCC  $> 21$ ; CISNE 0-2): Estabilidad hemodinámica, neutropenia con duración esperada  $< 7$  días, ausencia de

1) comorbilidad relevante y

2) insuficiencia hepática/renal, fiebre de inicio extrahospitalario, buen apoyo socio-familiar con cercanía al hospital y adecuada ingesta oral por ausencia de *dolor abdominal, náuseas/vómitos, mucositis  $\geq G2$  y/o diarrea*.

- El **tratamiento antibiótico empírico debe iniciarse lo antes posible**, debiendo administrarse la primera dosis en el hospital dentro de la primera hora tras el triaje. Los pacientes de bajo riesgo son candidatos a tratamiento ambulatorio. La combinación más usada es:
  - **Amoxicilina-clavulánico** 875-125 mg cada 8 horas + **Ciprofloxacino** 500 mg cada 12 horas, ambos vía oral.
  - Para *alérgicos a b-lactámicos*: **ciprofloxacino** 500 mg cada 12 horas + **clindamicina** 600 mg cada 8 horas (de elección) ó **moxifloxacino** 400 mg/24 horas (*opción controvertida, no cubriríamos enterobacterias y bacilos gram negativos fermentadores entre los que se encuentra la Pseudomona*).
- **IMPORTANTE:** Los pacientes que están recibiendo profilaxis con fluoroquinolonas por cualquier causa no deben recibir tratamiento empírico con estos antibióticos por el riesgo de que la infección sea causada por bacterias que se hayan hecho resistentes a los mismos.
- En cualquiera de las situaciones, es muy importante revisar la microbiología previa (de existir) para adaptar el tratamiento empírico.
- Se deben recoger hemocultivos (si el paciente es portador de catéter central, por ej. port-a-cath, hacer una de las extracciones a través del catéter para poder hacer hemocultivos diferenciales), así como muestras de posibles focos de infección en función de los datos clínicos.
- Si aparece un empeoramiento clínico a las 48-72 horas, se debe valorar la realización de nuevas pruebas diagnósticas y el ingreso hospitalario para tratamiento antibiótico intravenoso.

### III.2.b. ALTO RIESGO

(MASCC  $< 21$ , CISNE  $\geq 3$ ): inestabilidad hemodinámica, neutropenia  $< 100 \text{ cel}/\text{mm}^3$  con duración esperada  $> 7$  días, comorbilidades asociadas, neumonía, infección piel y partes blandas, sospecha de infección de catéter central,

sepsis, fiebre de inicio en ámbito hospitalario, sintomatología digestiva que impida la correcta ingesta, escaso/ausente soporte socio-familiar unido a lejanía respecto a centro hospitalario.

- La **rapidez en la instauración del tratamiento antibiótico empírico es mandatoria**: idealmente en la 1ª hora, máximo 6 horas.
- En cualquiera de las situaciones, es muy importante revisar la microbiología previa (de existir) para adaptar el tratamiento empírico.
- Ingreso hospitalario y tratamiento antibiótico intravenoso. A iniciar un régimen empírico en monoterapia con:
  - **Piperacilina-Tazobactam** 4-0,5 g /8 h
  - **Cefepime** 2 g/8 h
  - **Meropenem** 1 g/8 h de elección si riesgo de BLEE.
  - *Para alérgicos*:
    - **Aztreonam** 2 gr/8 h +/- **amikazina** 20 mg/kg/día (de elección).
    - **Tigeciclina** 500 mg cada 12 horas: si el foco que se sospecha es intraabdominal o a nivel de piel y partes blandas, no indicado su uso cuando el foco de sospecha es urinario.
- La terapia en combinación con otros fármacos (*aminoglicósidos, quinolonas, glicopéptidos, linezolid*) debe emplearse para pacientes que se presenten con complicaciones asociadas y/o con sospecha de patógenos resistentes (*Staph. Aureus* resistente a meticilina (SAMR), bacilos gram negativos productores de BLEE (*criterios de riesgo en anexo 1*), enterococo vancomicina-resistentes (VRE), etc...). El tratamiento empírico con ellos debe ser suspendido tras 48-72 horas si no se aíslan patógenos resistentes en los cultivos correspondientes y el paciente experimenta una evolución favorable y permanece estable hemodinámicamente, manteniendo la monoterapia con el betalactámico.
  - Añadir **GLICOPEPTIDO** (*vancomicina, daptomicina*) ó **LINEZOLID** al tratamiento empírico cuando:
    - Inestabilidad hemodinámica, sepsis y/o shock séptico.
    - Foco infeccioso:
      - Neumonía
      - Infección de piel y partes blandas
      - Sospecha de infección asociada a catéter central
    - Profilaxis reciente con fluoroquinolonas.
    - Mucositis severa
    - Colonización o antecedentes de infección microbiológicamente documentada por *Staph. Aureus* resistente a meticilina (SAMR), enterococo vancomicina-resistentes (VRE) y *Streptococcus del grupo viridans*.
    - Hemocultivo positivo para cocos gram-positivo (a la espera de antibiograma).

**IMPORTANTE:** El Aislamiento de *Staph. Aureus* o *Streptococcus spp* obliga a la realización de un ecocardiograma (ET) transtorácico y si este negativo y la sospecha de endocarditis es elevada ET transesofágico.

#### POSOLOGÍAS:

- Vancomicina 1g /12 h iv
- Linezolid 600 mg/12 h iv (+++ si foco neumónico)
- Daptomicina 6-10mg/kg/24 h iv (+++ si alergia a vancomicina, creatinina  $\geq 2$  mg/ml, VRE y en bacteriemia; no indicado si foco neumónico)

Añadir **AMINOGLUCOSIDO** (*amikacina, gentamicina*) cuando:

- Inestabilidad hemodinámica, sepsis y/o shock séptico: emplear en combinación con el aminoglucósido meropenem 1gr/8 horas en perfusión extendida.
- Sospecha de gram-negativo multiresistente (por aislamiento previo o por características basales del paciente que favorezcan infección por este tipo de patógenos).

#### POSOLOGÍA

- Amikacina 20 mg/kg/24 horas.
- Gentamicina 5 mg/kg cada 24 horas.

Añadir **soporte con G-CSF** en:

- Neutropenia intensa (< 100) y prolongada (> 7 días)
- Criterios de sepsis/shock séptico
- Neumonía
- Sinusitis
- Celulitis graves
- Infección fúngica diseminada
- Infección microbiológicamente documentada que no responde al tratamiento antibiótico apropiado

#### IV. SITUACIONES ESPECIALES:

##### **IV.1. FIEBRE Y NEUTROPENIA DE ALTO RIESGO SIN FOCO CLÍNICO/RADIOLOGICO**

- Hemocultivos seriados (al menos 2 sets de hemocultivos) y diferenciales si portador de catéter central.
- Cultivo de cualquier área sospechosa (*boca, orina, heces, exudados...*) si síntomas.
- Sospechar siempre una bacteriemia relacionada con catéter/reservorio ante una fiebre de reciente aparición sin foco aparente y paciente portador de catéter.

##### **IV.2. FIEBRE Y NEUTROPENIA DE ALTO RIESGO CON FOCO de SOSPECHA CLINICO/RADIOLÓGICO**

- **Orofaringea** = Cultivo y biopsia de lesiones sospechosas. Considerar antibioterapia con fármacos que cubran anaerobios y antifúngicos.
- **Esofágico** = Cultivo (herpes, candida, citomegalovirus (CMV)...) en paciente de alto riesgo/inestable y valorar repetir EDA si no respuesta. El régimen de tratamiento empírico inicial debe incluir antifúngicos y antivirales (*dosis y principales fármacos en anexo 2*).

- **Senos** = TC/RM, evaluación oftalmológica y cultivos. En el régimen de tratamiento antibiótico debe incluirse vancomicina si celulitis periorbitaria y anfotericina B liposomal 3 mg/kg/24 horas si sospecha de aspergillosis/mucormicosis en pacientes de riesgo o foco clínico presente.
- **Abdominal** = Ecografía y/o TC, toma de cultivos. En el régimen de tratamiento se deben cubrir anaerobios y añadir metronidazol o vancomicina (ambos orales) si sospecha de *Clostridium Difficile*.
  - o De elección:
    - Cefepime 2 gr/8 horas iv + Metronidazol 500 mg/8 horas iv (*oral si sospecha de Clostridium*)
    - Cefepime 2 gr/8 horas iv + Vancomicina 1 gr/12 horas iv (*oral si sospecha de Clostridium*)
    - Piperacilina/Tazobactam 4 gr/8 horas iv.
  - o Si sospecha/confirmación de infección fúngica: Equinocandina/ Anfotericina B liposomal 3 mg/kg/24
- **Perirrectal** = Inspección estando contraindicado el tacto/masaje rectal, y a considerar TC/RM para valorar alcance del absceso y posibilidad de tratamiento quirúrgico si no buena evolución clínica. En el régimen de tratamiento se deben cubrir anaerobios y enterococos.
- **Pulmonar** = hemocultivos, cultivo de esputo (espontaneo o inducido), lavado broncoalveolar, antigenuria (neumococo y legionella), galactomanano en sangre periférica para pacientes con moderado/alto riesgo para *Aspergillus*, frotis nasofaríngeo para *Influenza spp* en periodos de epidemia, serología (PCR) de *P. Jirovecii* en neutropenias profundas, foco respiratorio y tratamiento corticoideo prolongado (prednisona  $\geq$  20 mg al día durante  $\geq$  1 mes).
  - o De elección: Cefepime 2 gr/8 horas IV + Levofloxacino 500 mg/24 horas via oral.
  - o Fluoroquinolona 3ª generación (levofloxacino) o doxiciclina si sospecha de gérmenes atípicos
  - o Vancomicina o linezolid (preferible) en sospecha de SAMR.
  - o Cotrimoxazol 1600/230 mg iv cada 8 horas en sospecha de *P. Jirovecii*
  - o Levofloxacino, Eritro o claritromicina si sospecha de *Legionella spp*.
  - o Anfotericina B liposomal 3 mg/kg/24 ó Voriconazol si infección fúngica probada o mala evolución clínica y/o inestabilidad hemodinámica a pesar de antibioterapia empírica correcta durante 7 días o más a la espera de las pruebas complementarias pertinentes para descartar infección fúngica.
- **Celulitis/Infección de piel y partes blandas** = Considerar biopsia y/o aspirado si lesiones ampollasas. En el régimen de tratamiento cubrir gram positivos.
  - o De elección:
    - Cefepime 2 gr/8 horas + Cefazolina 1 gr/12 horas
    - Cefepime 2 gr/8 horas + Clindamicina 600 mg/8 horas IV.
  - o Si sospecha/confirmación SAMR: Cefepime 2/8 horas + Linezolid 600 mg/12 horas.
- **Lesiones vesiculosas** = Aspirado, punción y/o raspado de las lesiones. Añadir Aciclovir, Famciclovir o Valaciclovir.
- **Vesículas diseminadas** = Aspirado, punción y/o raspado de las lesiones. Considerar Vancomicina además de terapia antifúngica.

- **SNC** = TC/RM, punción lumbar. Ante la sospecha, comenzar con terapia antipseudomónica (cefepime, ceftazidima, meropenem) + vancomicina ó ampicilina. Aciclovir a altas dosis si sospecha de encefalitis de etiología viral.

#### V. REEVALUACIÓN A LAS 72 HORAS:

|                                                                                                                                                                                                                                                                                                                  |                                                                                                                                                        |
|------------------------------------------------------------------------------------------------------------------------------------------------------------------------------------------------------------------------------------------------------------------------------------------------------------------|--------------------------------------------------------------------------------------------------------------------------------------------------------|
| <b>Apirexia</b>                                                                                                                                                                                                                                                                                                  |                                                                                                                                                        |
| Neutrófilos > 500 $\mu$ l                                                                                                                                                                                                                                                                                        | Suspender antibiótico al 5º-7º día de la defervescencia                                                                                                |
| Neutrófilos < 500 $\mu$ l                                                                                                                                                                                                                                                                                        | <i>Mantener antibióticos hasta N&gt;500/<math>\mu</math>l.</i>                                                                                         |
| La duración de la terapia inicial se debe individualizar según la recuperación de neutrófilos, rapidez de la defervescencia de la fiebre, lugar de la infección y enfermedad de base del paciente.                                                                                                               |                                                                                                                                                        |
| <b>Fiebre persistente</b>                                                                                                                                                                                                                                                                                        |                                                                                                                                                        |
| Al 5º-7º día de tratamiento persiste la fiebre sin resultados microbiológicos orientadores y sin descenso de reactantes de fase aguda o bien 2º episodio de fiebre en el mismo episodio de neutropenia; ampliar cobertura antibiótica empírica.                                                                  |                                                                                                                                                        |
| <b>Asociar tratamiento frente a Gram-positivos si no la tenía previamente y tratamiento antifúngico empírico</b>                                                                                                                                                                                                 |                                                                                                                                                        |
| Factores de riesgo para infección fúngica:                                                                                                                                                                                                                                                                       |                                                                                                                                                        |
| <ul style="list-style-type: none"> <li>- <i>neutropenia severa y prolongada</i></li> <li>- <i>tratamiento con corticoides</i></li> <li>- <i>trasplante alogénico</i></li> <li>- <i>deterioro clínico en el 5-7º día de tratamiento ATB empírico</i></li> <li>- <i>persistencia de la neutropenia.</i></li> </ul> | <b>Voriconazol</b> 6 mg/kg/12 horas iv seguido de 4 mg/kg/12 horas iv o 300 mg/12 horas vía oral<br><br><b>Anfotericina B liposomal</b> 3 mg/kg/día iv |
| <b>Como siempre, modificar (escalar o desescalar) ATB según antibiograma</b>                                                                                                                                                                                                                                     |                                                                                                                                                        |

#### VI. DURACIÓN MÍNIMA RECOMENDADA PARA INFECCIONES

- **Bacteriemia/funguemia:**
  - o Gram negativos: 10 a 14 días
  - o Gram positivos: 7 a 14 días
  - o *Staph. Aureus*: al menos hasta 2 semanas después del primer hemocultivo negativo.
  - o Hongos levaduriformes: al menos 2 semanas después del primer cultivo negativo.
- **Neumonía bacteriana:** 10 a 21 días
- **Piel / partes blandas:** 7 a 14 días
- **Sinusitis:** 10 a 21 días
- **Infección fúngica**
  - o *Cándida spp*: mínimo 2 semanas después del último cultivo negativo.
  - o *Aspergillus spp*: mínimo 12 semanas.
- **Infección vírica**
  - o *Virus varicela zoster* o *Virus herpes simple*: 7 a 10 días
  - o *Influenza*: 5 días (Oseltamivir)

**ANEXO 1. Criterios de riesgo de infección por BLEE**

- Colonización/infección previa por BLEE
- Ámbito asistencial: Procedencia de centro sociosanitario, ingreso últimos 6 meses.
- Comorbilidad: sepsis grave/shock séptico, trasplante renal, enfermedad hepática avanzada, Inmunosupresión severa.
- Procedimientos invasivos: Intervención quirúrgica últimos 3 meses, SNG, endoscopia terapéutica, sondaje vesical.
- Tratamiento antibiótico previo (últimos tres meses): Cefalosporinas 3ª generación, quinolonas, carbapenémicos o b-lactámicos + inhibidor de betaactamasas.

**ANEXO 2. Dosis antivirales y antifungicos****ANTIVIRALES**

|                |                                                                                      |
|----------------|--------------------------------------------------------------------------------------|
| Aciclovir      | Herpes mucoso: 5 mg/kg / 8 horas x 1 sem<br>Herpes zóster: 10 mg/kg/ 8 horas x 1 sem |
| Famciclovir    | VHS 250 mg VO<br>VVZ 500 mg VO                                                       |
| Valaciclovir   | VHS O VVZ 1 GR VO                                                                    |
| Ganciclovir    | CMV 5 mg/kg/12 hrs 2 semanas seguidos de 5-6 mg/día 2-4 semanas                      |
| Valganciclovir | CMV 900 mg VO 2 semanas, considerar 900 mg durante 7 días                            |

**ANTIFÚNGICOS**

|                          |                                                                       |
|--------------------------|-----------------------------------------------------------------------|
| Fluconazol               | 200-400 mg IV o VO cada 12 horas seguido de 200 mg / 12 horas VO o IV |
| Itraconazol              | 200 mg / 12 horas IV seguido de 200 mg / 24 horas IV                  |
| Voriconazol              | 6 mg /Kg/ 12 horas IV seguido de 4 mg /Kg /12 horas IV                |
| Caspofungina             | 70 mg IV seguido de 50 mg IV cada 24 horas                            |
| Anidulafungina           | 200 mg / 24h seguido de 100 mg / 24h                                  |
| Micafungina              | 100 mg / 24 horas                                                     |
| Amfotericina B liposomal | 1-5mg /kg/ 24 horas IV                                                |

## Bacteriemia relacionada con catéter (BRC)

Debe de sospecharse en todo paciente que presenta fiebre de reciente aparición sin foco aparente y es portador de un catéter. En los catéteres venoso centrales (CVC) no son frecuentes los signos locales de infección, aunque la disfunción del catéter o la aparición inmediata de fiebre tras la infusión, son signos habituales y de sospecha. En los catéteres venosos periférico (CVP) la presencia de signos locales de infección en forma de flebitis es prácticamente la norma.

### I. POSIBLES PRESENTACIONES CLÍNICAS DE INFECCIÓN SOBRE CATÉTER:

**I.1. Catéter colonizado:** Crecimiento de más de 15 unidades formadoras de colonias (UFC) en cultivo semicuantitativo o de más de 1000 UFC en cultivo cuantitativo del segmento proximal o distal del catéter en ausencia de síntomas clínicos (locales o sistémicos) acompañantes y hemocultivos de sangre periférica negativos.

**I.2. Flebitis:** signos inflamatorios alrededor del punto de salida de un catéter venoso periférico.

**I.3 Infección del lugar de salida:** eritema o induración hasta en los 2 últimos centímetros de la salida del catéter, puede estar asociado a otros signos y síntomas de infección, como fiebre o salida de pus por el lugar de salida del catéter, con o sin evidencia de bacteriemia.

**I.4.Tunelitis:** inflamación, eritema o induración a más de 2 centímetros de la salida del catéter, que sigue el trayecto subcutáneo de un catéter tunelizado, en ausencia de hemocultivos positivos.

**I.5. Infección de la bolsa:** infección lecho subcutáneo de un dispositivo de implantación intravascular (CVC), con frecuencia asociado a inflamación, eritema y/o induración del tejido de la bolsa, pudiendo haber ruptura espontánea y drenaje o necrosis de la piel que recubre.

**I.6. Bacteriemia relacionada con catéter (BRC):** aislamiento del mismo microorganismo (especie y antibiotipo) en el cultivo de la punta del catéter y en al menos 1 hemocultivo extraído de sangre periférica, siempre que se excluya otro diagnóstico etiológico alternativo a la bacteriemia. En ausencia de cultivo del catéter se puede considerar también el diagnóstico de BRC probable cuando:

- cuadro clínico desaparece en las 48 horas siguientes a la retirada del catéter, en un paciente con cuadro clínico compatible y sin otro foco aparente de infección.
- muestras pareadas de sangre, al menos una obtenida del catéter y otra de vena periférica con crecimiento del mismo organismo (especie y antibiotipo) en ambas muestras y tiempo diferencial a favor del catéter.

**I.7. Tromboflebitis séptica:** infección de un trombo formado alrededor del dispositivo intravascular con extensión a la vena canalizada. La bacteriemia o funguemia se mantiene a pesar de la retirada del catéter.

**I.8. Complicaciones a distancia:** metástasis sépticas, como endocarditis u osteomielitis.

**I.9. Infección sistémica complicada,** definida por  $\geq 1$  factor:

- a. Persistencia de la fiebre o hemocultivos positivos a las 72 horas de la retirada del sistema o del inicio del tratamiento antibiótico.
- b. Material protésico implantado previamente (prótesis valvulares o articulares, marcapasos...)
- c. Sepsis/Shock séptico
- d. Tromboflebitis supurativa o infecciones metastásicas (embolismos a distancia, endocarditis, osteomielitis, retinitis).

## **II. PRUEBAS COMPLEMENTARIAS PARA EL DIAGNÓSTICO DE BRC**

### **II.1. Catéter venoso periférico (CVP)**

- Han de retirarse todos y enviar punta del catéter para cultivo.
- Tras la retirada extraer un set de hemocultivos (*se puede obviar si no hay datos de afectación sistémica*).

### **II.2. Catéter venoso central de corta duración (CVC o PICC)**

- Han de retirarse todos y enviar a cultivo los últimos 5 cms.
- Tras la retirada extraer un set de hemocultivos.

### **II.3. Catéter central de larga duración (Hickman® o Port-a-cath®)**

- Hemocultivos a través de cada rama del catéter y simultáneamente extracción de punción de vena periférica (diferenciales).
- Si sospecha de infección del punto de inserción, mandar torunda en punto de entrada y 2 cms alrededor y conexiones.

## **III. CRITERIOS DIAGNÓSTICOS EN BRC**

### **III.1. Con retirada del catéter**

Crecimiento mismo germen (especie y biotipo) en cultivo de punta de catéter ( $\geq 15$  UFC) y en hemocultivo de sangre periférica.

### **III.2. Sin retirada del catéter**

Crecimiento mismo germen (especie y biotipo) en sangre extraída del catéter y hemocultivo de sangre periférica con diferencia de tiempo  $\geq 2$  horas a favor del catéter (hemocultivos diferenciales) o bien obtención de un recuento tres veces mayor de UFC en la sangre del catéter que en la sangre periférica (hemocultivos cuantitativos).

### **III.3 Cultivos superficiales**

Los cultivos de la torunda serán significativos cuando el crecimiento del cultivo sea  $\geq 15$  UFC



Para enviar los hemocultivos diferenciales a Microbiología extraeremos un set de hemocultivo (un frasco de aerobios y otro de anaerobios) de una vena periférica e ídem del catéter central, extrayéndose el mismo volumen de sangre, con la menor diferencia de tiempo posible e identificando en la petición qué dos frascos corresponden a la vena periférica y cuales proceden del catéter.

#### IV. TRATAMIENTO ANTIBIÓTICO EMPÍRICO

Ante la sospecha de BRC retirar el catéter en los casos de CVP y CVC de corta duración, así como en las indicaciones de los de larga duración, enviándolos a cultivo según las indicaciones previas.

| RETIRADA DE CATÉTER                               |                                                                                                                                                                                                                                                            |                                                                    |
|---------------------------------------------------|------------------------------------------------------------------------------------------------------------------------------------------------------------------------------------------------------------------------------------------------------------|--------------------------------------------------------------------|
| <i>Tratamiento empírico de inicio obligado si</i> | <b>FACTORES DE MAL PRONOSTICO</b><br>Situación de inestabilidad por sepsis /shock séptico.<br>Signos locales supurativos.<br>Neutropenia o inmunosupresión grave.<br>Cardiopatía valvular o material protésico (prótesis valvular, articular o marcapasos) |                                                                    |
|                                                   | Ausencia de datos anteriores                                                                                                                                                                                                                               | Vigilancia 24-48 horas                                             |
| <i>Tratamiento empírico no necesario si</i>       | CVP con signos de infección local (flebitis) sin afectación sistémica, inmunosupresión o material protésico.                                                                                                                                               | Vigilancia 24-48 horas<br>No precisa de extracción de hemocultivo. |
| SIN RETIRADA DEL CATÉTER                          |                                                                                                                                                                                                                                                            |                                                                    |
| CVC de larga duración                             | Si se cumplen:<br>Estabilidad hemodinámica<br>Ausencia de datos de gravedad<br>Ausencia de signos locales de infección                                                                                                                                     | Sellado de catéter (contactar con E. Infecciosas)                  |

IMPORTANTE: Retirada obligada del catéter de larga duración cuando:

- Sepsis y/o shock séptico que no se controla en 48-72 horas.
- Bacteriemia mantenida a pesar de tratamiento.
- Tromboflebitis séptica.
- Material protésico implantado (marcapasos, prótesis valvular, articular...).
- Infección supurada del punto de entrada o túnel subcutáneo (reservoritis)
- Bacteriemia/funguemia no complicada por *S. aureus*, *S. lugdunensis*, bacilos gram negativos no fermentadores (*Pseudomonas spp*), *Enterococos* o *Candida spp*

En caso de infección local, no complicada, puede intentarse un abordaje con tratamiento tópico. En caso de que no se logre respuesta pueden utilizarse antimicrobianos sistémicos y si esto también falla, entonces retirar el catéter. En el resto de las situaciones, si queremos tratar de conservar el catéter, contactar con el Servicio de E. Infecciosas y ver opciones de sellado de catéter. El **sellado del catéter** consiste en instilar antibiótico en la luz del catéter, con el objetivo terapéutico de alcanzar concentraciones intraluminales superiores 100 veces a la concentración mínima inhibitoria del microorganismo, evitando así las complicaciones derivadas del tratamiento sistémico a dosis tan elevadas. Para la instilación de antibiótico, se utiliza una dilución que, tras ser administrada, debe permanecer un

mínimo de 8 horas diarias mientras no esté en uso el catéter, y ha de cambiarse dicha solución cada 48 horas (24 horas si el catéter es femoral, si es de hemodiálisis, se cambia tras cada sesión). El tratamiento se mantendrá entre 7-14 días (4 semanas si se trata de un *S. Aureus*), asociado a tratamiento sistémico:

- **Solución** de 50 ml de SSF 0,9% + 500 mg de vancomicina, cefazolina, ceftazidima, amikacina o daptomicina (en este último usar Ringer Lactato®). Se puede **diluir** con heparina sódica, añadiendo a la solución 5 ml de heparina sódica al 1 %. Tras la dilución obtenemos una concentración de antibiótico 10 mg/ml.
- **Instilación** para sellado: 5 ml para catéter tipo Hickman® o 10 ml para catéter tipo Port-a-cath®.

Esta técnica de sellado no se recomienda para infecciones asociadas a *S. Aureus*, *P. Aeruginosa* y *Candida spp*, en las que se reserva tan solo para los casos en los que no se pueda conseguir otro acceso o este esté muy comprometido y en pacientes con muy buen estado general.

En general, el tratamiento antibiótico empírico en la mayoría de las ocasiones, se va a componer de administración de un **glucopéptido** (vancomicina a dosis de 15mg/kg cada 12h si la función renal es normal) **o un lipopéptido** (daptomicina a dosis no inferiores a 6mg/kg cada 24 h), **asociado a un aminoglucósido** (tobramicina o amikacina a dosis únicas diarias convencionales), **a un monobactámico** (aztreonam a dosis de 1-2 g cada 8 h) **ó a una cefalosporina de 3ª-4ª generación**. Dependerá de:

- Conocimiento de los gérmenes implicados.
- Patrones de resistencias locales.
- Factores de riesgo para determinados patógenos (SAMR, BLEEs).

#### CATETER RETIRADO

|                                                                                                                 |                                                                                                                                                                                                                                 |                                                                                                                                                                                                                                                                                                                                                                                                                                                            |
|-----------------------------------------------------------------------------------------------------------------|---------------------------------------------------------------------------------------------------------------------------------------------------------------------------------------------------------------------------------|------------------------------------------------------------------------------------------------------------------------------------------------------------------------------------------------------------------------------------------------------------------------------------------------------------------------------------------------------------------------------------------------------------------------------------------------------------|
| Sin factores de mal pronóstico                                                                                  | Cloxacilina 2 gr/6 h iv<br>ó<br>Vancomicina 1 gr/12h iv                                                                                                                                                                         | Actitud expectante hasta resultados microbiológicos <i>versus</i> iniciar tratamiento<br><br><i>Nota: en nuestro hospital baja prevalencia de SAMR pero alta de estafilococos coagulasa negativos multiresistentes.</i>                                                                                                                                                                                                                                    |
| Sepsis o shock séptico o signos de infección local, material protésico o inmunosupresión (FR de mal pronóstico) | Daptomicina 8-10 mg/kg/24 h iv<br>ó<br>Vancomicina 1 g/12h iv<br><br><u>Cobertura para GRAM NEG:</u><br><br>Cefepime 2 g/8 h iv<br>ó<br>Meropenem 1 g/8 h iv en perfusión extendida (indicado sobre cefepime si riesgo de BLEE) | Preferible en estos pacientes daptomicina sobre vancomicina (sobre todo si ERC)<br><br><u>Añadirle si:</u><br><ul style="list-style-type: none"> <li>- Neutropenia grave (MASCC &lt; 21, CISNE 3)</li> <li>- Antibioterapia previa (especialmente profilaxis con quinolonas)</li> <li>- Colonización previa por Gram negativos.</li> <li>- Catéter femoral</li> <li>- Shock séptico</li> <li>- Estancia prolongada en UCI</li> <li>- Trasplante</li> </ul> |

|  |                                                                                                                                                                                                                                                                                                                                                                                                                                                             |                                                                                                                                                                                                                                                                                                                                 |
|--|-------------------------------------------------------------------------------------------------------------------------------------------------------------------------------------------------------------------------------------------------------------------------------------------------------------------------------------------------------------------------------------------------------------------------------------------------------------|---------------------------------------------------------------------------------------------------------------------------------------------------------------------------------------------------------------------------------------------------------------------------------------------------------------------------------|
|  | <u>Cobertura para <i>Candida spp</i></u><br>Fluconazol 400 mg/12 h iv (si la especie es sensible)<br>ó<br>Anidulafungina 200 mg/iv (dosis de carga), seguido de 100 mg/24 h iv<br>ó<br>Micafungina 100 mg/24 h iv<br>ó<br>Caspofungina 70 mg/iv (dosis de carga) luego 50 mg/24 h iv<br>ó<br>Amfotericina B liposomal 1-5mg /kg/ 24 h iv (**si exposición a antifúngicos en los últimos 3 meses o infección previa por <i>C. glabrata</i> o <i>krusei</i> ) | <u>Añadirle si:</u> <ul style="list-style-type: none"> <li>- Nutrición parenteral</li> <li>- Antibioterapia prolongada</li> <li>- Catéter femoral</li> </ul>                                                                                                                                                                    |
|  |                                                                                                                                                                                                                                                                                                                                                                                                                                                             | <u>Candinas** preferible si:</u> <ul style="list-style-type: none"> <li>- Paciente HD inestable.</li> <li>- Tratamiento previo con azoles.</li> <li>- Sepsis/shock séptico la especie de <i>Candida spp</i> no está identificada.</li> <li>- <i>C. krusei</i>, <i>C. Glabrata</i> u otra especie resistente a azoles</li> </ul> |

## V. TRATAMIENTO ANTIBIÓTICO CONOCIDO EL GERMEN CAUSANTE Y DURACIÓN

IMPORTANTE: El primer día de antibioterapia sistémica dirigida se considera a aquel en el que los hemocultivos son negativos.

### V.1. Bacteriemia por estafilococos coagulasa-negativo

- Tratamiento antibiótico dirigido:
  - Sensible a meticilina: cloxacilina 2 gr cada 6 horas iv
  - Resistencia a meticilina: vancomicina 1gr/12 h iv o daptomicina 6-10 mg/kg/día iv
- No complicada:
  - Se tratará durante 7-10 días si se retira el catéter.
  - Si se conserva el catéter, se tratará durante 14 días y asociando tratamiento local del catéter (sellado con vancomicina)
- Complicada: Retirada de catéter y tratamiento durante 6 semanas tras la retirada.

### V.2. Bacteriemia por enterococcus

- Tratamiento antibiótico dirigido
  - Sensible a ampicilina: ampicilina 2 gr cada 6 horas
  - Resistencia a ampicilina: vancomicina 1gr/12 h iv + gentamicina 3 mg/kg/día iv
  - IMPORTANTE: Son gérmenes intrínsecamente resistentes a cefalosporinas y poco sensibles a carbapenems.
- **El catéter se retirará “siempre”,** y el paciente será tratado con antibióticos.
- No complicada: Tratamiento durante 7-10 días.
- Complicada: Tratamiento durante 6 semanas, tras retirada del catéter.

### V.3. Bacteriemia por *Staph. Aureus*:

- Tratamiento antibiótico dirigido
  - Sensible a meticilina: cloxacilina 2 gr cada 6 horas iv
  - Resistencia a meticilina: vancomicina 1gr/12 h iv o daptomicina 6-10 mg/kg/día iv
- **El catéter se retirará “siempre”**, y el paciente será tratado con antibióticos. El mantenimiento de un catéter vascular tunelizado o de un dispositivo implantable causante de una BRC por *Staph. Aureus* únicamente ha de valorarse en casos muy seleccionados, cuando no existen signos de infección a nivel del túnel, a nivel de la salida o de la incisión quirúrgica, el paciente está estable hemodinámicamente y no hay sospecha de complicaciones metastásicas a distancia. En estos casos se puede considerar realizar tratamiento conservador con antibioterapia local y sistémica, sabiendo que se ha observado una tasa de fracasos superior al 70%.
- No complicada: Tratamiento durante 14 días.
- Complicada: Tratamiento durante 6 semanas, tras retirada del catéter.
- **En todos los casos debe realizarse Ecocardiograma transesofágico** para descartar endocarditis.

### V.4. Bacteriemia por bacilos gram negativos

- Tratamiento antibiótico dirigido
  - Enterobacter sp/Acinetobacter: imipenem 500 mg/8 h, meropenem 1 gr/8h, ertapenem 1 g/24 h.  
*CUIDADO: el tratamiento con cefalosporinas de 3ª generación o con aztreonam puede seleccionar mutantes desreprimidos de E. Aerogenes y E. Cloacae productoras de AmpC resistentes a todos los betalactámicos incluidos los inhibidores de las betalactamasas, excepto los carbapenems.*
  - E. Coli y Klebsiella spp.
    - No productor de BLEE: ceftriaxona 1 gr/12 horas.
    - Productor de BLEE: imipenem 500 mg/6 h, meropenem 1gr/8 h, ertapenem 1 g/24 h.
  - S. Maltophilia: Cotrimoxazol 15 mg/kg/día solo o asociado a otro antibiotico (tigeciclina, moxi y levofloxacin, aztreonam, ceftazidima y colistina) según la gravedad del caso y sensibilidad del antibiograma.
  - P. Aeruginosa: Ceftazidima 2gr/8 h, cefepime 2/8 h, imipenem 500mg/6 h, meropenem 1g/8 h, piperacilina-tazobactam 4-0,5 gr c/8 h más amikacina 20 mg/kg/24 h.
- **El catéter se retirará siempre.**
- No complicada: 7-10 días.
- Complicada: prolongar el tratamiento hasta 6 semanas.

### V.5. Funguemia

- **El catéter se retirará siempre**
- Mantener el tratamiento antifúngico, durante al menos 14 días tras el último hemocultivo positivo y la desaparición de la clínica de infección.

## Enfermedad tromboembólica venosa (ETV): TEP, TVP y trombosis asociada a cateter

### I. TRATAMIENTO DE LA ENFERMEDAD

Tratamiento estándar Heparinas de bajo peso molecular.

A día de hoy no tienen aprobación los nuevos anticoagulantes orales, aunque hay datos de no inferioridad frente a las HBPM (Edoxaban 60 mg/24 h ó Ribaroxabán 15 mg cada 12 h--> 20 mg/24 h)

*Raskob GE, van Es N, Verhamme P, et al. Edoxaban for the treatment of cancer-associated venous thromboembolism. N Engl J Med 2018; 378:615.*

*Young AM, Marshall A, Thirlwall J, et al. Comparison of an Oral Factor Xa Inhibitor With Low Molecular Weight Heparin in Patients With Cancer With Venous Thromboembolism: Results of a Randomized Trial (SELECT-D). J Clin Oncol 2018; 36:2017.*

#### **I.1. Anticoagulación a dosis terapéuticas en situaciones complejas**

I.1.a. Lesiones en el sistema nervioso central:

Se podrá usar anticoagulación a dosis estándar excepto:

- Metástasis de Melanoma o tumor renal dónde deberán usarse a dosis reducidas (50-75% de la dosis total)
- Gliomas inicialmente comenzar por dosis entre 50-75% hasta control local de la enfermedad.

I.1.b. Trombosis esplénicas incidentales

Deben anticoagularse

I.1.c. Trombopenia:

- A dosis plenas si > 50.000
- Al 50% por entre 50.000-20.000
- Si < 20.000:
- 30 días de anticoagulación-->Suspende
- < 30 días transfundir plaquetas y pautar Enoxaparina al 50%.
- Valorar filtro de vena cava en TVP en la fase aguda y < 20.000 ó < 50.000 plaquetas y pobre reserva cardiopulmonar.

I.1.d. Mantenimiento antiplaquetario concomitante:

Sólo se debe mantener en aquellos con alto riesgo de eventos coronarios (síndrome coronario agudo o colocación de stent en < 1 año).

En pacientes portadores de stent de > 1 año individualizar.

**II. PROFILAXIS PRIMARIA****II.1. Pacientes de alto riesgo AMBULATORIO**

Valorar tromboprofilaxis primaria farmacológica en los pacientes de alto riesgo según la escala Khorana sopesando el riesgo de sangrado y apoyado con otras escalas en caso de dudas.

| Escala Khorana                                     |        |
|----------------------------------------------------|--------|
| Características de los pacientes                   | Puntos |
| Localización del primario                          |        |
| Páncreas/estomago                                  | 2      |
| Pulmón, linfomas, ginecológicos, vejiga, testículo | 1      |
| > 350.000 plaquetas prequimioterapia               | 1      |
| Hb <10g/dl ó uso de estimulantes eritropoyéticos   | 1      |
| Leucos prequimioterapia >11.000                    | 1      |
| IMC > 35                                           | 1      |
| Alto riesgo $\geq 3$ PUNTOS (7,1-41%)              |        |

**II.2. Pacientes Hospitalizados:**

Siempre se recomienda tratamiento con heparina de bajo peso molecular a dosis PROFILÁCTICAS en todos los pacientes **salvo**:

- Sangrado en SNC
- Sangrado mayor activo
- Trombopenia < 20.000

**Contraindicaciones Relativas:**

- Trombopenia entre 20.000-50.000
- Riesgo de caída
- Sangrado mayor en las 48 horas anteriores
- 48/72 horas postneurocirugía
- Disfunción plaquetaria
- Alteraciones de la coagulación
- Punción lumbar en las 12 horas anteriores
- Coagulopatía

En estos casos se deben valorar el uso de medias de compresión

**II.3. Profilaxis de trombosis relacionada con catéter:**

La profilaxis con acenocumarol o heparina de bajo peso molecular a dosis profiláctica no está indicada (no disminuye la incidencia de trombosis asociada al catéter) (Central Venous Catheter Care for the Patient With Cancer: American Society of Clinical Oncology Clinical Practice Guideline. Schiffer C.A et al. J Clin Oncol Vol 31, Issue 10 (April), 2013: 1357-1370).

## Enfermedad tromboembólica venosa (ETV): TEP, TVP y trombosis asociada a cateter

SIN EMBARGO, en caso de colocación de nuevo reservorio tras trombosis, se debe mantener anticoagulación al menos durante 30 días.

### III. SITUACIONES ESPECIALES

#### III.1. Trombosis en paciente con antiangiogénicos

En este escenario se recomienda SUSPENDER al menos durante 2 semanas dicho tratamiento. En caso de TEV potencialmente mortal, no se recomienda reanudar el tratamiento antiangiogénico.

#### III.2. Uso de filtro de vena cava en pacientes que requieren cirugía o procedimientos invasivos

La evidencia es bastante escasa, reservándose únicamente en aquellas situaciones dónde el tratamiento anticoagulante este contraindicado que essobretudo en las primeras 2-4 semanas del diagnóstico de la trombosis. El tratamiento anticoagulante y la retirada del filtro deberán realizarse lo antes posible.

#### III.3. Anticoagulación más allá de los seis meses

Se debe mantener el tratamiento anticoagulante en aquellos que tengan cáncer activo y/o estén en curso de quimioterapia. La dosis de Heparina más allá de seis meses podrá ser a dosis plenas o intermedias/profilácticas en función de algunas características:

|                                 | Dosis plenas Heparinas                                                                       | Dosis intermedias/profilaxis                              | Incrementar dosis 25% |
|---------------------------------|----------------------------------------------------------------------------------------------|-----------------------------------------------------------|-----------------------|
| <b>Evento tromboembólico</b>    | Sintomático y amenazante para la vida                                                        | Incidental<br>Asociado a cateter<br>Miembro inferior      | Retrombosis           |
| <b>Características paciente</b> | Obeso<br>Inmovilización<br>Trombofilia<br>Insuficiencia venosa<br>Síndrome postrombotico     | Trombopenia<br>Insuficiencia renal                        |                       |
| <b>Neoplasia</b>                | Enfermedad metastásica<br>Compresión tumoral de vaso<br>Tumores gástricos, pulmón y páncreas | Mama y próstata                                           |                       |
| <b>Tratamiento</b>              | Quimioterapia<br>EPO<br>Hormonoterapia                                                       | Inmunoterapia<br>Terapia diana                            |                       |
| <b>Riesgo de sangrado</b>       | Bajo                                                                                         | Alto<br>Antecedente de sangrado mayor<br>Antiangiogénicos |                       |

#### III.4. Necesidad de estudio de trombofilia en trombosis asociadas a cáncer

NO se recomienda de rutina

#### III.5. Ajustes de Heparina en función de anti-factor Xa

No se recomienda de rutina salvo en casos de obesidad mórbida, embarazo o aclaramiento de creatinina < 30

## **ANEXO:**

A Multidisciplinary (SEMI–SEOM–SETH) Expert Consensus Pachón et al September 17, 2018

Dosis de Heparinas:

### **Dosis de heparina:**

#### **Enoxaparina**

Profiláctica 40 mg/día.

Terapéutica: 1,5 mg/kg/día.

1 mg/kg/día casa 12 horas (obesos, EP sintomático, TEV recurrente, trombosis ilíaca) durante 10 días, luego 1,5-1 mg/kg/día.

#### **Bemiparina:**

Profiláctica

Terapéutica: 115 UI anti-Xa/kg peso/día (La casa comercial propone una escala de rangos en función al peso)

#### **Tinzaparina:**

Terapéutica: 175 UI anti-Xa/kg de peso corporal, administradas subcutáneamente una vez al día. (La casa comercial propone una escala de rangos en función al peso)



## Consejo genético (CG)

### I. DERIVACIÓN DE LOS PACIENTES

- Siempre que sea posible, se enviará como probando a un individuo diagnosticado de cáncer y no un familiar sano.
- Si el individuo ha sido tratado en un centro privado o hace mucho tiempo que recibió el tratamiento, de manera que no se puede acceder a su historia digital, se debe aportar en un informe complementario la historia oncológica, con los datos histológicos del tumor y los tratamientos recibidos.
- Desde la consulta de CG, el paciente será remitido al lugar de procedencia con un informe de recomendaciones acerca de su seguimiento o de cirugía reductora de riesgo:
- Las mujeres sanas portadoras de mutación en BRCA u otro gen de alto riesgo de CMOH serán remitidas a la unidad de mama / Ginecología con un informe de recomendaciones a través de su médico de familia.
- Los pacientes sanos portadores de mutaciones en los genes reparadores del DNA (Sd Lynch) o de poliposis colónica, serán remitidos a la consulta de Digestivo
- Sólo se realizará seguimiento de portadores de mutaciones en Oncología Médica en los pacientes que se encuentren en seguimiento / tratamiento por su diagnóstico de cáncer; pero no en la consulta de cáncer hereditario.

### II. CRITERIOS CLINICOS PARA LA REALIZACIÓN DE CONSEJO GENÉTICO EN CMOH

Independientemente de la historia familiar:

- CM y CO sincrónico o metacrónico.
- CM antes de los 35 años o CM antes de los 40 años con árbol familiar no informativo (*menos de 2 mujeres que hayan vivido más allá de los 45 años en ambas ramas familiares*).
- CM bilateral, el primer diagnóstico antes de los 40 años.
- CM fenotipo TRIPLE NEGATIVO antes de los 50 años.
- Carcinoma epitelial de alto grado (no mucinoso) de ovario, o de trompas de Falopio, o peritoneal primario.

Dos o más familiares de primer grado por la misma línea familiar con alguna combinación de los siguientes:

- CM bilateral y otro CM antes de los 50 años.
- CM en el varón.
- CM y CO.
- Dos casos de CM diagnosticados antes de los 50 años.
- CM fenotipo TRIPLE NEGATIVO a cualquier edad si hay otro antecedente familiar de CM y/o CO.

3 ó más familiares cercanos por la misma línea familiar con CM o CO.

### III. CRITERIOS CLINICOS PARA LA REALIZACIÓN DE CONSEJO GENÉTICO EN CCHNP (cáncer de colon hereditario no asociado a poliposis)

- A todos los pacientes menores de 70 años diagnosticados de cáncer colorrectal y aquellos mayores de 70 años que cumplan criterios de Bethesda revisados, se les solicitará AL DIAGNÓSTICO, la IHQ de las proteínas de los genes reparadores (MLH1, MSH2, PMS2, MSH6):
  - o En caso de pérdida de expresión de algunas de las proteínas de los genes MMR, serán enviados a la Unidad de Cáncer hereditario.
  - o En caso de expresión conservada de las proteínas MMR, si la familia cumple criterios de Ámsterdam serán remitidos a la unidad de Cáncer hereditario.
- Mujeres con adenocarcinoma de endometrio diagnosticada con menos de 60 años, con pérdida de expresión de algunas de las proteínas de los genes MMR

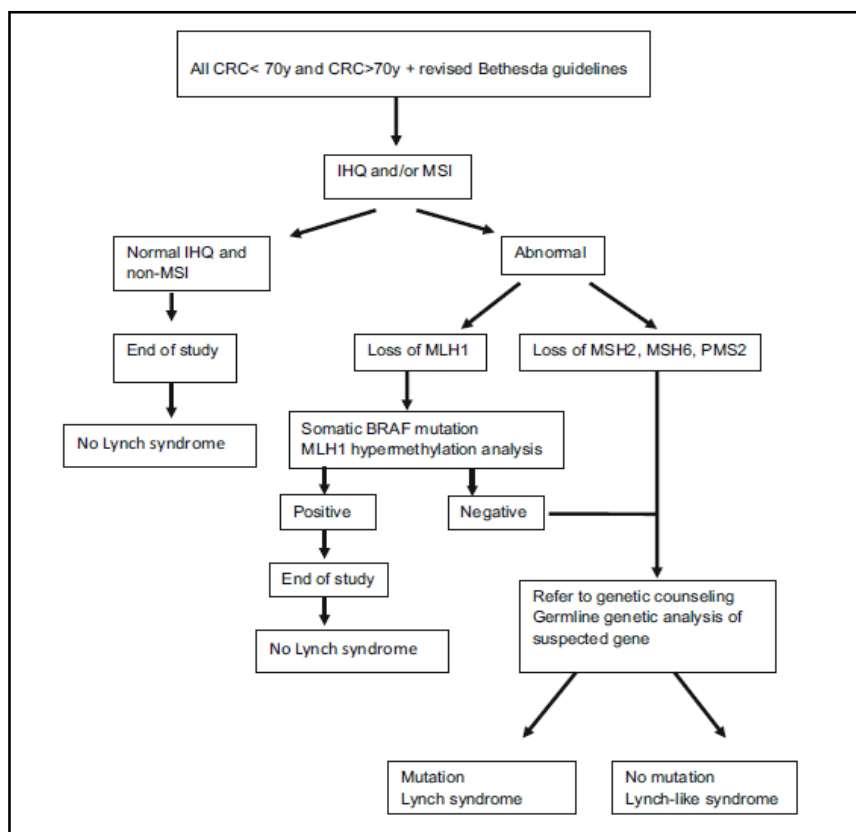

SEOM clinical guideline hereditary colorectal cancer. Guillen-Ponce, C, et al. Clin Trasl Oncol, 2015.

#### III.1. Criterios de Ámsterdam I (han de cumplirse todos)

- Tres familiares afectados de cáncer colorrectal, uno de ellos familiar de primer grado de los otros dos.
- Al menos, dos generaciones afectadas.
- Al menos, 1 cáncer colorrectal diagnosticado antes de los 50 años.
- Poliposis excluida.

### III.2. Criterios de Ámsterdam II

- Tres familiares afectados de cáncer asociado a CCHNP (colorrectal, endometrio, uréter o pelvis renal, intestino delgado) uno de ellos familiar de primer grado de los otros dos.
- Al menos, dos generaciones afectadas.
- Al menos, 1 cáncer colorrectal diagnosticado antes de los 50 años.
- Poliposis excluida.

### III.3. Criterios de Bethesda (ha de cumplirse al menos uno de ellos).

- Individuos con cáncer en familias que cumplan criterios de Ámsterdam
- Individuos con dos tumores relacionados con CCHNP, incluyendo cáncer colorrectal sincrónico y metacrónico o cánceres extracolónicos asociados\*.
- Individuos con cáncer colorrectal y un pariente de primer grado con cáncer colorrectal y/o tumores extracolónicos relacionados con CCHNP y/o un adenoma colorrectal; uno de los cánceres diagnosticado antes de los 40 años.
- Individuos con cáncer colorrectal o cáncer de endometrio diagnosticado antes de los 45 años.
- Individuos con cáncer colorrectal derecho con formas histológicas poco diferenciadas (sólido/cribiforme) diagnosticado antes de los 45 años.
- Individuos con cáncer colorrectal con células en anillo de sello diagnosticado antes de los 45 años.
- Individuos con adenomas diagnosticados antes de los 45 años.

### III.4. Criterios de Bethesda revisados

- CCR diagnosticado en un paciente < 50 años.
- CCR sincrónicos, metacrónicos, u otros tumores asociados al Sd de Lynch, independientemente de la edad.
- CCR con histología MSI-H (presencia de linfocitos infiltrantes de tumor, reacción Chron +, diferenciación mucinosa/anillo de sello o medular) en paciente < 60 años.
- Paciente con CCR y un pariente en 1º grado con tumor asociado a Sd de Lynch y con uno de los cánceres diagnosticado < 50 años.
- Pacientes con CCR con dos o más parientes de 1º ó 2º grado con tumor asociado a Sd de Lynch independientemente de la edad.

### IV. TUMORES ASOCIADOS A SD. LYNCH:

*Cáncer de endometrio, vejiga, estómago de histología intestinal, intestino delgado, ovario de histología endometrioide, páncreas y vías biliares, uréter y pelvis renal, cerebral, tumores cutáneos como queratoacantoma o carcinoma sebáceo.*

## **V. CRITERIOS CLINICOS PARA LA REALIZACIÓN DE CONSEJO GENETICO EN LA POLIPOSIS COLÓNICA FAMILIAR (PAF/PAFA)**

- Un solo individuo diagnosticado clínicamente de PAF (>100 pólipos adenomatosos) o bien sus familiares directos.
- Un solo individuo con poliposis colónica moderada (10-100 pólipos).

### **Características clínicas de la PAF:**

- Hipertrofia congénita del epitelio de la retina
- Alteraciones dentarias
- Fibromas y lipomas
- Quistes sebáceos
- Quistes epidermoides.

## **VI. S. FEOCROMOCITOMA/PARAGANGLIOMA FAMILIAR: Un solo criterio es suficiente:**

- Ante el diagnóstico de un paraganglioma aparentemente esporádico.
- Ante el diagnóstico de un feocromocitoma diagnosticado antes de los 60 años, bilateral, multifocal o extraadrenal.

## **VII. CARCINOMA GÁSTRICO DIFUSO HEREDITARIO: Un solo criterio es suficiente:**

- 2 casos de cáncer gástrico en familiares de 1º-2º-3er grado, uno de ellos documentado con histología difusa y por debajo de 50 años.
- ≥ 3 casos de cáncer gástrico en familiares de 1º-2º-3er grado independientemente de la edad de diagnóstico y con al menos un caso documentado con histología difusa.
- Un caso de cáncer gástrico difuso y cáncer de lobulillar de mama en la misma mujer o bien en familiares directos (1º-2º-3er grado).
- Un caso diagnosticado de cáncer gástrico difuso por debajo de 40 años

## **VIII. CÁNCER DE PRÓSTATA HEREDITARIO**

- ≥ 3 casos de cáncer de próstata en familiares de 1º-2º grado independientemente de la edad al diagnóstico.
- Dos familiares directos diagnosticados de cáncer de próstata antes de los 60 años.
- Al menos un individuo con diagnóstico de cáncer de próstata por debajo de 50 años.

## **IX. SÍNDROME DE LI FRAUMENI**

El SLF clásico se define por la presencia de **todos** los criterios siguientes:

- Un probando con un sarcoma diagnosticado antes de los 45 años
- Un familiar de primer grado con cualquier cáncer antes de los 45 años
- Un familiar de primer o segundo grado con cualquier cáncer antes de los 45 años o un sarcoma a cualquier edad.

El SLF debe sospecharse también en personas que reúnan alguno de **los criterios de Chompret** para estudio de TP53:

- Un tumor del espectro del SLF (sarcoma de tejidos blandos, osteosarcoma, tumor cerebral, cáncer de mama en mujeres premenopáusicas, carcinoma adrenocortical, leucemia, cáncer de pulmón broncoalveolar) diagnosticado antes de los 46 años, y, al menos 1 familiar de primer o segundo grado con un tumor SLF (excepto cáncer de mama si el probando tiene cáncer de mama) antes de los 56 años o con múltiples tumores; o
- Múltiples tumores en un mismo individuo (excepto tumores múltiples de mama), 2 de los cuales pertenezcan al grupo de tumores del SLF y el primero de ellos se diagnosticase antes de los 46 años; o
- Carcinoma adrenocortical o tumor del plexo coroideo, con cualquier historia familiar

#### **X. SD DE PREDISPOSICIÓN A CÁNCER RENAL:**

Sd de Birt-Hogg-Dubé (BHD): Diagnóstico clínico:

- 1 Criterio mayor: presencia de, al menos, 5 fibrofoliculomas, en edad adulta, uno confirmado histológicamente
- 2 criterios menores:
  - múltiples quistes pulmonares, basales, bilaterales, sin causa aparente, con o sin neumotórax.
  - cáncer renal < 50 años o cáncer renal multifocal o cáncer renal bilateral o cáncer renal con histología mixta oncocítica y cromófoba.
  - familiar de primer grado con diagnóstico de BHD.

#### **XI. MELANOMA MALIGNO FAMILIAR:**

- Al menos un individuo con diagnóstico de dos melanomas malignos no relacionados o un individuo con doble diagnóstico de melanoma maligno y cáncer de páncreas.
- Diagnóstico de melanoma maligno en dos familiares de primer o segundo grado.

**Para la realización de otros estudios genéticos, contactar directamente con la unidad de cáncer hereditario para comentar el caso.**

Toxicidades a nuevas terapias anti-diana

I. MANEJO HTA POR TKI

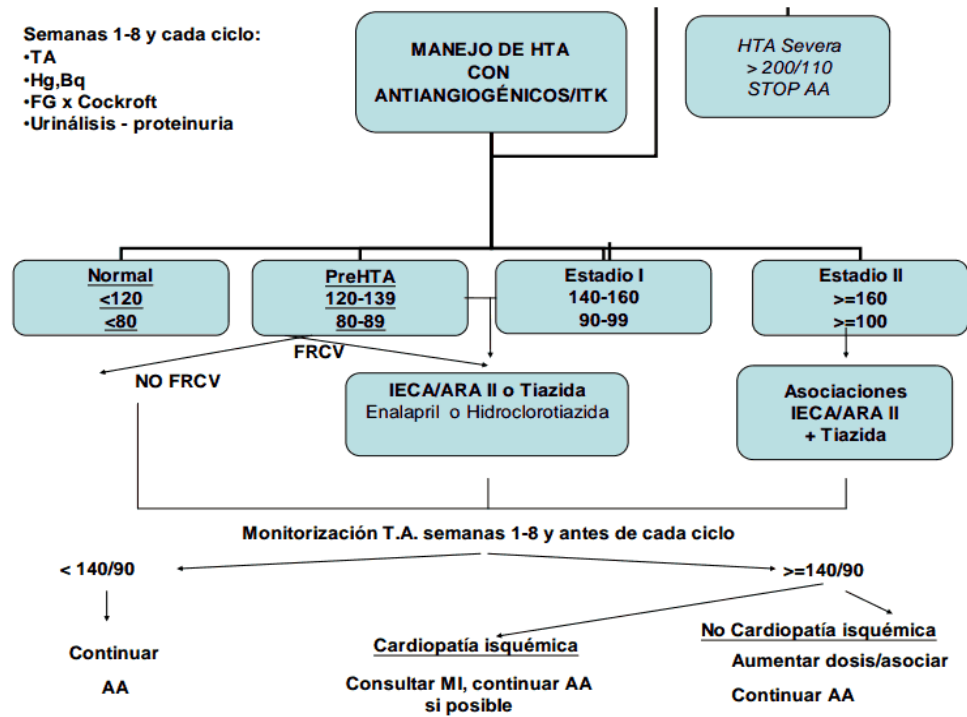

\*\* Combinaciones IECAs + Tiazidas

| Principio Activo                                    | Administración                                            |
|-----------------------------------------------------|-----------------------------------------------------------|
| Valsartán (80 /160) + Hidroclorotiazida (12.5 – 25) | 1 / 24 horas<br>(Max 160-25/24 horas)                     |
| Eprosartán (600) + Hidroclorotiazida (12.5-25)      | 1/24 horas                                                |
| Candesartán (16) + Hidroclorotiazida (12.5)         | 1/24 horas                                                |
| Captopril (50) + Hidroclorotiazida (25)             | 1/ 24 horas<br>Maximo 1 /12 horas                         |
| Enalapril (20) + Hidroclorotiazida (12.5)           | 1/ 24 horas<br>½ / 24 horas manten<br>1 / 12 horas maximo |

**II. MANEJO CARDIOTOXICIDAD POR TKI**

|                                         | Grado 1                        | Grado 2                                                                                                                                                                                                        | Grado 3                                                                                                                                   | Grado 4                                |
|-----------------------------------------|--------------------------------|----------------------------------------------------------------------------------------------------------------------------------------------------------------------------------------------------------------|-------------------------------------------------------------------------------------------------------------------------------------------|----------------------------------------|
| <b>Criterios de Cardiotoxicidad NCI</b> | Asintomático<br>FEVI<br>50–60% | Asintomático<br>FEVI<br>40-50%                                                                                                                                                                                 | Sintomático<br>FEVI<br>20-40%                                                                                                             | Síntomas refractarios<br>FEVI<br>< 20% |
| <b>Recomendaciones</b>                  | Continuar misma dosis          | <ul style="list-style-type: none"> <li>•Decremento absoluto &lt; 20% : misma dosis</li> <li>•Decremento absoluto &gt; o = 20% : STOP ITK, disminuir dosis hasta G1 y seguir con esa dosis reducida.</li> </ul> | <ul style="list-style-type: none"> <li>•STOP ITK de Inicio</li> <li>•Posteriormente disminuir dosis hasta FEVI basal o grado 1</li> </ul> | •STOP ITK                              |

**III. HIPOTIROIDISMO POR TKI**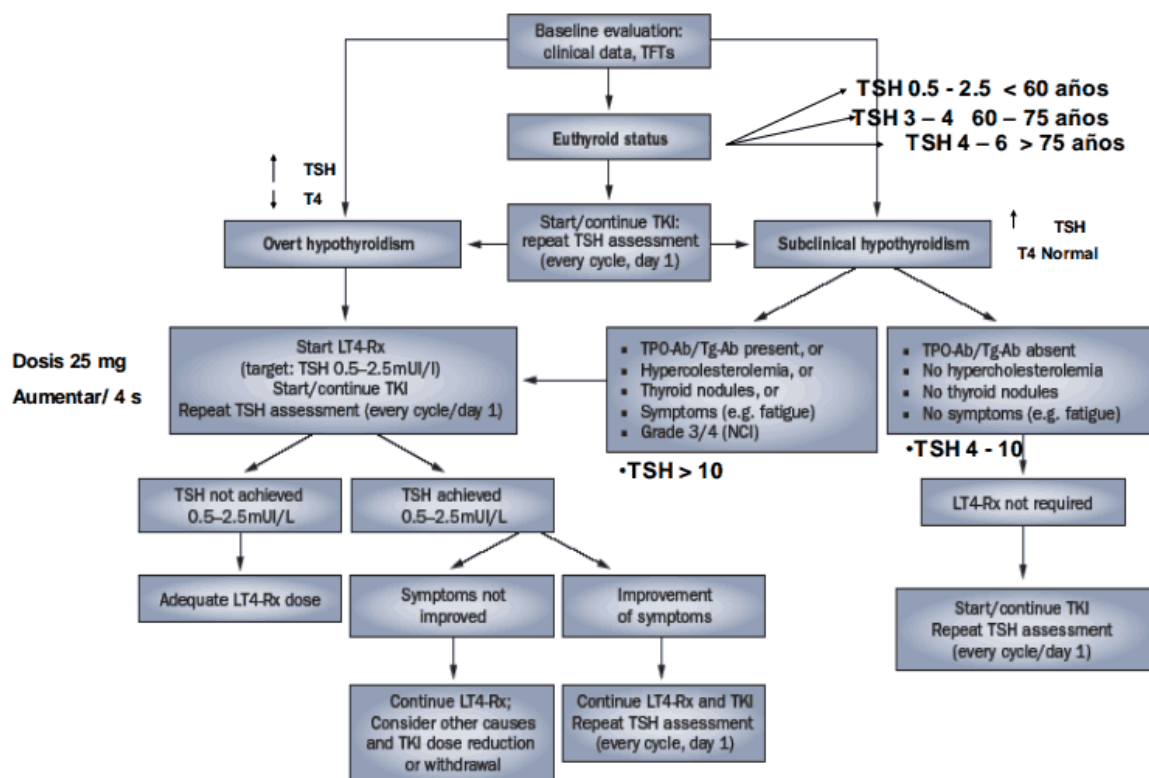

**IV. TRATAMIENTO DEL SDME. MANO-PIE POR TKI**

| Grado | Tratamiento                                                                                                                                                                              | Modificación de dosis                                                                                                   |
|-------|------------------------------------------------------------------------------------------------------------------------------------------------------------------------------------------|-------------------------------------------------------------------------------------------------------------------------|
| 1     | Guantes y calcetines de algodón<br>Evitar agua caliente<br>Cremas emolientes ( <i>Emoilcrema</i> ), queratolíticos y Ac. Salicílico ( <i>Rebladercrema de Urea o Ureadin 30% Spray</i> ) | No modificar dosis<br>Monitorizar cambios e intensidad de signos y síntomas                                             |
| 2     | Añadir lidocaína, pregabalina o codeína para el dolor o corticoides tópicos (Clobetasol) 2 veces/día                                                                                     | No suspender<br>Puede reducirse un nivel de dosis durante 7 días, hasta alcanzar gr.0-1 y reanudar dosis habitual       |
| 3-4   | Además suspender el tratamiento                                                                                                                                                          | Suspender el tratamiento 7 días hasta grados 0-1, reanudar a nivel de dosis inferior y escalar si no recurre toxicidad. |

**V. TRATAMIENTO ERUPCIÓN ACNEIFORME POR TKI**

|         | Grado 1                                                                                                                                                      | Grado 2                                                                                                                                                                                                                                                                                                                                                                                                                                                                                                                                                                                                                                                                                                                                                                                                                                                                                                                                                                            | Grado 3                                                                                                                                         | Grado 4          |
|---------|--------------------------------------------------------------------------------------------------------------------------------------------------------------|------------------------------------------------------------------------------------------------------------------------------------------------------------------------------------------------------------------------------------------------------------------------------------------------------------------------------------------------------------------------------------------------------------------------------------------------------------------------------------------------------------------------------------------------------------------------------------------------------------------------------------------------------------------------------------------------------------------------------------------------------------------------------------------------------------------------------------------------------------------------------------------------------------------------------------------------------------------------------------|-------------------------------------------------------------------------------------------------------------------------------------------------|------------------|
| Actitud | <ul style="list-style-type: none"> <li>•No tratamiento</li> <li>•Geles de avena</li> <li>•Máxima hidratación</li> <li>•Evitar la exposición solar</li> </ul> | <ul style="list-style-type: none"> <li>•Antibióticos tópicos (Mupirocina crema, Ac. Fusídico crema al 2%, Eritromicina gel y sol al 2%, Clindamicina gel y sol 1%, Metronidazol crema o gel 2%, Gel peróxido de Benzoilo 5%) RAM: sequedad</li> <li>•Corticoides tópicos &lt;4s</li> <li>•Posología:<br/>1 / 12h semanas 1-2,<br/>1 / 24 h semana 3 (Prednicarbo crema sol 0.25%, Metilprednisolona aceponato crema, solución cutánea, emulsion 0.1%, Hidrocortisona tópica loción 1%, muy útiles en eczema)</li> <li>•Antihistamínicos orales (Desclorfeniramina 6 mg/12h)</li> <li>•Antibióticos orales (Doxiciclina 50 - 100mg/día vs Augmentine 500/8h)<br/>Mantener Doxyciclinas durante el tratamiento al menos 3 m, no Augmentine.</li> <li>•Fisuras : Ac. Salicílico+Urea, Solucion acuosa destilada nitrato de plata 1/200 o Parches de hidrocoloide.</li> <li>•Paroniquia: Solucion acuosa destilada nitrato de plata 1/200, Clorhexidina o posipón ungüento.</li> </ul> | <ul style="list-style-type: none"> <li>•Stop tratamiento hasta resolución</li> <li>•Todo lo anterior con Doxyciclinas 100mg/12 horas</li> </ul> | Stop tto Soporte |

**VI. MANEJO DE NEUMONITIS PRODUCIDA POR INHIBIDORES DE M-TOR**

| Grado | Definición                                             | Tratamiento específico                                         | Modificación de dosis        |
|-------|--------------------------------------------------------|----------------------------------------------------------------|------------------------------|
| 1     | No síntomas<br>Sí alteración Rx<br>No Alteración PFR   | No precisa                                                     | No precisa                   |
| 2     | Sínt. Mínimos<br>Sí alteración Rx<br>Sí alteración PFR | Descartar infección<br>Prednisona 1mg/kg                       | Interrumpir hasta resolución |
| 3     | Interfiere en vida diaria o requiere oxigenoterapia    | Descartar infección<br>Prednisona 1mg/Kg                       | Reducir dosis                |
| 4     | Soporte ventilatorio / Amenaza vital                   | Descartar infección<br>Prednisona 1mg/kg<br>Medidas de soporte | Suspender definitivamente    |



**VII. MODIFICACIÓN DE DOSIS DE INHIBIDORES DE BRAF EN BASE A INTERVALO DE QT**

| Modificación de dosis recomendada                                                 |                                                                                                                                                                              |
|-----------------------------------------------------------------------------------|------------------------------------------------------------------------------------------------------------------------------------------------------------------------------|
| QTc > 500ms al comienzo                                                           | No se recomienda tratamiento                                                                                                                                                 |
| QTc aumenta por encima de 500ms y cambios > 60ms de los valores de pretratamiento | Interrumpir temporalmente el tratamiento hasta que QTc<500ms.<br>Reanudar el tto. Con dosis de escalon inferior.                                                             |
| 2ª aparición de QTc>500ms y cambio de <60ms de los valores de pretratamiento      | Interrumpir temporalmente el tto. Hasta que QTc<500ms.<br>Reanudar el tto. Con dosis de escalon inferior, o suspender definitivamente si ya había sido reducida previamente. |
| 3ª aparición de QTc >500ms y cambio <60ms de los valores de pretratamiento        | Interrumpir de forma permanente.                                                                                                                                             |

**VIII. Tratamiento de la Diarrea/Colitis por Inmunoterapia**

| Grado Diarrea/Colitis                                                                                                                                                                                                           | Manejo                                                                                                                           | Seguimiento                                                                                                                                                                                                                                                                                                            |
|---------------------------------------------------------------------------------------------------------------------------------------------------------------------------------------------------------------------------------|----------------------------------------------------------------------------------------------------------------------------------|------------------------------------------------------------------------------------------------------------------------------------------------------------------------------------------------------------------------------------------------------------------------------------------------------------------------|
| <b>Grado 1</b><br>Diarrea < 4 deposiciones/día<br>Colitis asintomática                                                                                                                                                          | Continuar el tratamiento<br>Tto sintomático                                                                                      | Vigilancia estrecha<br>Si empeoramiento, tratar como grado 2-3                                                                                                                                                                                                                                                         |
| <b>Grado 2</b><br>Diarrea 4-5 deposiciones/día > de las basales, sin interferir en ABVD.<br>Colitis: Sangre en heces o dolor abdominal                                                                                          | Retrasar el tto.<br>Inmunoterápico<br>Tto. sintomático                                                                           | <u>Si mejora a grado 1:</u> Reanudar tto inmunoterápico.<br><u>Si persiste &gt; 5-7 días o recurre:</u> 0.5-1mg/Kg/día de Metilprednisolona, pauta descendente por lo menos en un mes. Reanudar tto. Inmunoterápico.<br>Valorar ATB<br><u>Si empeora o persiste &gt;3-5 días con CE orales:</u> Tratar como grado 3-4. |
| <b>Grado 3-4</b><br>Diarrea > 7 deposiciones/día de las basales; incontinencia, líquido IV> 24h; interferencia con ABVD.<br>Colitis G3: Dolor abdominal intenso; peritonismo.<br>Colitis G4: Perforación, potencialmente mortal | Discontinuar Tto.<br>Metilprednisolona 1-2 mg/Kg /24h IV<br>ATB Profiláctico para gérmenes oportunistas.<br>Valorar colonoscopia | <u>Si mejora:</u> Continuar con CE hasta que pasa a grado 1, y descender progresivamente.<br><u>Si persiste &gt; 3-5 días o recurre:</u> Añadir Infliximab 5mg/Kg (No en perforación o sepsis).                                                                                                                        |

**IX. ESCALA DE TOXICIDAD POSTQUIMIOTERAPIA (CTCAE –NCI )****1. Toxicidad hematológica**

| Efecto Adverso | 1                | 2               | 3               | 4          |
|----------------|------------------|-----------------|-----------------|------------|
| Anemia         | Normal – 10g/dl  | 10-8g/dl        | 8-6.5g/dl       | <6.5g/dl   |
| Leucopenia     | Normal- 3000/mm3 | 3000-2000/mm3   | 2000-1000/mm3   | <1000/mm3  |
| Neutropenia    | Normal-1500/mm3  | 1500-1000/mm3   | 1000-500/mm3    | <500/mm3   |
| Plaquetopenia  | Normal-75000/mm3 | 75000-50000/mm3 | 50000-25000/mm3 | <25000/mm3 |

**2. Toxicidad Digestiva****2.a. Nauseas**

|                |                                                                                                                                          |
|----------------|------------------------------------------------------------------------------------------------------------------------------------------|
| <b>Grado 1</b> | <b>Pérdida de apetito sin alteración en los hábitos alimentarios</b>                                                                     |
| <b>Grado 2</b> | Disminución de ingesta oral sin pérdida significativa de peso, deshidratación o desnutrición. Indicada administración de fluidos IV <24h |
| <b>Grado 3</b> | Consumo calórico oral inadecuado; indicada sueroterapia IV, alimentación por sonda o Nutrición Parenteral Total (NPT) >24h               |
| <b>Grado 4</b> | Potencialmente mortal                                                                                                                    |

**2.b. Vómitos**

|                |                                                         |
|----------------|---------------------------------------------------------|
| <b>Grado 1</b> | <b>1 -2 episodios en 24h</b>                            |
| <b>Grado 2</b> | 3-5 episodios en 24h                                    |
| <b>Grado 3</b> | >6 episodios en 24h, indicada fluidoterapia o NPT >24h. |
| <b>Grado 4</b> | Potencialmente mortal                                   |

**2.c. Mucositis**

|                |                                                                          |
|----------------|--------------------------------------------------------------------------|
| <b>Grado 1</b> | <b>Eritema, dolor moderado, úlceras no dolorosas.</b>                    |
| <b>Grado 2</b> | Eritema con edema y úlceras dolorosas pero que permiten la ingesta oral. |
| <b>Grado 3</b> | No es posible la ingesta oral                                            |
| <b>Grado 4</b> | Precisa soporte enteral o NPT                                            |

**2.d. Diarrea**

|                |                                                                                     |
|----------------|-------------------------------------------------------------------------------------|
| <b>Grado 1</b> | <b>Aumento del nº de deposiciones, pero no más de 4/día</b>                         |
| <b>Grado 2</b> | Entre 4-6 deposiciones/día o presentación nocturna                                  |
| <b>Grado 3</b> | Más de 7 deposiciones/día, signos de deshidratación o necesidad de fluidoterapia iv |
| <b>Grado 4</b> | Signos de deshidratación severa con repercusión hemodinámica                        |

**2.e. Alteración de transaminasas (GOT, GPT, FA)**

|             |           |           |          |
|-------------|-----------|-----------|----------|
| <b>1</b>    | <b>2</b>  | <b>3</b>  | <b>4</b> |
| >VN -3 x VN | >3-5 x VN | 5-20 x VN | >20 x VN |

\*VN: Valores normales de laboratorio

## Soporte nutricional y cribado

### I. HISTORIA CLÍNICA Y EXAMEN FÍSICO:

Cuidadosa anamnesis que incluya los antecedentes personales y familiares del paciente, sus hábitos tóxicos, medicación domiciliaria e historia dietética y ponderal (peso habitual, peso actual y pérdida de peso), prestando especial interés en la presencia de síntomas digestivos. Dentro del examen físico general, se incluirá la inspección de piel y faneras, la presencia de edema y la medición de peso, talla y así, cálculo de Índice de Masa Corporal (IMC).

### II. LABORATORIO:

Proteínas viscerales (albúmina, prealbúmina, transferrina y ferritina), ac. Fólico, vitamina B12, proteína C reactiva.

### III. CRIBADO

**Nutriscore** (anexo 1):

A los pacientes no derivados/no captados directamente por Nutrición desde los Comités correspondientes, se les realizará el cribado nutricional preferentemente en la primera consulta con el oncólogo médico o en su defecto, el día que reciban el primer ciclo de quimioterapia. Posteriormente y según el tipo de tumor:

- Colo-recto
  - Día 1 de cada ciclo
  - Mitad de tratamiento
  - Al finalizar el tratamiento con quimioterapia
- Cabeza y cuello, gástrico, de la unión G-E, páncreas y vías biliares
  - Día 1 de todos los ciclos de quimioterapia\*.
  - Último día del último ciclo
  - Al mes tras finalizar el tratamiento
- Cáncer de mama
  - Día 1 de los ciclos 1\*, 4 y 8
  - Último día del último ciclo
- Resto de pacientes
  - Día 1 de cada ciclo.
  - Último día del último ciclo

*\* La valoración del día 1 del ciclo 1 puede omitirse si en el mes previo al inicio del tratamiento sistémico el paciente ha tenido consulta con Nutrición.*

### IV. VALORACIÓN DEL ESTADO NUTRICIONAL

**Valoración Global Subjetiva Generada por el paciente (VSG-GP)** (anexo 2).

Todos los pacientes que presenten riesgo de desnutrición tras la realización del método de cribado (puntuación mayor o igual a 5 en Nutriscore), deben de completar el diagnóstico nutricional con esta herramienta. Así clasificamos al paciente dentro de uno de los siguientes grupos.

- **Grupo A: adecuado estado nutricional** → Recomendaciones nutricionales generales y/o específicas, que se deberán aportar por escrito al paciente.
  - Las **recomendaciones dietéticas generales** serán aquellas que se dirijan a pacientes con una función digestiva correcta y con apetito conservado (anexo 3). Incluyen información nutricional básica y recomendaciones dietéticas dirigidas a la relación de una dieta tradicional, saludable, equilibrada y adecuada a las necesidades del paciente, gustos y sintomatología.
  - Las **recomendaciones nutricionales específicas**, se aplicarán siempre que el paciente sea capaz de ingerir, como mínimo, el 75% de los requerimientos nutricionales que le corresponden (anexo 4). Serán las recomendaciones dirigidas a aquellos pacientes que necesiten una alimentación mas específica y calibrada en nutrientes, bien por su estado nutricional o para mejora del control de efectos adversos derivados del tratamiento. Se entregarán recomendaciones específicas para: *náuseas y vómitos, diarrea, estreñimiento general, estreñimiento con riesgo de obstrucción, hiporexia, mucositis, alteraciones del gusto, el olfato y xerostomía.*
- **Grupo B: riesgo de desnutrición moderada** → Derivación preferente al servicio de Nutrición para la elaboración de un plan nutricional individualizado y ajustado a las necesidades del paciente, que incluya calculo de requerimientos, tratamiento nutricional específico y plan de seguimiento.
- **Grupo C: riesgo de desnutrición severa** → Derivación preferente al servicio de Nutrición para la elaboración de un plan nutricional individualizado y ajustado a las necesidades del paciente, que incluya calculo de requerimientos, tratamiento nutricional específico y plan de seguimiento. Estos pacientes presentan *per sé* indicación de nutrición enteral.

## **VI. CALIDAD DE VIDA.**

Se empleará el **cuestionario FACT-G** (anexo 5), a cumplimentar en el momento en el que se inicie el abordaje nutricional y al finalizar el tratamiento antineoplásico.

## **VII. INDICACIONES DE NUTRICIÓN ARTIFICIAL**

### **VII.a. SUPLEMENTOS NUTRICIONALES**

- Pueden ser fórmulas completas o no (en función de que aporten o no todos los nutrientes necesarios para servir como única fuente de nutrientes), y no son necesariamente equilibradas.
- Están indicados cuando el paciente a pesar de las recomendaciones dietéticas generales y específicas, solo es capaz de ingerir entre el 75% y el 50% de sus requerimientos durante > 5 días seguidos.
- Se aconsejan que tengan una alta densidad calórica que supere las 1,5 - 2 kcal/ml y que sean a su vez hiperproteicos. Asimismo, pueden recomendarse aquellos enriquecidos con ácidos grasos omega 3.
- En pacientes oncológicos que serán sometidos a cirugía oncológica se recomienda el uso de fórmulas inmunomoduladoras de 5 a 7 días antes de la intervención (por ej. IMPACT®).

- Complementan la dieta habitual, pero no deben sustituirla.
- Puede ser de gran utilidad entregar al paciente, consejos de forma escrita sobre la forma más óptima de uso (anexo 6).

#### VII.b. NUTRICION ENTERAL

- La nutrición enteral (NE) por sonda está indicada en pacientes que son incapaces de ingerir las cantidades adecuadas de nutrientes para cubrir sus requerimientos nutricionales (< 50% requerimientos nutricionales) y tienen un tracto gastrointestinal funcionando (anexo 7 con recomendaciones generales para su administración).

#### VII.c. NUTRICION PARENTERAL

- Pacientes con malnutrición moderada/severa en los que la NE no sea factible o no sea tolerada.
- Pacientes con complicaciones postoperatorias que alteren la función gastrointestinal haciéndoles incapaces de recibir y absorber una adecuada cantidad de nutriciones por vía oral o enteral, al menos durante  $\geq 7$  días.
- Cuando se prevé que el paciente estará sin alimentarse durante > de 10 días.
- Cuando el paciente está gravemente desnutrido.
- Tumores muy sensibles al tratamiento sistémico cuando no se pueda utilizar la vía oral o enteral para alimentar al paciente (por ej. Mucositis graves).
- Indicaciones absolutas:
  - Síndrome de intestino corto.
  - Enteritis rdica grave.
  - Fstulas digestivas de alto dbito.
  - Vmitos intratables.
- Tipos de nutricin parenteral:
  - **NP perifrica:** Se administra por via perifrica del brazo. Es el caso del conocido isoplasma<sup>®</sup>. Suelen ser soluciones de aminocidos, glucosa y lpidos poca concentradas, por lo que es muy difcil administrar los nutrientes necesarios en un volumen inferior a 2500-3000 ml. Por ello suelen ser hipocalricos, por lo que no cubren los requerimientos de energa del sujeto, y deben utilizarse durante pocos das o como complemento a una alimentacin oral o enteral.
  - **NP central:** A travs de un catter implantado en una vena central (yugular o subclavia). Suele ser nutricin parenteral total.

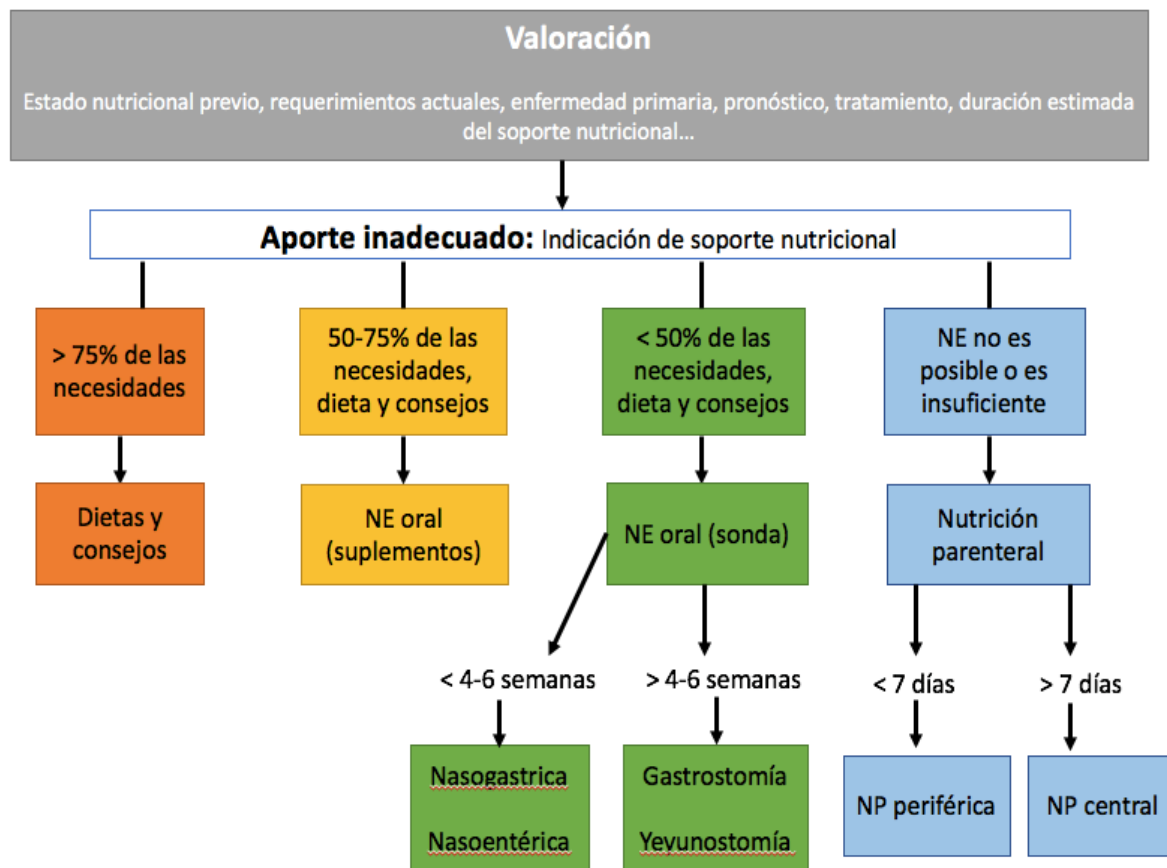

#### ANEXO 1. CRIBADO NUTRICIONAL EN EL PACIENTE ONCOLÓGICO (NUTRISCORE)

PACIENTE:

NHC:

FECHA DEL CRIBADO:

| 1. NUTRISCORE                                                     |   |
|-------------------------------------------------------------------|---|
| A. ¿HA PERDIDO PESO DE FORMA INVOLUNTARIA EN LOS ÚLTIMOS 3 MESES? |   |
| No                                                                | 0 |
| No estoy seguro                                                   | 2 |
| <i>Si la respuesta es sí, ¿cuánto peso (kg) ha perdido?</i>       |   |
| De 1 a 5                                                          | 1 |
| De 6 a 10                                                         | 2 |
| De 11 a 15                                                        | 3 |
| Más de 15                                                         | 4 |
| No estoy seguro                                                   | 2 |
| B. ¿HA ESTADO COMIENDO MENOS POR DISMINUCIÓN DEL APETITO?         |   |
| No                                                                | 0 |
| Sí                                                                | 1 |
| <b>TOTAL:</b>                                                     |   |

## Soporte nutricional y cribado

| 2. LOCALIZACIÓN NEOPLASIA                                                               | RIESGO NUTRICIONAL | PUNTUACIÓN |
|-----------------------------------------------------------------------------------------|--------------------|------------|
| Cabeza y cuello<br>Tracto digestivo superior: esófago, gástrico, páncreas o intestinal. | Alto*              | 2          |
| Pulmón<br>Abdominal y pelvis: hígado, vías biliares, renal, ovarios o endometrio.       | Medio              | 1          |
| Mama, SNC, Vejiga, Próstata<br>Colorrectal<br>Leucemias, otros linfomas<br>Otros        | Bajo               | 0          |
| <b>TOTAL:</b>                                                                           |                    |            |

| 3. TRATAMIENTO                                                                                                          | SÍ | NO |
|-------------------------------------------------------------------------------------------------------------------------|----|----|
| Quimioterapia-Radioterapia concomitante                                                                                 | 2  | 0  |
| Radioterapia hiperfraccionada                                                                                           | 2  | 0  |
| Trasplante de progenitores hematopoyéticos                                                                              | 2  | 0  |
| Quimioterapia <sup>a</sup>                                                                                              | 1  | 0  |
| Radioterapia <sup>b</sup> (únicamente)                                                                                  | 1  | 0  |
| Otros tratamientos (ITK, Ac monoclonales, antiangiogénicos, hormonoterapia, tratamiento de soporte como corticoides...) | 0  | 0  |
| <b>TOTAL:</b>                                                                                                           |    |    |

|                                                                       |
|-----------------------------------------------------------------------|
| <b>PUNTUACIÓN TOTAL:</b>                                              |
| PUNTUACIÓN $\geq 5$ : el paciente se encuentra en riesgo nutricional. |

\* Repetir el cribado semanalmente en aquellos pacientes de alto riesgo nutricional.

<sup>a</sup> Se considera desde el inicio hasta 3 semanas después del último ciclo, incluyendo retrasos entre ciclos.

<sup>b</sup> Se considera desde el inicio hasta 2 semanas después de terminar el tratamiento.

**ANEXO 2. VALORACION GLOBAL SUBJETIVA GENERADA POR EL PACIENTE.**

Fig. 2—Valoración Global Subjetiva Generada por el Paciente (GP-VSG):

**HISTORIAL****A RELLENAR EXCLUSIVAMENTE POR EL PACIENTE**

|                                                                                                                                                                                                                                                                                                                                                                                                                                                                                                                                                                                                                                                                                                                                                                                                                                                                                                                                                                                     |                                                                                                                                                                                                                                                                                                                                                                                                                                                                                                                                                                                                                                                                                                                                                                                                                                         |
|-------------------------------------------------------------------------------------------------------------------------------------------------------------------------------------------------------------------------------------------------------------------------------------------------------------------------------------------------------------------------------------------------------------------------------------------------------------------------------------------------------------------------------------------------------------------------------------------------------------------------------------------------------------------------------------------------------------------------------------------------------------------------------------------------------------------------------------------------------------------------------------------------------------------------------------------------------------------------------------|-----------------------------------------------------------------------------------------------------------------------------------------------------------------------------------------------------------------------------------------------------------------------------------------------------------------------------------------------------------------------------------------------------------------------------------------------------------------------------------------------------------------------------------------------------------------------------------------------------------------------------------------------------------------------------------------------------------------------------------------------------------------------------------------------------------------------------------------|
| <p><b>1. Peso:</b><br/>Consideraciones sobre mi peso actual y sobre la evolución de mi peso en las últimas semanas:<br/>En la actualidad peso alrededor de _____ kilos<br/>Mido aproximadamente _____ cm<br/>Hace un mes pesaba alrededor de _____ kilos<br/>Hace seis meses pesaba alrededor de _____ kilos<br/>Durante las dos últimas semanas mi peso:<br/>o ha disminuido <sup>(1)</sup> o no ha cambiado <sup>(0)</sup> o ha aumentado <sup>(0)</sup><br/><br/>(ver <i>Tabla 1</i> en la hoja de instrucciones) <span style="float: right;"><input type="text"/> 1</span></p>                                                                                                                                                                                                                                                                                                                                                                                                  | <p><b>2. Ingesta:</b> en comparación con mi estado habitual, calificaría a mi alimentación durante el último mes de:<br/>sin cambios <sup>(0)</sup><br/>mayor de lo habitual <sup>(0)</sup><br/>menor de lo habitual <sup>(1)</sup><br/>Ahora como:<br/>alimentos normales pero en menor cantidad de lo habitual <sup>(1)</sup><br/>pocos alimentos sólidos <sup>(2)</sup><br/>solamente líquidos <sup>(2)</sup><br/>solamente suplementos nutricionales <sup>(3)</sup><br/>muy poco <sup>(4)</sup><br/>solamente alimentación por sonda o intravenosa <sup>(0)</sup> <span style="float: right;"><input type="text"/> 2</span><br/><br/>(consignar como marcador final la condición de más alta puntuación)</p>                                                                                                                        |
| <p><b>3. Síntomas:</b> he tenido los siguientes problemas que me han impedido comer lo suficiente durante las últimas dos semanas (marcar según corresponda):<br/>no tengo problemas con la alimentación <sup>(0)</sup><br/>falta de apetito; no tenía ganas de comer <sup>(3)</sup><br/>náusea <sup>(1)</sup> vómitos <sup>(3)</sup><br/>estreñimiento <sup>(1)</sup> diarrea <sup>(3)</sup><br/>llagas en la boca <sup>(2)</sup> sequedad de boca <sup>(1)</sup><br/>los alimentos me saben raros o no me saben a nada <sup>(1)</sup><br/>problemas al tragar <sup>(2)</sup> los olores me desagradan <sup>(1)</sup><br/>me siento lleno/a enseguida <sup>(1)</sup><br/>dolor; dónde? <sup>(3)</sup> _____<br/>otros factores** <sup>(1)</sup> _____ <span style="float: right;"><input type="text"/> 3</span><br/><br/>** como: depresión, problemas dentales, económicos<br/>(sumar las puntuaciones correspondientes a cada uno de los síntomas indicados por el paciente)</p> | <p><b>4. Capacidad Funcional:</b> en el curso del último mes calificaría mi actividad, en general, como:<br/>normal y sin limitaciones <sup>(0)</sup><br/>no totalmente normal, pero capaz de mantenerme activo y llevar a cabo actividades bastante normales <sup>(1)</sup><br/>sin ganas de hacer la mayoría de las cosas, pero paso menos de la mitad del día en la cama o sentado/a <sup>(2)</sup><br/>capaz de realizar pequeñas actividades y paso la mayor parte del día en la cama o sentado/a <sup>(3)</sup><br/>encamado/a, raramente estoy fuera de la cama <sup>(3)</sup><br/><br/>(consignar como marcador final la condición de más alta puntuación) <span style="float: right;"><input type="text"/> 4</span><br/><br/>Suma de las Puntuaciones: 1+2+3+4 = <span style="float: right;"><input type="text"/> A</span></p> |

El resto de este formulario será completado por su médico. Gracias.

|                                                                                                                                                                                                                                                                                                                                                                                                        |                                                                                                                                                                                                    |
|--------------------------------------------------------------------------------------------------------------------------------------------------------------------------------------------------------------------------------------------------------------------------------------------------------------------------------------------------------------------------------------------------------|----------------------------------------------------------------------------------------------------------------------------------------------------------------------------------------------------|
| <p><b>1. Enfermedad y su relación con los requerimientos nutricionales</b> <span style="float: right;">(ver <i>Tabla 2</i> en la hoja de instrucciones)</span><br/>Diagnóstico principal (especificar) _____<br/>Estado de la enfermedad (indicar el estadio si se conoce o el más próximo a él): I II III IV Otro: _____<br/>Edad _____ <span style="float: right;">B <input type="text"/></span></p> |                                                                                                                                                                                                    |
| <p><b>6. Demanda Metabólica</b> <span style="float: right;"><input type="text"/> C (ver <i>Tabla 3</i> en las instrucciones)</span><br/>sin estrés metabólico      estrés metabólico leve<br/>estrés metabólico moderado      estrés metabólico elevado</p>                                                                                                                                            | <p>Puntuación Numérica <i>Tabla 2</i> = <input type="text"/> B<br/>Puntuación Numérica <i>Tabla 3</i> = <input type="text"/> C<br/>Puntuación Numérica <i>Tabla 4</i> = <input type="text"/> D</p> |
| <p><b>7. Evaluación física</b> <span style="float: right;"><input type="text"/> D (ver <i>Tabla 4</i> en las instrucciones)</span></p>                                                                                                                                                                                                                                                                 |                                                                                                                                                                                                    |
| <p><b>Evaluación Global (VGS A, B o C)</b><br/>Bien nutrido<br/>Moderadamente o sospechosamente mal nutrido<br/>Severamente mal nutrido<br/>(ver <i>Tabla 5</i> en la hoja de instrucciones)</p>                                                                                                                                                                                                       | <p><b>Puntuación Numérica Total: A+B+C+D</b><br/>(ver recomendaciones abajo) <span style="float: right;"><input type="text"/></span></p>                                                           |

Firma: \_\_\_\_\_ Fecha: \_\_\_\_\_

**Recomendaciones Nutricionales:** La valoración cuantitativa del estado nutricional del paciente sirve para definir en qué casos se recomienda intervención nutricional incluyendo: educación nutricional del paciente y familiares, manejo de síntomas, intervención farmacológica e intervención nutricional apropiada. Una apropiada intervención nutricional requiere un apropiado manejo de los síntomas del paciente.

**0-1** No requiere intervención nutricional en este momento. Volver a valorar durante el tratamiento.

**2-3** Paciente y familiares requieren educación nutricional por parte de especialista en nutrición u otro clínico, con intervención farmacológica según los síntomas (recuadro 3) y la analítica del paciente.

**4-8** Requiere intervención de un especialista en nutrición junto con su médico/oncólogo según los síntomas indicados en el recuadro 3.

**9** Indica una necesidad crítica de mejorar el manejo de los síntomas del paciente y/o intervención nutricional/farmacológica.

© FD Ottery, 2000.



Fig. 3.—INSTRUCCIONES: Hoja de Recogida de Datos y Tablas para la Cuantificación de la Encuesta de Valoración Global Subjetiva Generada por el Paciente (VGS-GP)

La valoración numérica final de la VGS-GP proviene de las puntuaciones totales obtenidas en los apartados A, B, C y D al dorso. Los recuadros 1-4 deben ser completados por el paciente. Las puntuaciones correspondientes a esos recuadros vienen indicadas entre paréntesis. La siguiente hoja sirve como ayuda para valorar cuantitativamente las diversas secciones de que consta la encuesta.

TABLA 1 - Cuantificación de la Pérdida de Peso

Sumando puntos se determinan la pérdida aguda y subaguda de peso. **Subaguda:** si se dispone de los datos de pérdida de peso durante el último mes, añadir los puntos obtenidos a los puntos correspondientes a la pérdida de peso aguda. Solo incluir la pérdida de peso de 6 meses si no se dispone de la del último mes. **Aguda:** se refiere a los cambios de peso en las últimas dos semanas; **añadir 1 punto al marcador de subaguda si el paciente ha perdido peso, no añadir puntos si el paciente ha ganado o mantenido su peso durante las 2 últimas semanas**

| Pérdida peso en 1 mes | Puntos | Pérdida peso en 6 meses |
|-----------------------|--------|-------------------------|
| 10% o superior        | 4      | 20% o superior          |
| 5-9,9%                | 3      | 10-19,9%                |
| 3-4,9%                | 2      | 6-9,9%                  |
| 2-2,9%                | 1      | 2-5,9%                  |
| 0-1,9%                | 0      | 0-1,9%                  |

Puntuación Total Tabla 1 = Subaguda + Aguda =  A

TABLA 2 — Criterios de cuantificación de Enfermedad y/o Condiciones: La puntuación se obtiene adjudicando 1 punto a cada una de las condiciones indicadas abajo, que se correspondan con el diagnóstico del paciente:

| Categoría                                       | Puntuación |
|-------------------------------------------------|------------|
| • Cáncer                                        | 1          |
| • SIDA                                          | 1          |
| • Caquexia Cardíaca o Pulmonar                  | 1          |
| • Úlcera por decúbito, herida abierta o fístula | 1          |
| • Existencia de Trauma                          | 1          |
| • Edad superior a 65 años                       | 1          |

Puntuación Total Tabla 2 =  B

TABLA 3 - Cuantificación del Estrés Metabólico

La valoración del estrés metabólico se determina mediante una serie de variables conocidas cuya presencia produce un incremento de las necesidades calóricas y proteícas del individuo. Esta puntuación es **aditiva** de forma que un paciente con fiebre superior a 39 °C (suma 3 puntos) y si está siendo tratado con 10 mg de prednisona de forma crónica (suma 2 puntos más), lo que hace un total de 5 puntos para el paciente en esta sección.

| Estrés                | Ninguno (0)    | Leve (1)                                                 | Moderado (2)                                                        | Elevado (3)                                                            |
|-----------------------|----------------|----------------------------------------------------------|---------------------------------------------------------------------|------------------------------------------------------------------------|
| Fiebre                | sin fiebre     | 37 y < 38 °C                                             | 38 y < 39 °C                                                        | 39 °C                                                                  |
| Duración de la fiebre | sin fiebre     | < 72 horas                                               | 72 horas                                                            | > 72 horas                                                             |
| Esteroides            | sin esteroides | dosis bajas<br>(< 10 mg prednisona<br>o equivalente/día) | dosis moderadas<br>(> 10 y < 30 mg prednisona<br>o equivalente/día) | altas dosis de esteroides<br>(≥ 30 mg prednisona<br>o equivalente/día) |

Puntuación total de la Tabla 3 =  C

TABLA 4 - Reconocimiento Físico

El reconocimiento físico del paciente incluye una evaluación subjetiva de tres aspectos de la composición corporal: tejido graso, masa muscular y estatus hídrico. Ya que se trata de una valoración subjetiva, cada aspecto del examen es cuantificado por grado de deficiencia. Déficit musculares impactan más en la puntuación final que déficit de tejido graso. Definición de categorías: 0 = sin déficit, 1+ = déficit leve, 2+ = déficit moderado, 3+ = déficit severo. Las puntuaciones en estas categorías **no son aditivas**, pero son utilizadas para establecer clínicamente el grado de la deficiencia (ej.: presencia o ausencia de fluidos)

|                                                  |          |           |           |           |                                                                                                                                                                                                                                                                                                                            |            |           |           |           |
|--------------------------------------------------|----------|-----------|-----------|-----------|----------------------------------------------------------------------------------------------------------------------------------------------------------------------------------------------------------------------------------------------------------------------------------------------------------------------------|------------|-----------|-----------|-----------|
| <b>Tejido Graso:</b>                             |          |           |           |           | <b>Estatus Hídrico:</b>                                                                                                                                                                                                                                                                                                    |            |           |           |           |
| Grasa en orbitales parpebrales                   | 0        | 1+        | 2+        | 3+        | Edema de tobillo                                                                                                                                                                                                                                                                                                           | 0          | 1+        | 2+        | 3+        |
| Pliegue tricipital                               | 0        | 1+        | 2+        | 3+        | Edema de sacro                                                                                                                                                                                                                                                                                                             | 0          | 1+        | 2+        | 3+        |
| Acúmulos grasos en la cintura                    | 0        | 1+        | 2+        | 3+        | Ascitis                                                                                                                                                                                                                                                                                                                    | 0          | 1+        | 2+        | 3+        |
| <b>Déficit Graso Global</b>                      | <b>0</b> | <b>1+</b> | <b>2+</b> | <b>3+</b> | <b>Estatus Hídrico Global</b>                                                                                                                                                                                                                                                                                              | <b>0</b>   | <b>1+</b> | <b>2+</b> | <b>3+</b> |
| <b>Estatus Muscular:</b>                         |          |           |           |           | La evaluación cuantitativa global del estado físico del paciente se determina mediante una valoración global subjetiva de todos los déficit corporales que presente el paciente teniendo en cuenta que <b>las deficiencias musculares pesan más que los déficit del tejido graso y éstos más que el exceso de fluidos.</b> |            |           |           |           |
| Músculos temporales                              | 0        | 1+        | 2+        | 3+        |                                                                                                                                                                                                                                                                                                                            |            |           |           |           |
| Clavículas (pectorales y deltoides)              | 0        | 1+        | 2+        | 3+        |                                                                                                                                                                                                                                                                                                                            |            |           |           |           |
| Hombros (deltoides)                              | 0        | 1+        | 2+        | 3+        |                                                                                                                                                                                                                                                                                                                            |            |           |           |           |
| Músculos interóseos                              | 0        | 1+        | 2+        | 3+        |                                                                                                                                                                                                                                                                                                                            |            |           |           |           |
| Escápula (latissimus dorsi, trapecio, deltoides) | 0        | 1+        | 2+        | 3+        | Sin déficit                                                                                                                                                                                                                                                                                                                | = 0 puntos |           |           |           |
| Cuádriceps                                       | 0        | 1+        | 2+        | 3+        | Déficit leve                                                                                                                                                                                                                                                                                                               | = 1 punto  |           |           |           |
| Gastronemios                                     | 0        | 1+        | 2+        | 3+        | Déficit moderado                                                                                                                                                                                                                                                                                                           | = 2 puntos |           |           |           |
| <b>Estatus Muscular Global</b>                   | <b>0</b> | <b>1+</b> | <b>2+</b> | <b>3+</b> | Déficit severo                                                                                                                                                                                                                                                                                                             | = 3 puntos |           |           |           |

Puntuación Total Tabla 4 =

TABLA 5- Valoración Global Subjetiva del Estado Nutricional del Paciente. Categorías

|                                         | Estado A                                                                 | Estado B                                                                                                 | Estado C                                                                                         |
|-----------------------------------------|--------------------------------------------------------------------------|----------------------------------------------------------------------------------------------------------|--------------------------------------------------------------------------------------------------|
| Categoría                               | Bien nutrido                                                             | Moderadamente malnutrido o sospechosamente malnutrido                                                    | Severamente malnutrido                                                                           |
| Peso                                    | Sin pérdida de peso o sin retención hídrica reciente                     | ≈ 5% pérdida de peso en el último mes (o 10% en 6 meses). Peso no estabilizado                           | a) >5% pérdida de peso en 1 mes (o >10% en 6 meses)<br>b) Peso sin estabilizar                   |
| Ingesta                                 | Sin déficit o Mejora significativa reciente                              | Disminución significativa en la ingesta                                                                  | Déficit severo en la ingesta                                                                     |
| Impacto de la Nutrición en los Síntomas | Ninguno o Mejora significativa reciente permitiendo una ingesta adecuada | Existe Impacto de la Nutrición en los Síntomas (Sección 3 de la VGS-GP)                                  | Existe Impacto de la Nutrición en los Síntomas (Sección 3 de la VGS-GP)                          |
| Funcionalidad                           | Sin afectación o Mejora reciente significativa                           | Deterioro Moderado o Deterioro reciente de la misma                                                      | Deterioro severo o Deterioro reciente significativo                                              |
| Exámen Físico                           | Sin déficit o Deficiencia crónica pero con reciente mejoría clínica      | Evidencia de pérdida de leve a moderada de masa grasa y/o masa muscular y/o tono muscular a la palpación | Signos evidentes de malnutrición (ej.: pérdida severa de tejidos graso, muscular, posible edema) |

Evaluación Global (A, B, o C) =

### **ANEXO 3. Recomendaciones nutricionales generales (*World Cancer Research Fund* y el *American Institute for Cancer Research (WCRF/AICR)*)**

- Evitar el aumento de peso y el aumento de la circunferencia de la cintura durante toda la vida. Para ello conviene disminuir la densidad energética de la dieta procurando no sobrepasar las 125 kcal/100 gramos, realizar actividad física moderada al menos 30 minutos diarios y aumentar hasta llegar a 60 minutos diarios de actividad moderada o 30 minutos diarios de actividad física de mayor intensidad.
- Limitar el sedentarismo.
- Reducir el consumo de bebidas carbonatadas.
- Restringir o evitar la “comida rápida”.
- Consumir diariamente 5 raciones (mas de 600 gramos) de hortalizas y verduras poco feculentas y variadas, cereales mínimamente procesados o sin procesar, y legumbres, de modo que se garantice el aporte de al menos 25 gramos diarios de polisacáridos no feculentos.
- Limitar el consumo de proteínas animales; si se consumen carnes rojas no superar la cantidad de 300 gramos a la semana y disminuir o eliminar el consumo de carnes procesadas (curado, ahumado, etc).
- Si se consume alcohol, no superar la cantidad de dos unidades diarias en el caso de los hombres y de una en el caso de las mujeres (1 unidad = 10-15 gramos de alcohol).
- Restringir o evitar los alimentos conservados en salazón o salmuera y los que tengan mucha sal, para que la ingesta diaria sea inferior a 5 gramos de sal.
- Fraccionar la dieta en un mínimo de 4 comidas: desayuno, almuerzo, merienda y cena. Un vaso de leche o yogur antes de acostarse, si se tolera bien, puede ayudar a lograr mayor aporte calórico y proteico.
- Cocinar con poca grasa: al vapor, hervidos, al horno, en el microondas, al papillote, guisos suaves o a la plancha.
- Limitar el consumo de grasas de origen animal.
  - Elegir de segundo plato preferentemente pescado.
  - Las carnes magras o blancas (pollo, ternera magra, lomo de cerdo o conejo) pueden consumirse con mayor frecuencia que las carnes más grasas.
  - Consumir los lácteos semidesnatados (2-3 raciones/día).
- Asegurar pescado azul 2-3 veces por semana, siempre que sea bien tolerado.
- Consumir legumbres de 2-3 veces por semana. Pueden triturarse para facilitar su digestión.
- Asegurar de 2 a 3 piezas de fruta al día.
- Consumir alimentos frescos respetando la estacionalidad de los mismos. Si los vegetales crudos sientan mal, puede recomendarse su ingesta en forma licuada.
- Sustituir los alimentos que sienten mal por otros del mismo grupo de alimentos. Por ej. Si la leche es mal tolerada, probar tolerancia al yogur o a la leche sin lactosa.
- Beber de 6-8 vasos de líquido al día (agua, infusiones, caldos, zumos naturales).

- Manipulación higiénica de los alimentos
  - Lavarse bien las manos antes de cocinar y comer.
  - Lavar las frutas y verduras antes de pelarlas.
  - Guardar los alimentos en la nevera bien tapados.
- Evitar alimentos asociados a toxiinfecciones alimentarias
  - Huevo, carne o pescado crudos.
  - Marisco que sea cocinado al vapor.
  - Lácteos no pasteurizados ni uperizados.
- Mantener una buena higiene oral
  - Lavarse los dientes con un cepillo suave y enjuagarse la boca antes y después de cada comida con infusión de tomillo.

#### ANEXO 4. Recomendaciones nutricionales específicas

##### 1. ANOREXIA (*falta ó nulo apetito*)

- Aprovechar el momento del día en que se tenga más apetito para tomar los alimentos con alto contenido en energía y proteínas.
- Evitar saltarse comidas. Es importante realizar comidas frecuentes y de poco volumen (desayuno, media mañana, camina, merienda, cena y colación antes de acostarse)
- Tomar un vaso pequeño de zumo de cítricos antes de las comidas. Es importante evitar el zumo de pomelo por las numerosas interacciones fármaco-nutriente que presenta.
- Caminar antes de las comidas puede estimular el apetito.
- Preparar un plato único donde estén representados el primer y el segundo plato. Siempre deberán estar presentes verduras, farináceos y proteínas de alto valor biológico (carne, pescado, lácteos o huevos).
- Propiciar la compañía durante las comidas. Cuando se coma solo, escuchar la radio o ver la televisión.
- Llevar siempre a mano tentempiés, para tomarlos entre horas: frutos secos, galletas, batidos.
- Beber líquidos a pequeños sorbos a lo largo del día, siendo preferible tomarlos fuera de las comidas.
- Si se despierta durante la noche, aprovechar para tomar líquidos que aporten energía y proteínas leche, yogur líquidos o batidos.
- Preparar los platos de forma variada y apetecible, buscando diferentes texturas y colores.
- Cuando la carne o el pescado sean rechazados, sustituirlos por huevos o lácteos.
- Tener comidas preparadas en la nevera y el congelador en porciones individuales.
- Enriquecer las comidas con alimentos que aporten gran cantidad de calorías y proteínas:
  - Sopas y purés
    - Queso rallado
    - Leche en polvo

- Huevo duro
- Legumbres
- Jamón
- Pavo
- Pollo troceado
- Pescado
- Primeros platos
  - Queso
  - Mayonesa comercial
  - Atún
  - Clara de huevo cocida
  - Frutos secos
  - Trocicos de jamón
- Postres
  - Crema
  - Frutos secos
  - Miel
  - Mermelada
  - Helados
- Leche
  - Leche en polvo
  - Miel
  - Fruta en almíbar
  - Helado
  - Fruta para hacer batidos

## 2. HIPOGEUSIA (*sabor de los alimentos disminuido*)

- Condimentar (durante la preparación) los alimentos con hierbas y especias con el fin de aumentar su sabor y aroma.
- Utilizar potenciadores de sabor como el aceite de oliva o la salsa de soja.
- Tomar los alimentos con salsas o caldos para potenciar su sabor.
- Evitar ingerir los alimentos muy fríos o muy calientes.
- Adobar la carne y el pescado.
- Elegir sabores fuertes como el queso curado o el jamón.
- Suprimir el tabaco y el alcohol, ya que resecan la boca y es más difícil apreciar el sabor

## 3. DISGEUSIA (*alteración en el sabor de los alimentos*)

- Evitar los alimentos que aumenten el sabor metálico según tolerancia individual.

- Si se percibe sabor metálico, utilizar cubiertos de plástico para comer y utensilios de madera o barro para cocinar.
- Probar platos con contrastes de sabores: dulce y salado, agrio y dulce...
- Añadir unas gotas de limón o de sirope de frutas si encuentra un sabor desagradable al agua.
- Si no se toleran las carnes rojas, sustituirlas por pollo o pavo, conejo, huevos, queso, tofu, legumbres y cereales.
- Tomar preferiblemente alimentos fríos o temperatura ambiente: cremas, batidos, ensaladas de arroz o pasta.
- Evitar el sabor amargo (café, té, chocolate), el metálico (edulcorantes artificiales) y alimentos con sabores y olores muy intensos.
- Tomar fruta ácida (naranja, kiwi, mandarina, fresa, limón) para ayudar a que desaparezca el sabor metálico.
- Aumentar el consumo de alimentos ricos en zinc (mariscos, cereales de desayuno, pan integral, legumbres, hígado, carnes, pescados, espinacas) y/o suplementar con sulfato de zinc.
- Mantener una buena higiene bucodental.

#### 4. ALTERACIONES DEL OLFATO

- Ventilar la habitación antes de comer.
- Emplear cocciones que no desprendan mucho olor, como hervidos, al papillote o en el microondas.
- Comer los alimentos templados o más bien fríos para evitar que desprendan olor y disminuir su sabor.
- Evitar los alimentos muy olorosos (coles, espárragos, ciertos pescados).
- La carne y el pescado hervidos desprenden menos olor que cocinados a la plancha, parrilla, horno.
- Cocinar con condimentos suaves, como la albahaca, la menta, el orégano, el romero, el tomillo, el laurel, el hinojo.

#### 5. VOMITOS/NAÚSEAS

- Comer despacio y masticar bien los alimentos.
- Realizar comidas frecuentes y de poco volumen.
- Los alimentos secos se toleran mejor: bocadillos, palitos de pan, galletas, tostadas.
- Preparar un plato único donde estén representados el primer y el segundo plato. Siempre deberán estar presentes verduras, farináceos y proteínas de alto valor biológico (carne, pescado, lácteos o huevos).
- Elegir alimentos con bajo contenido en grasas: carnes blancas, embutidos magros, pescado blanco, lácteos desnatados o quesos con bajo contenido en grasa.
- Escoger platos y cocciones que requieran poca grasa para su elaboración (horno, plancha, hervido, papillote).
- Evitar los alimentos fritos, muy dulces o muy condimentados.
- Son mejor tolerados los alimentos templados o a temperatura ambiente, que los muy fríos o muy calientes.
- Las frutas y verduras cocidas son mejor toleradas que las crudas.

- Tomar los líquidos o bebidas entre comidas (agua, infusiones, gelatinas). Las bebidas carbonatadas, tomadas a pequeños sorbos facilitan la digestión (por ej. Bebidas de cola, gaseosa, agua con gas).
- Cocinar con especias e hierbas suaves como la canela, la menta, el tomillo, la albahaca, el laurel o el jengibre.
- Mantener el ambiente fresco, bien ventilado y libre de olores.
- Reposar incorporado después de las comidas. No acostarse de inmediato.
- Usar ropa holgada, que no proima ni la cintura ni el abdomen.
- Mantener la higiene bucal, lavarse los dientes o hacer enjuagues bucales después de cada vómito.

## 6. DIARREA

- Realizar comidas frecuentes y de poco volumen.
- Suprimir los alimentos con alto contenido de fibra insoluble.
- Evitar la ingesta de alimentos a temperaturas extremas (demasiado calientes o frías)
- Retirar el azúcar (moderar el consumo) y grandes cantidades de edulcorantes.
- Suprimir especias e irritantes.
- Suprimir la leche y sus derivados. Propuesta: cambiar leche por yogur desnatado o por leche sin lactosa desnatada.
- Hidratar adecuadamente.

## 7. ESTREÑIMIENTO

- Incrementar el aporte de fibra en los alimentos.
- Ingerir líquidos abundantes y asegurar un adecuado estado de hidratación.
- En la medida de lo posible, incrementar la actividad física.

## 8. MUCOSITIS

- Antes de las comidas, dejar en la boca agua muy fría o hielo picado para adormecer el dolor y poder ingerir mejor.
- Los alimentos tibios o fríos son mejor aceptados que los calientes.
- Tomar líquidos frecuentemente: agua, infusiones, caldo, polos, gelatinas. Evitar las bebidas con gas y las bebidas alcohólicas.
- Evitar los alimentos ácidos (tomate, pimiento, limón, kiwi, fresa, naranja) y los alimentos secos y fibrosos (frutos secos, galletas, carnes a la plancha).
- Escoger alimentos blandos y caldosos: guisos, sopas, salsas, entre otros.
- Añadir salsas o cremas suaves (bechamel, crema de patata, aceite de oliva, caldo) a las carnes y pescados.
- Los alimentos triturados o licuados se ingieren con mayor facilidad.
- Manipulación higiénica de los alimentos
  - Lavarse bien las manos antes de cocinar y comer.
  - Lavar las frutas y verduras antes de pelarlas.

- Guardar los alimentos en la nevera bien tapados.
- Evitar alimentos asociados a toxiinfecciones alimentarias
  - Huevo, carne o pescado crudos.
  - Marisco que sea cocinado al vapor.
  - Lácteos no pasteurizados ni uperizados.
- Mantener una buena higiene oral
  - Lavarse los dientes con un cepillo suave y enjuagarse la boca antes y después de cada comida con infusión de tomillo.

#### 9. XEROSTOMÍA (*sequedad de mucosas, lengua, boca*)

- Tomar líquidos frecuentemente: te, zumos sin azúcar, bebidas carbonatadas.
- Tomar alimentos blandos (arroz, verduras cocidas, pescado blanco, frutas maduras) preparados con un poco de salsa o caldo.
- Evitar los alimentos secos y fibrosos (frutos secos, galletas, carnes a la plancha) y pegajosos (caramelos blandos, pan de molde).
- Evitar alimentos aceitosos y pastosos (fritos, croquetas).
- Triturar y/o licuar los alimentos.
- Tener siempre a mano una botella pequeña de agua para humedecer la boca cuando esté seca.
- Mantener una buena higiene bucal porque la producción de saliva insuficiente facilita la aparición de caries: enjuagarse a menudo la boca con líquido abundante y elixir bucal.
- En el caso de que las glándulas salivales conserven su funcionalidad o no hayan sido retiradas por cirugía, las recomendaciones para estimular la secreción de saliva resultaran útiles:
  - Derretir en la boca cubitos de hielo elaborados con zumo de fruta ácida.
  - Enjuagar la boca 15 minutos antes de las comidas, con una cucharada de zumo de limón fresco diluido en un vaso de agua.
  - Tomar caramelos y chicles sin azúcar.
  - Masticar todas las comidas, incluso los purés.
  - Masticar alimentos ácidos y duros como la piña.

#### 10. DISFAGIA A SÓLIDOS (*dificultad para tragar alimentos sólidos*)

- **Hacer comidas frecuentes y de poco volumen.**
- **Asegurar que las comidas sean completas. Es muy útil** preparar un plato único donde estén representados el primer y el segundo plato. Siempre deberán estar presentes verduras, farináceos y proteínas de alto valor biológico (carne, pescado, lácteos o huevos).
- **Tomar alimentos blandos como purés, cremas, helados, yogur, batidos, natillas, flan, fruta cocida.**
- Añadir caldo, salsas suaves o leche a los alimentos para conseguir una consistencia más blanda y suave y facilitar la deglución.

- Los alimentos deben tomarse fríos o templados. Es mejor dejar enfriar ligeramente los platos calientes (sopas, caldos, purés).
- Variar al máximo en alimentos, colores y sabores en una misma comida de manera que sea más apetitosa.
- En caso de que los requerimientos nutricionales no se cubran con la alimentación tradicional, se pueden utilizar preparados comerciales de alimentación básica adaptada.

#### 11. DISFAGIA A LÍQUIDOS (*dificultad para tragar alimentos líquidos*)

- Todos los líquidos (agua, leche, infusiones, caldo) deben tomarse espesados. Recordar que los medicamentos que deban tomarse con agua, se deben tomar con agua con espesante.
- Asegurar una correcta hidratación (1-1.5 litros de agua), que puede ingerirse espesada o mediante aguas gelificadas.
- Las gelatinas no son aptas para la mayoría de los pacientes con disfagia a líquidos al menos si esta esta en temperatura ambiente puesto que pierde su consistencia y se vuelve líquida.
- Hacer las comidas frecuentes y de poco volumen (5-6 comidas al día).
- Se pueden utilizar productos naturales para espesar la leche (maicena, cereales en polvo), los zumos (maiceina), los caldos (tapioca, pure de patatas), o las cremas (patata, tapioca, Maicena, etc); así como espesantes comerciales.
- Evitar los alimentos de riesgo:

|                                                                   |                                                                                   |
|-------------------------------------------------------------------|-----------------------------------------------------------------------------------|
| <b>Alimentos con varias texturas (líquido y sólido)</b>           | Sopa de pasta, arroz caldoso, leche con copos de cereales, potaje de legumbres... |
| <b>Alimentos duros o secos</b>                                    | Zanahoria cruda, frutos secos, pechuga de pollo, lomo a la plancha                |
| <b>Alimentos sólidos que desprendan líquido al ser masticados</b> | Naranja, sandía, mandarina                                                        |
| <b>Alimentos que se vuelven líquidos a temperatura ambiente</b>   | Polos, helados, gelatinas                                                         |
| <b>Alimentos que se desmenuzan</b>                                | Galletas, patatas de bolsa, pan tostado, polvorones, mantecados...                |
| <b>Alimentos de textura fibrosa</b>                               | Piña, espárragos, apio, lechuga...                                                |
| <b>Frutas o vegetales con piel y/o semillas</b>                   | Kiwi, frambuesas, uvas, granada, manzana sin pelar...                             |
| <b>Alimentos pegajosos</b>                                        | Caramelos blandos, miel, pan de molde...                                          |

- A la hora de comer:
  - Escoger un ambiente tranquilo y agradable para comer.
  - Comer despacio y sin prisa.
  - Evitar distracciones durante las comidas (hablar, ver la tele, utilizar el ordenador o el móvil).
  - Una posición correcta es fundamental: sentado, hombros hacia delante, cabeza ligeramente flexionada hacia delante y los pies apoyados en el suelo.
  - Intentar comer más a primera hora del día porque es posible que por la noche sea mayor la dificultad para comer.
  - Escoger alimentos fríos o calientes, ya que estimulan la deglución.



- Si con la adaptación de la textura de la dieta no se logra cubrir los requerimientos nutricionales, se pasará al siguiente escalón, en el que se encuentra la alimentación de texturas modificadas (dieta trituradas de alto valor nutricional, modificadores de textura y productos de textura modificada). Estos productos pueden alternarse y mezclarse con los platos caseros para enriquecerlos y hacerlos más atractivos.
- Siempre que sea posible, debe ser la propia persona quien introduzca los alimentos en la boca siempre bajo supervisión.
- Recordar que alimentar a una persona es incompatible con las prisas. Situarse a la misma altura de la persona que vaya a comer. Si el cuidador introduce el alimento desde una altura superior, el paciente flexionará la cabeza hacia atrás, dificultando la deglución.
- Utilizar cucharillas de postre para introducir menos volumen de alimento.
- Introducir una nueva cucharada cuando la boca esté vacía de la cucharada anterior.
- Si con la adaptación de la textura de la dieta no se logra cubrir los requerimientos nutricionales, se pasará al siguiente escalón, en el que se encuentra la alimentación de texturas modificadas (dieta trituradas de alto valor nutricional, modificadores de textura y productos de textura modificada). Estos productos pueden alternarse y mezclarse con los platos caseros para enriquecerlos y hacerlos más atractivos.
- A la hora de utilizar un espesante se buscará conseguir la textura adecuada a cada paciente, adicionando la cantidad de espesante en un volumen determinado de líquido siguiendo las instrucciones del fabricante (tabla 2). El espesante ideal será el que mantenga la consistencia adecuada en el tiempo y no altere el sabor de los alimentos y bebidas, y haya demostrado en estudio clínicos su eficacia y seguridad.

| Textura  | Viscosidad  | Aspecto                                                                 |
|----------|-------------|-------------------------------------------------------------------------|
| Líquidos | 1-50 cP     | Líquidos                                                                |
| Néctar   | 50-350 cP   | Puede beberse con pajita y desde una taza                               |
| Miel     | 351-1750 cP | No puede beberse con pajita<br>Se puede tomar de una taza o con cuchara |
| Pudin    | >1750 cP    | Solo se toma con cuchara y mantiene su forma.<br>No puede beberse       |

cP: centipoise.

- El espesante se debe mezclar con el líquido con la ayuda de una coctelera, una batidora o un tenedor y se debe dejar reposar. El líquido al que se le ha añadido el espesante tarda cierto tiempo en alcanzar la textura deseada. No se debe adicionar más polvo mientras está espesando.
- Los líquidos espesan mejor a temperatura ambiente. Los alimentos espesados pueden calentarse, enfriarse o congelarse sin cambiar su textura.
- El agua puede adquirir un gusto diferente al añadir espesante. Se pueden emplear aguas saborizadas o limonadas caseras (agua con limón y endulzada) para mejorar su sabor. También existen en el mercado espesante saborizados que constituyen una muy buena opción para adicionar el agua natural.
- Se pueden espesar todo tipo de líquidos siempre y cuando la patología del paciente lo permita.
- Las bebidas carbonatadas también pueden espesarse.

**ANEXO 5. Cuestionario de Calidad de Vida FACT-G**

A continuación, encontrará una lista de afirmaciones que otras personas con su misma enfermedad consideran importantes. **Escriba un solo número sobre cada línea de puntos para indicar la respuesta que corresponde a los últimos 7 días.**

|     | ESTADO FÍSICO GENERAL DE SALUD                                                                | NADA | N POCO | ALGO | MUCHO | MUCHÍ-SIMO |
|-----|-----------------------------------------------------------------------------------------------|------|--------|------|-------|------------|
| GP1 | Me falta energía.....                                                                         | 0    | 1      | 2    | 3     | 4          |
| GP2 | Tengo náuseas.....                                                                            | 0    | 1      | 2    | 3     | 4          |
| GP3 | Debido a mi estado físico, tengo dificultad para atender a las necesidades de mi familia..... | 0    | 1      | 2    | 3     | 4          |
| GP4 | Tengo dolor.....                                                                              | 0    | 1      | 2    | 3     | 4          |
| GP5 | Me molestan los efectos secundarios del tratamiento.....                                      | 0    | 1      | 2    | 3     | 4          |
| GP6 | Me siento enfermo.....                                                                        | 0    | 1      | 2    | 3     | 4          |
| GP7 | Tengo que pasar tiempo acostado(a).....                                                       | 0    | 1      | 2    | 3     | 4          |

|      | AMBIENTE FAMILIAR Y SOCIAL                                                                   | NADA | UN POCO | ALGO | MUCHO | MUCHÍ-SIMO |
|------|----------------------------------------------------------------------------------------------|------|---------|------|-------|------------|
| GS1  | Me siento cercano(a) a mis amistades.....                                                    | 0    | 1       | 2    | 3     | 4          |
| GS2  | Recibo apoyo emocional por parte de mi familia.....                                          | 0    | 1       | 2    | 3     | 4          |
| GS3  | Recibo apoyo por parte de mis amistades.....                                                 | 0    | 1       | 2    | 3     | 4          |
| GS4  | Mi familia ha aceptado mi enfermedad.....                                                    | 0    | 1       | 2    | 3     | 4          |
| GS5  | Estoy satisfecho(a) con la manera en que se comunica mi familia acerca de mi enfermedad..... | 0    | 1       | 2    | 3     | 4          |
| GS6  | Me siento cercano(a) a mi pareja (o a la persona que es mi principal fuente de apoyo).....   | 0    | 1       | 2    | 3     | 4          |
| GS7* | Estoy satisfecho(a) con mi vida sexual.....                                                  | 0    | 1       | 2    | 3     | 4          |

\* Sin importar su nivel actual de actividad sexual, conteste a la siguiente pregunta. Si prefiere no contestarla, marque esta casilla ☐ y continúe con la siguiente sección

Escriba un solo número sobre cada línea de puntos para indicar la respuesta que corresponde a los últimos 7 días.

|     | ESTADO EMOCIONAL                                                      | NADA | UN POCO | ALGO | MUCHO | MUCHÍ-SIMO |
|-----|-----------------------------------------------------------------------|------|---------|------|-------|------------|
| GE1 | Me siento triste.....                                                 | 0    | 1       | 2    | 3     | 4          |
| GE2 | Estoy satisfecho(a) de cómo me estoy enfrentando a mi enfermedad..... | 0    | 1       | 2    | 3     | 4          |
| GE3 | Estoy perdiendo las esperanzas en la lucha contra mi Enfermedad.....  | 0    | 1       | 2    | 3     | 4          |
| GE4 | Me siento nervioso.....                                               | 0    | 1       | 2    | 3     | 4          |
| GE5 | Me preocupa morir.....                                                | 0    | 1       | 2    | 3     | 4          |
| GE6 | Me preocupa que mi enfermedad empeore.....                            | 0    | 1       | 2    | 3     | 4          |

|     | CAPACIDAD DE FUNCIONAMIENTO PERSONAL                          | NADA | UN POCO | ALGO | MUCHO | MUCHÍSIMO |
|-----|---------------------------------------------------------------|------|---------|------|-------|-----------|
| GF1 | Puedo trabajar (incluya el trabajo en el hogar).....          | 0    | 1       | 2    | 3     | 4         |
| GF2 | Mi trabajo me satisface (incluya el trabajo en el hogar)..... | 0    | 1       | 2    | 3     | 4         |
| GF3 | Puedo disfrutar de la vida.....                               | 0    | 1       | 2    | 3     | 4         |
| GF4 | He aceptado mi enfermedad.....                                | 0    | 1       | 2    | 3     | 4         |
| GF5 | Duermo bien.....                                              | 0    | 1       | 2    | 3     | 4         |
| GF6 | Disfruto con mis pasatiempos de siempre.....                  | 0    | 1       | 2    | 3     | 4         |
| GF7 | Estoy satisfecho(a) con mi calidad de vida actual.....        | 0    | 1       | 2    | 3     | 4         |

#### ANEXO 6. CONSEJOS PARA LA TOMA DE SUPLEMENTOS NUTRICIONALES ORALES.

- Procurar tomarlo en un horario que no haga perder el apetito durante las comidas principales: por la mañana, entre las comidas principales (al menos 60-90 minutos antes), como postre después de estas o antes de acostarse.
- También puede administrarse en pequeñas tomas (50 ml aprox.) a lo largo del día aprovechando la pauta de los medicamentos, especialmente si sacia demasiado.
- Variar los sabores y la manera de tomarlo: frío, caliente (templado, no dejándolo nunca hervir) o a modo de helado (metiéndolo en el congelador).
- Una vez haya sido abierto, conservar en nevera bien cerrado y no consumir si lleva abierto más de 24 horas.

#### ANEXO 7. RECOMENDACIONES GENERALES PARA LA ADMINISTRACION DE NUTRICION ENTERAL POR Sonda

##### Antes de la administración

- El paciente o cuidador debe lavarse las manos cuidadosamente con agua y jabón y limpiar la parte superior de la botella antes de abrirla.
- Comprobar la fecha de caducidad del producto.
- Agitar la fórmula nutricional antes de usarla.
- En el caso de las sondas nasogástricas y las gastrostomías, se debe comprobar el residuo gástrico antes de cada toma. Si el volumen aspirado es superior a 100 ml, se debe reinyectar y esperar una hora antes de administrar la nueva toma.

##### Administración del producto

- Administrar el producto siempre a temperatura ambiente, nunca frío de la nevera.
- La forma de administración dependerá del lugar donde esté colocado el extremo distal de la sonda:
  - Sonda nasogástrica o gastrostomía: en general la administración se realizará de forma intermitente (a gravedad mediante un equipo de infusión o bien en bolo mediante jeringa). En ocasiones por mala tolerancia a este tipo de administración, el médico o nutricionista puede pautar la administración de forma continua mediante bomba de infusión.

- Sondas nasoyeyunales o yeyunostomías: la administración suele ser siempre continua mediante bomba de infusión.
- Durante la administración del producto y entre 30-60 minutos después de la toma se debe mantener al paciente incorporado un mínimo de 30-45º.
- Ante cualquier procedimiento que suponga la colocación del paciente en decúbito, se debe interrumpir la administración de nutrición un mínimo de 15 minutos antes.
- Después de cada toma de nutrición, se debe limpiar la sonda con al menos de 50 ml de agua. En el caso de NE continua, se debe limpiar la sonda con 50-100 ml de agua cada 6 horas.
- Si no se utiliza todo el producto de un envase, lo debe guardar en la nevera un máximo de 24 horas. Posteriormente debe desecharlo. Se aconseja apuntar en el envase el día y la hora de apertura.
- No se deben administrar alimentos por sonda, aunque sean triturados. Los alimentos naturales contienen ácidos que pueden dañar el material de la sonda. En algunas ocasiones, siempre con consulta al especialista, se pueden administrar yogures líquidos o infusiones.
- Respecto a la toma de fármacos:
  - Nunca debe añadirse a la bolsa de nutrición enteral.
  - Si la toma del fármaco coincide en horario con la administración de la nutrición enteral, se comprobará que la toma del fármaco se puede hacer con contenido alimenticio; de no ser así, se administrará en ayunas (1 hora antes o 2 horas después de la nutrición).
  - Si coinciden varios medicamentos en la misma toma, administrarlos de uno en uno, con distintas jeringas y lavando la sonda entre uno y otro. Se comenzará con las formas farmacéuticas líquidas y de mayor viscosidad.
  - En las formas farmacéuticas sólidas introducir el medicamento (previamente triturado si fuera necesario) en el interior de una jeringa sin el émbolo, cerrar. Aspirar un volumen de líquido entre 15-20 ml y agitar para desleír. Es necesario el lavado posterior aspirando unos 10 ml de agua para arrastrar los restos de la jeringa y administrar.
  - Realizar un lavado después de la administración del medicamento por la sonda.

#### **Cuidados de la boca y la sonda**

- Aunque el paciente reciba únicamente nutrición por la sonda, es importante que cuide la limpieza de la boca. Por ello, se debe cepillar los dientes y la lengua con pasta de dientes, un mínimo de 2 veces al día (mañana y noche), intentando no tragar el agua. Se recomienda, si es posible, hacer enjuagues con agua o con una solución antiséptica para refrescar la boca y el aliento. En caso de xerostomía, se puede humedecer la boca varias veces al día con una gasa empapada en agua.
- Las sondas se deben limpiar cada día por fuera con una gasa, agua tibia y jabón suave. Después debe aclararse bien y secarse.

**Cuidados de las gastrostomías y yeyunostomías**

- En el caso de gastro o yeyunostomías, se debe comprobar diariamente que la zona que hay alrededor del orificio o estoma no está enrojecida, inflamada o dolorida. Si se da alguna de estas circunstancias, el paciente debe consultar.
- Durante los primeros 15 días después de la colocación se recomienda limpiar toda la zona con una gasa estéril, agua y jabón, haciendo movimientos en círculo desde la sonda hacia fuera sin apretar. Posteriormente secar toda la zona y aplicar antiséptico (betadine®).
- A partir de la tercera semana, lavar la zona solo con agua tibia y jabón y secarla bien después. Evitar tapar el orificio con un apósito para evitar maceraciones.

**Principales complicaciones asociadas a la nutrición enteral, con medidas de prevención y Pautas a seguir**

| Problema                                                  | Prevención                                                                                                                                                                                                                                                                                   | Acción requerida                                                                                                                                                                                                                                                                                                                                                  |
|-----------------------------------------------------------|----------------------------------------------------------------------------------------------------------------------------------------------------------------------------------------------------------------------------------------------------------------------------------------------|-------------------------------------------------------------------------------------------------------------------------------------------------------------------------------------------------------------------------------------------------------------------------------------------------------------------------------------------------------------------|
| <b>Infecciones alrededor del estoma</b>                   | <ul style="list-style-type: none"> <li>• Lavado de manos con agua y jabón cada vez que se vaya a manipular la sonda y/o realizar las curas del estoma.</li> <li>• Limpiar diariamente el estoma con agua y jabón y secar cuidadosamente.</li> </ul>                                          | <ul style="list-style-type: none"> <li>• Remitir al paciente a su médico o enfermera.</li> </ul>                                                                                                                                                                                                                                                                  |
| <b>Obstrucción de la sonda</b>                            | <ul style="list-style-type: none"> <li>• Pasar siempre un mínimo de 20 ml de agua después de cada toma o administración de fármacos por la sonda.</li> <li>• No administrar alimentos triturados por la sonda.</li> <li>• No administrar los medicamentos junto con la nutrición.</li> </ul> | <ul style="list-style-type: none"> <li>• Pasar agua tibia (unos 50 ml) por la sonda con ayuda de la jeringa. Si no funciona, consulta con su médico o enfermera.</li> </ul>                                                                                                                                                                                       |
| <b>Extracción accidental de la sonda</b>                  | <ul style="list-style-type: none"> <li>• La sonda debe estar siempre sujeta con esparadrapo hipoalergénico.</li> </ul>                                                                                                                                                                       | <ul style="list-style-type: none"> <li>• Se debe intentar volver a colocar la sonda por el estoma y ponerse en contacto con el médico.</li> </ul>                                                                                                                                                                                                                 |
| <b>Perdidas de contenido gástrico a través del estoma</b> |                                                                                                                                                                                                                                                                                              | <ul style="list-style-type: none"> <li>• Remitir al paciente a su médico.</li> </ul>                                                                                                                                                                                                                                                                              |
| <b>Nauseas y vómitos</b>                                  | <ul style="list-style-type: none"> <li>• El paciente debe estar incorporado un mínimo de 30-45º durante la administración de la nutrición y hasta 30-60 minutos después.</li> </ul>                                                                                                          | <ul style="list-style-type: none"> <li>• Colocar al paciente en la posición correcta.</li> <li>• Parar la nutrición 1 o 2 horas.</li> <li>• Posteriormente reiniciar la nutrición a menor velocidad y, si persisten los vómitos, consultar.</li> <li>• Revisar si se cumplen las indicaciones de administración de la nutrición y de los medicamentos.</li> </ul> |
| <b>Diarrea (más de 3 deposiciones líquidas al día)</b>    | <ul style="list-style-type: none"> <li>• Comprobar la fecha de caducidad de la nutrición.</li> <li>• Seguir unas normas higiénicas adecuadas.</li> </ul>                                                                                                                                     | <ul style="list-style-type: none"> <li>• Parar la nutrición 1 o 2 horas.</li> <li>• Posteriormente reiniciar la nutrición a menor velocidad y, si persiste la diarrea, consultar.</li> <li>• Administrar el producto a temperatura ambiente.</li> </ul>                                                                                                           |

## Soporte nutricional y cribado

|                      |                                                                                                                                                                                                 |                                                                                                                                                                                                                  |
|----------------------|-------------------------------------------------------------------------------------------------------------------------------------------------------------------------------------------------|------------------------------------------------------------------------------------------------------------------------------------------------------------------------------------------------------------------|
|                      |                                                                                                                                                                                                 | <ul style="list-style-type: none"> <li>• Si la diarrea ha coincidido con el inicio de un nuevo tratamiento, se debe consultar al médico.</li> <li>• Si se sospecha de una gastroenteritis, consultar.</li> </ul> |
| <b>Estreñimiento</b> | <ul style="list-style-type: none"> <li>• Es recomendable dar pequeños paseos si el paciente puede caminar.</li> <li>• Comprobar que se administra el volumen de agua diario pautado.</li> </ul> | <ul style="list-style-type: none"> <li>• Comunicar el estreñimiento al médico.</li> <li>• Dar masajes abdominales suaves al menos 3 veces al día.</li> <li>• Si se puede, pasear un poco.</li> </ul>             |

## Tratamiento antiemético

### I. POTENCIAL EMETÓGENO DE LOS AGENTES ANTINEOPLÁSICOS

| Mínimo: Nivel 1<br>(<10% de frecuencia de vómitos)                                                                                                                                                                                                                                                                              | Bajo: Nivel 2<br>(10-30% de frecuencia de vómitos)                                                                                                                                                                                                                                                                                                                                                          | Moderado: Nivel 3<br>(30-90% de frecuencia de vómitos)                                                                                                                                                                                                                                                                                                                                                                                               | Alto: nivel 4<br>(>90% de frecuencia de vómitos)                                                                                                                                                                                                                                                                     |
|---------------------------------------------------------------------------------------------------------------------------------------------------------------------------------------------------------------------------------------------------------------------------------------------------------------------------------|-------------------------------------------------------------------------------------------------------------------------------------------------------------------------------------------------------------------------------------------------------------------------------------------------------------------------------------------------------------------------------------------------------------|------------------------------------------------------------------------------------------------------------------------------------------------------------------------------------------------------------------------------------------------------------------------------------------------------------------------------------------------------------------------------------------------------------------------------------------------------|----------------------------------------------------------------------------------------------------------------------------------------------------------------------------------------------------------------------------------------------------------------------------------------------------------------------|
| Alentuzumab<br>Asparraginasas<br>Bevacizumab<br>Bleomicina<br>Bortezomib<br>Cetuximab<br>Citarabina <100mg/m <sup>2</sup><br>Cladribina<br>Dexrazoxano<br>Fludarabina<br>Ipilimumab<br>Metotrexate <50mg/m <sup>2</sup><br>Panitumumab<br>Rituximab<br>Temsirolimus<br>Trastuzumab<br>Vinblastina<br>Vincristina<br>Vinorelbina | Cabazitaxel<br>Citarabina 100-200mg/m <sup>2</sup><br>Docetaxel<br>Doxorubicina liposomal<br>Etopósido<br>Eribulina<br>5-Fluorouracilo<br>Gemcitabina<br>Interferón<br>>5MU<10MU/m <sup>2</sup><br>Ixabepilona<br>Metotrexato 50-250mg/m <sup>2</sup><br>Mitomicina<br>Mitoxantrona<br>Paclitaxel<br>Paclitaxel albúmina<br>Pemetrexed<br>Pentostatina<br>Raltitrexed<br>Topotecán<br>Trastuzumab-emtansina | Azacitidina<br>Bendamustina<br>Carboplatino<br>Carmustina ≤250mg/m <sup>2</sup><br>Cisplatino <50mg/m <sup>2</sup><br>Ciclofosfamida ≤1500mg/m <sup>2</sup><br>Citarabina <2000mg/m <sup>2</sup><br>Dactinomicina<br>Daunorubicina<br>Doxorubicina ≤60mg/m <sup>2</sup><br>Epirubicina ≤90mg/m <sup>2</sup><br>Ifosfamida <10g/m <sup>2</sup><br>Interferona ≥10MU/m <sup>2</sup><br>Irinotecán<br>Metotrexato ≥250mg/m <sup>2</sup><br>Oxaliplatino | AC<br>Carmustina >250mg/m <sup>2</sup><br>Cisplatino ≥50mg/m <sup>2</sup><br>Ciclofosfamida >1500mg/m <sup>2</sup><br>Citarabina ≥2000mg/m <sup>2</sup><br>Dacarbacina<br>Doxorubicina >60mg/m <sup>2</sup><br>Epirubicina >90mg/m <sup>2</sup><br>Ifosfamida ≥10g/m <sup>2</sup><br>Mecloretamina<br>Estreptozocina |

### II. POTENCIAL EMETÓGENO DE ESQUEMAS DE QUIMIOTERAPIA

Se calcula el potencial emetógeno de los esquemas de QT en base al potencial emetógeno de los fármacos que constituyen el esquema:

1. Se parte del citostático de nivel más alto.
2. Los agentes del nivel 1 no contribuyen a la emetogenicidad de la combinación.
3. Los agentes (uno o varios) del nivel 2 incrementan un nivel.
4. Los agentes del nivel 3 y 4 incrementan un nivel por citostático.

#### ALGORITMO DE HESKETH

| Nivel emetógeno de fármacos individuales y nivel emetógeno de la combinación        |
|-------------------------------------------------------------------------------------|
| $2 + 2 = 3$<br>$2 + 2 + 2 = 3$<br>$3 + 2 = 3$<br>$3 + 2 + 2 = 3$<br>$3 + 3 + 3 = 4$ |

| PROTOCOLO                              | POTENCIAL EMETÓGENO                      |
|----------------------------------------|------------------------------------------|
| ABVD                                   | Alto                                     |
| AC                                     | Alto                                     |
| Adria-docetaxel                        | Moderado                                 |
| Al-Sarraf                              | Alto                                     |
| BEP                                    | Alto                                     |
| BOMP                                   | Día 1: Moderado; 2: mínimo; 3: alto      |
| Caelyx                                 | Moderado                                 |
| Carboplatino-etopósido                 | Alto                                     |
| Carboplatino-gemcitabina               | Alto                                     |
| Carbo-trastuzumab-docetaxel            | Moderado                                 |
| Cetuximab-carbo                        | Moderado                                 |
| Cetuximab-irinotecán                   | Moderado                                 |
| CHOP                                   | Moderado                                 |
| R-CHOP                                 | Alto                                     |
| Ciclofosfamida-Myocet                  | Moderado                                 |
| Ciclofosfamida-vincristina-dacarbazina | Alto                                     |
| Cisplatino                             | Alto                                     |
| Cisplatino-gemcitabina                 | Día 1: alto; día 8: bajo                 |
| CMF, R-CMF                             | Moderado                                 |
| CVP, R-CVP                             | Moderado                                 |
| DHAP                                   | Alto                                     |
| Docetaxel                              | Moderado                                 |
| Epirubicina-CDDP-5FU                   | Alto                                     |
| Epirubicina-Ifosfamida                 | Alto                                     |
| ESHAP                                  | Alto                                     |
| Estreptozocin-doxo                     | Alto                                     |
| FEC                                    | Alto                                     |
| FOLFIRI, cetuximab-FOLFIRI             | Moderado                                 |
| FOLFOX, bevacizumab-FOLFOX             | Moderado                                 |
| Gemcitabina                            | Bajo                                     |
| GEMOX                                  | Moderado                                 |
| HIPER-CVAD/MTX-ARAC                    | Ciclo 1-3-5: moderado; ciclo 2-4-6: alto |
| Ifosfamida 3g/m <sup>2</sup>           | Moderado                                 |
| Ifosfamida-VP16                        | Moderado                                 |
| Metotrexato altas dosis                | Moderado                                 |
| MINE                                   | Alto                                     |
| Myocet                                 | Moderado                                 |
| Oxaliplatino-capecitabina              | Moderado                                 |
| Oxaliplatino-tomodex                   | Moderado                                 |
| Pemtrexed                              | Bajo                                     |
| R-FC                                   | Moderado                                 |
| Rituximab-cisplatino-gemcitabina       | Alto                                     |
| Rituximab-bendamustina                 | Moderado                                 |
| Rituximab-GEMOX                        | Moderado                                 |
| Rituximab-ciclofosfamida               | Moderado                                 |
| Stanford                               | Alto                                     |
| TAX                                    | Alto                                     |
| Taxol                                  | Bajo                                     |
| Taxol-bevacizumab                      | Bajo                                     |
| Taxol-carboplatino                     | Alto                                     |
| TCH                                    | Moderado                                 |
| Topotecán                              | Moderado                                 |



|                                  |          |
|----------------------------------|----------|
| Trastuzumab                      | Mínimo   |
| Trastuzumab-docetaxel/paclitaxel | Bajo     |
| Trastuzumab-vinorelbina          | Mínimo   |
| VAC                              | Alto     |
| VAD                              | Moderado |
| Vinorelbina                      | Bajo     |

### III. PROFILAXIS ANTIEMÉTICA

#### III.a. Esquemas altamente emetógenos (Nivel 4):

| DÍA 1.<br>EMESIS AGUDA                                                                                                                                                                                                                      | DÍAS SIGUIENTES.<br>EMESIS RETARDADA                                                      |
|---------------------------------------------------------------------------------------------------------------------------------------------------------------------------------------------------------------------------------------------|-------------------------------------------------------------------------------------------|
| Comenzar el tto antiemético combinado antes de la quimioterapia                                                                                                                                                                             |                                                                                           |
| <b>A</b>                                                                                                                                                                                                                                    |                                                                                           |
| - Granisetron 1mg IV + dexametasona 20mg IV.<br>Se pueden usar lorazepam y antiH2 o IBP como adyuvantes.                                                                                                                                    | -Dexametasona oral días 2-4, 8mg/mañana (4mg noche opcional) +/- metoclopramida 10mg/6-8h |
| <b>B. Alternativa</b>                                                                                                                                                                                                                       |                                                                                           |
| - Granisetron 1mg IV + Dexametasona 12mg IV + Fosaprepitant 150mg IV ( <i>de elección en todos los pacientes con náuseas/vómitos &gt;G2 en el 1º ciclo o ciclo posterior</i> ).<br>Se pueden usar lorazepam y antiH2 o IBP como adyuvantes. | -Dexametasona 8mg/día oral día 2.<br>-Dexametasona 8mg/12 horas oral día 3-4.             |

#### III.b. Esquemas moderadamente emetógenos (Nivel 3):

| DÍA 1.<br>EMESIS AGUDA                                                                                  | DÍAS SIGUIENTES.<br>EMESIS RETARDADA                             |
|---------------------------------------------------------------------------------------------------------|------------------------------------------------------------------|
| Comenzar el tto antiemético combinado antes de la quimioterapia                                         |                                                                  |
| - Granisetron 1mg IV + dexametasona 12mg IV<br>Se pueden usar lorazepam y antiH2 o IBP como adyuvantes. | Dexametasona 8mg oral días 2-3 +/- metoclopramida 10mg/6-8h oral |

#### III.c. Esquemas poco emetógenos (Nivel 2):

| DÍA 1.<br>EMESIS AGUDA                                          | DÍAS SIGUIENTES.<br>EMESIS RETARDADA  |
|-----------------------------------------------------------------|---------------------------------------|
| Comenzar el tto antiemético combinado antes de la quimioterapia |                                       |
| - Dexametasona 4-8mg IV o metoclopramida 30mg IV                | - No se necesita profilaxis de rutina |

#### III.d. Esquemas muy poco emetógenos (Nivel 1):

| DÍA 1.<br>EMESIS AGUDA                                                                                                                                               | DÍAS SIGUIENTES.<br>EMESIS RETARDADA  |
|----------------------------------------------------------------------------------------------------------------------------------------------------------------------|---------------------------------------|
| - No necesita profilaxis de rutina.<br>- Si se produjeran náuseas/vómitos (0-24h) considerar el uso de los antieméticos mencionados para los agentes de bajo riesgo. | - No se necesita profilaxis de rutina |

#### **IV. TRATAMIENTO DE LAS NÁUSEAS/VÓMITOS ANTICIPATORIOS**

Tratamiento adecuado desde el primer ciclo de QT.

Apoyo psicológico.

Lorazepam 0.5-2mg vo la noche previa y la mañana de la QT.

#### **V. TRATAMIENTO DE LA EMESIS REFRACTARIA**

- Subir un nivel:

Añadir granisetron en esquemas poco emetógenos.

Añadir fosaprepitant en esquemas moderadamente emetógenos.

Añadir palonosetrón 0.5mg/ netupitant 300mg en esquemas moderada o altamente emetógenos. Una hora antes de la QT. Reducir dosis de dexametasona oral un 50%.

- Proteger la fase tardía (si es el problema y no se había hecho).

- Añadir uno o más agentes antieméticos adicionales de otra fase:

Olanzapina 10mg/día (3días) ó 5mg/d (6días).

Dexametasona 8mg/día vo.

Lorazepam 0.5-2mg/12h o 24h vo.

Haloperidol 1-2mg/4-6h.

Dimenhidrinato 100mg/12h vo, alternando con proclorperacina 10mg/12h vo.

#### **VI. MANEJO DE LA EMESIS CON QT EN MÚLTIPLES DÍAS**

Considerar los días de QT como fase aguda y posteriormente como diferida.

#### **VII. FOSAPREPITANT: INTERACCIONES FARMACOLÓGICAS**

Fosaprepitant es simultáneamente sustrato, moderado inductor y moderado inhibidor CYP3A4; también induce el CYP2C9. Las interacciones con determinados fármacos son más significativas con fármacos administrados vía oral, por su metabolismo de primer paso.

Como sustrato CYP3A4:

- Precaución con inhibidores potentes (ketoconazol, ritonavir, claritromicina) que pueden aumentar su AUC.
- Evitar con inductores potentes (fenobarbital, fenitoína, carbamacepina, hiera de San Juan) que pueden disminuir su AUC.

- Como inhibidor moderado de CYP3A4:

- Pimozida (Orap<sup>®</sup>) y terfenadina (Ternadin<sup>®</sup>) están contraindicados.
- Precaución con antineoplásicos orales (etopósido y vinorelbina) porque pueden aumentar su AUC.
- Dexametasona y metilprednisolona disminuir su dosis al 50%. No debe reducirse si se está administrando como parte de la quimioterapia.
- Precaución con fármacos metabolizados con CYP3A4 y rango terapéutico estrecho (ciclosporina, tacrolimus, everolimus, fentanilo).

- Como inductor moderado de CYP3A4:
  - Aumentar la frecuencia de monitorización del paciente con warfarina (reducciones significativas del INR).
  - Disminuye la eficacia de anticonceptivos hormonales durante el tratamiento con aprepitán y en los dos meses siguientes de la última dosis, deben usarse métodos anticonceptivos alternativos o de refuerzo.
- No es necesario ajustar la dosis en pacientes con insuficiencia renal.

## Anemia inducida por quimioterapia

El presente protocolo es de aplicación para el manejo de la anemia en pacientes en curso de quimioterapia.

Como principios generales hay que tener en cuenta:

- *Los pacientes en tratamiento con intención paliativa pueden transfundirse por debajo de 9 g/dL de Hb.*
- *No hay indicación de soporte con EPO en pacientes que no están recibiendo quimioterapia por los datos de progresión de enfermedad y disminución de la supervivencia.*

### I. INDICACIONES SOPORTE CON ERITROPOYETINA

Cuando **NO** se requiera corrección inmediata:

1. **Quimioterapia con intención curativa.- NO INDICACIÓN**
2. **Quimioterapia con intención no curativa.-** Evaluar sintomatología del paciente y el beneficio/riesgo EPO vs transfusión y preferencias paciente.

**2.1. Pacientes asintomáticos.-** Evaluar factores de riesgo (Ver apéndice). El objetivo es conseguir Hb entre 10-12 g/dL

- No factores → Reevaluación periódica
- Si → Medir niveles de hierro sérico, ferritina, saturación de transferrina:
  - Ferritina <30 ng/ml y saturación transferrina <15% → hierro oral ó intravenoso (Ver apéndice)
  - Ferritina ≤800 ng/ml y saturación transferrina < 20% → valorar hierro iv + EPO
  - Ferritina >800 o transferrina >20% → no precisa tratamiento con hierro. Valorar tratamiento con EPO (Ver apéndice)

**2.2. Pacientes sintomáticos.-** Transfusión y evaluar utilización de eritropoyetina según factores de riesgo para politransfusión, pronóstico y duración estimada del tratamiento quimioterápico.

### APÉNDICE

**Factores de riesgo:**

- Transfusiones en los últimos 6 meses.
- Radioterapia >20% superficie corporal.
- Tratamiento quimioterápico muy mielosupresor.
- Nivel de hemoglobina.
- Terapia mielosupresora previa.

### Administración de hierro

Administración de **HIERRO CARBOXIMALTOSA** siempre que sea posible en dosis única.

En caso que no estuviera incluido en cartera de servicio del centro en ese momento Fe III Hidróxido –Sacarosa (VENOFER®).

- Cálculo necesidades según fórmula y tabla recogida en ficha técnica
- Dosis únicas de 100 mg (en 100 SF en 30 min) o 200 mg (en 200 SF en 60 min) como máximo 3 ó 2 veces por semana, respectivamente.
- Primera infusión (de 100 mg): primeros 25 ml se pasan en 15 min, resto en 45 min.
- Segunda administración: cada ampolla de 100 mg en 30 min.
- Tercera administración y sucesivas: cada ampolla de 100 mg en 15 minutos

Efectos secundarios: hipersensibilidad y anafilaxia, sabor metálico, cefalea, mareo, HTA, prurito, fiebre, dolores musculares, náuseas.

### Administración de eritropoyetina

#### Dosis recomendada:

*Epoetina beta*: 450 UI/kg semanales. Habitualmente 30.000 UI semanales.

#### Ajuste de la dosis:

Aumento de dosis a 60.000 U a la semana si el aumento de Hb es < 1 g/dl después de 4 semanas de tratamiento.

Reducción de dosis un 25% cuando la Hb se aproxima a 12 g/dl o la Hb aumenta > 1 g/dl en 2 semanas.

Suspender tratamiento si Hb>12 g/dl hasta que vuelva a <11 g/dl y reiniciar con un 25% menos de dosis previa.

#### Ausencia de respuesta:

La continuación del tratamiento más allá de 6 – 8 semanas en pacientes sin respuesta adecuada (aumento de hemoglobina mayor 1 – 2 g/dl después de 4 semanas) debe evitarse.

En caso de pautarse Fe oral: FERO-GRADUMET (Fe<sup>++</sup>, 1 comp= 106 mg Fe elemento), 1- 2 comprimidos en ayunas.

## Preservación de la fertilidad en pacientes que van a recibir QT

### I. INDICACIÓN:

Pacientes premenopáusicas y varones que mantienen deseo genésico.

### II. TRATAMIENTO:

#### **II.a. En mujeres premenopáusicas**

Análogos LH-RH (goserelina) 3,6 mg sc/4 semanas (iniciar al menos 1 semana antes de la 1ª dosis de QT y la última dosis será administrada en las dos semanas posteriores a la última dosis de QT).

#### CRIOPRESERVACIÓN OVOCITOS:

- Indicaciones:
  - Tras evaluar con la paciente los riesgos potenciales de retrasar el inicio de la quimioterapia, según la naturaleza de la neoplasia de base y el riesgo de infertilidad del esquema de quimioterapia indicado).
  - Premenopáusicas 18-40 años.
  - Sin hijos, mantienen deseo genésico, y van a ser sometidas a tto gametotóxicos o procesos con riesgo de fallo ovárico prematuro.
- Antes de iniciar QT: derivarlas a Unidad de Reproducción asistida (HMI).

#### **II.b. En varones**

#### CRIOPRESERVACIÓN DE SEMEN:

- Indicaciones:
  - Por motivo de su enfermedad y/o tratamiento quimioterápico y/o radioterápico, tienen posibilidad de esterilidad.
- Hay que rellenar el formulario BTS-F-01A (preguntar al supervisor de enfermería de planta (Pablo)).
  - Derivar al paciente con dicho formulario e informe oncológico al Hospital Civil, Banco sectorial de tejidos.
  - Telf 951 034 113, 951 034 100, 951 034 108.
  - Contactar con Dra M Carmen Hernández Lamas o Dra Laura Ponce Verdugo.

## Tratamiento del dolor

|                                                                 |                                                                                               |                                                                                          |                                                                               |
|-----------------------------------------------------------------|-----------------------------------------------------------------------------------------------|------------------------------------------------------------------------------------------|-------------------------------------------------------------------------------|
| <b>Primer Escalón:</b><br>Dolor leve<br>AINES/-<br>Coadyuvantes | <b>Segundo Escalón:</b><br>Dolor Moderado<br>Opioides<br>menores/-<br>AINES/-<br>Coadyuvantes | <b>Tercer Escalón:</b><br>Dolor Intenso<br>Opioides mayores/-<br>AINES/-<br>Coadyuvantes | <b>Cuarto Escalón:</b><br>Dolor Severo<br>Técnicas Invasivas.<br>Vía espinal. |
|-----------------------------------------------------------------|-----------------------------------------------------------------------------------------------|------------------------------------------------------------------------------------------|-------------------------------------------------------------------------------|

| TABLA DE EQUIVALENCIA DE MÓRFICOS |                              |                              |                                   |                                  |
|-----------------------------------|------------------------------|------------------------------|-----------------------------------|----------------------------------|
| Morfina oral<br>(Dosis mg/día)    | Morfina sc<br>(Dosis mg/día) | Morfina iv<br>(Dosis mg/día) | Fentanilo TTS<br>(Dosis mcg/hora) | Oxycodona oral<br>(Dosis mg/día) |
| 10 - 30                           | 15                           | 10                           | 12                                | 10 – 15                          |
| 60                                | 30                           | 20                           | 25                                | 20 – 40                          |
| 90                                | 45                           | 30                           | 37                                | 45                               |
| 120                               | 60                           | 40                           | 50                                | 60                               |
| 180                               | 90                           | 60                           | 75                                | 80 – 100                         |
| 240                               | 120                          | 80                           | 100                               | 120 – 135                        |
| 360                               | 180                          | 120                          | 150                               | 180                              |

| CARACTERÍSTICAS PRINCIPALES DE LOS OPIOIDES |                                     |                 |             |                                               |                                                                         |
|---------------------------------------------|-------------------------------------|-----------------|-------------|-----------------------------------------------|-------------------------------------------------------------------------|
| Fármaco                                     | Dolor                               | Dosis iniciales | Dosis techo | Efecto 2º importante                          | Comentario                                                              |
| Codeína                                     | Leve-moderado                       | 15-30mg/4-6h    | 120mg       | Estreñimiento                                 | Poca utilización                                                        |
| Tramadol                                    | Moderado-severo agudo y neuropático | 25-50mg/8h      | 400mg/día   | Náuseas, vómitos, somnolencia                 | Retrasa la utilización de fármacos opiodes potentes                     |
| Morfina                                     | Severo-intenso                      | 10-30 mg/día    | No tiene    | Estreñimiento, retención urinaria, sudoración | Utilizar en pacientes muy avanzados sin necesidad de cambiar el fármaco |
| Fentanilo transdérmico                      | Moderado-severo                     | 12.5-25/72h     | No tiene    | Náuseas, estreñimiento                        | Ejerce buen control                                                     |
| Oxycodona                                   | Moderado-severo                     | 5-10mg/12h      | No tiene    | Estreñimiento, náuseas                        | Efecto sobre dolor neuropático.                                         |

| FÁRMACOS COADYUVANTES                      |                                                                                                               |
|--------------------------------------------|---------------------------------------------------------------------------------------------------------------|
| <b>Antidepresivos</b>                      | Amitriptilina 10-75mg/d<br>Clorimipramina 20-75mg/d<br>Venlafaxina 75mg/d                                     |
| <b>Neurolépticos</b>                       | Haloperidol 0.5-5mg/d<br>Levopromacina 10-100 mg/d<br>Clorpromacina 10-50 mg/d                                |
| <b>Ansiolíticos</b>                        | Diacepam 5-20mg/d<br>Midazolam 20-80mg/d<br>Bromacepam 0.5-4 mg/d<br>Alprazolam 0.25-4mg/d<br>Zolpidem 10mg/d |
| <b>Anticonvulsivantes o neuromodulares</b> | Pregabalina 300 – 600 mg/d<br>Gabapentina 900-1800mg/d<br>Carbamazepina 200-1600mg/d<br>Clonacepam 0.5-4mg/d  |
| <b>Corticoides</b>                         | Metilprednisona 125mg/d<br>Dexametasona 2-12mg/d                                                              |
| <b>Otros</b>                               | Protectores gástricos, laxantes, bifosfonatos.                                                                |

| PAUTAS FARMACOLÓGICAS ESPECÍFICAS SEGÚN TIPO DE DOLOR ONCOLÓGICO                                                                                    |                                                                                                                              |
|-----------------------------------------------------------------------------------------------------------------------------------------------------|------------------------------------------------------------------------------------------------------------------------------|
| Dolor por compresión nerviosa:<br><b>Síndromes de dolor neuropático:</b><br><b>Plexopatías.</b><br><b>Polineuropatías.</b><br><b>Radiculopatías</b> | Amitriptilina 10-75mg/d<br>Pregabalina 150-360mg/d<br>Gabapentina 900-1800 mg/d<br>Clonacepam 0.5mg/8h<br>Dexametasona 4mg/d |
| Dolor por metástasis óseas                                                                                                                          | Metilprednisona 125mg/d<br>Dexametasona 4-8mg/d<br>Zolpidem 10mg/d<br>Zoledronato 4mg iv/28días/6meses                       |
| Dolor por hipertensión intracraneal                                                                                                                 | Dexametasona 8-12 mg sc/d<br>Furosemida 10-20mg/d<br>Clorazepato dipotásico 10mg/d                                           |

| DOLOR IRRUPTIVO |                                                                                                                      |                         |                             |                   |
|-----------------|----------------------------------------------------------------------------------------------------------------------|-------------------------|-----------------------------|-------------------|
| Nombre          | Nombres comerciales                                                                                                  | Inicio del efecto (min) | Duración del efecto (horas) | Biodisponibilidad |
| Morfina         | Sevredol<br>Oralmorph                                                                                                | 30 - 40                 | 3 – 6                       | ≈ 50%             |
| Fentanilo       | Actiq (transmucoso oral)<br>Effentora (oral)<br>Avaric (sbl)<br>Abstral (sbl)<br>PecFent (nasal)<br>Instanyl (nasal) | 10 – 15                 | 1 – 3.5                     | < 25% (actiq 50%) |
| Oxycodona       | OxyNorm                                                                                                              | 30                      | 4 – 6                       | 73%               |
| Hidromorfona    |                                                                                                                      | 30                      | 4 – 5                       | 50%               |
| Metadona        |                                                                                                                      | 10 – 15                 | 4 – 6                       | 80%               |



## Directrices para el uso de factores estimulantes de colonias granulocíticas

### **I. INDICACIÓN DE PROFILAXIS PRIMARIA (después de cada ciclo de quimioterapia)**

Riesgo de neutropenia febril > 20%. (Para ejemplos ver apéndice 1)

Riesgo 10-20% (No de entrada, valorar en función de intención de tratamiento, necesidad de evitar retrasos y factores de riesgo; apéndice (2))

**II. INDICACIÓN DE PROFILAXIS SECUNDARIA** (tras un episodio de fiebre neutropénica en ciclos anteriores o de retrasos en el tratamiento por neutropenia sin fiebre)

Recomendado en aquellos pacientes en los que una reducción de dosis pueda comprometer el resultado del tratamiento, supervivencia libre de progresión o supervivencia global. En otras situaciones clínicas, una reducción de dosis o retraso puede ser una alternativa razonable y es la alternativa de elección cuando el paciente ha sufrido otras toxicidades  $\geq$  grado 2 (además de la neutropenia).

### **III. INDICACIÓN EN CASO DE NEUTROPENIA AFEBRIL**

No es recomendable el uso de G-CSF de forma rutinaria.

### **IV. INDICACIÓN EN CASO DE NEUTROPENIA FEBRIL (Ver apartado Manejo Neutropenia febril)**

### **V. QUIMIOTERAPIA CONCOMITANTE CON RADIOTERAPIA**

Se debe evitar su uso (sobretudo en cáncer de cabeza y cuello e irradiación de mediastino)

### **VI. DOSIS RECOMENDADAS:**

#### **Filgrastim:**

Inicio: 24-72 horas después de la quimioterapia

Dosis recomendada: 5  $\mu\text{g}/\text{kg}/\text{día}$  SC (normalmente 5 días)

< 70 kg  $\rightarrow$  300  $\mu\text{g}$

>70 kg  $\rightarrow$  480  $\mu\text{g}$

En pacientes que reciben R-CHOP/14, filgrastim se administrará los días 4, 6, 8 y 10 de cada ciclo (a la dosis habitual).

#### **Pegfilgrastim:**

Inicio: 24 horas después de finalizada la quimioterapia

Dosis recomendada: 6 mg SC dosis única por ciclo de quimioterapia.

**APÉNDICE 1:**

| <b>TIPO DE TUMOR Y CATEGORÍA DE RIESGO DE NF <math>\geq 20</math> %:</b> | <b>RÉGIMEN DE QUIMIOTERAPIA</b>                                                          | (2) |
|--------------------------------------------------------------------------|------------------------------------------------------------------------------------------|-----|
| Cáncer de mama                                                           | Docetaxel ( Esquema AC-Docetaxel)<br>TAC                                                 |     |
| Endometrio                                                               | Cisplatino/ Adriamicina / Taxol                                                          |     |
| LNH                                                                      | DHAP<br>ESHAP                                                                            |     |
| Germinales Testículo                                                     | TIP<br>BEP<br>BEIP                                                                       |     |
| Sarcoma                                                                  | Ifosfamida altas dosis<br>Ifosfamida-Etopósido / VAC<br>Cisplatino-Ifosfamida- Etopósido |     |

Factores de riesgo neutropenia febril:

- > 65 años.
- Neutropenia preexistente debido a enfermedad extensa, quimioterapia o irradiación previa.
- Antecedentes de neutropenia febril con quimioterapia anterior.
- Heridas abiertas, infecciones tisulares activas o enfermedad avanzada.

## Extravasación

### I. DIAGNÓSTICO

- Debe ser lo más precoz posible.
- Podemos sospecharla en las siguientes circunstancias: desaparece el retorno venoso de sangre, disminuye el flujo de perfusión, hinchazón o eritema en torno al punto de la punción venosa o cuando el paciente refiere dolor, escozor o sensación de quemazón.
- Comprobación: en el caso de que no salga sangre con la aspiración con una jeringa a través de la cánula o en el caso de que no disminuya la velocidad de goteo cuando se realiza un torniquete próximo.

### II. CLASIFICACIÓN de los fármacos citostáticos según su agresividad tisular

- Vesicantes: busulfán, carmustina, ciclofosfamida, cisplatino ( $>0.4$  mg/ml), dactinomicina, daunorubicina, dexrazoxano, docetaxel, doxorubicina/doxorubicina liposomal, epirubicina, estreptozocina, ibritumumab, tiotetan, idarubicina, mitomicina, mitoxantrona, oxaliplatino, paclitaxel/paclitaxel-nab, trabectedina, trióxido de arsénico, alcaloides de vinca.
- Irritantes: cabazitaxel, carmustina, bendamustina, bortezomib, carboplatino, cisplatino ( $<0.4$  mg/ml), dacarbazina, etopósido, fluorouracilo sin diluir, ifosfamida, irinotecán, mesna (no diluido), melfalán, temsirolimus.

### III. TRATAMIENTO

- Parar la infusión de la quimioterapia. La dosis restante se administrará por otra vía y, preferiblemente, en otra extremidad.
- Aspirar a través de la vía 5-10 ml de sangre con la finalidad de extraer la máxima cantidad de fármaco extravasado.
- Antes de retirar la vía, si procede, inyecte el antídoto correspondiente.
- Retirar la vía (catéter).
- Únicamente en el caso de formación de una ampolla con fármaco extravasado se extraerá su contenido, puncionando dicha ampolla con jeringa y aguja subcutánea (tipo insulina) (la aspiración de tejido subcutáneo es doloroso e inefectivo).
- Colocar la extremidad elevada durante 48 horas (nivel superior al corazón).
- Si es preciso, marcar los bordes con tinta indeleble y señalar la zona afectada en el “mapa de venas”.
- No aplicar ningún tipo de presión en la zona. Evitar vendajes.
- En el área de la extravasación (si no hay necrosis) realizar medidas higiénicas habituales con suavidad.

## Extravasación

| Droga                                                                                                                                                                                                                                                                                  | Tratamiento                   | Vía de administración                                                          | Frecuencia                                                                                                                                                                                                                              | Duración   |
|----------------------------------------------------------------------------------------------------------------------------------------------------------------------------------------------------------------------------------------------------------------------------------------|-------------------------------|--------------------------------------------------------------------------------|-----------------------------------------------------------------------------------------------------------------------------------------------------------------------------------------------------------------------------------------|------------|
| <b>Etopósido</b><br><b>Alcaloides de vinca</b><br>(vinblastina, vincristina, vinorelbina) (1)                                                                                                                                                                                          | Calor seco moderado           | Tópico                                                                         | 1ª hora todo lo que tolere el paciente, luego 30 min cada 6h.                                                                                                                                                                           | 2 días     |
|                                                                                                                                                                                                                                                                                        | Hialuronidasa                 | Subcutáneo                                                                     | 6 punciones de 150 UI alrededor de la zona afectada.                                                                                                                                                                                    |            |
| <b>Antraciclinas</b><br>(daunorubicina, doxorubicina, epirubicina, idarubicina)<br><br><b>Antraciclinas liposomal</b><br>(daunorubicina, doxorubicina)                                                                                                                                 | Frío                          | Tópico                                                                         | 30-60 minutos y luego 30 min cada 6 horas.<br>Parando ≥ 15 minutos antes de la administración de dexrazoxano.                                                                                                                           | Primer día |
|                                                                                                                                                                                                                                                                                        | Dexrazoxano (2)               | Perfusión IV en 1-2 horas en una vena grande (lejos del área de extravasación) | 1000mg/m2 en las primeras 6 horas.<br>1000mg/m2 tras 24 horas.<br>500mg/m2 tras 48 horas                                                                                                                                                |            |
|                                                                                                                                                                                                                                                                                        | DMSO                          | Tópico                                                                         | Para extravasaciones de venas periféricas, si dexrazoxano no está disponible o no puede usarse en las primeras 6 horas.<br>DMSO solución al 99%, 2 ml cada 6 horas en el doble del área afectada. Dejar secar al aire libre, no cubrir. | 7-14 días. |
| <b>Cisplatino (&gt;0.4mg/ml o volumen extravasado &gt; 20ml).</b><br><b>Carboplatino (&gt;5mg/ml)</b><br><b>Fluoracilo (&gt;20ml o concentración elevada (infusores) o reacción inflamatoria local)</b><br><b>Ifosfamida (&gt;50mg/ml)</b><br><b>Mitomicina</b><br><b>Mitoxantrona</b> | Frío                          | Tópico                                                                         | 1ª hora todo lo que tolere el paciente, luego 30 min cada 6h.<br>Fotoprotección del área afectada en caso de fluoracilo.                                                                                                                | 24 horas   |
|                                                                                                                                                                                                                                                                                        | DMSO                          | Tópico                                                                         | DMSO solución al 99%, 2ml cada 6h en el doble del área afectada. Dejar secar al aire libre, no cubrir.                                                                                                                                  | 7-14 días  |
| <b>Mecloretamina</b><br><b>Bendamustina</b><br><b>Carboplatino (&lt;5mg/ml)</b><br><b>Cisplatino (&lt;0.4mg/ml)</b><br><b>Dacarbacina</b><br><b>Carmustina</b>                                                                                                                         | Frío                          | Tópico                                                                         | 1ª hora todo lo que tolere el paciente, luego 30 min cada 6h.<br>De 6 a 12 horas tras la inyección del antídoto tiosulfato de sodio.                                                                                                    | 3 días     |
|                                                                                                                                                                                                                                                                                        | Tiosulfato de sodio 1/6 molar | Subcutáneo                                                                     | Punciones de 0.5 ml alrededor de la zona afectada, máximo 5 ml (6 punciones).                                                                                                                                                           |            |
| <b>Oxaliplatino (3)</b>                                                                                                                                                                                                                                                                | Corticoides                   | Oral                                                                           | Dexametasona 8mg/12h.                                                                                                                                                                                                                   | 14 días    |
|                                                                                                                                                                                                                                                                                        | Calor                         | Tópico                                                                         | 1ª hora todo lo que tolere el paciente, luego 30 min cada 6h.                                                                                                                                                                           | 2 días     |
| <b>Taxanos (docetaxel, paclitaxel)</b>                                                                                                                                                                                                                                                 | Calor                         | Tópico                                                                         | Al menos 15-20 minutos/4 veces al día.                                                                                                                                                                                                  | 24 horas   |
|                                                                                                                                                                                                                                                                                        | Hialuronidasa                 | Subcutáneo                                                                     | 6 punciones de 150 UI alrededor de la zona afectada.                                                                                                                                                                                    |            |
| <b>Otros agentes</b>                                                                                                                                                                                                                                                                   | Frío                          | Tópico                                                                         | Al menos 15-20 minutos/4 veces al día.                                                                                                                                                                                                  | 24 horas   |

(1) Los corticoides tópicos pueden empeorar el daño local de la extravasación de alcaloides de vinca y etopósido.

Luego están contraindicados en estos casos.

(2) Dexrazoxano en el caso de doxorubicina, daunorubicina, epirubicina, idarubicina SI extravasación confirmada >5ml, sospecha de extravasación de cantidad >10 ml, o bien, extravasación a través de vía central. Contraindicado DMSO simultáneamente.

(3) La exposición al frío puede agravar el daño neuropático agudo con oxaliplatino.

## Síndrome de lisis tumoral

### **I. DIAGNÓSTICO**

Sintomatología inespecífica: Náuseas, vómitos, disminución del nivel de conciencia, arritmia y oligoanuria.

Diagnóstico se confirma con análisis de bioquímica sérica: hiperuricemia, hipocalcemia, hiperpotasemia e hiperfosfatemia. Y si no se instaura tratamiento, fracaso renal.

### **II. PROFILAXIS**

#### **II.a. Profilaxis 24-48 horas antes de iniciar QT en:**

- En todos los linfomas de muy alta agresividad (Burkitt y linfoblástico).
- Linfomas con alta carga tumoral.
- Linfomas con masa bulky.
- Tumores sólidos con alta carga tumoral muy quimiosensibles.
- Patología renal previa.

#### **II.b. Profilaxis con:**

- Hidratación enérgica: 3000 ml/m<sup>2</sup> de suero glucosalino.
- Alcalinización de la orina: Bicarbonato 1/6M: 250ml cada 6-8 h.
- Alopurinol 300 mg/24h vo.
- Valorar Rasburicasa (en vez de Alopurinol) 0,20 mg/kg/d en casos de:
  - Insuficiencia renal, hiperuricemia severa, gran riesgo de síndrome de lisis tumoral o ECOG avanzado en pacientes recuperables.
  - En caso de usar rasburicasa: suspenderla tras la segunda dosis si la creatinina y el ácido úrico se encuentra en rango normal.

#### **II.c. Pruebas complementarias:**

- Monitorizar función renal, potasio, ácido úrico, calcio y fósforo.
- ECG en hiperpotasemia e hipocalcemia.

### **III. TRATAMIENTO**

- Intensificar medidas anteriores e instaurar rasburicasa si no lo estaba previamente.
- Si insuficiencia renal aguda:
  - Valorar UCI. Furosemida iv (1-2 mg/kg/dosis) o Manitol 20% iv 0'5-1g/Kg/dosis en 15 minutos (contraindicado en caso de oliguria).
  - Puede requerirse Dopamina a 2'5 microg/Kg/minuto.
  - Descartar uropatía obstructiva, en caso de no respuesta.

- Hemodiálisis si:
  - Potasio >7mEq/l con hipocalcemia e hiponatremia sintomáticas.
  - Ácido úrico >10 mg con hipertensión grave que no responde al tto.
  - Creatinina >10 mg con sobrecarga de volumen sintomática.
  - Fosforo > 10 mg.
- Corrección de hiperpotasemia:
  - Si potasio <7 mEq/L y asintomático: retirar aportes y tto de acidosis.
  - Si potasio > 7 mEq/L con signos clínicos o alt ECG: lo anterior más medidas quelantes de potasio.
- Corrección de hiperfosfatemia.
- Corrección de hipocalcemia: si existe hiperfosfatemia corregir ésta sin corregir hipocalcemia.

## Evaluación geriátrica/cribado de fragilidad

A todos los pacientes mayores de 70 años que vayan a recibir tratamiento sistémico contra el cáncer se le realizara el cuestionario G8. Si la puntuación obtenida es menor a 14, el paciente debe ser sometido a una evaluación geriátrica integral antes de prescribir el tratamiento. Hasta que la evaluación geriátrica integral esté protocolizada con los Servicios de Medicina Interna/Geriatria, los pacientes no deben recibir tratamiento hasta ser discutidos en sesión clínica.

### **G8: cuestionario para el cribado de fragilidad y evaluación geriátrica**

#### ***A. ¿Ha disminuido la ingesta dietética en los últimos 3 meses debido a pérdida de apetito, problemas digestivos, de masticación o de deglución?***

- 0 Disminución severa de la ingesta.
- 1 Disminución moderada de la ingesta.
- 2 No ha disminuido la ingesta.

#### ***B. ¿Ha perdido peso durante los últimos 3 meses?***

- 0 Ha perdido más de 3 kg.
- 1 Ha perdido entre 1 y 3 kg.
- 2 No ha perdido peso.

#### ***C. Movilidad.***

- 0 Vida cama/sillón.
- 1 Se moviliza en su domicilio pero no sale a la calle.
- 2 Sale a la calle sin ayuda.

#### ***E. Problemas neuropsicológicos.***

- 0 Demencia o depresión severas.
- 1 Demencia leve/moderada.
- 2 Sin problemas neuropsiquiátricos.

#### ***F. Índice de masa corporal.***

- 0 IMC < 19.
- 1 IMC 19-<21.
- 2 IMC 21-<23.
- 3 IMC ≥ 23.

#### ***H. ¿Toma más de 3 fármacos al día de forma continuada?***

- 0 Sí.
- 1 No.

#### ***P. ¿Cómo considera el paciente su estado de salud en relación a otras personas de su misma edad?***

- 0 No tan bueno.
- 0,5 No lo sabe.
- 1 Tan bueno como el de otras personas de su edad.
- 2 Mejor que el de otras personas de su edad.

#### ***X. Edad***

- 0 > 85 años.
- 1 80-85 años.
- 2 < 80 años.

#### **Puntuación total: 0-17.**

## Bibliografía

- 1.- Martinez-Tapia C, et al. *Optimizing the G8 screening tool for older patients with cancer: diagnostic performance and validation of a six-item. The Oncologist* 2016; 21: 188-95.
- 2.- Bellera CA, et al. *Modeling individual and relative accuracy of screening tools in geriatric oncology. Ann Oncol* 2017; 1152-7.
